# Supplementary material for: Tumor diversity and the trade-off between universal cancer tasks
Source: Nat Commun. 2019 Nov 28;10:5423. doi: 10.1038/s41467-019-13195-1 (PMC6882839; doi:10.1038/s41467-019-13195-1)
Supplement: Supplementary file 4 — Supplementary Data 1 [file 41467_2019_13195_MOESM4_ESM.xlsx]

## Sheet: All 6 cancer types (MSigDB pathways)
archetype #	Feature Name	P value (Mann-Whitney)	Median Difference	Mean Difference	Significant after Benjamini-Hochberg correction?	Is first bin maximal?
1	PEROXISOMAL PART	1.2416e-40	0.29792	0.33967	1	1
1	MICROBODY PART	1.2416e-40	0.29792	0.33967	1	1
1	REACTOME BRANCHED CHAIN AMINO ACID CATABOLISM	5.9594e-24	0.26464	0.26937	1	1
1	REACTOME PEROXISOMAL LIPID METABOLISM	2.5542e-23	0.24724	0.26599	1	1
1	REACTOME XENOBIOTICS	2.7945e-07	0.23596	0.41589	1	1
1	PEROXISOMAL MEMBRANE	2.9342e-32	0.21792	0.24599	1	1
1	MICROBODY MEMBRANE	2.9342e-32	0.21792	0.24599	1	1
1	KEGG GLYCOSYLPHOSPHATIDYLINOSITOL GPI ANCHOR BIOSYNTHESIS	9.6042e-34	0.19344	0.19499	1	1
1	KEGG ASCORBATE AND ALDARATE METABOLISM	0.00060958	0.17789	0.2313	1	1
1	PEROXISOME ORGANIZATION AND BIOGENESIS	1.0895e-29	0.17689	0.19349	1	1
1	BIOCARTA VDR PATHWAY	2.4531e-10	0.176	0.18684	1	1
1	REACTOME SYNTHESIS OF GLYCOSYLPHOSPHATIDYLINOSITOL GPI	6.2953e-25	0.16339	0.1882	1	1
1	MICROBODY	9.5696e-21	0.15434	0.16523	1	1
1	PEROXISOME	9.5696e-21	0.15434	0.16523	1	1
1	REGULATION OF CELLULAR PH	0.00014159	0.14264	0.17125	1	1
1	HISTONE DEACETYLASE BINDING	5.9135e-09	0.12543	0.13996	1	1
1	KEGG PROPANOATE METABOLISM	3.2019e-05	0.12436	0.10184	1	1
1	REACTOME GLUCURONIDATION	0.0028431	0.12191	0.25493	1	1
1	REACTOME MITOCHONDRIAL FATTY ACID BETA OXIDATION	1.0889e-05	0.11605	0.13185	1	1
1	REACTOME SYNTHESIS OF PIPS AT THE LATE ENDOSOME MEMBRANE	4.9145e-07	0.11192	0.11572	1	1
1	GOLGI STACK	1.3575e-11	0.10956	0.12171	1	1
1	REGULATION OF PH	0.0050786	0.10625	0.11585	1	1
1	REACTOME REGULATION OF AMPK ACTIVITY VIA LKB1	8.6766e-09	0.10129	0.099669	1	1
1	BIOCARTA RARRXR PATHWAY	2.2446e-08	0.10109	0.13764	1	1
1	REACTOME ACTIVATED AMPK STIMULATES FATTY ACID OXIDATION IN MUSCLE	5.9867e-07	0.10018	0.092077	1	1
1	PHOSPHOINOSITIDE METABOLIC PROCESS	1.9169e-11	0.096639	0.088804	1	1
1	REACTOME SYNTHESIS OF PIPS AT THE EARLY ENDOSOME MEMBRANE	0.00030146	0.0964	0.093277	1	1
1	SPERMATID DIFFERENTIATION	0.00010988	0.095973	0.15811	1	1
1	REACTOME ACTIVATION OF CHAPERONES BY ATF6 ALPHA	0.0001224	0.094355	0.077881	1	1
1	PROTEIN AMINO ACID LIPIDATION	1.1211e-11	0.094021	0.089946	1	1
1	REACTOME RECRUITMENT OF NUMA TO MITOTIC CENTROSOMES	8.863e-05	0.09155	0.075959	1	1
1	AEROBIC RESPIRATION	5.1371e-05	0.088307	0.075549	1	1
1	MITOCHONDRIAL OUTER MEMBRANE	2.3397e-06	0.08805	0.054439	1	1
1	REACTOME RNA POL I TRANSCRIPTION INITIATION	2.9673e-08	0.086971	0.082128	1	1
1	INTRA GOLGI VESICLE MEDIATED TRANSPORT	2.5654e-10	0.085992	0.084994	1	1
1	BIOCARTA P35ALZHEIMERS PATHWAY	0.0023464	0.084809	0.0545	1	1
1	REACTOME ENERGY DEPENDENT REGULATION OF MTOR BY LKB1 AMPK	1.7589e-10	0.081112	0.10247	1	1
1	ER NUCLEAR SIGNALING PATHWAY	1.7981e-06	0.080844	0.089563	1	1
1	HISTONE ACETYLTRANSFERASE ACTIVITY	0.0093405	0.0781	0.074124	1	1
1	PID BETACATENIN DEG PATHWAY	5.2041e-07	0.078006	0.091564	1	1
1	REACTOME FORMATION OF INCISION COMPLEX IN GG NER	0.00018927	0.077495	0.055605	1	1
1	MITOCHONDRIAL MEMBRANE ORGANIZATION AND BIOGENESIS	2.2512e-06	0.076682	0.05594	1	1
1	PHOSPHOINOSITIDE BIOSYNTHETIC PROCESS	1.5927e-13	0.073829	0.098775	1	1
1	HYDROLASE ACTIVITY ACTING ON CARBON NITROGEN NOT PEPTIDEBONDSIN LINEAR AMIDES	0.0025085	0.073219	0.068454	1	1
1	GENE SILENCING	0.0040958	0.06928	0.033113	1	1
1	POST GOLGI VESICLE MEDIATED TRANSPORT	0.0011999	0.067071	0.072631	1	1
1	PROTEIN POLYUBIQUITINATION	2.5531e-05	0.067055	0.061152	1	1
1	REACTOME GENERIC TRANSCRIPTION PATHWAY	0.0025402	0.063963	0.069321	1	1
1	LIPOPROTEIN METABOLIC PROCESS	0.016991	0.058909	0.03937	1	1
1	GOLGI VESICLE TRANSPORT	4.0878e-09	0.054692	0.065409	1	1
1	GOLGI ASSOCIATED VESICLE	0.0012442	0.054486	0.057975	1	1
1	BIOCARTA ETC PATHWAY	0.0010329	0.0493	0.070594	1	1
1	KEGG NON HOMOLOGOUS END JOINING	0.0097611	0.0488	0.035172	1	1
1	BIOCARTA MTOR PATHWAY	8.5427e-05	0.046283	0.05041	1	1
1	ORGANELLE OUTER MEMBRANE	0.0041027	0.043163	0.028007	1	1
1	REACTOME POST TRANSLATIONAL MODIFICATION SYNTHESIS OF GPI ANCHORED PROTEINS	1.9895e-05	0.040281	0.064955	1	1
1	PROTEIN DEACETYLASE ACTIVITY	0.043358	0.03409	0.038442	1	1
1	PROTEIN UBIQUITINATION	0.0556	0.028632	0.02554	1	1
2	STRUCTURAL CONSTITUENT OF RIBOSOME	4.2186e-83	1.1422	1.0951	1	1
2	KEGG RIBOSOME	6.8909e-79	1.0976	1.055	1	1
2	REACTOME PEPTIDE CHAIN ELONGATION	1.1908e-77	1.085	1.0516	1	1
2	REACTOME INFLUENZA VIRAL RNA TRANSCRIPTION AND REPLICATION	1.6967e-79	0.96211	0.93882	1	1
2	REACTOME SRP DEPENDENT COTRANSLATIONAL PROTEIN TARGETING TO MEMBRANE	2.3888e-79	0.88231	0.85964	1	1
2	REACTOME 3 UTR MEDIATED TRANSLATIONAL REGULATION	9.3061e-74	0.87663	0.84542	1	1
2	REACTOME FORMATION OF ATP BY CHEMIOSMOTIC COUPLING	3.7188e-82	0.87037	0.85266	1	1
2	REACTOME RESPIRATORY ELECTRON TRANSPORT	5.2855e-86	0.87037	0.82756	1	1
2	RIBOSOMAL SUBUNIT	2.2371e-91	0.86339	0.8462	1	1
2	REACTOME NONSENSE MEDIATED DECAY ENHANCED BY THE EXON JUNCTION COMPLEX	1.1056e-75	0.8523	0.82734	1	1
2	ORGANELLAR RIBOSOME	1.3183e-90	0.85137	0.81547	1	1
2	MITOCHONDRIAL RIBOSOME	1.3183e-90	0.85137	0.81547	1	1
2	NADH DEHYDROGENASE COMPLEX	1.102e-86	0.84028	0.85211	1	1
2	MITOCHONDRIAL RESPIRATORY CHAIN COMPLEX I	1.102e-86	0.84028	0.85211	1	1
2	RESPIRATORY CHAIN COMPLEX I	1.102e-86	0.84028	0.85211	1	1
2	REACTOME RESPIRATORY ELECTRON TRANSPORT ATP SYNTHESIS BY CHEMIOSMOTIC COUPLING AND HEAT PRODUCTION BY UNCOUPLING PROTEINS	9.4942e-87	0.82765	0.80859	1	1
2	REACTOME FORMATION OF THE TERNARY COMPLEX AND SUBSEQUENTLY THE 43S COMPLEX	2.7571e-70	0.81141	0.78535	1	1
2	CYTOCHROME C OXIDASE ACTIVITY	1.1396e-77	0.78154	0.75758	1	1
2	NEGATIVE REGULATION OF HYDROLASE ACTIVITY	2.6133e-62	0.76748	0.75308	1	1
2	APOPTOTIC MITOCHONDRIAL CHANGES	4.8687e-43	0.70258	0.64523	1	1
2	REACTOME ACTIVATION OF THE MRNA UPON BINDING OF THE CAP BINDING COMPLEX AND EIFS AND SUBSEQUENT BINDING TO 43S	4.1217e-66	0.69722	0.67195	1	1
2	MITOCHONDRIAL RESPIRATORY CHAIN	4.573e-83	0.6817	0.68355	1	1
2	KEGG OXIDATIVE PHOSPHORYLATION	3.5014e-87	0.68166	0.66202	1	1
2	REACTOME TRANSLATION	3.5495e-74	0.67885	0.67861	1	1
2	RIBOSOME	1.4696e-88	0.67135	0.67452	1	1
2	REACTOME TRANSLOCATION OF ZAP 70 TO IMMUNOLOGICAL SYNAPSE	6.7467e-07	0.65802	0.6108	1	1
2	MITOCHONDRIAL MEMBRANE PART	1.0405e-87	0.65366	0.64615	1	1
2	REACTOME INFLUENZA LIFE CYCLE	1.0268e-71	0.63665	0.61815	1	1
2	ACUTE INFLAMMATORY RESPONSE	6.2974e-23	0.6048	0.61164	1	1
2	KEGG PARKINSONS DISEASE	1.0027e-85	0.59745	0.58302	1	1
2	REGULATION OF MUSCLE CONTRACTION	1.2274e-42	0.59221	0.56341	1	1
2	KEGG PROTEASOME	2.7241e-69	0.57691	0.52798	1	1
2	REACTOME VIF MEDIATED DEGRADATION OF APOBEC3G	3.1868e-75	0.5753	0.53418	1	1
2	MITOCHONDRIAL INNER MEMBRANE	3.6608e-85	0.56906	0.5726	1	1
2	REACTOME MRNA DECAY BY 3 TO 5 EXORIBONUCLEASE	1.6423e-77	0.56883	0.55976	1	1
2	PROTON TRANSPORTING TWO SECTOR ATPASE COMPLEX	2.4536e-70	0.54828	0.55375	1	1
2	REACTOME HDL MEDIATED LIPID TRANSPORT	4.7574e-27	0.54474	0.51995	1	1
2	REACTOME DESTABILIZATION OF MRNA BY AUF1 HNRNP D0	1.6094e-71	0.54061	0.49296	1	1
2	REACTOME ER PHAGOSOME PATHWAY	1.611e-60	0.53988	0.5255	1	1
2	REACTOME METABOLISM OF MRNA	4.2539e-80	0.53965	0.51894	1	1
2	REACTOME STRIATED MUSCLE CONTRACTION	5.1693e-33	0.5258	0.52051	1	1
2	REACTOME CDK MEDIATED PHOSPHORYLATION AND REMOVAL OF CDC6	3.1307e-66	0.52296	0.48089	1	1
2	REACTOME TCA CYCLE AND RESPIRATORY ELECTRON TRANSPORT	8.4452e-77	0.52246	0.50479	1	1
2	ORGANELLAR SMALL RIBOSOMAL SUBUNIT	7.8529e-69	0.52204	0.50117	1	1
2	MITOCHONDRIAL SMALL RIBOSOMAL SUBUNIT	7.8529e-69	0.52204	0.50117	1	1
2	SMALL RIBOSOMAL SUBUNIT	7.8529e-69	0.52204	0.50117	1	1
2	GLUTATHIONE TRANSFERASE ACTIVITY	3.7855e-17	0.51134	0.56109	1	1
2	REACTOME P53 INDEPENDENT G1 S DNA DAMAGE CHECKPOINT	1.1308e-65	0.50704	0.4718	1	1
2	REACTOME REGULATION OF ORNITHINE DECARBOXYLASE ODC	1.4237e-68	0.50697	0.47632	1	1
2	REACTOME CDT1 ASSOCIATION WITH THE CDC6 ORC ORIGIN COMPLEX	7.2709e-63	0.504	0.47689	1	1
2	REACTOME AUTODEGRADATION OF THE E3 UBIQUITIN LIGASE COP1	2.5442e-70	0.49925	0.46896	1	1
2	REACTOME CROSS PRESENTATION OF SOLUBLE EXOGENOUS ANTIGENS ENDOSOMES	9.1442e-64	0.49713	0.48967	1	1
2	REACTOME VIRAL MESSENGER RNA SYNTHESIS	9.155e-84	0.49536	0.49949	1	1
2	REACTOME SCF BETA TRCP MEDIATED DEGRADATION OF EMI1	1.8229e-65	0.49403	0.45665	1	1
2	REACTOME BASE FREE SUGAR PHOSPHATE REMOVAL VIA THE SINGLE NUCLEOTIDE REPLACEMENT PATHWAY	1.1864e-58	0.48543	0.52122	1	1
2	ORGANELLE INNER MEMBRANE	8.1216e-84	0.47915	0.50044	1	1
2	REACTOME RESOLUTION OF AP SITES VIA THE MULTIPLE NUCLEOTIDE PATCH REPLACEMENT PATHWAY	1.3287e-65	0.47833	0.49839	1	1
2	REACTOME INITIAL TRIGGERING OF COMPLEMENT	1.0886e-11	0.47745	0.49169	1	1
2	BIOCARTA CLASSIC PATHWAY	5.2133e-08	0.47643	0.44265	1	1
2	REACTOME MITOCHONDRIAL PROTEIN IMPORT	1.0386e-73	0.47388	0.4479	1	1
2	SMALL NUCLEAR RIBONUCLEOPROTEIN COMPLEX	1.7712e-69	0.46513	0.45268	1	1
2	REACTOME ANTIGEN PROCESSING CROSS PRESENTATION	1.2897e-43	0.46345	0.4383	1	1
2	IMMUNOLOGICAL SYNAPSE	1.2346e-05	0.46305	0.42142	1	1
2	REACTOME AUTODEGRADATION OF CDH1 BY CDH1 APC C	2.1916e-69	0.45152	0.42924	1	1
2	MITOCHONDRIAL MEMBRANE	1.7905e-82	0.4487	0.4494	1	1
2	MITOCHONDRIAL ENVELOPE	7.9579e-81	0.44562	0.42057	1	1
2	CHEMOKINE ACTIVITY	5.5291e-07	0.44206	0.35715	1	1
2	REACTOME POST CHAPERONIN TUBULIN FOLDING PATHWAY	8.0648e-31	0.43638	0.42865	1	1
2	MITOCHONDRION ORGANIZATION AND BIOGENESIS	8.024e-78	0.43191	0.43796	1	1
2	REACTOME SCFSKP2 MEDIATED DEGRADATION OF P27 P21	1.8247e-54	0.42917	0.39827	1	1
2	NEUROPEPTIDE HORMONE ACTIVITY	5.8468e-18	0.42755	0.4699	1	1
2	REACTOME PREFOLDIN MEDIATED TRANSFER OF SUBSTRATE TO CCT TRIC	4.4523e-40	0.42432	0.38455	1	1
2	REACTOME METABOLISM OF RNA	1.0719e-72	0.42254	0.40995	1	1
2	REACTOME MRNA SPLICING MINOR PATHWAY	9.2753e-75	0.42252	0.41881	1	1
2	BIOCARTA PROTEASOME PATHWAY	1.3108e-54	0.42026	0.37994	1	1
2	MITOCHONDRIAL PART	1.0361e-80	0.41991	0.40991	1	1
2	MITOCHONDRIAL MATRIX	4.9775e-73	0.41757	0.39893	1	1
2	MITOCHONDRIAL LUMEN	4.9775e-73	0.41757	0.39893	1	1
2	REACTOME APC C CDH1 MEDIATED DEGRADATION OF CDC20 AND OTHER APC C CDH1 TARGETED PROTEINS IN LATE MITOSIS EARLY G1	2.0357e-49	0.41327	0.38795	1	1
2	NEGATIVE REGULATION OF SECRETION	5.8079e-16	0.41188	0.35726	1	1
2	MANNOSYLTRANSFERASE ACTIVITY	1.3155e-61	0.41075	0.40328	1	1
2	REACTOME P53 DEPENDENT G1 DNA DAMAGE RESPONSE	5.2478e-59	0.41013	0.38113	1	1
2	REACTOME BASE EXCISION REPAIR	6.3312e-60	0.41004	0.43212	1	1
2	CHEMOKINE RECEPTOR BINDING	1.3973e-06	0.40954	0.3467	1	1
2	REACTOME SYNTHESIS OF SUBSTRATES IN N GLYCAN BIOSYTHESIS	1.7683e-56	0.40884	0.37899	1	1
2	REACTOME ASSEMBLY OF THE PRE REPLICATIVE COMPLEX	1.2066e-42	0.4088	0.39132	1	1
2	ALDO KETO REDUCTASE ACTIVITY	8.3107e-20	0.40846	0.46948	1	1
2	MYOSIN COMPLEX	2.8078e-31	0.40199	0.38722	1	1
2	G PROTEIN COUPLED RECEPTOR BINDING	2.8078e-09	0.40109	0.36501	1	1
2	REACTOME REGULATION OF APOPTOSIS	1.1154e-65	0.39831	0.37413	1	1
2	OXIDOREDUCTASE ACTIVITY ACTING ON NADH OR NADPH	1.9983e-52	0.38923	0.38999	1	1
2	RESPONSE TO TOXIN	9.5202e-17	0.38522	0.36372	1	1
2	BIOCARTA GLYCOLYSIS PATHWAY	4.916e-26	0.38096	0.34885	1	1
2	REACTOME ABORTIVE ELONGATION OF HIV1 TRANSCRIPT IN THE ABSENCE OF TAT	3.2472e-77	0.38088	0.38827	1	1
2	REACTOME RESOLUTION OF AP SITES VIA THE SINGLE NUCLEOTIDE REPLACEMENT PATHWAY	1.4487e-50	0.38032	0.41249	1	1
2	REACTOME APC C CDC20 MEDIATED DEGRADATION OF MITOTIC PROTEINS	3.0266e-46	0.37993	0.3637	1	1
2	BIOCARTA COMP PATHWAY	4.251e-07	0.37909	0.35593	1	1
2	TRANSLATION	3.2877e-66	0.37282	0.35601	1	1
2	STEROL BINDING	3.8782e-23	0.36974	0.34203	1	1
2	SERINE TYPE ENDOPEPTIDASE ACTIVITY	4.7486e-19	0.36691	0.34823	1	1
2	NEGATIVE REGULATION OF TRANSCRIPTION FACTOR ACTIVITY	1.6323e-30	0.36503	0.35517	1	1
2	REACTOME CYCLIN E ASSOCIATED EVENTS DURING G1 S TRANSITION	1.6913e-45	0.36267	0.33254	1	1
2	CONTRACTILE FIBER PART	5.0826e-18	0.35938	0.33853	1	1
2	RRNA PROCESSING	1.6939e-50	0.35919	0.37641	1	1
2	REACTOME ORC1 REMOVAL FROM CHROMATIN	2.0921e-39	0.35524	0.33172	1	1
2	REACTOME FORMATION OF TUBULIN FOLDING INTERMEDIATES BY CCT TRIC	5.0923e-20	0.34959	0.29035	1	1
2	SUGAR BINDING	1.2939e-15	0.34841	0.37017	1	1
2	REACTOME ACTIVATION OF NF KAPPAB IN B CELLS	1.9825e-57	0.34836	0.32186	1	1
2	PROTEIN MATURATION	3.4047e-40	0.34829	0.32642	1	1
2	KEGG HUNTINGTONS DISEASE	4.2721e-77	0.34656	0.33487	1	1
2	INTRAMOLECULAR OXIDOREDUCTASE ACTIVITY	7.8106e-33	0.34305	0.33791	1	1
2	LIPID HOMEOSTASIS	2.324e-18	0.34227	0.30623	1	1
2	REACTOME SLBP DEPENDENT PROCESSING OF REPLICATION DEPENDENT HISTONE PRE MRNAS	8.1111e-44	0.33996	0.32207	1	1
2	SARCOMERE	1.2213e-12	0.33975	0.32528	1	1
2	RRNA METABOLIC PROCESS	2.9019e-48	0.33929	0.36777	1	1
2	STRUCTURAL MOLECULE ACTIVITY	2.6436e-39	0.33901	0.35183	1	1
2	PID INTEGRIN2 PATHWAY	3.5309e-09	0.33862	0.31612	1	1
2	HYDROGEN ION TRANSMEMBRANE TRANSPORTER ACTIVITY	6.091e-46	0.33677	0.3336	1	1
2	KEGG ALLOGRAFT REJECTION	4.4208e-06	0.33601	0.37493	1	1
2	REACTOME SIGNALING BY WNT	4.7923e-59	0.33564	0.29719	1	1
2	STEROID DEHYDROGENASE ACTIVITY	2.167e-19	0.33558	0.3587	1	1
2	RNA ELONGATION	1.0259e-74	0.33384	0.34651	1	1
2	CONTRACTILE FIBER	4.9148e-13	0.33362	0.27388	1	1
2	BIOCARTA MTA3 PATHWAY	1.0988e-24	0.33042	0.34004	1	1
2	REACTOME DEGRADATION OF THE EXTRACELLULAR MATRIX	2.8185e-09	0.32756	0.30617	1	1
2	BIOCARTA AHSP PATHWAY	5.1985e-12	0.32732	0.33072	1	1
2	REACTOME REGULATION OF MRNA STABILITY BY PROTEINS THAT BIND AU RICH ELEMENTS	2.4299e-63	0.32638	0.30423	1	1
2	BIOCARTA SARS PATHWAY	1.0807e-17	0.32582	0.29777	1	1
2	HUMORAL IMMUNE RESPONSE	9.1531e-09	0.32371	0.31015	1	1
2	REACTOME MUSCLE CONTRACTION	5.3413e-16	0.32228	0.28921	1	1
2	REACTOME ANDROGEN BIOSYNTHESIS	1.3328e-11	0.32114	0.27337	1	1
2	REACTOME ACTIVATION OF IRF3 IRF7 MEDIATED BY TBK1 IKK EPSILON	4.8117e-19	0.31758	0.30862	1	1
2	TRIACYLGLYCEROL METABOLIC PROCESS	8.035e-16	0.31639	0.3442	1	1
2	REACTOME METABOLISM OF PORPHYRINS	6.8946e-38	0.31631	0.3121	1	1
2	PROTEASOME COMPLEX	1.0904e-46	0.31345	0.30089	1	1
2	KEGG SULFUR METABOLISM	1.05e-25	0.31082	0.34969	1	1
2	REACTOME DESTABILIZATION OF MRNA BY KSRP	2.7328e-61	0.30907	0.30219	1	1
2	NEGATIVE REGULATION OF DNA BINDING	8.86e-24	0.30779	0.29471	1	1
2	COFACTOR TRANSPORT	4.7152e-15	0.30672	0.31005	1	1
2	PROTEIN DEACETYLASE ACTIVITY	1.5299e-43	0.30575	0.30376	1	1
2	AMYLOID PRECURSOR PROTEIN METABOLIC PROCESS	8.5545e-24	0.3056	0.27147	1	1
2	RNA POLYMERASE ACTIVITY	9.6052e-50	0.30437	0.31244	1	1
2	REACTOME GENERATION OF SECOND MESSENGER MOLECULES	0.0029627	0.30304	0.25337	1	1
2	KEGG ARACHIDONIC ACID METABOLISM	6.1955e-20	0.30242	0.31959	1	1
2	MITOCHONDRION	1.4226e-63	0.30236	0.28398	1	1
2	CORNIFIED ENVELOPE	7.1324e-06	0.30188	0.31437	1	1
2	OXIDOREDUCTASE ACTIVITY ACTING ON PEROXIDE AS ACCEPTOR	4.5207e-23	0.30125	0.36084	1	1
2	REACTOME M G1 TRANSITION	1.0054e-20	0.30039	0.27183	1	1
2	RIBONUCLEOPROTEIN COMPLEX	2.9226e-66	0.29945	0.29499	1	1
2	KEGG TYPE I DIABETES MELLITUS	2.2983e-06	0.29924	0.3206	1	1
2	RESPONSE TO OXIDATIVE STRESS	1.5749e-46	0.29844	0.31679	1	1
2	KEGG GLUTATHIONE METABOLISM	1.5715e-29	0.29726	0.3249	1	1
2	REACTOME PYRIMIDINE CATABOLISM	1.6725e-18	0.29718	0.2927	1	1
2	REACTOME PROSTACYCLIN SIGNALLING THROUGH PROSTACYCLIN RECEPTOR	1.1963e-20	0.29397	0.25568	1	1
2	KEGG ASTHMA	1.0717e-06	0.29129	0.34991	1	1
2	REACTOME ACYL CHAIN REMODELLING OF PI	7.2637e-09	0.29086	0.28758	1	1
2	REACTOME RNA POL III CHAIN ELONGATION	1.3754e-59	0.29061	0.30079	1	1
2	OXYGEN AND REACTIVE OXYGEN SPECIES METABOLIC PROCESS	3.4508e-26	0.29038	0.31688	1	1
2	KEGG ALZHEIMERS DISEASE	5.8225e-62	0.29017	0.28457	1	1
2	ISOPRENOID METABOLIC PROCESS	2.4663e-20	0.28905	0.2899	1	1
2	REACTOME RIP MEDIATED NFKB ACTIVATION VIA DAI	4.0557e-13	0.28394	0.25952	1	1
2	REGULATION OF LIPID METABOLIC PROCESS	3.466e-17	0.28233	0.27127	1	1
2	PHOSPHOTRANSFERASE ACTIVITY PHOSPHATE GROUP AS ACCEPTOR	1.6481e-32	0.27793	0.29423	1	1
2	REACTOME RNA POL III TRANSCRIPTION TERMINATION	2.2021e-54	0.27528	0.26779	1	1
2	RIBONUCLEASE ACTIVITY	5.706e-29	0.27476	0.26207	1	1
2	KEGG RNA POLYMERASE	4.5838e-50	0.27437	0.26907	1	1
2	REACTOME GLUTATHIONE CONJUGATION	2.4498e-19	0.27412	0.34705	1	1
2	ICOSANOID METABOLIC PROCESS	1.999e-09	0.27405	0.27711	1	1
2	REACTOME NFKB IS ACTIVATED AND SIGNALS SURVIVAL	1.2599e-23	0.27371	0.29626	1	1
2	REACTOME LATENT INFECTION OF HOMO SAPIENS WITH MYCOBACTERIUM TUBERCULOSIS	6.572e-20	0.27317	0.2582	1	1
2	NEGATIVE REGULATION OF BINDING	4.1298e-22	0.27189	0.26539	1	1
2	REACTOME ENDOSOMAL SORTING COMPLEX REQUIRED FOR TRANSPORT ESCRT	1.7867e-51	0.27049	0.24677	1	1
2	REACTOME REGULATION OF INSULIN LIKE GROWTH FACTOR IGF ACTIVITY BY INSULIN LIKE GROWTH FACTOR BINDING PROTEINS IGFBPS	5.5019e-05	0.27029	0.18418	1	1
2	KEGG TAURINE AND HYPOTAURINE METABOLISM	6.2435e-09	0.26988	0.22278	1	1
2	REACTOME REMOVAL OF THE FLAP INTERMEDIATE FROM THE C STRAND	8.6982e-21	0.26976	0.27594	1	1
2	RIBOSOME BIOGENESIS AND ASSEMBLY	1.8065e-31	0.26931	0.25757	1	1
2	PHOSPHOLIPASE A2 ACTIVITY	2.2088e-08	0.26834	0.28376	1	1
2	REACTOME METABOLISM OF PROTEINS	1.37e-60	0.26832	0.24509	1	1
2	SUPEROXIDE METABOLIC PROCESS	4.0636e-14	0.26793	0.27378	1	1
2	REGULATION OF HORMONE SECRETION	0.00017978	0.26694	0.17397	1	1
2	REACTOME GAMMA CARBOXYLATION TRANSPORT AND AMINO TERMINAL CLEAVAGE OF PROTEINS	3.0912e-11	0.26221	0.28899	1	1
2	REACTOME LIPOPROTEIN METABOLISM	4.4302e-13	0.26173	0.26789	1	1
2	TRANSFERASE ACTIVITY TRANSFERRING ALKYL OR ARYLOTHER THAN METHYLGROUPS	2.1079e-15	0.26092	0.27143	1	1
2	REACTOME CHYLOMICRON MEDIATED LIPID TRANSPORT	4.9748e-12	0.25962	0.27517	1	1
2	REACTOME SYNTHESIS OF DNA	1.4396e-20	0.25948	0.25288	1	1
2	REGULATION OF HOMEOSTATIC PROCESS	1.0359e-17	0.25899	0.22226	1	1
2	DEACETYLASE ACTIVITY	4.2671e-34	0.2575	0.2651	1	1
2	KEGG CARDIAC MUSCLE CONTRACTION	2.3328e-24	0.25667	0.24932	1	1
2	REACTOME REGULATION OF MITOTIC CELL CYCLE	3.687e-23	0.25657	0.24749	1	1
2	NEGATIVE REGULATION OF CYTOKINE BIOSYNTHETIC PROCESS	5.3304e-07	0.25614	0.2124	1	1
2	REACTOME SYNTHESIS AND INTERCONVERSION OF NUCLEOTIDE DI AND TRIPHOSPHATES	5.9442e-29	0.25606	0.26263	1	1
2	MAINTENANCE OF CELLULAR LOCALIZATION	9.3334e-16	0.25409	0.2368	1	1
2	SERINE HYDROLASE ACTIVITY	3.7733e-12	0.25402	0.25339	1	1
2	REACTOME NEF MEDIATES DOWN MODULATION OF CELL SURFACE RECEPTORS BY RECRUITING THEM TO CLATHRIN ADAPTERS	5.7945e-17	0.2537	0.26917	1	1
2	HYDROLASE ACTIVITY HYDROLYZING N GLYCOSYL COMPOUNDS	1.9973e-30	0.25357	0.27589	1	1
2	REACTOME PYRIMIDINE METABOLISM	3.3115e-23	0.25353	0.23152	1	1
2	REACTOME ADVANCED GLYCOSYLATION ENDPRODUCT RECEPTOR SIGNALING	8.7151e-12	0.2533	0.245	1	1
2	CHAPERONE BINDING	2.9311e-41	0.24986	0.26109	1	1
2	SERINE TYPE PEPTIDASE ACTIVITY	6.3191e-12	0.24894	0.24846	1	1
2	KEGG ANTIGEN PROCESSING AND PRESENTATION	4.0122e-08	0.24625	0.23226	1	1
2	STRUCTURAL CONSTITUENT OF MUSCLE	3.8239e-11	0.24558	0.21165	1	1
2	HORMONE ACTIVITY	1.1402e-12	0.24332	0.23032	1	1
2	AEROBIC RESPIRATION	1.3934e-31	0.24199	0.23626	1	1
2	REACTOME GLUCONEOGENESIS	2.3798e-29	0.24101	0.26485	1	1
2	REACTOME ACYL CHAIN REMODELLING OF PS	1.4312e-06	0.24043	0.22302	1	1
2	CALCIUM INDEPENDENT CELL CELL ADHESION	2.7178e-07	0.23926	0.2099	1	1
2	KEGG BASE EXCISION REPAIR	5.1849e-34	0.2392	0.24791	1	1
2	OXIDOREDUCTASE ACTIVITY GO 0016616	8.7255e-24	0.23873	0.28312	1	1
2	ELECTRON CARRIER ACTIVITY	4.392e-27	0.23858	0.24459	1	1
2	BIOCARTA ETC PATHWAY	3.9823e-22	0.23722	0.21022	1	1
2	NUCLEOLAR PART	2.1156e-34	0.23608	0.24581	1	1
2	KEGG TERPENOID BACKBONE BIOSYNTHESIS	8.742e-12	0.23537	0.22862	1	1
2	KEGG GLYOXYLATE AND DICARBOXYLATE METABOLISM	1.6152e-26	0.23511	0.22141	1	1
2	HYDROLASE ACTIVITY ACTING ON CARBON NITROGEN NOT PEPTIDEBONDSIN LINEAR AMIDES	4.3939e-24	0.23468	0.2621	1	1
2	REGULATION OF PROTEIN SECRETION	1.705e-09	0.2334	0.21992	1	1
2	STEROID BINDING	2.4819e-15	0.23068	0.23507	1	1
2	SPLICEOSOME	9.4331e-45	0.23	0.21657	1	1
2	RIBONUCLEOPROTEIN BINDING	1.4212e-46	0.22982	0.23363	1	1
2	TRANSFERASE ACTIVITY TRANSFERRING PENTOSYL GROUPS	5.3389e-26	0.22964	0.20267	1	1
2	REACTOME COMPLEMENT CASCADE	3.469e-05	0.22887	0.23679	1	1
2	T CELL DIFFERENTIATION	0.0016935	0.2268	0.1944	1	1
2	PATTERN RECOGNITION RECEPTOR ACTIVITY	0.00013408	0.22585	0.23196	1	1
2	MAINTENANCE OF CELLULAR PROTEIN LOCALIZATION	1.7265e-17	0.22572	0.2262	1	1
2	GLYCEROPHOSPHOLIPID BIOSYNTHETIC PROCESS	4.0648e-41	0.2246	0.21374	1	1
2	POSITIVE REGULATION OF PROTEIN SECRETION	4.7194e-05	0.22455	0.18955	1	1
2	KEGG SYSTEMIC LUPUS ERYTHEMATOSUS	9.9908e-11	0.22365	0.23283	1	1
2	PID RHODOPSIN PATHWAY	1.2708e-15	0.222	0.21144	1	1
2	ENZYME INHIBITOR ACTIVITY	4.1351e-24	0.22199	0.23113	1	1
2	PROTEIN KINASE INHIBITOR ACTIVITY	2.7077e-13	0.22163	0.23636	1	1
2	FATTY ACID BETA OXIDATION	2.328e-14	0.22076	0.17492	1	1
2	CELLULAR BIOSYNTHETIC PROCESS	2.1327e-45	0.22014	0.21313	1	1
2	KEGG SPLICEOSOME	3.2885e-41	0.21912	0.20347	1	1
2	OXIDOREDUCTASE ACTIVITY ACTING ON CH OH GROUP OF DONORS	3.5612e-20	0.21745	0.23967	1	1
2	REACTOME S PHASE	7.2015e-15	0.21672	0.20555	1	1
2	KEGG PRIMARY IMMUNODEFICIENCY	0.0014128	0.21621	0.23549	1	1
2	PROTEASE INHIBITOR ACTIVITY	5.4119e-09	0.2157	0.2121	1	1
2	VIRAL GENOME REPLICATION	1.4511e-07	0.21486	0.16864	1	1
2	REACTOME ACTIVATION OF GENES BY ATF4	1.7225e-21	0.21304	0.20462	1	1
2	REACTOME RNA POL III TRANSCRIPTION INITIATION FROM TYPE 3 PROMOTER	3.8752e-40	0.21205	0.18552	1	1
2	REACTOME REPAIR SYNTHESIS FOR GAP FILLING BY DNA POL IN TC NER	1.7632e-11	0.20764	0.20174	1	1
2	DNA FRAGMENTATION DURING APOPTOSIS	3.1819e-15	0.2076	0.23871	1	1
2	INTERLEUKIN 1 SECRETION	0.00013527	0.20627	0.19731	1	1
2	MAINTENANCE OF PROTEIN LOCALIZATION	1.7989e-11	0.20327	0.19143	1	1
2	REGULATION OF BLOOD PRESSURE	5.4468e-10	0.20302	0.19771	1	1
2	REACTOME TRANSFERRIN ENDOCYTOSIS AND RECYCLING	2.3176e-21	0.20143	0.19817	1	1
2	NITROGEN COMPOUND CATABOLIC PROCESS	1.7616e-15	0.19996	0.22792	1	1
2	REGULATION OF MEMBRANE POTENTIAL	5.8838e-15	0.19752	0.18916	1	1
2	REACTOME TANDEM PORE DOMAIN POTASSIUM CHANNELS	9.6503e-05	0.19742	0.16965	1	1
2	DNA CATABOLIC PROCESS	5.0548e-27	0.19728	0.20698	1	1
2	REACTOME FORMATION OF THE HIV1 EARLY ELONGATION COMPLEX	9.2025e-43	0.19683	0.20562	1	1
2	REACTOME RETROGRADE NEUROTROPHIN SIGNALLING	4.5103e-10	0.19492	0.16809	1	1
2	REACTOME ELONGATION ARREST AND RECOVERY	5.0978e-47	0.19377	0.20146	1	1
2	SERINE TYPE ENDOPEPTIDASE INHIBITOR ACTIVITY	3.0159e-05	0.19351	0.14469	1	1
2	REACTOME INSULIN RECEPTOR RECYCLING	4.4122e-21	0.19338	0.1848	1	1
2	FATTY ACID BIOSYNTHETIC PROCESS	3.7948e-10	0.19303	0.22043	1	1
2	MITOCHONDRIAL TRANSPORT	1.5362e-33	0.19206	0.19185	1	1
2	EXTRACELLULAR SPACE	9.5892e-08	0.19143	0.17038	1	1
2	KEGG PYRIMIDINE METABOLISM	4.2666e-39	0.19127	0.18617	1	1
2	NEUROPEPTIDE SIGNALING PATHWAY	3.8549e-11	0.18816	0.22087	1	1
2	VITAMIN TRANSPORT	2.6187e-06	0.18815	0.1993	1	1
2	APOPTOTIC NUCLEAR CHANGES	1.1788e-16	0.18657	0.18261	1	1
2	PID HIF1APATHWAY	1.3829e-24	0.18648	0.195	1	1
2	REACTOME HOST INTERACTIONS OF HIV FACTORS	1.1999e-25	0.18647	0.17211	1	1
2	KEGG FOLATE BIOSYNTHESIS	3.621e-11	0.18545	0.17161	1	1
2	DEOXYRIBONUCLEASE ACTIVITY	2.506e-21	0.18518	0.1696	1	1
2	CELL STRUCTURE DISASSEMBLY DURING APOPTOSIS	4.5366e-11	0.18448	0.19462	1	1
2	ENDORIBONUCLEASE ACTIVITY	5.5312e-12	0.18383	0.16865	1	1
2	REACTOME COMMON PATHWAY	0.014233	0.18189	0.11267	1	1
2	KEGG AMINO SUGAR AND NUCLEOTIDE SUGAR METABOLISM	4.1944e-18	0.18186	0.16431	1	1
2	REACTOME THE ROLE OF NEF IN HIV1 REPLICATION AND DISEASE PATHOGENESIS	6.0524e-08	0.18172	0.19869	1	1
2	REACTOME CHOLESTEROL BIOSYNTHESIS	1.7156e-10	0.18165	0.19732	1	1
2	MONOVALENT INORGANIC CATION TRANSMEMBRANE TRANSPORTER ACTIVITY	2.4048e-17	0.18093	0.17807	1	1
2	REACTOME STEROID HORMONES	7.8809e-08	0.17914	0.15129	1	1
2	REACTOME G BETA GAMMA SIGNALLING THROUGH PLC BETA	3.5595e-10	0.17864	0.1678	1	1
2	REACTOME EARLY PHASE OF HIV LIFE CYCLE	8.8727e-10	0.17849	0.17541	1	1
2	HORMONE SECRETION	0.001584	0.17827	0.12608	1	1
2	REACTOME GLYCOLYSIS	5.6514e-14	0.1777	0.16663	1	1
2	KEGG CYTOSOLIC DNA SENSING PATHWAY	2.8022e-10	0.1766	0.16499	1	1
2	REACTOME METABOLISM OF NUCLEOTIDES	5.3273e-22	0.17648	0.1624	1	1
2	REACTOME APC C CDC20 MEDIATED DEGRADATION OF CYCLIN B	2.0827e-10	0.17565	0.17533	1	1
2	FEEDING BEHAVIOR	4.5247e-08	0.17465	0.14729	1	1
2	REACTOME OXYGEN DEPENDENT PROLINE HYDROXYLATION OF HYPOXIA INDUCIBLE FACTOR ALPHA	1.0843e-14	0.17417	0.15307	1	1
2	KEGG COMPLEMENT AND COAGULATION CASCADES	0.00012152	0.17275	0.17009	1	1
2	MACROMOLECULE BIOSYNTHETIC PROCESS	5.3262e-31	0.17199	0.16041	1	1
2	REACTOME PROTEIN FOLDING	1.2145e-21	0.17189	0.15155	1	1
2	LIPID TRANSPORT	1.1066e-10	0.17138	0.14349	1	1
2	REACTOME DESTABILIZATION OF MRNA BY BRF1	8.6257e-43	0.17064	0.18179	1	1
2	REACTOME DOWNSTREAM SIGNALING EVENTS OF B CELL RECEPTOR BCR	1.51e-37	0.16917	0.15865	1	1
2	LIPOPROTEIN BIOSYNTHETIC PROCESS	6.1186e-29	0.16889	0.16676	1	1
2	REACTOME ACYL CHAIN REMODELLING OF PG	0.00017231	0.16853	0.16721	1	1
2	METALLOENDOPEPTIDASE ACTIVITY	0.00068948	0.16816	0.15167	1	1
2	REACTOME G1 S TRANSITION	1.1099e-08	0.16775	0.15921	1	1
2	DETECTION OF BIOTIC STIMULUS	0.0059565	0.16772	0.13163	1	1
2	REACTOME EXTENSION OF TELOMERES	8.7744e-10	0.16707	0.19242	1	1
2	PID P38 MK2PATHWAY	3.8061e-13	0.16643	0.15778	1	1
2	CARBON OXYGEN LYASE ACTIVITY	1.2107e-12	0.16514	0.16371	1	1
2	MAINTENANCE OF LOCALIZATION	9.7053e-12	0.16509	0.20261	1	1
2	KERATINOCYTE DIFFERENTIATION	0.0094789	0.16441	0.16495	1	1
2	CELLULAR RESPIRATION	2.0283e-11	0.16408	0.13767	1	1
2	REACTOME BIOSYNTHESIS OF THE N GLYCAN PRECURSOR DOLICHOL LIPID LINKED OLIGOSACCHARIDE LLO AND TRANSFER TO A NASCENT PROTEIN	1.9758e-23	0.16317	0.14464	1	1
2	REGULATION OF LYMPHOCYTE ACTIVATION	0.0017667	0.1629	0.16628	1	1
2	CELLULAR CARBOHYDRATE CATABOLIC PROCESS	5.1888e-12	0.1609	0.15141	1	1
2	REACTOME CELL CYCLE CHECKPOINTS	1.9072e-10	0.16026	0.16834	1	1
2	REACTOME TRAF6 MEDIATED NFKB ACTIVATION	4.6951e-08	0.16	0.14724	1	1
2	XENOBIOTIC METABOLIC PROCESS	0.017176	0.15965	0.11739	1	1
2	CARBOHYDRATE CATABOLIC PROCESS	1.2295e-12	0.15956	0.15236	1	1
2	REACTOME MRNA SPLICING	1.2956e-27	0.15937	0.15326	1	1
2	REACTOME LIPID DIGESTION MOBILIZATION AND TRANSPORT	2.4343e-07	0.15717	0.1491	1	1
2	ELECTRON TRANSPORT GO 0006118	1.8903e-11	0.15705	0.14739	1	1
2	CARBOHYDRATE BINDING	0.00010904	0.15693	0.14387	1	1
2	CARBON CARBON LYASE ACTIVITY	2.6935e-06	0.15677	0.13353	1	1
2	LIPOPROTEIN METABOLIC PROCESS	7.2223e-19	0.15506	0.13389	1	1
2	INFLAMMATORY RESPONSE	0.0071113	0.15432	0.10865	1	1
2	SMOOTH MUSCLE CONTRACTION GO 0006939	0.017776	0.15314	0.10179	1	1
2	ANTIOXIDANT ACTIVITY	5.8157e-11	0.15307	0.19234	1	1
2	UNFOLDED PROTEIN BINDING	4.2369e-21	0.15111	0.13282	1	1
2	REACTOME PERK REGULATED GENE EXPRESSION	9.7203e-12	0.14995	0.13145	1	1
2	RNA BINDING	2.0096e-30	0.14951	0.15622	1	1
2	OVULATION CYCLE	1.2815e-05	0.14684	0.16192	1	1
2	DEFENSE RESPONSE	0.0022765	0.14654	0.11883	1	1
2	GLUCOSE CATABOLIC PROCESS	2.6556e-09	0.14576	0.14657	1	1
2	KEGG DRUG METABOLISM OTHER ENZYMES	0.00030614	0.14468	0.040196	1	1
2	KEGG PROTEIN EXPORT	5.9961e-19	0.14395	0.13589	1	1
2	REACTOME PTM GAMMA CARBOXYLATION HYPUSINE FORMATION AND ARYLSULFATASE ACTIVATION	4.9748e-08	0.14235	0.14679	1	1
2	REACTOME METABOLISM OF AMINO ACIDS AND DERIVATIVES	4.9172e-15	0.14181	0.13604	1	1
2	DNA DAMAGE RESPONSESIGNAL TRANSDUCTION RESULTING IN INDUCTION OF APOPTOSIS	9.7685e-07	0.14092	0.14463	1	1
2	REGULATION OF HEART CONTRACTION	0.0058368	0.13904	0.12141	1	1
2	ENDONUCLEASE ACTIVITY GO 0016893	5.1197e-05	0.13885	0.11075	1	1
2	RESPONSE TO BACTERIUM	0.0025469	0.13865	0.11472	1	1
2	KEGG ALPHA LINOLENIC ACID METABOLISM	2.3159e-06	0.13849	0.1765	1	1
2	LEUKOCYTE CHEMOTAXIS	0.082456	0.13781	0.10595	1	1
2	KEGG FRUCTOSE AND MANNOSE METABOLISM	5.5508e-18	0.13711	0.15933	1	1
2	COFACTOR METABOLIC PROCESS	2.3708e-14	0.13709	0.12211	1	1
2	VITAMIN BINDING	0.0028345	0.13257	0.12124	1	1
2	TRANSFERASE ACTIVITY TRANSFERRING SULFUR CONTAINING GROUPS	8.4208e-05	0.13187	0.11311	1	1
2	REACTOME METABOLISM OF STEROID HORMONES AND VITAMINS A AND D	2.9268e-06	0.13181	0.11771	1	1
2	INDUCTION OF APOPTOSIS BY EXTRACELLULAR SIGNALS	9.0421e-11	0.13162	0.1485	1	1
2	REACTOME P75NTR SIGNALS VIA NFKB	6.388e-08	0.13114	0.12595	1	1
2	REACTOME TRANSCRIPTION COUPLED NER TC NER	5.5118e-17	0.13099	0.1336	1	1
2	REACTOME DESTABILIZATION OF MRNA BY TRISTETRAPROLIN TTP	1.6882e-22	0.13081	0.13376	1	1
2	INORGANIC ANION TRANSPORT	0.00075879	0.13074	0.13845	1	1
2	REACTOME IRON UPTAKE AND TRANSPORT	3.1239e-11	0.13054	0.13771	1	1
2	COENZYME METABOLIC PROCESS	2.2724e-11	0.12979	0.13316	1	1
2	REACTOME ENDOGENOUS STEROLS	0.043391	0.12931	0.05993	1	1
2	REACTOME G PROTEIN ACTIVATION	1.8711e-08	0.12913	0.12929	1	1
2	BIOCARTA CDK5 PATHWAY	0.00055064	0.12896	0.10124	1	1
2	BRUSH BORDER	0.00095936	0.1287	0.11923	1	1
2	STEROID METABOLIC PROCESS	2.6184e-11	0.12842	0.1456	1	1
2	NUCLEOTIDE KINASE ACTIVITY	6.8126e-09	0.12828	0.15011	1	1
2	PROTEIN FOLDING	5.5651e-23	0.12817	0.12874	1	1
2	REACTOME RECYCLING OF BILE ACIDS AND SALTS	0.043106	0.12723	0.040919	1	1
2	REACTOME MICRORNA MIRNA BIOGENESIS	1.1179e-17	0.1272	0.12546	1	1
2	REACTOME SYNTHESIS OF BILE ACIDS AND BILE SALTS VIA 7ALPHA HYDROXYCHOLESTEROL	0.017736	0.12679	0.024616	1	1
2	BIOSYNTHETIC PROCESS	1.5864e-21	0.12589	0.12045	1	1
2	STEROID BIOSYNTHETIC PROCESS	2.8692e-07	0.12553	0.14227	1	1
2	REGULATION OF G PROTEIN COUPLED RECEPTOR PROTEIN SIGNALING PATHWAY	2.3168e-05	0.12432	0.13033	1	1
2	N METHYLTRANSFERASE ACTIVITY	3.2e-06	0.12348	0.10494	1	1
2	ISOMERASE ACTIVITY	4.329e-11	0.1231	0.12125	1	1
2	RESPONSE TO VIRUS	0.0036375	0.1231	0.10339	1	1
2	PROTEIN AMINO ACID LIPIDATION	2.4761e-13	0.12238	0.093836	1	1
2	ANION TRANSPORT	0.00014384	0.1201	0.10184	1	1
2	ENDOPEPTIDASE ACTIVITY	2.2193e-07	0.11972	0.12943	1	1
2	LEUKOCYTE ACTIVATION	0.022459	0.11951	0.10866	1	1
2	REACTOME RNA POL III TRANSCRIPTION INITIATION FROM TYPE 2 PROMOTER	1.5058e-21	0.11922	0.12199	1	1
2	PID HNF3BPATHWAY	8.7143e-05	0.11888	0.10873	1	1
2	REACTOME INTRINSIC PATHWAY	0.00014596	0.11878	0.12679	1	1
2	LYSOSOME ORGANIZATION AND BIOGENESIS	4.1764e-08	0.1177	0.12153	1	1
2	REACTOME PROCESSIVE SYNTHESIS ON THE LAGGING STRAND	5.6501e-05	0.11742	0.1165	1	1
2	LIGASE ACTIVITY FORMING CARBON OXYGEN BONDS	6.3434e-09	0.11697	0.10186	1	1
2	ENVELOPE	2.0847e-34	0.11687	0.12443	1	1
2	ORGANELLE ENVELOPE	2.0835e-34	0.11687	0.12443	1	1
2	LYASE ACTIVITY	7.2233e-12	0.11581	0.12517	1	1
2	PID CONE PATHWAY	3.6211e-06	0.11521	0.10708	1	1
2	SECONDARY METABOLIC PROCESS	2.5705e-07	0.11453	0.097364	1	1
2	METHYLTRANSFERASE ACTIVITY	1.0057e-14	0.11437	0.11546	1	1
2	BETA TUBULIN BINDING	3.2584e-15	0.11382	0.11008	1	1
2	MONOSACCHARIDE BINDING	0.001655	0.11316	0.13031	1	1
2	KEGG LYSOSOME	1.1849e-10	0.11173	0.1159	1	1
2	VACUOLE ORGANIZATION AND BIOGENESIS	4.5195e-06	0.11138	0.11229	1	1
2	REACTOME NUCLEOTIDE EXCISION REPAIR	9.621e-16	0.11124	0.11547	1	1
2	KEGG GALACTOSE METABOLISM	1.2155e-06	0.10913	0.088588	1	1
2	INNATE IMMUNE RESPONSE	0.022716	0.10801	0.083149	1	1
2	KEGG PORPHYRIN AND CHLOROPHYLL METABOLISM	5.5771e-05	0.10703	0.076029	1	1
2	PHOSPHOINOSITIDE BIOSYNTHETIC PROCESS	1.165e-08	0.10445	0.06723	1	1
2	PID P38GAMMADELTAPATHWAY	0.0001175	0.10408	0.097442	1	1
2	HORMONE METABOLIC PROCESS	0.00052662	0.10406	0.10647	1	1
2	REACTOME P75NTR RECRUITS SIGNALLING COMPLEXES	8.8788e-06	0.10389	0.11116	1	1
2	INTEGRAL TO ENDOPLASMIC RETICULUM MEMBRANE	4.2718e-07	0.10366	0.082644	1	1
2	INTRINSIC TO ENDOPLASMIC RETICULUM MEMBRANE	4.2708e-07	0.10366	0.082644	1	1
2	REACTOME SYNTHESIS OF PA	0.0026377	0.1036	0.092201	1	1
2	PID ALPHASYNUCLEIN PATHWAY	0.0011267	0.10308	0.10428	1	1
2	REACTOME HIV INFECTION	3.6882e-13	0.10307	0.087601	1	1
2	KEGG PYRUVATE METABOLISM	9.5962e-08	0.10259	0.094763	1	1
2	CARBOXYLESTERASE ACTIVITY	0.00016563	0.10247	0.13619	1	1
2	REACTOME MRNA CAPPING	6.1285e-15	0.10236	0.10278	1	1
2	OXIDOREDUCTASE ACTIVITY	2.4336e-08	0.10093	0.11449	1	1
2	KEGG SNARE INTERACTIONS IN VESICULAR TRANSPORT	5.3044e-16	0.10041	0.10547	1	1
2	REACTOME TGF BETA RECEPTOR SIGNALING IN EMT EPITHELIAL TO MESENCHYMAL TRANSITION	2.776e-08	0.098636	0.092334	1	1
2	RESPONSE TO HEAT	3.1441e-09	0.09765	0.086101	1	1
2	CELL SOMA	9.483e-06	0.09762	0.10812	1	1
2	REACTOME SIGNALING BY THE B CELL RECEPTOR BCR	1.3063e-08	0.09719	0.091667	1	1
2	PHOSPHOLIPID BIOSYNTHETIC PROCESS	4.1364e-15	0.095418	0.098123	1	1
2	REACTOME RNA POL III TRANSCRIPTION	1.3869e-12	0.095291	0.080168	1	1
2	RESPONSE TO TEMPERATURE STIMULUS	2.6544e-07	0.094825	0.081548	1	1
2	REACTOME MITOCHONDRIAL FATTY ACID BETA OXIDATION	0.0087218	0.093846	0.058897	1	1
2	REACTOME ADP SIGNALLING THROUGH P2RY12	0.0014581	0.089748	0.078967	1	1
2	TRANSFERASE ACTIVITY TRANSFERRING ONE CARBON GROUPS	7.1165e-10	0.088792	0.08843	1	1
2	REACTOME PEPTIDE LIGAND BINDING RECEPTORS	0.0093092	0.087795	0.089144	1	1
2	RNA SPLICINGVIA TRANSESTERIFICATION REACTIONS	2.8157e-12	0.08742	0.08257	1	1
2	NUCLEASE ACTIVITY	1.8766e-06	0.08604	0.067045	1	1
2	REACTOME PROCESSING OF CAPPED INTRONLESS PRE MRNA	2.1777e-06	0.085252	0.071711	1	1
2	KEGG PRION DISEASES	0.019337	0.084851	0.080726	1	1
2	EMBRYO IMPLANTATION	0.00028178	0.084329	0.12921	1	1
2	REACTOME GLUCAGON TYPE LIGAND RECEPTORS	0.0011788	0.083836	0.083785	1	1
2	NEGATIVE REGULATION OF CELLULAR BIOSYNTHETIC PROCESS	0.0015973	0.083638	0.06797	1	1
2	REACTOME ACTIVATION OF CHAPERONE GENES BY XBP1S	6.137e-09	0.082802	0.072447	1	1
2	KEGG GLYCEROPHOSPHOLIPID METABOLISM	2.8212e-06	0.081445	0.080493	1	1
2	REGULATION OF ENDOCYTOSIS	8.7111e-05	0.0767	0.086818	1	1
2	REACTOME GLUCOSE METABOLISM	1.3275e-06	0.076672	0.079026	1	1
2	REACTOME CLEAVAGE OF GROWING TRANSCRIPT IN THE TERMINATION REGION	5.4521e-07	0.075529	0.072228	1	1
2	CARBOXY LYASE ACTIVITY	0.00076983	0.074736	0.10456	1	1
2	NUCLEOBASENUCLEOSIDENUCLEOTIDE KINASE ACTIVITY	3.7045e-07	0.073596	0.086125	1	1
2	BIOCARTA SALMONELLA PATHWAY	0.00065251	0.073546	0.0725	1	1
2	EXCRETION	0.03998	0.073403	0.055782	1	1
2	GENERATION OF PRECURSOR METABOLITES AND ENERGY	0.00019416	0.072936	0.063485	1	1
2	REACTOME LYSOSOME VESICLE BIOGENESIS	0.00051595	0.069387	0.052272	1	1
2	PYRIMIDINE NUCLEOTIDE METABOLIC PROCESS	0.0097298	0.06841	0.071313	1	1
2	ENERGY DERIVATION BY OXIDATION OF ORGANIC COMPOUNDS	0.0062345	0.068338	0.035888	1	1
2	LIPID CATABOLIC PROCESS	0.0090739	0.067084	0.040145	1	1
2	CELLULAR PROTEIN COMPLEX ASSEMBLY	1.2308e-05	0.066285	0.054213	1	1
2	LIPID BIOSYNTHETIC PROCESS	8.2593e-08	0.065573	0.07757	1	1
2	ACTIN FILAMENT ORGANIZATION	0.0029674	0.064854	0.070343	1	1
2	ALCOHOL METABOLIC PROCESS	7.5168e-07	0.06448	0.073361	1	1
2	REGULATION OF CATABOLIC PROCESS	0.0064579	0.061325	0.0595	1	1
2	REACTOME POST TRANSLATIONAL MODIFICATION SYNTHESIS OF GPI ANCHORED PROTEINS	0.0010151	0.059458	0.036092	1	1
2	REACTOME UNFOLDED PROTEIN RESPONSE	0.00020998	0.057895	0.037778	1	1
2	MITOCHONDRIAL OUTER MEMBRANE	0.003829	0.052328	0.030503	1	1
2	ORGANELLE OUTER MEMBRANE	1.463e-07	0.051575	0.061531	1	1
2	NITROGEN COMPOUND BIOSYNTHETIC PROCESS	0.0087365	0.051228	0.055546	1	1
2	PROTEIN SERINE THREONINE PHOSPHATASE COMPLEX	4.5052e-05	0.04936	0.049097	1	1
2	RIBONUCLEOPROTEIN COMPLEX BIOGENESIS AND ASSEMBLY	0.000142	0.047636	0.048821	1	1
2	REACTOME MRNA DECAY BY 5 TO 3 EXORIBONUCLEASE	0.0018369	0.046793	0.046079	1	1
2	REACTOME DEADENYLATION DEPENDENT MRNA DECAY	0.00015402	0.045323	0.043572	1	1
2	OUTER MEMBRANE	3.7935e-05	0.042156	0.044194	1	1
2	REACTOME REGULATORY RNA PATHWAYS	0.009229	0.028108	0.02942	1	1
3	REACTOME G1 S SPECIFIC TRANSCRIPTION	6.571e-63	1.0086	1.0166	1	1
3	REACTOME UNWINDING OF DNA	2.5139e-58	0.98887	0.9917	1	1
3	GABA RECEPTOR ACTIVITY	5.0978e-47	0.92706	0.91467	1	1
3	MITOTIC SPINDLE ORGANIZATION AND BIOGENESIS	1.3003e-63	0.89902	0.89622	1	1
3	SA REG CASCADE OF CYCLIN EXPR	2.6556e-61	0.85428	0.88911	1	1
3	SPINDLE ORGANIZATION AND BIOGENESIS	1.0888e-62	0.83723	0.83216	1	1
3	REACTOME APOPTOTIC CLEAVAGE OF CELL ADHESION PROTEINS	2.2318e-34	0.79446	0.78148	1	1
3	REACTOME G0 AND EARLY G1	1.2352e-65	0.78319	0.7916	1	1
3	REACTOME ACTIVATION OF THE PRE REPLICATIVE COMPLEX	2.1013e-53	0.77699	0.75188	1	1
3	BIOCARTA MCM PATHWAY	2.5763e-50	0.77492	0.76991	1	1
3	REACTOME CYCLIN A B1 ASSOCIATED EVENTS DURING G2 M TRANSITION	1.9875e-52	0.75482	0.79091	1	1
3	NUCLEAR CHROMATIN	1.9035e-88	0.71582	0.7259	1	1
3	KEGG GLYCOSPHINGOLIPID BIOSYNTHESIS LACTO AND NEOLACTO SERIES	9.8559e-64	0.71322	0.70346	1	1
3	REACTOME ACTIVATION OF ATR IN RESPONSE TO REPLICATION STRESS	1.1599e-55	0.70533	0.67861	1	1
3	REACTOME NA CL DEPENDENT NEUROTRANSMITTER TRANSPORTERS	4.5686e-50	0.69799	0.70722	1	1
3	MITOTIC SISTER CHROMATID SEGREGATION	1.5445e-54	0.69612	0.72966	1	1
3	BIOCARTA RANMS PATHWAY	6.0522e-59	0.69393	0.72185	1	1
3	REACTOME G2 M CHECKPOINTS	1.1787e-55	0.69211	0.68221	1	1
3	INTERMEDIATE FILAMENT CYTOSKELETON	9.6352e-28	0.68372	0.66248	1	1
3	INTERMEDIATE FILAMENT	9.6352e-28	0.68372	0.66248	1	1
3	PID AURORA B PATHWAY	2.3654e-58	0.67923	0.67159	1	1
3	BIOCARTA SARS PATHWAY	2.3644e-59	0.67716	0.6645	1	1
3	BIOCARTA SKP2E2F PATHWAY	1.0705e-65	0.67068	0.6996	1	1
3	CHROMOSOME CONDENSATION	5.2305e-57	0.6639	0.67895	1	1
3	REACTOME E2F MEDIATED REGULATION OF DNA REPLICATION	6.9268e-55	0.65957	0.66912	1	1
3	SISTER CHROMATID SEGREGATION	5.3355e-49	0.65854	0.66561	1	1
3	CORNIFIED ENVELOPE	3.9811e-18	0.65736	0.8262	1	1
3	REACTOME DNA STRAND ELONGATION	4.5385e-50	0.65617	0.6222	1	1
3	ECTODERM DEVELOPMENT	8.0321e-26	0.62316	0.55819	1	1
3	REGULATION OF MITOTIC CELL CYCLE	1.9583e-67	0.61721	0.58041	1	1
3	BIOCARTA SRCRPTP PATHWAY	6.0107e-49	0.60659	0.58824	1	1
3	NEGATIVE REGULATION OF INTRACELLULAR TRANSPORT	5.2392e-55	0.60126	0.60729	1	1
3	G2 M TRANSITION OF MITOTIC CELL CYCLE	2.3247e-35	0.59918	0.52783	1	1
3	NF KAPPAB BINDING	1.848e-65	0.59344	0.53795	1	1
3	SPINDLE	1.8527e-51	0.58786	0.56447	1	1
3	BIOCARTA TH1TH2 PATHWAY	2.9311e-09	0.58371	0.42442	1	1
3	CHEMOKINE ACTIVITY	3.2953e-12	0.5836	0.52562	1	1
3	CHEMOKINE RECEPTOR BINDING	1.534e-11	0.57878	0.51107	1	1
3	BIOCARTA IL12 PATHWAY	1.9478e-09	0.57631	0.43084	1	1
3	BIOCARTA CELLCYCLE PATHWAY	9.1594e-50	0.56706	0.54821	1	1
3	BIOCARTA CTL PATHWAY	0.0016762	0.5654	0.29314	1	1
3	MAINTENANCE OF CELLULAR PROTEIN LOCALIZATION	4.612e-64	0.56441	0.56115	1	1
3	PID PLK1 PATHWAY	4.4269e-47	0.56264	0.54964	1	1
3	REACTOME AMINO ACID SYNTHESIS AND INTERCONVERSION TRANSAMINATION	6.2929e-54	0.55865	0.53759	1	1
3	REGULATION OF MITOSIS	5.0403e-59	0.55033	0.56677	1	1
3	MITOSIS	7.7883e-62	0.54861	0.54545	1	1
3	M PHASE OF MITOTIC CELL CYCLE	9.8896e-61	0.54783	0.54743	1	1
3	EPIDERMIS DEVELOPMENT	1.1923e-20	0.54113	0.48943	1	1
3	MITOTIC CELL CYCLE	1.0806e-67	0.53264	0.50051	1	1
3	BIOCARTA NO2IL12 PATHWAY	2.2146e-06	0.53196	0.42773	1	1
3	REACTOME MITOTIC PROMETAPHASE	1.3883e-53	0.52978	0.52537	1	1
3	M PHASE	2.5888e-58	0.52891	0.50266	1	1
3	MITOTIC CELL CYCLE CHECKPOINT	7.5494e-55	0.52756	0.50584	1	1
3	OXIDOREDUCTASE ACTIVITY GO 0016706	4.3976e-38	0.52252	0.47948	1	1
3	REACTOME FANCONI ANEMIA PATHWAY	1.5758e-51	0.5217	0.50004	1	1
3	REACTOME KINESINS	3.0561e-42	0.51902	0.51061	1	1
3	REACTOME DNA REPLICATION	8.9774e-59	0.51732	0.5003	1	1
3	REACTOME MITOTIC M M G1 PHASES	2.6986e-59	0.51383	0.49962	1	1
3	BIOCARTA P27 PATHWAY	3.6492e-60	0.51133	0.46864	1	1
3	PID FOXM1PATHWAY	1.0567e-48	0.51046	0.51864	1	1
3	REACTOME PASSIVE TRANSPORT BY AQUAPORINS	8.262e-13	0.50878	0.41505	1	1
3	PHOSPHOLIPASE C ACTIVITY	2.5777e-27	0.50334	0.53677	1	1
3	KEGG CELL CYCLE	2.2054e-62	0.50259	0.46559	1	1
3	NEGATIVE REGULATION OF DNA REPLICATION	5.4104e-56	0.50215	0.49935	1	1
3	BIOCARTA BLYMPHOCYTE PATHWAY	0.0038231	0.50202	0.23885	1	1
3	ENDONUCLEASE ACTIVITY GO 0016893	3.4498e-66	0.49833	0.52363	1	1
3	VIRAL GENOME REPLICATION	7.6307e-35	0.49547	0.47492	1	1
3	CHROMOSOME SEGREGATION	2.833e-46	0.49464	0.47838	1	1
3	KEGG DNA REPLICATION	4.8648e-48	0.49361	0.48273	1	1
3	BIOCARTA PTC1 PATHWAY	1.5333e-46	0.49338	0.5138	1	1
3	DNA REPLICATION INITIATION	3.0853e-45	0.49165	0.48222	1	1
3	SPINDLE POLE	1.2974e-38	0.49085	0.47054	1	1
3	BIOCARTA SET PATHWAY	1.8594e-16	0.49015	0.35777	1	1
3	REACTOME M G1 TRANSITION	4.7799e-55	0.4889	0.45011	1	1
3	BIOCARTA CYTOKINE PATHWAY	1.5162e-13	0.48607	0.36392	1	1
3	G PROTEIN COUPLED RECEPTOR BINDING	1.8892e-09	0.48474	0.37397	1	1
3	MAINTENANCE OF PROTEIN LOCALIZATION	4.5735e-53	0.48362	0.47847	1	1
3	LEARNING AND OR MEMORY	1.4511e-27	0.4772	0.45895	1	1
3	REACTOME ADVANCED GLYCOSYLATION ENDPRODUCT RECEPTOR SIGNALING	7.1037e-32	0.47612	0.45097	1	1
3	IMMUNOLOGICAL SYNAPSE	0.0061668	0.47431	0.23399	1	1
3	CELL CYCLE PHASE	1.3119e-58	0.47207	0.43911	1	1
3	CHROMATIN	1.3542e-75	0.46518	0.47387	1	1
3	NUCLEAR CHROMOSOME PART	3.6546e-75	0.4613	0.45848	1	1
3	REACTOME MITOTIC G1 G1 S PHASES	7.0095e-59	0.4598	0.43826	1	1
3	SMOOTH MUSCLE CONTRACTION GO 0006939	1.6748e-19	0.45952	0.46385	1	1
3	PROTEIN AMINO ACID ADP RIBOSYLATION	4.0008e-44	0.45723	0.43169	1	1
3	CELL CYCLE PROCESS	2.8906e-58	0.45678	0.43276	1	1
3	N ACETYLGLUCOSAMINE METABOLIC PROCESS	1.0548e-26	0.45633	0.43443	1	1
3	KEGG PRIMARY IMMUNODEFICIENCY	0.00034184	0.45361	0.2606	1	1
3	POSITIVE REGULATION OF CELL ADHESION	4.5775e-17	0.45132	0.42605	1	1
3	ENDORIBONUCLEASE ACTIVITY	6.5247e-66	0.44745	0.46445	1	1
3	PID MYC ACTIVPATHWAY	5.1829e-71	0.44611	0.4241	1	1
3	CHROMOSOMEPERICENTRIC REGION	5.6112e-45	0.44519	0.4653	1	1
3	MALE GONAD DEVELOPMENT	2.0662e-35	0.44483	0.43111	1	1
3	REACTOME G1 S TRANSITION	2.2607e-52	0.44174	0.42321	1	1
3	REPLICATION FORK	1.8261e-50	0.44072	0.42076	1	1
3	SPINDLE MICROTUBULE	1.0159e-38	0.43949	0.44016	1	1
3	ENDOTHELIAL CELL MIGRATION	2.0346e-19	0.43903	0.38586	1	1
3	GALACTOSYLTRANSFERASE ACTIVITY	2.0793e-46	0.43813	0.42595	1	1
3	BIOCARTA GLYCOLYSIS PATHWAY	1.418e-37	0.43608	0.40476	1	1
3	REACTOME EXTENSION OF TELOMERES	3.1103e-41	0.43175	0.43743	1	1
3	PID ATR PATHWAY	3.1667e-41	0.43141	0.41743	1	1
3	CYTOKINESIS	6.3e-43	0.43093	0.4222	1	1
3	REACTOME CELL CYCLE MITOTIC	1.3069e-57	0.42931	0.42093	1	1
3	CELL CYCLE CHECKPOINT GO 0000075	1.6767e-48	0.42881	0.40674	1	1
3	CELL DIVISION	3.7044e-44	0.42742	0.43008	1	1
3	NEGATIVE REGULATION OF TRANSPORT	1.2245e-53	0.4237	0.44013	1	1
3	EPITHELIAL CELL DIFFERENTIATION	2.3162e-09	0.42309	0.46928	1	1
3	REACTOME SYNTHESIS OF DNA	8.4788e-49	0.42216	0.39564	1	1
3	REACTOME S PHASE	1.7664e-50	0.42211	0.39622	1	1
3	CHROMOSOMAL PART	1.1279e-63	0.42207	0.4175	1	1
3	TRANSFERASE ACTIVITY TRANSFERRING PENTOSYL GROUPS	6.1927e-58	0.42066	0.39018	1	1
3	REGULATION OF SYNAPSE STRUCTURE AND ACTIVITY	1.1399e-16	0.41963	0.3739	1	1
3	REACTOME METABOLISM OF POLYAMINES	9.7792e-59	0.41833	0.43109	1	1
3	REACTOME POL SWITCHING	1.3876e-35	0.41705	0.41342	1	1
3	KEGG GRAFT VERSUS HOST DISEASE	0.00029798	0.41682	0.3131	1	1
3	REACTOME GAP JUNCTION ASSEMBLY	8.3272e-21	0.41414	0.46781	1	1
3	REACTOME LAGGING STRAND SYNTHESIS	1.5501e-37	0.41312	0.40827	1	1
3	G1 PHASE OF MITOTIC CELL CYCLE	2.4894e-49	0.41207	0.42162	1	1
3	REACTOME ASSEMBLY OF THE PRE REPLICATIVE COMPLEX	7.9947e-51	0.41189	0.40478	1	1
3	CALCIUM MEDIATED SIGNALING	5.9146e-16	0.41156	0.35675	1	1
3	GLUCOSAMINE METABOLIC PROCESS	4.2568e-26	0.41138	0.39646	1	1
3	CONDENSED CHROMOSOME	4.4475e-46	0.40934	0.38203	1	1
3	G1 S TRANSITION OF MITOTIC CELL CYCLE	7.4971e-46	0.40888	0.38004	1	1
3	PID BARD1PATHWAY	7.5599e-40	0.40661	0.3821	1	1
3	REGULATION OF DNA REPLICATION	8.7732e-45	0.40632	0.40182	1	1
3	REACTOME CELL CYCLE CHECKPOINTS	7.5599e-55	0.40597	0.40699	1	1
3	REACTOME CHEMOKINE RECEPTORS BIND CHEMOKINES	2.211e-05	0.40364	0.28792	1	1
3	INTERPHASE OF MITOTIC CELL CYCLE	2.9337e-57	0.40206	0.38865	1	1
3	KEGG GLYCOSAMINOGLYCAN BIOSYNTHESIS KERATAN SULFATE	2.3629e-26	0.40193	0.35916	1	1
3	KINESIN COMPLEX	2.191e-25	0.40026	0.35367	1	1
3	BIOCARTA DNAFRAGMENT PATHWAY	1.0378e-26	0.39932	0.35552	1	1
3	KEGG HOMOLOGOUS RECOMBINATION	7.4787e-49	0.39865	0.41623	1	1
3	INTERLEUKIN RECEPTOR ACTIVITY	0.00025105	0.39692	0.22442	1	1
3	REGULATION OF CELL CELL ADHESION	2.8984e-24	0.39515	0.38224	1	1
3	REACTOME APC C CDC20 MEDIATED DEGRADATION OF CYCLIN B	4.4357e-52	0.39514	0.40787	1	1
3	ACTIN FILAMENT BASED MOVEMENT	1.3677e-26	0.39267	0.36133	1	1
3	REACTOME APC CDC20 MEDIATED DEGRADATION OF NEK2A	1.1422e-50	0.3923	0.42266	1	1
3	DNA INTEGRITY CHECKPOINT	1.3274e-55	0.3899	0.38314	1	1
3	CYTOSKELETON DEPENDENT INTRACELLULAR TRANSPORT	3.2649e-30	0.38988	0.33681	1	1
3	STRUCTURAL CONSTITUENT OF CYTOSKELETON	6.6532e-20	0.38958	0.32585	1	1
3	BIOCARTA EPHA4 PATHWAY	2.4419e-10	0.3895	0.38198	1	1
3	NEGATIVE REGULATION OF HYDROLASE ACTIVITY	1.3442e-18	0.38926	0.36442	1	1
3	MICROTUBULE BASED MOVEMENT	1.6459e-19	0.38642	0.32149	1	1
3	INTERPHASE	1.3554e-53	0.38497	0.3691	1	1
3	MEIOTIC CELL CYCLE	9.1518e-39	0.38429	0.37947	1	1
3	VIRAL INFECTIOUS CYCLE	1.1753e-31	0.38428	0.34711	1	1
3	BIOCARTA G2 PATHWAY	4.581e-39	0.38421	0.37527	1	1
3	INTERLEUKIN BINDING	2.3947e-05	0.38384	0.24457	1	1
3	NUCLEAR CHROMOSOME	2.4339e-67	0.3828	0.37643	1	1
3	DNA DEPENDENT DNA REPLICATION	2.7264e-48	0.38268	0.36707	1	1
3	REGULATION OF TYROSINE PHOSPHORYLATION OF STAT PROTEIN	2.5634e-13	0.38165	0.34509	1	1
3	CHROMOSOME	1.4787e-59	0.3802	0.37357	1	1
3	CHROMATIN BINDING	3.6758e-57	0.37958	0.38841	1	1
3	REACTOME IMMUNOREGULATORY INTERACTIONS BETWEEN A LYMPHOID AND A NON LYMPHOID CELL	0.00022008	0.37941	0.24741	1	1
3	REACTOME CELL CYCLE	8.6189e-53	0.37814	0.35412	1	1
3	KERATINOCYTE DIFFERENTIATION	4.0761e-08	0.37791	0.43396	1	1
3	REACTOME REPAIR SYNTHESIS FOR GAP FILLING BY DNA POL IN TC NER	8.1072e-33	0.37709	0.36405	1	1
3	AMINO SUGAR METABOLIC PROCESS	1.0663e-27	0.37579	0.35348	1	1
3	REACTOME REGULATION OF KIT SIGNALING	1.267e-22	0.37511	0.32426	1	1
3	TISSUE DEVELOPMENT	1.3357e-16	0.37481	0.32429	1	1
3	REACTOME REGULATION OF MITOTIC CELL CYCLE	2.1488e-48	0.37436	0.37145	1	1
3	PID IL12 2PATHWAY	4.1978e-05	0.37349	0.24598	1	1
3	INOSITOL OR PHOSPHATIDYLINOSITOL PHOSPHODIESTERASE ACTIVITY	8.3663e-14	0.37141	0.40281	1	1
3	MAINTENANCE OF CELLULAR LOCALIZATION	3.9127e-36	0.3713	0.38581	1	1
3	REACTOME EARLY PHASE OF HIV LIFE CYCLE	3.4112e-30	0.37112	0.33019	1	1
3	NEGATIVE REGULATION OF RESPONSE TO STIMULUS	5.7935e-13	0.36935	0.35885	1	1
3	RRNA METABOLIC PROCESS	1.2192e-42	0.36848	0.37037	1	1
3	REACTOME TAK1 ACTIVATES NFKB BY PHOSPHORYLATION AND ACTIVATION OF IKKS COMPLEX	7.1518e-35	0.3674	0.36083	1	1
3	REACTOME MRNA DECAY BY 3 TO 5 EXORIBONUCLEASE	3.2576e-37	0.36732	0.34996	1	1
3	APOPTOTIC MITOCHONDRIAL CHANGES	5.0275e-15	0.36728	0.3473	1	1
3	CONDENSED NUCLEAR CHROMOSOME	5.7412e-34	0.36668	0.34097	1	1
3	REGULATION OF T CELL ACTIVATION	1.9973e-06	0.36514	0.26808	1	1
3	REACTOME PHOSPHORYLATION OF THE APC C	3.064e-45	0.36369	0.37437	1	1
3	LEUKOCYTE CHEMOTAXIS	1.6805e-08	0.3603	0.31053	1	1
3	PHOSPHOLIPASE C ACTIVATION	2.7073e-21	0.36022	0.36914	1	1
3	REACTOME REMOVAL OF THE FLAP INTERMEDIATE FROM THE C STRAND	7.1955e-33	0.35894	0.33935	1	1
3	BIOCARTA NKT PATHWAY	0.0004207	0.35865	0.20959	1	1
3	T CELL ACTIVATION	2.6546e-05	0.35775	0.24399	1	1
3	LIGASE ACTIVITY FORMING CARBON OXYGEN BONDS	1.5526e-52	0.35771	0.34085	1	1
3	REACTOME GABA A RECEPTOR ACTIVATION	1.7871e-08	0.35749	0.33324	1	1
3	REACTOME APC C CDH1 MEDIATED DEGRADATION OF CDC20 AND OTHER APC C CDH1 TARGETED PROTEINS IN LATE MITOSIS EARLY G1	1.3701e-43	0.35737	0.34227	1	1
3	REGULATION OF JAK STAT CASCADE	2.3882e-15	0.35725	0.31887	1	1
3	REACTOME ORC1 REMOVAL FROM CHROMATIN	2.6078e-44	0.35679	0.34186	1	1
3	REACTOME PROCESSIVE SYNTHESIS ON THE LAGGING STRAND	1.1473e-30	0.3562	0.34127	1	1
3	REACTOME INHIBITION OF THE PROTEOLYTIC ACTIVITY OF APC C REQUIRED FOR THE ONSET OF ANAPHASE BY MITOTIC SPINDLE CHECKPOINT COMPONENTS	1.6637e-46	0.35562	0.37968	1	1
3	REACTOME STRIATED MUSCLE CONTRACTION	8.7001e-13	0.3546	0.31494	1	1
3	PID SYNDECAN 3 PATHWAY	8.6972e-33	0.35291	0.40106	1	1
3	SOLUTE SODIUM SYMPORTER ACTIVITY	2.4079e-21	0.3524	0.3399	1	1
3	REACTOME FORMATION OF TUBULIN FOLDING INTERMEDIATES BY CCT TRIC	1.4704e-24	0.3518	0.31346	1	1
3	NEGATIVE REGULATION OF DNA METABOLIC PROCESS	7.9151e-52	0.35178	0.35605	1	1
3	POSITIVE REGULATION OF DEFENSE RESPONSE	3.6622e-10	0.35079	0.35081	1	1
3	RRNA PROCESSING	9.9634e-42	0.3495	0.3676	1	1
3	KEGG ONE CARBON POOL BY FOLATE	1.8434e-38	0.34688	0.32919	1	1
3	BIOCARTA G1 PATHWAY	2.8871e-29	0.34294	0.33149	1	1
3	T CELL DIFFERENTIATION	0.00020699	0.34293	0.22241	1	1
3	REACTOME PYRUVATE METABOLISM	5.5457e-46	0.33942	0.33959	1	1
3	PID E2F PATHWAY	3.1912e-36	0.33932	0.31146	1	1
3	REGULATION OF T CELL PROLIFERATION	9.0031e-08	0.33857	0.2543	1	1
3	DNA MODIFICATION	1.9419e-34	0.33825	0.33089	1	1
3	NUCLEAR REPLICATION FORK	5.1968e-40	0.33818	0.30972	1	1
3	REACTOME ACTIVATION OF GENES BY ATF4	1.1229e-46	0.3378	0.3226	1	1
3	NEGATIVE REGULATION OF PHOSPHORYLATION	4.7117e-11	0.33413	0.27232	1	1
3	MORPHOGENESIS OF AN EPITHELIUM	7.1891e-13	0.33385	0.39374	1	1
3	PID FANCONI PATHWAY	4.394e-34	0.33175	0.32565	1	1
3	MAP KINASE ACTIVITY	1.2005e-21	0.33073	0.28188	1	1
3	NUCLEOLAR PART	3.8194e-47	0.3293	0.34645	1	1
3	REGULATION OF PEPTIDYL TYROSINE PHOSPHORYLATION	1.4682e-14	0.32861	0.29001	1	1
3	PATTERN RECOGNITION RECEPTOR ACTIVITY	1.3011e-07	0.32819	0.33348	1	1
3	S PHASE	1.4461e-27	0.32814	0.30825	1	1
3	PID IL23PATHWAY	5.4224e-06	0.32738	0.23219	1	1
3	MONOSACCHARIDE TRANSMEMBRANE TRANSPORTER ACTIVITY	1.1502e-15	0.32658	0.30296	1	1
3	REGULATION OF IMMUNE EFFECTOR PROCESS	3.3832e-06	0.32657	0.20957	1	1
3	REACTOME CYTOSOLIC TRNA AMINOACYLATION	5.645e-46	0.32609	0.31982	1	1
3	REACTOME APC C CDC20 MEDIATED DEGRADATION OF MITOTIC PROTEINS	9.6749e-37	0.32589	0.30344	1	1
3	SYNAPSE ORGANIZATION AND BIOGENESIS	4.8758e-09	0.32487	0.29333	1	1
3	POSITIVE REGULATION OF JNK ACTIVITY	4.4111e-27	0.32432	0.28889	1	1
3	REACTOME SCFSKP2 MEDIATED DEGRADATION OF P27 P21	7.147e-37	0.32199	0.30765	1	1
3	KEGG MISMATCH REPAIR	1.2472e-35	0.31936	0.30379	1	1
3	MEIOSIS I	1.5452e-25	0.31886	0.32174	1	1
3	REACTOME PREFOLDIN MEDIATED TRANSFER OF SUBSTRATE TO CCT TRIC	2.5263e-28	0.3185	0.29976	1	1
3	KEGG RNA POLYMERASE	5.4461e-54	0.31798	0.31519	1	1
3	INTERLEUKIN 2 PRODUCTION	3.887e-09	0.31766	0.24755	1	1
3	REACTOME G1 PHASE	9.4633e-48	0.31719	0.30862	1	1
3	REACTOME SLBP DEPENDENT PROCESSING OF REPLICATION DEPENDENT HISTONE PRE MRNAS	1.7457e-34	0.31701	0.30679	1	1
3	RIBONUCLEASE ACTIVITY	2.3502e-37	0.31618	0.30171	1	1
3	CELL CYCLE GO 0007049	6.6881e-50	0.31498	0.28982	1	1
3	CHROMATIN REMODELING	8.3306e-53	0.31284	0.30307	1	1
3	POSITIVE REGULATION OF T CELL ACTIVATION	1.4882e-06	0.31206	0.26242	1	1
3	REACTOME ER PHAGOSOME PATHWAY	1.5388e-22	0.31186	0.27648	1	1
3	RIBOSOME BIOGENESIS AND ASSEMBLY	1.432e-39	0.30971	0.33028	1	1
3	REACTOME P53 INDEPENDENT G1 S DNA DAMAGE CHECKPOINT	3.2133e-31	0.30854	0.27729	1	1
3	REACTOME NEP NS2 INTERACTS WITH THE CELLULAR EXPORT MACHINERY	1.0966e-36	0.30724	0.29831	1	1
3	EUKARYOTIC TRANSLATION INITIATION FACTOR 3 COMPLEX	5.0379e-35	0.30592	0.32364	1	1
3	DNA REPLICATION	2.813e-47	0.30558	0.28081	1	1
3	REACTOME ANTIGEN ACTIVATES B CELL RECEPTOR LEADING TO GENERATION OF SECOND MESSENGERS	6.2966e-09	0.3034	0.24034	1	1
3	REACTOME PERK REGULATED GENE EXPRESSION	2.1761e-45	0.30314	0.28695	1	1
3	VIRAL REPRODUCTIVE PROCESS	5.8279e-26	0.30259	0.28191	1	1
3	SMALL NUCLEAR RIBONUCLEOPROTEIN COMPLEX	2.8257e-39	0.29921	0.29949	1	1
3	LOCOMOTORY BEHAVIOR	0.00010592	0.29914	0.19488	1	1
3	CALCIUM INDEPENDENT CELL CELL ADHESION	9.8868e-14	0.29909	0.35978	1	1
3	INORGANIC ANION TRANSPORT	2.8777e-12	0.29897	0.28618	1	1
3	REACTOME CDT1 ASSOCIATION WITH THE CDC6 ORC ORIGIN COMPLEX	1.2114e-29	0.29782	0.27604	1	1
3	SUGAR TRANSMEMBRANE TRANSPORTER ACTIVITY	4.7651e-16	0.29773	0.28516	1	1
3	KEGG GALACTOSE METABOLISM	2.0693e-36	0.29725	0.2955	1	1
3	BIOCARTA INFLAM PATHWAY	5.5098e-06	0.29686	0.22216	1	1
3	T CELL PROLIFERATION	1.2218e-07	0.2965	0.24744	1	1
3	BIOCARTA DC PATHWAY	0.0013318	0.29635	0.17863	1	1
3	REACTOME CLEAVAGE OF GROWING TRANSCRIPT IN THE TERMINATION REGION	8.2846e-58	0.29609	0.29691	1	1
3	TRNA METABOLIC PROCESS	8.2293e-42	0.29582	0.28709	1	1
3	REGULATION OF DNA METABOLIC PROCESS	6.9816e-39	0.29566	0.27569	1	1
3	BIOCARTA ACTINY PATHWAY	4.3391e-45	0.29545	0.31401	1	1
3	REGULATION OF LYMPHOCYTE ACTIVATION	7.7059e-05	0.29443	0.21098	1	1
3	RNA POLYMERASE ACTIVITY	5.0211e-36	0.29419	0.27746	1	1
3	POSITIVE REGULATION OF LYMPHOCYTE ACTIVATION	1.2975e-05	0.29396	0.2236	1	1
3	MICROTUBULE CYTOSKELETON ORGANIZATION AND BIOGENESIS	1.5014e-37	0.29395	0.28494	1	1
3	BIOCARTA GABA PATHWAY	6.1924e-10	0.29268	0.24266	1	1
3	REACTOME INTERACTIONS OF VPR WITH HOST CELLULAR PROTEINS	1.0507e-49	0.2917	0.3098	1	1
3	REACTOME CYCLIN E ASSOCIATED EVENTS DURING G1 S TRANSITION	2.4326e-35	0.29149	0.28191	1	1
3	KEGG CYSTEINE AND METHIONINE METABOLISM	3.3786e-40	0.28987	0.29679	1	1
3	DOUBLE STRANDED DNA BINDING	7.1815e-56	0.28942	0.28682	1	1
3	NEGATIVE REGULATION OF DNA BINDING	5.8361e-14	0.28899	0.23614	1	1
3	REGULATION OF MUSCLE CONTRACTION	2.0768e-11	0.28731	0.27482	1	1
3	MEIOTIC RECOMBINATION	1.7777e-21	0.28553	0.27823	1	1
3	CELL STRUCTURE DISASSEMBLY DURING APOPTOSIS	2.0554e-13	0.28494	0.2199	1	1
3	PID CD8TCRDOWNSTREAMPATHWAY	7.8845e-06	0.28482	0.18189	1	1
3	RNA 3END PROCESSING	2.2629e-40	0.28412	0.29433	1	1
3	NEGATIVE REGULATION OF BINDING	2.033e-20	0.28336	0.27944	1	1
3	REACTOME MRNA 3 END PROCESSING	1.6317e-57	0.28242	0.28635	1	1
3	BEHAVIOR	7.8172e-08	0.28241	0.20689	1	1
3	KEGG NOD LIKE RECEPTOR SIGNALING PATHWAY	3.4932e-10	0.28196	0.23128	1	1
3	PIGMENT BIOSYNTHETIC PROCESS	7.9318e-34	0.28144	0.25613	1	1
3	POSITIVE REGULATION OF T CELL PROLIFERATION	2.1199e-06	0.28093	0.2558	1	1
3	REACTOME TRANSPORT OF MATURE TRANSCRIPT TO CYTOPLASM	6.0901e-53	0.28021	0.3021	1	1
3	REACTOME MRNA SPLICING MINOR PATHWAY	5.7909e-38	0.27976	0.26978	1	1
3	ACTIVATION OF JNK ACTIVITY	6.0488e-26	0.27856	0.26985	1	1
3	BIOCARTA IL22BP PATHWAY	1.3093e-06	0.27824	0.2041	1	1
3	LYMPHOCYTE ACTIVATION	9.4718e-05	0.27762	0.2034	1	1
3	PID ALPHASYNUCLEIN PATHWAY	9.4449e-18	0.27718	0.27896	1	1
3	KEGG PROTEASOME	1.0894e-20	0.27609	0.23812	1	1
3	REACTOME NEPHRIN INTERACTIONS	4.6244e-25	0.27542	0.33498	1	1
3	REACTOME TRANSPORT OF MATURE MRNA DERIVED FROM AN INTRONLESS TRANSCRIPT	4.4998e-40	0.27541	0.28063	1	1
3	BIOCARTA CASPASE PATHWAY	2.7051e-11	0.27483	0.21218	1	1
3	REACTOME FORMATION OF THE TERNARY COMPLEX AND SUBSEQUENTLY THE 43S COMPLEX	5.6532e-12	0.27446	0.25883	1	1
3	G1 PHASE	1.6328e-31	0.27445	0.2878	1	1
3	REACTOME MITOTIC G2 G2 M PHASES	1.799e-43	0.2731	0.28019	1	1
3	REACTOME CLASS C 3 METABOTROPIC GLUTAMATE PHEROMONE RECEPTORS	1.888e-10	0.27216	0.23999	1	1
3	POSITIVE REGULATION OF CYTOKINE PRODUCTION	8.3997e-07	0.27212	0.21782	1	1
3	SIG REGULATION OF THE ACTIN CYTOSKELETON BY RHO GTPASES	1.2057e-23	0.27184	0.24773	1	1
3	MYOFIBRIL	1.6023e-07	0.27182	0.27452	1	1
3	PROTEIN SERINE THREONINE TYROSINE KINASE ACTIVITY	4.0531e-21	0.2708	0.27581	1	1
3	RNA SPLICING FACTOR ACTIVITYTRANSESTERIFICATION MECHANISM	1.004e-51	0.27063	0.28374	1	1
3	ENDOPLASMIC RETICULUM LUMEN	1.1559e-23	0.27042	0.24629	1	1
3	CALMODULIN BINDING	5.5314e-18	0.26939	0.29738	1	1
3	REACTOME CDK MEDIATED PHOSPHORYLATION AND REMOVAL OF CDC6	2.3148e-23	0.2684	0.23551	1	1
3	REACTOME REVERSIBLE HYDRATION OF CARBON DIOXIDE	3.9755e-09	0.26837	0.25501	1	1
3	REACTOME TRAF6 MEDIATED NFKB ACTIVATION	3.8171e-17	0.26803	0.2278	1	1
3	REACTOME CONVERSION FROM APC C CDC20 TO APC C CDH1 IN LATE ANAPHASE	1.6865e-39	0.26793	0.26972	1	1
3	REACTOME MICRORNA MIRNA BIOGENESIS	9.7901e-54	0.26488	0.26645	1	1
3	REACTOME PURINE CATABOLISM	7.5546e-14	0.26439	0.26286	1	1
3	CYTOKINE BINDING	1.9585e-05	0.26224	0.19157	1	1
3	FUCOSYLTRANSFERASE ACTIVITY	1.1413e-09	0.26134	0.21963	1	1
3	NUCLEOTIDE BIOSYNTHETIC PROCESS	1.3991e-27	0.26098	0.26219	1	1
3	NEGATIVE REGULATION OF PHOSPHATE METABOLIC PROCESS	1.5391e-08	0.26089	0.21631	1	1
3	STEROID BIOSYNTHETIC PROCESS	2.6881e-20	0.2606	0.25063	1	1
3	REACTOME PECAM1 INTERACTIONS	1.0046e-08	0.26038	0.20103	1	1
3	POSITIVE REGULATION OF IMMUNE SYSTEM PROCESS	0.00027832	0.2595	0.15898	1	1
3	REACTOME CRMPS IN SEMA3A SIGNALING	1.0799e-11	0.25874	0.31886	1	1
3	VIRAL REPRODUCTION	8.1095e-20	0.25817	0.22828	1	1
3	REACTOME REGULATION OF GLUCOKINASE BY GLUCOKINASE REGULATORY PROTEIN	1.2592e-33	0.25693	0.2552	1	1
3	SYMPORTER ACTIVITY	6.7289e-17	0.25633	0.23573	1	1
3	REACTOME ACTIVATION OF THE MRNA UPON BINDING OF THE CAP BINDING COMPLEX AND EIFS AND SUBSEQUENT BINDING TO 43S	4.9681e-14	0.25595	0.25578	1	1
3	REGULATION OF CHROMOSOME ORGANIZATION AND BIOGENESIS	1.8423e-22	0.25564	0.25898	1	1
3	SA G1 AND S PHASES	1.9118e-19	0.25554	0.26817	1	1
3	CASPASE REGULATOR ACTIVITY	3.8078e-12	0.25351	0.23703	1	1
3	REACTOME GAP JUNCTION TRAFFICKING	2.6577e-16	0.25326	0.30855	1	1
3	REACTOME SCF BETA TRCP MEDIATED DEGRADATION OF EMI1	3.0902e-24	0.25217	0.23191	1	1
3	DNA FRAGMENTATION DURING APOPTOSIS	1.2446e-15	0.25177	0.25311	1	1
3	REACTOME METABOLISM OF NON CODING RNA	5.7124e-43	0.25138	0.27045	1	1
3	SMALL CONJUGATING PROTEIN SPECIFIC PROTEASE ACTIVITY	8.9683e-24	0.25115	0.25565	1	1
3	S PHASE OF MITOTIC CELL CYCLE	8.0539e-19	0.25075	0.24213	1	1
3	SULFUR METABOLIC PROCESS	2.4465e-18	0.25068	0.21711	1	1
3	PID NFAT TFPATHWAY	1.7786e-05	0.24993	0.169	1	1
3	L AMINO ACID TRANSMEMBRANE TRANSPORTER ACTIVITY	2.5101e-10	0.24977	0.21548	1	1
3	REGULATION OF CYTOKINE PRODUCTION	1.2094e-08	0.24867	0.1949	1	1
3	RNA CATABOLIC PROCESS	6.8981e-32	0.24837	0.22301	1	1
3	PID MYC PATHWAY	2.5362e-46	0.24828	0.24534	1	1
3	DNA PACKAGING	4.4128e-38	0.24778	0.25465	1	1
3	KEGG NATURAL KILLER CELL MEDIATED CYTOTOXICITY	9.0562e-08	0.24567	0.19235	1	1
3	BIOCARTA CBL PATHWAY	2.334e-08	0.24362	0.24248	1	1
3	NUCLEOTIDYLTRANSFERASE ACTIVITY	4.9282e-48	0.24322	0.24766	1	1
3	EXCRETION	2.1693e-09	0.2432	0.17046	1	1
3	REACTOME PROCESSING OF CAPPED INTRONLESS PRE MRNA	9.1908e-40	0.24318	0.23993	1	1
3	INTRAMOLECULAR OXIDOREDUCTASE ACTIVITY	1.1908e-20	0.24273	0.21929	1	1
3	REACTOME TRANSFERRIN ENDOCYTOSIS AND RECYCLING	2.7784e-24	0.24257	0.22497	1	1
3	PID LIS1PATHWAY	3.9054e-22	0.242	0.22182	1	1
3	PID CD8TCRPATHWAY	0.00029982	0.24174	0.17186	1	1
3	POSITIVE REGULATION OF IMMUNE RESPONSE	0.0023724	0.24123	0.13074	1	1
3	PID RHODOPSIN PATHWAY	1.1543e-19	0.24108	0.24584	1	1
3	DNA DAMAGE CHECKPOINT	3.7416e-45	0.24093	0.2346	1	1
3	RESPONSE TO CARBOHYDRATE STIMULUS	5.2113e-22	0.23834	0.2357	1	1
3	REGULATION OF VIRAL REPRODUCTION	5.6607e-11	0.23833	0.2161	1	1
3	ST T CELL SIGNAL TRANSDUCTION	3.0388e-06	0.23815	0.17433	1	1
3	GLYCOLIPID METABOLIC PROCESS	8.6097e-19	0.23761	0.21793	1	1
3	REACTOME DESTABILIZATION OF MRNA BY AUF1 HNRNP D0	2.6615e-20	0.23755	0.20639	1	1
3	KEGG DORSO VENTRAL AXIS FORMATION	6.6908e-19	0.23705	0.23302	1	1
3	REACTOME P53 DEPENDENT G1 DNA DAMAGE RESPONSE	1.1096e-26	0.23652	0.22618	1	1
3	REACTOME TRNA AMINOACYLATION	6.7658e-39	0.2363	0.23254	1	1
3	BIOCARTA RANKL PATHWAY	7.419e-11	0.23615	0.21094	1	1
3	INDUCTION OF APOPTOSIS BY EXTRACELLULAR SIGNALS	4.1204e-21	0.23534	0.21837	1	1
3	REACTOME PROCESSING OF CAPPED INTRON CONTAINING PRE MRNA	1.1283e-49	0.23398	0.23751	1	1
3	REACTOME RIP MEDIATED NFKB ACTIVATION VIA DAI	8.9258e-09	0.23373	0.20931	1	1
3	REGULATION OF IMMUNE RESPONSE	0.0003791	0.23331	0.15765	1	1
3	TYROSINE PHOSPHORYLATION OF STAT PROTEIN	6.5163e-07	0.23317	0.20069	1	1
3	DNA RECOMBINATION	2.4438e-19	0.23286	0.18658	1	1
3	PID IL2 STAT5PATHWAY	0.00021313	0.23284	0.14582	1	1
3	REACTOME AUTODEGRADATION OF THE E3 UBIQUITIN LIGASE COP1	4.6027e-20	0.23271	0.20323	1	1
3	REACTOME RNA POL III TRANSCRIPTION TERMINATION	3.642e-40	0.23255	0.244	1	1
3	REACTOME MRNA SPLICING	3.0671e-44	0.23211	0.23418	1	1
3	REACTOME HOST INTERACTIONS OF HIV FACTORS	7.2675e-30	0.23204	0.19112	1	1
3	OLIGOSACCHARYL TRANSFERASE COMPLEX	7.7573e-23	0.23202	0.235	1	1
3	PID TCRCALCIUMPATHWAY	1.7029e-07	0.23181	0.16486	1	1
3	REACTOME CROSS PRESENTATION OF SOLUBLE EXOGENOUS ANTIGENS ENDOSOMES	4.8184e-17	0.23131	0.20168	1	1
3	REACTOME SMAD2 SMAD3 SMAD4 HETEROTRIMER REGULATES TRANSCRIPTION	2.4394e-27	0.23084	0.2368	1	1
3	SYNAPTOGENESIS	0.00014607	0.23036	0.23428	1	1
3	RNA POLYMERASE II TRANSCRIPTION MEDIATOR ACTIVITY	2.8211e-17	0.22988	0.22909	1	1
3	NUCLEAR PORE	1.0173e-37	0.2297	0.24904	1	1
3	BIOCARTA PROTEASOME PATHWAY	3.2087e-23	0.2296	0.21859	1	1
3	ST TUMOR NECROSIS FACTOR PATHWAY	2.3988e-10	0.22881	0.16781	1	1
3	REACTOME VIF MEDIATED DEGRADATION OF APOBEC3G	1.3896e-18	0.22624	0.20394	1	1
3	CELL FATE COMMITMENT	3.2581e-11	0.22611	0.19644	1	1
3	STRUCTURAL CONSTITUENT OF RIBOSOME	2.9319e-06	0.22574	0.20579	1	1
3	RESPONSE TO VIRUS	2.2506e-05	0.22512	0.1443	1	1
3	LEUKOCYTE ACTIVATION	0.00086237	0.22451	0.1597	1	1
3	REACTOME ANTIGEN PROCESSING CROSS PRESENTATION	2.8637e-13	0.22366	0.20444	1	1
3	ACUTE INFLAMMATORY RESPONSE	0.00053352	0.22286	0.29546	1	1
3	PID HIF1APATHWAY	6.2102e-28	0.22238	0.23366	1	1
3	REACTOME INFLUENZA LIFE CYCLE	2.2827e-13	0.2222	0.2215	1	1
3	REACTOME AUTODEGRADATION OF CDH1 BY CDH1 APC C	8.5179e-21	0.22122	0.19443	1	1
3	REACTOME TRANSPORT OF VITAMINS NUCLEOSIDES AND RELATED MOLECULES	1.3678e-21	0.22016	0.20947	1	1
3	THIOLESTER HYDROLASE ACTIVITY	6.2323e-30	0.21985	0.21584	1	1
3	ADP BINDING	4.6566e-06	0.21982	0.1862	1	1
3	REGULATION OF IMMUNE SYSTEM PROCESS	0.00049147	0.21973	0.15791	1	1
3	REACTOME SIGNAL REGULATORY PROTEIN SIRP FAMILY INTERACTIONS	8.6281e-05	0.21962	0.17979	1	1
3	KEGG SPLICEOSOME	4.879e-42	0.21911	0.22568	1	1
3	KEGG P53 SIGNALING PATHWAY	3.2524e-22	0.21881	0.18802	1	1
3	MRNA BINDING	3.2087e-41	0.21845	0.25754	1	1
3	3 5 EXONUCLEASE ACTIVITY	6.1028e-27	0.21842	0.19782	1	1
3	CONTRACTILE FIBER	2.8193e-05	0.21814	0.18779	1	1
3	POSITIVE REGULATION OF CELL MIGRATION	2.7997e-12	0.2178	0.24712	1	1
3	MRNA PROCESSING GO 0006397	1.6415e-55	0.21719	0.22897	1	1
3	NUCLEOBASENUCLEOSIDENUCLEOTIDE AND NUCLEIC ACID TRANSPORT	6.1493e-36	0.21657	0.20994	1	1
3	REACTOME CTLA4 INHIBITORY SIGNALING	4.3109e-11	0.21625	0.1869	1	1
3	PID FRA PATHWAY	2.1527e-05	0.21589	0.18812	1	1
3	KEGG FOLATE BIOSYNTHESIS	1.1643e-13	0.21558	0.22812	1	1
3	CYTOKINE AND CHEMOKINE MEDIATED SIGNALING PATHWAY	2.3639e-07	0.21484	0.2047	1	1
3	DNA METABOLIC PROCESS	1.0766e-37	0.21483	0.18693	1	1
3	REACTOME P75NTR RECRUITS SIGNALLING COMPLEXES	9.563e-17	0.21478	0.19761	1	1
3	BIOCARTA SALMONELLA PATHWAY	2.2294e-17	0.21437	0.22339	1	1
3	REACTOME ANTIGEN PRESENTATION FOLDING ASSEMBLY AND PEPTIDE LOADING OF CLASS I MHC	3.4455e-06	0.21428	0.16646	1	1
3	REACTOME REGULATION OF ORNITHINE DECARBOXYLASE ODC	1.3375e-14	0.21373	0.16878	1	1
3	REGULATION OF JNK ACTIVITY	1.1758e-15	0.21355	0.20721	1	1
3	CHROMOSOME ORGANIZATION AND BIOGENESIS	3.4748e-36	0.21277	0.21795	1	1
3	PID RANBP2PATHWAY	9.6048e-25	0.21105	0.18689	1	1
3	RESPONSE TO UV	9.5539e-27	0.21026	0.21904	1	1
3	PIGMENT METABOLIC PROCESS	8.3773e-22	0.21002	0.18157	1	1
3	ST B CELL ANTIGEN RECEPTOR	1.3945e-12	0.20973	0.18144	1	1
3	KEGG AMINOACYL TRNA BIOSYNTHESIS	7.5041e-36	0.20956	0.20281	1	1
3	REACTOME GLUCOSE TRANSPORT	3.163e-29	0.20944	0.18555	1	1
3	REACTOME PEPTIDE CHAIN ELONGATION	5.7102e-06	0.20901	0.20874	1	1
3	REGULATION OF CELL CYCLE	3.9332e-34	0.20875	0.20105	1	1
3	PID DNAPK PATHWAY	6.1627e-44	0.20831	0.19431	1	1
3	REACTOME 3 UTR MEDIATED TRANSLATIONAL REGULATION	2.3268e-08	0.20818	0.21797	1	1
3	POSITIVE REGULATION OF RESPONSE TO STIMULUS	1.3453e-05	0.20727	0.16322	1	1
3	NUCLEOLUS	2.7953e-45	0.20664	0.20733	1	1
3	KEGG RIBOSOME	5.575e-06	0.20645	0.20585	1	1
3	REACTOME REGULATION OF INSULIN SECRETION BY ACETYLCHOLINE	3.0195e-07	0.20607	0.20592	1	1
3	PROTEIN TARGETING TO MEMBRANE	4.9336e-24	0.20607	0.20452	1	1
3	KEGG GLYOXYLATE AND DICARBOXYLATE METABOLISM	7.8745e-22	0.20538	0.20418	1	1
3	POSITIVE REGULATION OF MULTICELLULAR ORGANISMAL PROCESS	0.0068384	0.20443	0.1036	1	1
3	CELLULAR PROTEIN COMPLEX DISASSEMBLY	4.1893e-28	0.20432	0.22272	1	1
3	REACTOME INFLUENZA VIRAL RNA TRANSCRIPTION AND REPLICATION	2.2046e-07	0.20367	0.20879	1	1
3	REACTOME NONSENSE MEDIATED DECAY ENHANCED BY THE EXON JUNCTION COMPLEX	9.3518e-09	0.20299	0.21617	1	1
3	NUCLEAR MEMBRANE PART	8.7209e-38	0.20241	0.20864	1	1
3	CELL ACTIVATION	0.00029272	0.20231	0.16754	1	1
3	TRANSLATION INITIATION FACTOR ACTIVITY	9.5113e-34	0.20229	0.19702	1	1
3	RIBONUCLEOPROTEIN COMPLEX	7.5967e-32	0.20229	0.20144	1	1
3	HOMEOSTASIS OF NUMBER OF CELLS	5.6087e-10	0.20169	0.16709	1	1
3	TRANSCRIPTION INITIATION FROM RNA POLYMERASE II PROMOTER	1.1273e-32	0.2012	0.20136	1	1
3	BIOCARTA CDMAC PATHWAY	1.1448e-09	0.20119	0.17595	1	1
3	STRUCTURE SPECIFIC DNA BINDING	1.5789e-51	0.20105	0.20954	1	1
3	B CELL DIFFERENTIATION	1.4546e-06	0.20067	0.16012	1	1
3	REACTOME NOD1 2 SIGNALING PATHWAY	2.0817e-14	0.20059	0.18622	1	1
3	REACTOME APOPTOTIC CLEAVAGE OF CELLULAR PROTEINS	8.2133e-17	0.20038	0.21245	1	1
3	REACTOME P75NTR SIGNALS VIA NFKB	8.9307e-16	0.20034	0.17176	1	1
3	REACTOME POST CHAPERONIN TUBULIN FOLDING PATHWAY	4.7539e-09	0.19933	0.18789	1	1
3	PID RB 1PATHWAY	3.3321e-26	0.19906	0.18702	1	1
3	REGULATION OF RESPONSE TO STIMULUS	4.1372e-05	0.1988	0.14057	1	1
3	SMALL CONJUGATING PROTEIN BINDING	1.6465e-12	0.19819	0.179	1	1
3	REACTOME APOPTOTIC EXECUTION PHASE	1.3111e-21	0.1973	0.19247	1	1
3	REACTOME DESTABILIZATION OF MRNA BY KSRP	7.5243e-26	0.19723	0.18599	1	1
3	REACTOME AMINO ACID TRANSPORT ACROSS THE PLASMA MEMBRANE	6.992e-12	0.19723	0.19917	1	1
3	POSITIVE REGULATION OF HYDROLASE ACTIVITY	1.4837e-12	0.19717	0.18505	1	1
3	REACTOME ABORTIVE ELONGATION OF HIV1 TRANSCRIPT IN THE ABSENCE OF TAT	1.4042e-23	0.196	0.19205	1	1
3	REACTOME METABOLISM OF RNA	3.5477e-21	0.19591	0.19394	1	1
3	NON MEMBRANE BOUND ORGANELLE	2.8409e-49	0.19565	0.19348	1	1
3	INTRACELLULAR NON MEMBRANE BOUND ORGANELLE	2.8409e-49	0.19565	0.19348	1	1
3	RNA SPLICING	3.9442e-45	0.1952	0.20073	1	1
3	REACTOME MRNA PROCESSING	9.8549e-45	0.19515	0.20649	1	1
3	MAINTENANCE OF LOCALIZATION	3.122e-10	0.19507	0.18252	1	1
3	APICAL PART OF CELL	3.0301e-07	0.1949	0.19759	1	1
3	CYTOKINE ACTIVITY	8.3404e-05	0.19484	0.14554	1	1
3	ANTIGEN BINDING	0.0046174	0.19456	0.10718	1	1
3	MRNA METABOLIC PROCESS	2.196e-54	0.1942	0.20264	1	1
3	CYTOSKELETAL PART	8.1768e-26	0.19368	0.18027	1	1
3	SPLICEOSOME	5.1749e-36	0.19303	0.20438	1	1
3	PID NFKAPPABCANONICALPATHWAY	2.0511e-10	0.19213	0.15579	1	1
3	GENERAL RNA POLYMERASE II TRANSCRIPTION FACTOR ACTIVITY	1.4635e-26	0.19176	0.18065	1	1
3	PID EPHRINBREVPATHWAY	2.0006e-07	0.19097	0.14007	1	1
3	REACTOME MRNA DECAY BY 5 TO 3 EXORIBONUCLEASE	5.5027e-28	0.19091	0.17079	1	1
3	KEGG LYSINE DEGRADATION	3.1641e-32	0.19024	0.19171	1	1
3	REACTOME VIRAL MESSENGER RNA SYNTHESIS	5.6266e-18	0.18983	0.18594	1	1
3	PROTEASOME COMPLEX	4.6875e-16	0.1898	0.15578	1	1
3	REACTOME AMINE COMPOUND SLC TRANSPORTERS	1.0585e-08	0.18962	0.19929	1	1
3	PEPTIDYL TYROSINE MODIFICATION	3.6821e-07	0.18958	0.14118	1	1
3	REACTOME PYRIMIDINE METABOLISM	1.8941e-16	0.18937	0.18417	1	1
3	CELLULAR COMPONENT DISASSEMBLY	7.9527e-22	0.18913	0.18685	1	1
3	REACTOME INHIBITION OF VOLTAGE GATED CA2 CHANNELS VIA GBETA GAMMA SUBUNITS	2.625e-10	0.18843	0.19388	1	1
3	DNA DIRECTED RNA POLYMERASE COMPLEX	6.1677e-31	0.18768	0.19393	1	1
3	NUCLEAR DNA DIRECTED RNA POLYMERASE COMPLEX	6.1709e-31	0.18768	0.19393	1	1
3	RNA POLYMERASE COMPLEX	6.1741e-31	0.18768	0.19393	1	1
3	REACTOME AMINO ACID AND OLIGOPEPTIDE SLC TRANSPORTERS	4.3125e-09	0.18764	0.1659	1	1
3	REACTOME MHC CLASS II ANTIGEN PRESENTATION	6.4497e-10	0.18757	0.13154	1	1
3	REACTOME REGULATORY RNA PATHWAYS	2.0876e-40	0.18636	0.18555	1	1
3	REACTOME OXYGEN DEPENDENT PROLINE HYDROXYLATION OF HYPOXIA INDUCIBLE FACTOR ALPHA	1.5594e-16	0.18529	0.17661	1	1
3	FEMALE GAMETE GENERATION	2.0606e-07	0.18494	0.15343	1	1
3	REACTOME TRANSLATION	9.4381e-10	0.1848	0.18965	1	1
3	REACTOME SRP DEPENDENT COTRANSLATIONAL PROTEIN TARGETING TO MEMBRANE	4.2659e-07	0.18475	0.18547	1	1
3	BIOCARTA ETS PATHWAY	3.8743e-10	0.18428	0.15309	1	1
3	BRUSH BORDER	1.0882e-07	0.18422	0.19486	1	1
3	CARBOHYDRATE TRANSMEMBRANE TRANSPORTER ACTIVITY	1.1504e-11	0.18331	0.1677	1	1
3	HYDRO LYASE ACTIVITY	2.4991e-07	0.18247	0.1261	1	1
3	REACTOME METABOLISM OF MRNA	9.2112e-15	0.18173	0.17586	1	1
3	REACTOME CHONDROITIN SULFATE BIOSYNTHESIS	0.00073086	0.18171	0.16016	1	1
3	RNA PROCESSING	4.5808e-50	0.18159	0.19024	1	1
3	CASPASE ACTIVATION	1.888e-11	0.18144	0.14825	1	1
3	REACTOME HIV LIFE CYCLE	1.4533e-49	0.18007	0.19721	1	1
3	PEPTIDYL TYROSINE PHOSPHORYLATION	4.5407e-09	0.18	0.16923	1	1
3	MAGNESIUM ION BINDING	2.9408e-22	0.17995	0.16449	1	1
3	BIOCARTA ACH PATHWAY	2.5429e-09	0.17968	0.14414	1	1
3	PROTEIN COMPLEX DISASSEMBLY	1.1427e-18	0.17943	0.18223	1	1
3	REACTOME ACTIVATION OF NF KAPPAB IN B CELLS	2.2797e-14	0.17902	0.13926	1	1
3	REACTOME RECYCLING PATHWAY OF L1	1.7039e-15	0.17882	0.18608	1	1
3	ORGANELLAR RIBOSOME	4.671e-09	0.17881	0.1769	1	1
3	MITOCHONDRIAL RIBOSOME	4.671e-09	0.17881	0.1769	1	1
3	SPERM MOTILITY	2.8097e-07	0.17852	0.19091	1	1
3	ADENYLATE CYCLASE ACTIVATION	2.0549e-05	0.1785	0.15409	1	1
3	REACTOME METABOLISM OF NUCLEOTIDES	2.0596e-23	0.17772	0.16535	1	1
3	NUCLEOBASENUCLEOSIDENUCLEOTIDE AND NUCLEIC ACID TRANSMEMBRANE TRANSPORTER ACTIVITY	1.251e-10	0.17686	0.17394	1	1
3	REACTOME HIV INFECTION	3.0627e-34	0.17668	0.16483	1	1
3	PROTEIN FOLDING	1.3165e-42	0.1764	0.18561	1	1
3	REACTOME SIGNALING BY ACTIVATED POINT MUTANTS OF FGFR1	3.6884e-05	0.17629	0.14898	1	1
3	ATP DEPENDENT HELICASE ACTIVITY	9.3435e-16	0.17628	0.14667	1	1
3	REACTOME ANTIVIRAL MECHANISM BY IFN STIMULATED GENES	2.1978e-15	0.1759	0.14895	1	1
3	REACTOME ACTIVATED TAK1 MEDIATES P38 MAPK ACTIVATION	1.1706e-21	0.17559	0.18696	1	1
3	KEGG BASAL TRANSCRIPTION FACTORS	1.2392e-30	0.17487	0.2015	1	1
3	CENTRAL NERVOUS SYSTEM DEVELOPMENT	5.8604e-09	0.17427	0.16988	1	1
3	PORE COMPLEX	3.7124e-28	0.17393	0.18256	1	1
3	REACTOME GLYCOLYSIS	4.8724e-16	0.17372	0.17589	1	1
3	REACTOME REGULATION OF APOPTOSIS	2.1027e-18	0.17365	0.16152	1	1
3	RNA BINDING	1.578e-30	0.17346	0.171	1	1
3	CARBOHYDRATE KINASE ACTIVITY	5.3025e-14	0.1732	0.15497	1	1
3	REACTOME PYRUVATE METABOLISM AND CITRIC ACID TCA CYCLE	1.5018e-25	0.17269	0.15394	1	1
3	REACTOME ADAPTIVE IMMUNE SYSTEM	4.5464e-06	0.17263	0.098154	1	1
3	TRANSCRIPTION FACTOR COMPLEX	2.8549e-54	0.17236	0.1781	1	1
3	GENE SILENCING	2.9057e-28	0.17217	0.18406	1	1
3	LEUKOCYTE DIFFERENTIATION	0.00036173	0.17167	0.1316	1	1
3	STRUCTURAL MOLECULE ACTIVITY	6.45e-12	0.17157	0.17359	1	1
3	REACTOME FORMATION OF ATP BY CHEMIOSMOTIC COUPLING	3.978e-06	0.17156	0.16645	1	1
3	REACTOME PROCESSING OF INTRONLESS PRE MRNAS	1.4843e-25	0.1715	0.18444	1	1
3	RESPONSE TO HYPOXIA	9.5839e-13	0.17089	0.15398	1	1
3	NEGATIVE REGULATION OF TRANSCRIPTION FACTOR ACTIVITY	2.2292e-06	0.17081	0.15188	1	1
3	RIBONUCLEOPROTEIN BINDING	4.9382e-21	0.17055	0.17353	1	1
3	PID EPHBFWDPATHWAY	2.1856e-17	0.17003	0.16604	1	1
3	REACTOME RNA POL II TRANSCRIPTION	3.1791e-43	0.16983	0.18331	1	1
3	REACTOME DEADENYLATION DEPENDENT MRNA DECAY	1.7736e-37	0.16966	0.17247	1	1
3	REACTOME RNA POL III TRANSCRIPTION INITIATION FROM TYPE 2 PROMOTER	5.077e-29	0.16798	0.16951	1	1
3	APOPTOTIC NUCLEAR CHANGES	1.5041e-13	0.16794	0.17024	1	1
3	CYTOSKELETON	1.1128e-19	0.16787	0.15259	1	1
3	REACTOME PURINE SALVAGE	4.0052e-10	0.16781	0.14319	1	1
3	ST FAS SIGNALING PATHWAY	6.984e-18	0.16763	0.14835	1	1
3	REACTOME LATE PHASE OF HIV LIFE CYCLE	2.829e-44	0.16737	0.1801	1	1
3	REACTOME APOPTOSIS	2.298e-28	0.16675	0.14977	1	1
3	RNA HELICASE ACTIVITY	2.3406e-19	0.1661	0.17153	1	1
3	MICROTUBULE BASED PROCESS	1.3334e-20	0.16587	0.15447	1	1
3	MEDIATOR COMPLEX	3.2878e-28	0.16571	0.16662	1	1
3	REACTOME TRANSCRIPTIONAL ACTIVITY OF SMAD2 SMAD3 SMAD4 HETEROTRIMER	1.1431e-18	0.16566	0.17495	1	1
3	REGULATION OF ACTION POTENTIAL	4.7659e-08	0.16537	0.18148	1	1
3	REACTOME RNA POL III TRANSCRIPTION	2.0344e-35	0.16485	0.17194	1	1
3	BIOCARTA PARKIN PATHWAY	5.6682e-07	0.1646	0.13187	1	1
3	POSITIVE REGULATION OF CASPASE ACTIVITY	3.4382e-08	0.16413	0.14018	1	1
3	SECONDARY ACTIVE TRANSMEMBRANE TRANSPORTER ACTIVITY	8.3717e-11	0.1636	0.14965	1	1
3	REACTOME REGULATION OF MRNA STABILITY BY PROTEINS THAT BIND AU RICH ELEMENTS	5.7477e-22	0.16337	0.15329	1	1
3	BIOCARTA SODD PATHWAY	0.00078103	0.16284	0.10944	1	1
3	KEGG GLYCOSPHINGOLIPID BIOSYNTHESIS GLOBO SERIES	7.1146e-05	0.16166	0.10732	1	1
3	CELL PROLIFERATION GO 0008283	1.1676e-12	0.16077	0.14793	1	1
3	REACTOME PLATELET SENSITIZATION BY LDL	2.0943e-12	0.16072	0.13688	1	1
3	REACTOME FACILITATIVE NA INDEPENDENT GLUCOSE TRANSPORTERS	1.6872e-05	0.15982	0.13606	1	1
3	CARBON OXYGEN LYASE ACTIVITY	2.6628e-08	0.15903	0.12578	1	1
3	ST PHOSPHOINOSITIDE 3 KINASE PATHWAY	3.4574e-13	0.15892	0.13634	1	1
3	RESPONSE TO DNA DAMAGE STIMULUS	3.3984e-27	0.15842	0.13756	1	1
3	NUCLEAR MEMBRANE	1.1072e-23	0.15782	0.16132	1	1
3	NUCLEAR PART	1.8259e-46	0.15673	0.15443	1	1
3	REACTOME SIGNALING BY TGF BETA RECEPTOR COMPLEX	1.2726e-22	0.15631	0.14601	1	1
3	SPLICEOSOME ASSEMBLY	2.7385e-21	0.15558	0.15884	1	1
3	SULFUR COMPOUND BIOSYNTHETIC PROCESS	3.7528e-06	0.15528	0.13271	1	1
3	REGULATION OF HYDROLASE ACTIVITY	9.7924e-12	0.15494	0.15022	1	1
3	TRNA PROCESSING	1.2348e-14	0.15438	0.13503	1	1
3	REACTOME RNA POL III CHAIN ELONGATION	3.9858e-18	0.15265	0.1554	1	1
3	PHOSPHATASE INHIBITOR ACTIVITY	9.4649e-05	0.15259	0.2004	1	1
3	PID ILK PATHWAY	2.2334e-15	0.15257	0.1545	1	1
3	KEGG EPITHELIAL CELL SIGNALING IN HELICOBACTER PYLORI INFECTION	1.0799e-15	0.15206	0.14992	1	1
3	S ADENOSYLMETHIONINE DEPENDENT METHYLTRANSFERASE ACTIVITY	4.1405e-14	0.15193	0.14517	1	1
3	REGULATION OF INTRACELLULAR TRANSPORT	2.7931e-07	0.15187	0.12697	1	1
3	REACTOME G ALPHA I SIGNALLING EVENTS	0.00013759	0.15183	0.11996	1	1
3	REACTOME MITOCHONDRIAL TRNA AMINOACYLATION	1.4861e-19	0.15158	0.15871	1	1
3	PHOSPHOINOSITIDE MEDIATED SIGNALING	1.0298e-05	0.15112	0.13018	1	1
3	DNA CATABOLIC PROCESS	1.9918e-16	0.15097	0.16959	1	1
3	COENZYME BIOSYNTHETIC PROCESS	6.9114e-11	0.15054	0.15533	1	1
3	KEGG NON SMALL CELL LUNG CANCER	2.0717e-14	0.15037	0.14388	1	1
3	REACTOME IL 2 SIGNALING	0.00114	0.14995	0.086557	1	1
3	KEGG RNA DEGRADATION	8.0264e-39	0.14985	0.16351	1	1
3	POSITIVE REGULATION OF CELL PROLIFERATION	5.4269e-06	0.14981	0.12119	1	1
3	REACTOME SIGNALING BY HIPPO	1.9456e-10	0.14959	0.18591	1	1
3	APOPTOTIC PROGRAM	2.2386e-13	0.14955	0.13222	1	1
3	MITOCHONDRIAL SMALL RIBOSOMAL SUBUNIT	1.5951e-09	0.14901	0.15375	1	1
3	SMALL RIBOSOMAL SUBUNIT	1.5955e-09	0.14901	0.15375	1	1
3	ORGANELLAR SMALL RIBOSOMAL SUBUNIT	1.5955e-09	0.14901	0.15375	1	1
3	MACROMOLECULAR COMPLEX DISASSEMBLY	1.0634e-14	0.14883	0.1472	1	1
3	APICAL PLASMA MEMBRANE	3.4932e-05	0.14859	0.16783	1	1
3	NUCLEASE ACTIVITY	1.044e-20	0.14832	0.13091	1	1
3	RNA SPLICINGVIA TRANSESTERIFICATION REACTIONS	1.306e-24	0.14794	0.15063	1	1
3	RIBOSOMAL SUBUNIT	2.0772e-06	0.14791	0.14702	1	1
3	TRANSLATION FACTOR ACTIVITY NUCLEIC ACID BINDING	1.2526e-28	0.14784	0.15918	1	1
3	KEGG CYTOSOLIC DNA SENSING PATHWAY	0.00014649	0.14763	0.096993	1	1
3	KEGG PENTOSE PHOSPHATE PATHWAY	1.0125e-16	0.14739	0.14356	1	1
3	BIOCARTA IL2 PATHWAY	0.002743	0.14732	0.093085	1	1
3	REACTOME SIGNALING BY WNT	1.7137e-15	0.14665	0.12562	1	1
3	ANION TRANSPORT	1.1498e-09	0.14629	0.17195	1	1
3	METHYLTRANSFERASE ACTIVITY	1.0885e-20	0.14629	0.15631	1	1
3	ONE CARBON COMPOUND METABOLIC PROCESS	2.9501e-20	0.1461	0.14122	1	1
3	REACTOME SIGNALING BY THE B CELL RECEPTOR BCR	5.9086e-12	0.14604	0.11422	1	1
3	ENDONUCLEASE ACTIVITY	6.3107e-29	0.1456	0.16506	1	1
3	KEGG PYRIMIDINE METABOLISM	1.2678e-26	0.14541	0.14262	1	1
3	BIOCARTA ARENRF2 PATHWAY	6.4207e-05	0.14433	0.12628	1	1
3	PHOSPHATE TRANSMEMBRANE TRANSPORTER ACTIVITY	4.5518e-05	0.1432	0.13103	1	1
3	TRANSLATION REGULATOR ACTIVITY	1.0162e-26	0.14299	0.14661	1	1
3	REACTOME REGULATION OF SIGNALING BY CBL	0.00025162	0.14272	0.09927	1	1
3	TRANSLATION	4.9715e-14	0.14234	0.13825	1	1
3	SINGLE STRANDED DNA BINDING	2.07e-25	0.14179	0.14315	1	1
3	REACTOME ELONGATION ARREST AND RECOVERY	3.6597e-22	0.14102	0.14122	1	1
3	PID PRLSIGNALINGEVENTSPATHWAY	4.1841e-11	0.14093	0.12431	1	1
3	FEEDING BEHAVIOR	3.8042e-08	0.14085	0.1597	1	1
3	DNA DAMAGE RESPONSESIGNAL TRANSDUCTION BY P53 CLASS MEDIATOR	6.9058e-12	0.13942	0.12759	1	1
3	KEGG BASAL CELL CARCINOMA	2.4524e-06	0.13857	0.14428	1	1
3	ACETYLCHOLINE BINDING	2.501e-05	0.13845	0.16293	1	1
3	REGULATION OF PROTEIN IMPORT INTO NUCLEUS	0.00012715	0.13802	0.11973	1	1
3	CELL CYCLE ARREST GO 0007050	9.7962e-13	0.13755	0.1309	1	1
3	ANTI APOPTOSIS	8.1676e-12	0.13652	0.11413	1	1
3	PID TCRRASPATHWAY	6.237e-05	0.13644	0.097713	1	1
3	HETEROCYCLE METABOLIC PROCESS	5.5806e-11	0.13551	0.10823	1	1
3	VACUOLAR PART	3.4336e-07	0.13512	0.13732	1	1
3	KEGG VIBRIO CHOLERAE INFECTION	2.4203e-13	0.13474	0.10946	1	1
3	RIBONUCLEOPROTEIN COMPLEX BIOGENESIS AND ASSEMBLY	3.6512e-21	0.13457	0.12878	1	1
3	BETA TUBULIN BINDING	1.2599e-15	0.13435	0.11776	1	1
3	SIGNAL SEQUENCE BINDING	5.7323e-18	0.13433	0.13456	1	1
3	KEGG GLYCOSPHINGOLIPID BIOSYNTHESIS GANGLIO SERIES	9.1374e-05	0.1331	0.11444	1	1
3	EMBRYONIC MORPHOGENESIS	7.8383e-05	0.13299	0.12215	1	1
3	NUCLEAR IMPORT	6.6245e-12	0.13257	0.11092	1	1
3	REACTOME TGF BETA RECEPTOR SIGNALING ACTIVATES SMADS	4.9847e-20	0.13211	0.13186	1	1
3	REGULATION OF APOPTOSIS	6.4363e-07	0.1309	0.085415	1	1
3	REACTOME MITOCHONDRIAL PROTEIN IMPORT	2.2868e-08	0.1306	0.11958	1	1
3	REACTOME CELL CELL COMMUNICATION	5.5342e-07	0.13003	0.12043	1	1
3	TUBULIN BINDING	1.3034e-16	0.12965	0.13576	1	1
3	REACTOME LATENT INFECTION OF HOMO SAPIENS WITH MYCOBACTERIUM TUBERCULOSIS	5.637e-07	0.12917	0.12491	1	1
3	PID IL1PATHWAY	1.6357e-05	0.12874	0.099285	1	1
3	COENZYME METABOLIC PROCESS	1.1303e-09	0.12868	0.11269	1	1
3	MITOCHONDRION ORGANIZATION AND BIOGENESIS	4.9124e-10	0.12756	0.1375	1	1
3	BIOCARTA CCR3 PATHWAY	2.9192e-06	0.12752	0.10059	1	1
3	TRANSFERASE ACTIVITY TRANSFERRING GLYCOSYL GROUPS	7.4914e-20	0.12752	0.13343	1	1
3	RIBOSOME	1.2516e-08	0.12742	0.15287	1	1
3	TRANSCRIPTION FACTOR TFIID COMPLEX	2.2084e-25	0.12736	0.14069	1	1
3	NUCLEAR LUMEN	1.348e-39	0.1262	0.13063	1	1
3	PID RAC1 PATHWAY	1.5934e-10	0.12601	0.10626	1	1
3	BIOCARTA AGR PATHWAY	6.366e-07	0.12546	0.14674	1	1
3	SA CASPASE CASCADE	0.015274	0.12533	0.081734	1	1
3	REACTOME IRAK1 RECRUITS IKK COMPLEX	2.5868e-08	0.12524	0.14288	1	1
3	REGULATION OF CELL PROLIFERATION	7.3836e-08	0.12487	0.11905	1	1
3	TRANSFERASE ACTIVITY TRANSFERRING ONE CARBON GROUPS	4.7703e-15	0.12444	0.12423	1	1
3	RECEPTOR SIGNALING PROTEIN SERINE THREONINE KINASE ACTIVITY	3.7662e-08	0.12435	0.11454	1	1
3	REGULATION OF CELL ADHESION	0.005129	0.12408	0.076748	1	1
3	MEMBRANE ENCLOSED LUMEN	2.8346e-42	0.12357	0.12564	1	1
3	ORGANELLE LUMEN	2.8346e-42	0.12357	0.12564	1	1
3	REGULATION OF PROGRAMMED CELL DEATH	1.9107e-06	0.12318	0.081163	1	1
3	PERIPHERAL NERVOUS SYSTEM DEVELOPMENT	0.0032724	0.12248	0.13108	1	1
3	CHAPERONE BINDING	1.626e-09	0.12223	0.11971	1	1
3	RNA EXPORT FROM NUCLEUS	2.4494e-14	0.12214	0.12897	1	1
3	NUCLEAR ORGANIZATION AND BIOGENESIS	6.1381e-16	0.12207	0.1301	1	1
3	DEOXYRIBONUCLEASE ACTIVITY	7.6753e-12	0.12116	0.12465	1	1
3	REACTOME UNFOLDED PROTEIN RESPONSE	1.0632e-22	0.12081	0.11723	1	1
3	INTRACELLULAR ORGANELLE PART	2.7739e-43	0.11963	0.11688	1	1
3	BIOCARTA CELL2CELL PATHWAY	7.7805e-05	0.11932	0.10329	1	1
3	KEGG GLIOMA	1.7237e-06	0.116	0.10579	1	1
3	REGULATION OF TRANSLATION	2.9166e-05	0.11575	0.080379	1	1
3	ORGANELLE PART	5.5606e-43	0.11565	0.11569	1	1
3	ISOMERASE ACTIVITY	3.5636e-10	0.11441	0.10485	1	1
3	PROTEIN IMPORT INTO NUCLEUS	6.5151e-09	0.11429	0.096965	1	1
3	CELLULAR BIOSYNTHETIC PROCESS	1.3528e-18	0.11417	0.12222	1	1
3	SENSORY ORGAN DEVELOPMENT	0.0015924	0.11405	0.10284	1	1
3	TRIACYLGLYCEROL METABOLIC PROCESS	0.0047058	0.11373	0.11075	1	1
3	REACTOME IL1 SIGNALING	1.6096e-06	0.11367	0.10416	1	1
3	NEGATIVE REGULATION OF APOPTOSIS	3.0088e-07	0.11292	0.0837	1	1
3	REACTOME SYNTHESIS OF VERY LONG CHAIN FATTY ACYL COAS	0.0019231	0.11209	0.10785	1	1
3	REACTOME TCA CYCLE AND RESPIRATORY ELECTRON TRANSPORT	3.2848e-05	0.1118	0.094166	1	1
3	REACTOME G PROTEIN ACTIVATION	5.0495e-06	0.11062	0.10938	1	1
3	REACTOME TERMINATION OF O GLYCAN BIOSYNTHESIS	0.010023	0.11061	0.11396	1	1
3	REACTOME RNA POL II PRE TRANSCRIPTION EVENTS	2.2659e-21	0.11031	0.11365	1	1
3	PEPTIDYL AMINO ACID MODIFICATION	9.5215e-08	0.10995	0.094486	1	1
3	REACTOME RNA POL III TRANSCRIPTION INITIATION FROM TYPE 3 PROMOTER	1.7293e-12	0.10994	0.10431	1	1
3	INORGANIC ANION TRANSMEMBRANE TRANSPORTER ACTIVITY	0.00070118	0.10986	0.087175	1	1
3	SECONDARY METABOLIC PROCESS	1.975e-05	0.10731	0.073188	1	1
3	REACTOME TIGHT JUNCTION INTERACTIONS	0.00015726	0.10701	0.14156	1	1
3	REACTOME DOWNREGULATION OF SMAD2 3 SMAD4 TRANSCRIPTIONAL ACTIVITY	1.9712e-07	0.10601	0.08545	1	1
3	CARBOHYDRATE TRANSPORT	1.9923e-05	0.10594	0.10725	1	1
3	TUBE MORPHOGENESIS	6.8698e-05	0.10534	0.10878	1	1
3	REGULATION OF CELL SHAPE	0.0089003	0.10426	0.06652	1	1
3	KEGG WNT SIGNALING PATHWAY	5.1694e-07	0.10399	0.10322	1	1
3	PROTEIN KINASE INHIBITOR ACTIVITY	0.036544	0.10342	0.051071	1	1
3	NEGATIVE REGULATION OF PROGRAMMED CELL DEATH	4.4133e-06	0.10242	0.074082	1	1
3	CYSTEINE TYPE ENDOPEPTIDASE ACTIVITY	1.0469e-08	0.10181	0.11834	1	1
3	TRANSFERASE ACTIVITY TRANSFERRING HEXOSYL GROUPS	2.0094e-08	0.10176	0.089773	1	1
3	VACUOLAR MEMBRANE	0.0057473	0.10154	0.072619	1	1
3	REACTOME CITRIC ACID CYCLE TCA CYCLE	2.7526e-07	0.10145	0.090579	1	1
3	REACTOME DOWNSTREAM SIGNALING EVENTS OF B CELL RECEPTOR BCR	1.5031e-10	0.10144	0.074459	1	1
3	KEGG SELENOAMINO ACID METABOLISM	4.4727e-06	0.1014	0.082651	1	1
3	REACTOME REGULATION OF IFNA SIGNALING	9.2099e-07	0.10002	0.087656	1	1
3	REACTOME INSULIN RECEPTOR RECYCLING	4.6104e-06	0.099413	0.083559	1	1
3	PID RAS PATHWAY	0.0016719	0.097933	0.088597	1	1
3	REACTOME METABOLISM OF CARBOHYDRATES	5.6277e-10	0.097821	0.10594	1	1
3	KEGG VALINE LEUCINE AND ISOLEUCINE BIOSYNTHESIS	1.0004e-08	0.097645	0.098319	1	1
3	RESPONSE TO TEMPERATURE STIMULUS	7.9297e-10	0.097613	0.1002	1	1
3	PID CASPASE PATHWAY	0.00059095	0.096867	0.054433	1	1
3	ST GA13 PATHWAY	1.2251e-05	0.096553	0.074583	1	1
3	REACTOME PRE NOTCH TRANSCRIPTION AND TRANSLATION	2.1046e-06	0.096059	0.10642	1	1
3	OXIDOREDUCTASE ACTIVITY ACTING ON NADH OR NADPH	0.00021105	0.095764	0.077523	1	1
3	BIOPOLYMER CATABOLIC PROCESS	2.521e-21	0.09522	0.088734	1	1
3	CELL PROJECTION BIOGENESIS	0.00046374	0.094332	0.075722	1	1
3	KEGG ADHERENS JUNCTION	1.0472e-05	0.094064	0.08676	1	1
3	SENSORY PERCEPTION	1.891e-06	0.092625	0.080502	1	1
3	PID MTOR 4PATHWAY	1.6837e-19	0.092412	0.093378	1	1
3	PID ARF6DOWNSTREAMPATHWAY	2.7012e-07	0.091907	0.092939	1	1
3	REACTOME DESTABILIZATION OF MRNA BY TRISTETRAPROLIN TTP	4.9446e-11	0.091571	0.095369	1	1
3	BIOCARTA MEF2D PATHWAY	0.00032998	0.091383	0.07384	1	1
3	MITOCHONDRIAL INNER MEMBRANE	0.0013134	0.09135	0.070911	1	1
3	HEMATOPOIETIN INTERFERON CLASSD200 DOMAIN CYTOKINE RECEPTOR BINDING	0.00010408	0.091245	0.078717	1	1
3	REACTOME CLASS I MHC MEDIATED ANTIGEN PROCESSING PRESENTATION	4.4482e-11	0.090729	0.072006	1	1
3	ORGANELLE INNER MEMBRANE	9.034e-05	0.090594	0.07891	1	1
3	ORGANELLE ORGANIZATION AND BIOGENESIS	2.3002e-13	0.08927	0.072414	1	1
3	BIOCARTA RHO PATHWAY	2.1399e-06	0.089228	0.091023	1	1
3	REACTOME REGULATION OF GENE EXPRESSION IN BETA CELLS	0.0091873	0.088585	0.096456	1	1
3	REGULATION OF CATALYTIC ACTIVITY	6.8963e-07	0.086764	0.080924	1	1
3	NUCLEOBASENUCLEOSIDENUCLEOTIDE AND NUCLEIC ACID METABOLIC PROCESS	8.7644e-18	0.086088	0.083125	1	1
3	LIPID BIOSYNTHETIC PROCESS	9.2143e-13	0.085684	0.098396	1	1
3	REACTOME EGFR DOWNREGULATION	1.748e-07	0.085579	0.087609	1	1
3	APOPTOSIS GO	7.601e-05	0.084816	0.063137	1	1
3	ENVELOPE	2.2977e-18	0.084182	0.090807	1	1
3	ORGANELLE ENVELOPE	2.2986e-18	0.084182	0.090807	1	1
3	KEGG OXIDATIVE PHOSPHORYLATION	0.0037738	0.082532	0.070704	1	1
3	SENSORY PERCEPTION OF TASTE	0.00064671	0.0813	0.12892	1	1
3	REACTOME RESPIRATORY ELECTRON TRANSPORT	0.027668	0.081183	0.068982	1	1
3	COFACTOR BIOSYNTHETIC PROCESS	3.6761e-07	0.080543	0.070432	1	1
3	REACTOME NOTCH1 INTRACELLULAR DOMAIN REGULATES TRANSCRIPTION	1.7098e-11	0.080502	0.10618	1	1
3	BIOCARTA PTDINS PATHWAY	2.7649e-09	0.080404	0.07956	1	1
3	KEGG CITRATE CYCLE TCA CYCLE	4.4319e-05	0.079867	0.082872	1	1
3	TRANSCRIPTION FACTOR BINDING	1.0287e-11	0.079106	0.076485	1	1
3	RNA METABOLIC PROCESS	3.6548e-15	0.078932	0.079783	1	1
3	TRANSCRIPTION FROM RNA POLYMERASE III PROMOTER	7.4769e-08	0.077626	0.086311	1	1
3	REACTOME SPRY REGULATION OF FGF SIGNALING	3.8272e-08	0.077462	0.081988	1	1
3	DEVELOPMENT OF PRIMARY SEXUAL CHARACTERISTICS	0.0036231	0.077335	0.060029	1	1
3	TRANSCRIPTION FROM RNA POLYMERASE II PROMOTER	1.6227e-08	0.076311	0.068222	1	1
3	REACTOME SIGNALING BY SCF KIT	0.00060522	0.075751	0.045693	1	1
3	MITOCHONDRIAL MATRIX	0.0013454	0.075302	0.061879	1	1
3	MITOCHONDRIAL LUMEN	0.0013458	0.075302	0.061879	1	1
3	MACROMOLECULE CATABOLIC PROCESS	2.8553e-15	0.073596	0.06733	1	1
3	PROTEIN IMPORT	2.4205e-07	0.072967	0.064186	1	1
3	REACTOME CELL CELL JUNCTION ORGANIZATION	0.014997	0.072916	0.067446	1	1
3	MITOCHONDRIAL MEMBRANE PART	0.0082407	0.072556	0.062117	1	1
3	BIOSYNTHETIC PROCESS	4.2958e-10	0.072448	0.073115	1	1
3	REACTOME GABA RECEPTOR ACTIVATION	0.0064423	0.072421	0.087322	1	1
3	PROTEIN KINASE BINDING	0.0024568	0.07114	0.050156	1	1
3	REGULATION OF MOLECULAR FUNCTION	0.00031067	0.067797	0.057104	1	1
3	BIOCARTA ARAP PATHWAY	5.3191e-05	0.065488	0.078925	1	1
3	MITOCHONDRIAL MEMBRANE	0.0098266	0.062761	0.04573	1	1
3	REACTOME METABOLISM OF PROTEINS	2.2409e-06	0.061886	0.062806	1	1
3	REACTOME GLUCOSE METABOLISM	0.00018333	0.061805	0.050547	1	1
3	REPRODUCTIVE PROCESS	0.00010873	0.061498	0.05768	1	1
3	BIOCARTA ETC PATHWAY	0.00074153	0.060173	0.077199	1	1
3	BIOCARTA RNA PATHWAY	0.0071606	0.05966	0.065043	1	1
3	DNA DIRECTED RNA POLYMERASEII CORE COMPLEX	0.00032496	0.059525	0.075635	1	1
3	SMALL GTPASE BINDING	0.0055825	0.059236	0.037442	1	1
3	REACTOME TIE2 SIGNALING	0.0085353	0.057553	0.063512	1	1
3	CELLULAR RESPIRATION	0.0077742	0.056621	0.070962	1	1
3	HISTONE DEACETYLASE COMPLEX	0.00011044	0.0551	0.042646	1	1
3	REACTOME LYSOSOME VESICLE BIOGENESIS	0.0067748	0.054435	0.034303	1	1
3	REACTOME ACTIVATION OF CHAPERONE GENES BY XBP1S	0.0027204	0.048145	0.033329	1	1
3	RAS GTPASE BINDING	0.00012628	0.047908	0.061145	1	1
3	PROTEIN TARGETING	1.1825e-05	0.047879	0.040413	1	1
3	REACTOME SLC MEDIATED TRANSMEMBRANE TRANSPORT	0.0085721	0.045917	0.048016	1	1
3	TRANSCRIPTION COFACTOR ACTIVITY	1.4395e-06	0.045586	0.052945	1	1
3	CELL CORTEX PART	0.073275	0.043796	0.03571	1	1
3	MEMBRANE LIPID BIOSYNTHETIC PROCESS	0.00010673	0.043019	0.044721	1	1
4	REACTOME TRANSLOCATION OF ZAP 70 TO IMMUNOLOGICAL SYNAPSE	3.2063e-52	1.9148	1.9015	1	1
4	REACTOME PD1 SIGNALING	1.4708e-57	1.8156	1.7984	1	1
4	BIOCARTA CTL PATHWAY	9.0191e-61	1.7929	1.8154	1	1
4	REACTOME PHOSPHORYLATION OF CD3 AND TCR ZETA CHAINS	4.0535e-55	1.7716	1.7545	1	1
4	BIOCARTA BLYMPHOCYTE PATHWAY	8.0505e-60	1.765	1.7904	1	1
4	BIOCARTA TCYTOTOXIC PATHWAY	1.5328e-54	1.7503	1.8006	1	1
4	BIOCARTA THELPER PATHWAY	1.5159e-55	1.7495	1.7571	1	1
4	BIOCARTA TCRA PATHWAY	4.5022e-52	1.7451	1.7599	1	1
4	KEGG GRAFT VERSUS HOST DISEASE	2.7121e-64	1.557	1.5642	1	1
4	KEGG ALLOGRAFT REJECTION	3.0376e-60	1.5149	1.4761	1	1
4	BIOCARTA NO2IL12 PATHWAY	7.4692e-52	1.4858	1.491	1	1
4	BIOCARTA CTLA4 PATHWAY	2.6104e-59	1.4697	1.4535	1	1
4	REACTOME GENERATION OF SECOND MESSENGER MOLECULES	2.0409e-54	1.373	1.3709	1	1
4	BIOCARTA ASBCELL PATHWAY	1.1953e-61	1.3556	1.389	1	1
4	BIOCARTA IL17 PATHWAY	2.2043e-56	1.3406	1.3167	1	1
4	IMMUNOLOGICAL SYNAPSE	4.37e-41	1.3244	1.2745	1	1
4	BIOCARTA TH1TH2 PATHWAY	5.326e-60	1.256	1.2425	1	1
4	INTERLEUKIN RECEPTOR ACTIVITY	2.0055e-61	1.2268	1.2637	1	1
4	SA MMP CYTOKINE CONNECTION	5.7296e-63	1.1938	1.2223	1	1
4	REACTOME IMMUNOREGULATORY INTERACTIONS BETWEEN A LYMPHOID AND A NON LYMPHOID CELL	6.2863e-56	1.1896	1.1791	1	1
4	KEGG INTESTINAL IMMUNE NETWORK FOR IGA PRODUCTION	6.6671e-51	1.1685	1.1013	1	1
4	BIOCARTA LYM PATHWAY	1.0734e-61	1.1673	1.2228	1	1
4	BIOCARTA NKT PATHWAY	7.1202e-57	1.1617	1.1471	1	1
4	REACTOME CHEMOKINE RECEPTORS BIND CHEMOKINES	1.0951e-47	1.1522	1.1111	1	1
4	KEGG TYPE I DIABETES MELLITUS	3.0918e-57	1.1483	1.1846	1	1
4	BIOCARTA IL12 PATHWAY	8.077e-54	1.145	1.1846	1	1
4	REACTOME INTERFERON GAMMA SIGNALING	1.5508e-68	1.1412	1.1183	1	1
4	KEGG PRIMARY IMMUNODEFICIENCY	4.1057e-46	1.1077	1.0616	1	1
4	BIOCARTA MONOCYTE PATHWAY	1.0862e-46	1.0994	1.1307	1	1
4	CHEMOKINE ACTIVITY	1.1665e-44	1.0985	1.0995	1	1
4	INTERLEUKIN BINDING	2.9322e-58	1.0956	1.1198	1	1
4	CHEMOKINE RECEPTOR BINDING	1.2863e-45	1.0949	1.1204	1	1
4	KEGG ASTHMA	2.7604e-50	1.0946	1.12	1	1
4	BIOCARTA GRANULOCYTES PATHWAY	6.6404e-51	1.0891	1.1836	1	1
4	PID IL12 STAT4PATHWAY	1.7843e-60	1.0776	1.1011	1	1
4	BIOCARTA IL5 PATHWAY	1.8862e-49	1.0612	1.0295	1	1
4	LEUKOCYTE CHEMOTAXIS	4.5548e-51	1.0382	1.009	1	1
4	PID IL12 2PATHWAY	5.4868e-56	1.0037	1.0307	1	1
4	KEGG AUTOIMMUNE THYROID DISEASE	1.1696e-57	0.99187	0.95895	1	1
4	KEGG LEISHMANIA INFECTION	4.9273e-64	0.98834	0.98861	1	1
4	REACTOME IL 6 SIGNALING	6.5566e-68	0.97257	0.97817	1	1
4	CELLULAR DEFENSE RESPONSE	7.719e-59	0.97094	0.99183	1	1
4	ADAPTIVE IMMUNE RESPONSE GO 0002460	1.4659e-55	0.96659	0.98035	1	1
4	BIOCARTA LAIR PATHWAY	5.0458e-40	0.96492	1.0444	1	1
4	BIOCARTA DC PATHWAY	4.8564e-53	0.94669	0.96692	1	1
4	PID IL27PATHWAY	5.0273e-58	0.94122	0.9394	1	1
4	ADAPTIVE IMMUNE RESPONSE	1.2369e-56	0.93652	0.95797	1	1
4	LOCOMOTORY BEHAVIOR	1.0525e-55	0.9327	0.93965	1	1
4	BIOCARTA INFLAM PATHWAY	3.8622e-60	0.93242	0.96441	1	1
4	BIOCARTA TOB1 PATHWAY	9.6831e-54	0.93223	0.90945	1	1
4	BIOCARTA CLASSIC PATHWAY	4.9694e-28	0.91986	0.90989	1	1
4	T CELL ACTIVATION	4.8774e-48	0.91396	0.88138	1	1
4	PID IL23PATHWAY	3.2528e-60	0.90841	0.92502	1	1
4	INTERFERON GAMMA PRODUCTION	1.1738e-55	0.90711	0.91315	1	1
4	G PROTEIN COUPLED RECEPTOR BINDING	9.0908e-42	0.89887	0.89916	1	1
4	REACTOME TCR SIGNALING	5.9075e-57	0.89325	0.88628	1	1
4	INTERFERON GAMMA BIOSYNTHETIC PROCESS	3.0787e-57	0.88838	0.91462	1	1
4	REACTOME DOWNSTREAM TCR SIGNALING	1.0832e-56	0.88789	0.87173	1	1
4	KEGG HEMATOPOIETIC CELL LINEAGE	4.9268e-50	0.88537	0.92614	1	1
4	T CELL DIFFERENTIATION	4.2596e-46	0.88095	0.82386	1	1
4	REACTOME CD28 DEPENDENT VAV1 PATHWAY	1.8372e-59	0.88081	0.91622	1	1
4	POSITIVE REGULATION OF DEFENSE RESPONSE	2.3538e-50	0.87628	0.91917	1	1
4	BIOCARTA CYTOKINE PATHWAY	2.3605e-53	0.86696	0.81789	1	1
4	POSITIVE REGULATION OF CYTOKINE BIOSYNTHETIC PROCESS	8.3021e-54	0.86536	0.86305	1	1
4	REACTOME TRAFFICKING AND PROCESSING OF ENDOSOMAL TLR	6.0676e-54	0.86175	0.84344	1	1
4	POSITIVE REGULATION OF T CELL ACTIVATION	4.7525e-48	0.85848	0.83309	1	1
4	BIOCARTA CSK PATHWAY	1.5649e-46	0.85499	0.83795	1	1
4	REGULATION OF INTERFERON GAMMA BIOSYNTHETIC PROCESS	5.2868e-55	0.84384	0.88119	1	1
4	PID TOLL ENDOGENOUS PATHWAY	1.3876e-65	0.83592	0.83456	1	1
4	REGULATION OF T CELL ACTIVATION	9.9153e-46	0.83376	0.79461	1	1
4	REACTOME IL 7 SIGNALING	4.0569e-48	0.82895	0.81694	1	1
4	POSITIVE REGULATION OF T CELL PROLIFERATION	1.0004e-47	0.82254	0.81297	1	1
4	DEFENSE RESPONSE TO VIRUS	1.1009e-54	0.81895	0.82008	1	1
4	IMMUNE RESPONSE	1.8962e-53	0.81851	0.81352	1	1
4	LYMPHOCYTE ACTIVATION	4.9128e-49	0.81587	0.80966	1	1
4	REGULATION OF LYMPHOCYTE ACTIVATION	7.886e-48	0.81385	0.7952	1	1
4	LEUKOCYTE MIGRATION	5.9572e-50	0.81237	0.82361	1	1
4	BIOCARTA IL7 PATHWAY	1.1881e-53	0.81117	0.79548	1	1
4	REACTOME REGULATION OF IFNG SIGNALING	1.8867e-71	0.81028	0.77521	1	1
4	HUMORAL IMMUNE RESPONSE	3.9285e-41	0.80954	0.77785	1	1
4	REACTOME REGULATION OF COMPLEMENT CASCADE	7.6868e-33	0.80769	0.84166	1	1
4	KEGG ANTIGEN PROCESSING AND PRESENTATION	1.4083e-56	0.80036	0.76715	1	1
4	PID INTEGRIN5 PATHWAY	4.2112e-46	0.79906	0.82817	1	1
4	PATTERN RECOGNITION RECEPTOR ACTIVITY	8.8598e-41	0.79315	0.84806	1	1
4	REACTOME INITIAL TRIGGERING OF COMPLEMENT	8.261e-32	0.7922	0.85481	1	1
4	REGULATION OF TYROSINE PHOSPHORYLATION OF STAT PROTEIN	4.1032e-53	0.79097	0.81281	1	1
4	B CELL ACTIVATION	1.8026e-52	0.7905	0.80191	1	1
4	POSITIVE REGULATION OF LYMPHOCYTE ACTIVATION	2.1719e-47	0.78881	0.78928	1	1
4	HEMATOPOIETIN INTERFERON CLASSD200 DOMAIN CYTOKINE RECEPTOR ACTIVITY	1.3855e-50	0.78857	0.82404	1	1
4	REACTOME COSTIMULATION BY THE CD28 FAMILY	5.7191e-60	0.78465	0.80823	1	1
4	PID INTEGRIN2 PATHWAY	6.3654e-40	0.77968	0.79267	1	1
4	BIOCARTA STEM PATHWAY	8.5334e-48	0.77931	0.79371	1	1
4	REACTOME PLATELET ADHESION TO EXPOSED COLLAGEN	5.8576e-44	0.77383	0.78774	1	1
4	POSITIVE REGULATION OF IMMUNE RESPONSE	6.944e-56	0.76983	0.83192	1	1
4	REACTOME SIGNAL REGULATORY PROTEIN SIRP FAMILY INTERACTIONS	9.4387e-55	0.76911	0.79879	1	1
4	POSITIVE REGULATION OF IMMUNE SYSTEM PROCESS	1.7165e-55	0.76889	0.77925	1	1
4	REACTOME INFLAMMASOMES	8.2417e-52	0.76289	0.74733	1	1
4	TYROSINE PHOSPHORYLATION OF STAT PROTEIN	4.3642e-60	0.76133	0.77971	1	1
4	PID INTEGRIN CS PATHWAY	3.4314e-50	0.761	0.81005	1	1
4	INTEGRIN COMPLEX	4.314e-46	0.75978	0.79399	1	1
4	BIOCARTA IL10 PATHWAY	5.0417e-58	0.75317	0.79793	1	1
4	REACTOME TRYPTOPHAN CATABOLISM	1.4711e-38	0.75255	0.7011	1	1
4	LEUKOCYTE ACTIVATION	4.9972e-49	0.75217	0.76336	1	1
4	PID INTEGRIN4 PATHWAY	1.3955e-19	0.74563	0.62142	1	1
4	BIOCARTA IL22BP PATHWAY	7.3913e-58	0.74513	0.72126	1	1
4	REGULATION OF T CELL PROLIFERATION	5.3147e-47	0.74474	0.70178	1	1
4	PID CD8TCRPATHWAY	3.398e-47	0.74434	0.75893	1	1
4	PID TCR PATHWAY	7.4486e-51	0.74424	0.76542	1	1
4	ACTIVATION OF IMMUNE RESPONSE	2.3706e-45	0.74334	0.77673	1	1
4	CYTOKINE BINDING	1.142e-48	0.7429	0.73725	1	1
4	REGULATION OF IMMUNE SYSTEM PROCESS	5.3458e-54	0.74141	0.75162	1	1
4	REACTOME EXTRINSIC PATHWAY FOR APOPTOSIS	8.0439e-64	0.73589	0.74713	1	1
4	REGULATION OF IMMUNE RESPONSE	4.1592e-55	0.73552	0.79064	1	1
4	DETECTION OF BIOTIC STIMULUS	5.9675e-44	0.73152	0.75527	1	1
4	BIOCARTA COMP PATHWAY	3.9068e-21	0.73109	0.66407	1	1
4	REACTOME TRAF6 MEDIATED IRF7 ACTIVATION IN TLR7 8 OR 9 SIGNALING	1.187e-55	0.73044	0.70091	1	1
4	NEGATIVE REGULATION OF IMMUNE SYSTEM PROCESS	4.524e-48	0.72969	0.76766	1	1
4	IMMUNE SYSTEM PROCESS	6.3097e-53	0.72106	0.72202	1	1
4	KEGG VIRAL MYOCARDITIS	7.0789e-49	0.71804	0.69417	1	1
4	INFLAMMATORY RESPONSE	1.4725e-54	0.71773	0.7467	1	1
4	PID UPA UPAR PATHWAY	2.0417e-47	0.71628	0.73783	1	1
4	CELL ACTIVATION	1.3155e-47	0.71561	0.70552	1	1
4	POSITIVE REGULATION OF TRANSLATION	3.3914e-53	0.71416	0.70989	1	1
4	T CELL PROLIFERATION	2.4168e-47	0.71247	0.71449	1	1
4	REACTOME ANTIGEN PRESENTATION FOLDING ASSEMBLY AND PEPTIDE LOADING OF CLASS I MHC	1.4025e-61	0.71151	0.68937	1	1
4	PID IL2 STAT5PATHWAY	5.1509e-60	0.70583	0.74572	1	1
4	ST INTERFERON GAMMA PATHWAY	8.8366e-38	0.70472	0.68577	1	1
4	BIOCARTA D4GDI PATHWAY	1.878e-58	0.70213	0.67248	1	1
4	BIOCARTA NKCELLS PATHWAY	6.5137e-37	0.69969	0.64926	1	1
4	REGULATION OF IMMUNE EFFECTOR PROCESS	2.685e-45	0.69803	0.66182	1	1
4	PID CD8TCRDOWNSTREAMPATHWAY	2.056e-52	0.6976	0.69894	1	1
4	BIOCARTA SET PATHWAY	2.0793e-46	0.69084	0.64107	1	1
4	REACTOME THE NLRP3 INFLAMMASOME	2.3181e-52	0.68889	0.74004	1	1
4	ANTIGEN BINDING	4.4187e-45	0.68706	0.70072	1	1
4	DEFENSE RESPONSE	2.6226e-57	0.68658	0.72335	1	1
4	CYTOKINE METABOLIC PROCESS	3.6135e-50	0.68308	0.67164	1	1
4	BIOCARTA ERYTH PATHWAY	1.3152e-34	0.68051	0.7232	1	1
4	BIOCARTA STATHMIN PATHWAY	1.1988e-36	0.67788	0.63562	1	1
4	PID FRA PATHWAY	1.4517e-40	0.67438	0.67663	1	1
4	REACTOME INTERFERON ALPHA BETA SIGNALING	4.4426e-48	0.67431	0.67208	1	1
4	POSITIVE REGULATION OF MULTICELLULAR ORGANISMAL PROCESS	1.8527e-51	0.66922	0.69411	1	1
4	EXTERNAL SIDE OF PLASMA MEMBRANE	1.3117e-28	0.66901	0.6445	1	1
4	PID INTEGRIN1 PATHWAY	1.7959e-27	0.66609	0.68895	1	1
4	REGULATION OF CYTOKINE BIOSYNTHETIC PROCESS	1.6072e-48	0.66421	0.67568	1	1
4	LYMPHOCYTE DIFFERENTIATION	7.8965e-46	0.66363	0.64719	1	1
4	KEGG CYTOKINE CYTOKINE RECEPTOR INTERACTION	9.7919e-51	0.66035	0.68135	1	1
4	SA CASPASE CASCADE	1.7035e-56	0.65574	0.59433	1	1
4	CYTOKINE BIOSYNTHETIC PROCESS	1.9086e-49	0.65544	0.66742	1	1
4	RESPONSE TO VIRUS	1.9946e-56	0.64171	0.64288	1	1
4	LEUKOCYTE DIFFERENTIATION	1.8071e-54	0.64029	0.65893	1	1
4	REACTOME INTERFERON SIGNALING	1.5407e-70	0.63427	0.62945	1	1
4	IMMUNE EFFECTOR PROCESS	4.9378e-48	0.63377	0.63453	1	1
4	CYTOKINE ACTIVITY	1.0593e-50	0.62676	0.62901	1	1
4	REACTOME PECAM1 INTERACTIONS	2.8496e-48	0.62398	0.61315	1	1
4	KEGG NOD LIKE RECEPTOR SIGNALING PATHWAY	2.2174e-60	0.62238	0.65786	1	1
4	BIOCARTA CASPASE PATHWAY	6.6307e-62	0.62172	0.60662	1	1
4	PID NFAT TFPATHWAY	1.9404e-44	0.61907	0.62399	1	1
4	REGULATION OF PEPTIDYL TYROSINE PHOSPHORYLATION	7.6765e-54	0.61884	0.64691	1	1
4	INTERLEUKIN 2 PRODUCTION	1.2545e-48	0.61719	0.65518	1	1
4	REACTOME P2Y RECEPTORS	4.0637e-28	0.61435	0.58321	1	1
4	BIOCARTA SODD PATHWAY	2.5398e-51	0.61238	0.60998	1	1
4	REGULATION OF JAK STAT CASCADE	1.647e-49	0.61101	0.64338	1	1
4	JAK STAT CASCADE	1.6723e-59	0.60856	0.59438	1	1
4	POSITIVE REGULATION OF CYTOKINE PRODUCTION	8.0042e-48	0.60768	0.66031	1	1
4	POSITIVE REGULATION OF CELL ADHESION	6.5525e-32	0.60713	0.66747	1	1
4	REACTOME ANTIGEN ACTIVATES B CELL RECEPTOR LEADING TO GENERATION OF SECOND MESSENGERS	1.3555e-41	0.60678	0.58887	1	1
4	REACTOME IL RECEPTOR SHC SIGNALING	1.9663e-53	0.60646	0.61526	1	1
4	PID INTEGRIN3 PATHWAY	9.6375e-31	0.59828	0.63013	1	1
4	RESPONSE TO OTHER ORGANISM	3.0196e-55	0.59805	0.59745	1	1
4	REACTOME IKK COMPLEX RECRUITMENT MEDIATED BY RIP1	4.0614e-53	0.59712	0.60178	1	1
4	CALCIUM MEDIATED SIGNALING	2.4412e-40	0.59695	0.60347	1	1
4	REACTOME GPVI MEDIATED ACTIVATION CASCADE	2.2e-49	0.59383	0.60526	1	1
4	KEGG NATURAL KILLER CELL MEDIATED CYTOTOXICITY	4.6941e-58	0.59227	0.60717	1	1
4	BIOCARTA IL2RB PATHWAY	1.0094e-60	0.59172	0.57793	1	1
4	KEGG TOLL LIKE RECEPTOR SIGNALING PATHWAY	1.4498e-66	0.59143	0.59044	1	1
4	MYELOID LEUKOCYTE DIFFERENTIATION	8.7118e-48	0.59077	0.61703	1	1
4	KEGG CELL ADHESION MOLECULES CAMS	5.4177e-38	0.58439	0.60506	1	1
4	RESPONSE TO WOUNDING	6.6047e-48	0.58369	0.59546	1	1
4	PID TCRJNKPATHWAY	6.231e-43	0.58317	0.56761	1	1
4	POSITIVE REGULATION OF CYTOKINE SECRETION	2.9019e-27	0.57713	0.56654	1	1
4	POSITIVE REGULATION OF RESPONSE TO STIMULUS	1.0561e-46	0.57388	0.64917	1	1
4	BIOCARTA IL2 PATHWAY	2.0893e-51	0.57299	0.56834	1	1
4	ST STAT3 PATHWAY	4.836e-39	0.56954	0.58184	1	1
4	REGULATION OF DEFENSE RESPONSE	7.1927e-42	0.5661	0.54712	1	1
4	REACTOME IL 3 5 AND GM CSF SIGNALING	9.2663e-56	0.5635	0.58075	1	1
4	CYTOKINE PRODUCTION	2.5543e-47	0.56307	0.56593	1	1
4	REACTOME CYCLIN A B1 ASSOCIATED EVENTS DURING G2 M TRANSITION	1.6338e-26	0.56246	0.54396	1	1
4	PID INTEGRIN A9B1 PATHWAY	6.1862e-39	0.56235	0.61686	1	1
4	REACTOME ACTIVATION OF IRF3 IRF7 MEDIATED BY TBK1 IKK EPSILON	3.2455e-50	0.56072	0.55332	1	1
4	BIOCARTA FIBRINOLYSIS PATHWAY	3.892e-23	0.56051	0.59551	1	1
4	RESPONSE TO BACTERIUM	4.5399e-42	0.55871	0.56662	1	1
4	REACTOME NUCLEOTIDE LIKE PURINERGIC RECEPTORS	9.2203e-31	0.55854	0.56815	1	1
4	BIOCARTA PML PATHWAY	6.0435e-52	0.55555	0.53138	1	1
4	INTERLEUKIN 8 BIOSYNTHETIC PROCESS	1.9819e-42	0.55211	0.54453	1	1
4	REACTOME CYTOKINE SIGNALING IN IMMUNE SYSTEM	2.1511e-74	0.55169	0.57236	1	1
4	REACTOME COMPLEMENT CASCADE	1.8029e-21	0.55165	0.53274	1	1
4	PID TCRCALCIUMPATHWAY	5.6908e-48	0.5509	0.5481	1	1
4	PID SYNDECAN 1 PATHWAY	2.3058e-21	0.54922	0.62256	1	1
4	CORNIFIED ENVELOPE	7.9162e-11	0.54538	0.48161	1	1
4	SH2 DOMAIN BINDING	1.8765e-47	0.54205	0.5623	1	1
4	REACTOME CELL SURFACE INTERACTIONS AT THE VASCULAR WALL	4.1531e-51	0.53733	0.57304	1	1
4	POSITIVE REGULATION OF PROTEIN SECRETION	5.4211e-25	0.53693	0.48436	1	1
4	LIPID RAFT	1.0844e-31	0.53633	0.51459	1	1
4	REACTOME INTEGRIN CELL SURFACE INTERACTIONS	2.1045e-36	0.53563	0.5445	1	1
4	PID SYNDECAN 4 PATHWAY	6.0631e-38	0.53437	0.58053	1	1
4	VIRAL GENOME REPLICATION	1.5279e-41	0.53062	0.48513	1	1
4	REACTOME SIGNALING BY ILS	9.8949e-68	0.52962	0.55335	1	1
4	ST T CELL SIGNAL TRANSDUCTION	1.2602e-40	0.52442	0.52818	1	1
4	INNATE IMMUNE RESPONSE	3.3161e-39	0.5217	0.53588	1	1
4	INTERLEUKIN 1 SECRETION	4.6838e-22	0.5216	0.5175	1	1
4	COLLAGEN	2.2719e-10	0.52083	0.55287	1	1
4	PEPTIDYL TYROSINE PHOSPHORYLATION	8.7291e-59	0.52023	0.55726	1	1
4	PID GLYPICAN 1PATHWAY	1.3703e-31	0.51876	0.53757	1	1
4	BIOCARTA CCR5 PATHWAY	1.8219e-33	0.51814	0.51656	1	1
4	REACTOME NUCLEOTIDE BINDING DOMAIN LEUCINE RICH REPEAT CONTAINING RECEPTOR NLR SIGNALING PATHWAYS	2.6092e-61	0.51773	0.51916	1	1
4	RESPONSE TO BIOTIC STIMULUS	8.8604e-56	0.5158	0.50401	1	1
4	PID AMB2 NEUTROPHILS PATHWAY	2.1008e-33	0.51314	0.51142	1	1
4	REACTOME THE ROLE OF NEF IN HIV1 REPLICATION AND DISEASE PATHOGENESIS	1.9974e-45	0.51243	0.52629	1	1
4	KEGG COMPLEMENT AND COAGULATION CASCADES	2.8719e-25	0.51138	0.49058	1	1
4	KEGG CHEMOKINE SIGNALING PATHWAY	2.4773e-43	0.50834	0.52741	1	1
4	GROWTH FACTOR BINDING	6.879e-36	0.50695	0.52452	1	1
4	CASPASE REGULATOR ACTIVITY	2.3788e-43	0.50564	0.49871	1	1
4	BIOCARTA TCR PATHWAY	4.1057e-46	0.50321	0.51916	1	1
4	REACTOME IL 2 SIGNALING	6.0698e-56	0.50301	0.51905	1	1
4	POSITIVE REGULATION OF CELL CYCLE	4.5097e-42	0.50262	0.54391	1	1
4	PEPTIDYL TYROSINE MODIFICATION	1.989e-56	0.49582	0.53082	1	1
4	HEMOPOIESIS	1.2077e-46	0.49558	0.50275	1	1
4	REACTOME EARLY PHASE OF HIV LIFE CYCLE	1.3396e-53	0.49515	0.46715	1	1
4	RESPONSE TO EXTERNAL STIMULUS	1.0063e-43	0.49422	0.50025	1	1
4	RECEPTOR COMPLEX	3.3622e-41	0.49396	0.53776	1	1
4	REACTOME G1 S SPECIFIC TRANSCRIPTION	7.4356e-21	0.49367	0.49802	1	1
4	PID IL5 PATHWAY	1.853e-50	0.49289	0.50347	1	1
4	KEGG T CELL RECEPTOR SIGNALING PATHWAY	1.5296e-48	0.49249	0.50971	1	1
4	SISTER CHROMATID SEGREGATION	4.3494e-32	0.48678	0.50657	1	1
4	REACTOME UNWINDING OF DNA	1.7675e-16	0.48605	0.46304	1	1
4	PID CXCR4 PATHWAY	1.8446e-52	0.48566	0.52301	1	1
4	PID AURORA B PATHWAY	1.0906e-34	0.48076	0.51106	1	1
4	PID PI3KCIPATHWAY	4.7068e-44	0.48042	0.47858	1	1
4	PID IL4 2PATHWAY	1.393e-35	0.47894	0.48067	1	1
4	BIOCARTA NTHI PATHWAY	5.5509e-53	0.47737	0.48509	1	1
4	IMMUNE SYSTEM DEVELOPMENT	2.2114e-44	0.47618	0.48261	1	1
4	BIOCARTA IL1R PATHWAY	4.3033e-54	0.47527	0.50491	1	1
4	HEMOPOIETIC OR LYMPHOID ORGAN DEVELOPMENT	2.5771e-44	0.47425	0.48508	1	1
4	KEGG ECM RECEPTOR INTERACTION	2.7451e-18	0.47315	0.50124	1	1
4	BIOCARTA TALL1 PATHWAY	5.4095e-40	0.47297	0.53006	1	1
4	POSITIVE REGULATION OF PEPTIDYL TYROSINE PHOSPHORYLATION	1.7131e-44	0.47213	0.52109	1	1
4	REACTOME RIP MEDIATED NFKB ACTIVATION VIA DAI	6.9886e-35	0.47117	0.45699	1	1
4	CYTOKINE SECRETION	1.3498e-24	0.47023	0.45469	1	1
4	SIG PIP3 SIGNALING IN B LYMPHOCYTES	3.0751e-46	0.47018	0.47284	1	1
4	REACTOME ANTIGEN PROCESSING CROSS PRESENTATION	1.6376e-53	0.46998	0.46083	1	1
4	REACTOME TRAF6 MEDIATED INDUCTION OF TAK1 COMPLEX	3.3032e-59	0.46949	0.48835	1	1
4	MITOTIC SISTER CHROMATID SEGREGATION	3.876e-29	0.46946	0.49696	1	1
4	KEGG JAK STAT SIGNALING PATHWAY	7.7808e-58	0.46698	0.46486	1	1
4	PID IL2 1PATHWAY	3.1095e-58	0.46626	0.48707	1	1
4	REACTOME CTLA4 INHIBITORY SIGNALING	3.2984e-59	0.46524	0.47004	1	1
4	BIOCARTA RANKL PATHWAY	1.1849e-45	0.46479	0.48036	1	1
4	PRODUCTION OF MOLECULAR MEDIATOR OF IMMUNE RESPONSE	1.6841e-35	0.46453	0.47399	1	1
4	PID BCR 5PATHWAY	1.0425e-44	0.46261	0.45965	1	1
4	PID ANTHRAXPATHWAY	7.0168e-42	0.46188	0.52244	1	1
4	COLLAGEN BINDING	6.2576e-16	0.45986	0.49204	1	1
4	BEHAVIOR	4.0371e-34	0.45905	0.50622	1	1
4	PID GMCSF PATHWAY	3.6187e-58	0.45778	0.48105	1	1
4	PID CXCR3PATHWAY	6.048e-48	0.45669	0.47781	1	1
4	KEGG CYTOSOLIC DNA SENSING PATHWAY	1.1478e-55	0.45623	0.46761	1	1
4	REACTOME NEF MEDIATES DOWN MODULATION OF CELL SURFACE RECEPTORS BY RECRUITING THEM TO CLATHRIN ADAPTERS	5.5912e-40	0.4558	0.41816	1	1
4	INTERLEUKIN 8 PRODUCTION	1.0278e-38	0.45503	0.45943	1	1
4	DEFENSE RESPONSE TO BACTERIUM	4.7287e-35	0.45346	0.51246	1	1
4	BIOCARTA CD40 PATHWAY	2.438e-43	0.45229	0.43162	1	1
4	CYTOKINE AND CHEMOKINE MEDIATED SIGNALING PATHWAY	1.473e-32	0.4514	0.45379	1	1
4	REACTOME CELL EXTRACELLULAR MATRIX INTERACTIONS	4.1448e-29	0.45009	0.50539	1	1
4	REACTOME CD28 CO STIMULATION	9.1614e-55	0.44775	0.44749	1	1
4	BIOCARTA NFKB PATHWAY	3.8748e-52	0.44423	0.45326	1	1
4	REGULATION OF VIRAL REPRODUCTION	1.5669e-35	0.44419	0.45717	1	1
4	BIOCARTA TOLL PATHWAY	2.8471e-54	0.44418	0.42938	1	1
4	PID IL6 7PATHWAY	2.9648e-49	0.44314	0.47457	1	1
4	REACTOME NOD1 2 SIGNALING PATHWAY	1.9334e-60	0.44243	0.43953	1	1
4	PID AVB3 OPN PATHWAY	1.5426e-45	0.43891	0.47314	1	1
4	REACTOME REGULATION OF SIGNALING BY CBL	6.8556e-49	0.43443	0.47815	1	1
4	REGULATION OF MITOSIS	2.0313e-37	0.4337	0.44697	1	1
4	DOUBLE STRANDED RNA BINDING	1.6016e-60	0.43308	0.44182	1	1
4	SPINDLE POLE	6.5953e-37	0.43107	0.45242	1	1
4	HOMEOSTASIS OF NUMBER OF CELLS	2.9463e-47	0.43034	0.46085	1	1
4	REGULATION OF RESPONSE TO STIMULUS	6.9331e-39	0.43019	0.49282	1	1
4	REGULATION OF CYTOKINE PRODUCTION	1.9228e-38	0.42921	0.48167	1	1
4	BIOCARTA CTCF PATHWAY	4.4869e-37	0.42733	0.42418	1	1
4	BIOCARTA SRCRPTP PATHWAY	1.2104e-24	0.42688	0.38856	1	1
4	KEGG B CELL RECEPTOR SIGNALING PATHWAY	3.6364e-39	0.42646	0.43369	1	1
4	REACTOME IMMUNE SYSTEM	3.9109e-65	0.4262	0.43283	1	1
4	PID PTP1BPATHWAY	9.6513e-43	0.42618	0.41386	1	1
4	MYELOID CELL DIFFERENTIATION	1.433e-48	0.42531	0.47086	1	1
4	PID IL8CXCR2 PATHWAY	1.9164e-33	0.42484	0.45765	1	1
4	PID FCER1PATHWAY	2.432e-43	0.42346	0.43992	1	1
4	MITOTIC SPINDLE ORGANIZATION AND BIOGENESIS	3.2677e-24	0.4234	0.47322	1	1
4	ACETYLGALACTOSAMINYLTRANSFERASE ACTIVITY	2.2427e-23	0.4197	0.42624	1	1
4	REGULATION OF CYTOKINE SECRETION	2.8137e-18	0.41796	0.39609	1	1
4	PID LYMPHANGIOGENESIS PATHWAY	7.8133e-40	0.4159	0.48847	1	1
4	BIOCARTA TNFR2 PATHWAY	1.8541e-43	0.41551	0.41225	1	1
4	BIOCARTA FREE PATHWAY	1.0193e-21	0.41405	0.38565	1	1
4	REACTOME ACTIVATION OF THE PRE REPLICATIVE COMPLEX	6.1291e-19	0.41323	0.39061	1	1
4	KEGG SYSTEMIC LUPUS ERYTHEMATOSUS	9.74e-34	0.4116	0.44937	1	1
4	PID DELTANP63PATHWAY	3.1427e-27	0.41071	0.37631	1	1
4	PID TCPTP PATHWAY	3.663e-58	0.4107	0.43383	1	1
4	REACTOME NFKB ACTIVATION THROUGH FADD RIP1 PATHWAY MEDIATED BY CASPASE 8 AND10	3.4007e-53	0.4074	0.42769	1	1
4	REACTOME NEGATIVE REGULATORS OF RIG I MDA5 SIGNALING	1.1641e-56	0.40719	0.38611	1	1
4	REACTOME COLLAGEN FORMATION	1.1084e-12	0.40676	0.46535	1	1
4	PID IL1PATHWAY	1.1897e-57	0.40592	0.40593	1	1
4	PID HIVNEFPATHWAY	1.3864e-53	0.40299	0.38965	1	1
4	PID TXA2PATHWAY	1.3465e-34	0.40123	0.43461	1	1
4	PID FOXM1PATHWAY	2.2783e-33	0.40073	0.44084	1	1
4	KEGG PANTOTHENATE AND COA BIOSYNTHESIS	1.9345e-34	0.3995	0.40662	1	1
4	PID INTEGRIN A4B1 PATHWAY	4.4199e-41	0.3994	0.41041	1	1
4	ST INTERLEUKIN 4 PATHWAY	4.6431e-56	0.39886	0.41167	1	1
4	METALLOPEPTIDASE ACTIVITY	8.0837e-27	0.3987	0.40184	1	1
4	BIOCARTA IL6 PATHWAY	7.2232e-47	0.39843	0.41406	1	1
4	BIOCARTA IL4 PATHWAY	1.1323e-43	0.39754	0.44724	1	1
4	ST TUMOR NECROSIS FACTOR PATHWAY	4.0814e-51	0.39723	0.395	1	1
4	CHROMOSOME SEGREGATION	3.8528e-34	0.3968	0.41142	1	1
4	BIOCARTA CBL PATHWAY	6.934e-27	0.39521	0.46691	1	1
4	SPINDLE	1.7473e-31	0.39509	0.42013	1	1
4	BIOCARTA RANMS PATHWAY	3.0434e-22	0.39499	0.3897	1	1
4	PID IL2 PI3KPATHWAY	9.4673e-53	0.3949	0.40316	1	1
4	REACTOME EXTRACELLULAR MATRIX ORGANIZATION	2.1487e-14	0.39424	0.45114	1	1
4	REACTOME TRAF3 DEPENDENT IRF ACTIVATION PATHWAY	4.2899e-47	0.39284	0.39355	1	1
4	REGULATION OF CELL CELL ADHESION	2.1651e-21	0.39211	0.41105	1	1
4	SUGAR BINDING	2.664e-19	0.3919	0.38521	1	1
4	PID SHP2 PATHWAY	6.7303e-42	0.39178	0.43269	1	1
4	BIOCARTA 41BB PATHWAY	1.3317e-52	0.39114	0.41328	1	1
4	REACTOME ADVANCED GLYCOSYLATION ENDPRODUCT RECEPTOR SIGNALING	6.4421e-25	0.39052	0.38295	1	1
4	M PHASE OF MITOTIC CELL CYCLE	2.1658e-34	0.39	0.38744	1	1
4	ARYLSULFATASE ACTIVITY	1.3722e-17	0.38978	0.41483	1	1
4	CELLULAR CATION HOMEOSTASIS	2.2552e-25	0.38764	0.3845	1	1
4	POSITIVE REGULATION OF EPITHELIAL CELL PROLIFERATION	1.3358e-18	0.3868	0.37918	1	1
4	BIOCARTA TID PATHWAY	6.3623e-36	0.38635	0.37611	1	1
4	BIOCARTA FAS PATHWAY	1.8202e-68	0.38492	0.40625	1	1
4	SERINE TYPE ENDOPEPTIDASE INHIBITOR ACTIVITY	2.0117e-19	0.38492	0.36578	1	1
4	REACTOME ADAPTIVE IMMUNE SYSTEM	1.2784e-58	0.38415	0.39672	1	1
4	REACTOME CD28 DEPENDENT PI3K AKT SIGNALING	2.9805e-47	0.38392	0.4142	1	1
4	REACTOME E2F MEDIATED REGULATION OF DNA REPLICATION	2.5542e-23	0.3826	0.38818	1	1
4	BIOCARTA DNAFRAGMENT PATHWAY	8.0344e-30	0.38108	0.35589	1	1
4	REACTOME REGULATION OF KIT SIGNALING	1.6449e-30	0.38099	0.37898	1	1
4	REACTOME TOLL RECEPTOR CASCADES	4.1869e-58	0.37895	0.38967	1	1
4	LYSOSOMAL MEMBRANE	5.0844e-39	0.37887	0.41573	1	1
4	CELL DIVISION	3.776e-37	0.37863	0.38656	1	1
4	CATION HOMEOSTASIS	7.2686e-25	0.3785	0.37133	1	1
4	SIG BCR SIGNALING PATHWAY	3.9076e-35	0.37838	0.38129	1	1
4	POSITIVE REGULATION OF SIGNAL TRANSDUCTION	1.0771e-65	0.37682	0.40589	1	1
4	REGULATION OF CELL ADHESION	1.4442e-35	0.37625	0.44474	1	1
4	PID PLK1 PATHWAY	3.9579e-27	0.37594	0.42293	1	1
4	REACTOME DEGRADATION OF THE EXTRACELLULAR MATRIX	7.9009e-14	0.3759	0.4217	1	1
4	SPINDLE ORGANIZATION AND BIOGENESIS	1.9371e-22	0.37501	0.42499	1	1
4	REACTOME INNATE IMMUNE SYSTEM	1.5896e-55	0.37486	0.37728	1	1
4	G1 S TRANSITION OF MITOTIC CELL CYCLE	1.327e-49	0.37408	0.3942	1	1
4	POSITIVE REGULATION OF CELLULAR PROTEIN METABOLIC PROCESS	2.1341e-41	0.37343	0.38526	1	1
4	REACTOME TRAF6 MEDIATED NFKB ACTIVATION	3.8234e-37	0.37197	0.37273	1	1
4	MITOSIS	2.4628e-33	0.37157	0.37364	1	1
4	CHROMOSOME CONDENSATION	7.2613e-23	0.37121	0.42432	1	1
4	PID NFKAPPABCANONICALPATHWAY	5.1113e-53	0.37028	0.38325	1	1
4	EXTRACELLULAR MATRIX STRUCTURAL CONSTITUENT	6.8027e-10	0.3702	0.3568	1	1
4	KEGG PRION DISEASES	1.9192e-29	0.37018	0.388	1	1
4	REGULATION OF I KAPPAB KINASE NF KAPPAB CASCADE	1.356e-63	0.36983	0.39223	1	1
4	PATTERN BINDING	2.0264e-19	0.36806	0.36862	1	1
4	PHOSPHOLIPASE C ACTIVATION	3.6009e-26	0.36797	0.3723	1	1
4	REACTOME TAK1 ACTIVATES NFKB BY PHOSPHORYLATION AND ACTIVATION OF IKKS COMPLEX	1.3454e-37	0.36701	0.36805	1	1
4	B CELL DIFFERENTIATION	1.3615e-27	0.36533	0.3836	1	1
4	I KAPPAB KINASE NF KAPPAB CASCADE	1.1943e-64	0.36484	0.38133	1	1
4	PID CD40 PATHWAY	4.2245e-39	0.36464	0.37626	1	1
4	HEMATOPOIETIN INTERFERON CLASSD200 DOMAIN CYTOKINE RECEPTOR BINDING	5.9913e-53	0.36311	0.3602	1	1
4	CYCLIC NUCLEOTIDE METABOLIC PROCESS	3.4286e-20	0.3607	0.32898	1	1
4	NLS BEARING SUBSTRATE IMPORT INTO NUCLEUS	3.5995e-52	0.35975	0.40169	1	1
4	POSITIVE REGULATION OF PROTEIN METABOLIC PROCESS	6.6389e-41	0.35822	0.37329	1	1
4	POSITIVE REGULATION OF I KAPPAB KINASE NF KAPPAB CASCADE	2.2535e-64	0.35787	0.37928	1	1
4	PID AP1 PATHWAY	5.3294e-27	0.35714	0.36729	1	1
4	PROTEASE INHIBITOR ACTIVITY	5.7541e-21	0.35709	0.35028	1	1
4	BIOCARTA EPHA4 PATHWAY	5.031e-12	0.35666	0.36459	1	1
4	PID IFNGPATHWAY	9.8615e-57	0.35658	0.36955	1	1
4	REACTOME G2 M CHECKPOINTS	2.4636e-19	0.35526	0.36767	1	1
4	EPITHELIAL TO MESENCHYMAL TRANSITION	5.072e-15	0.35515	0.35231	1	1
4	BIOCARTA CELLCYCLE PATHWAY	1.299e-26	0.35461	0.33976	1	1
4	M PHASE	1.0827e-32	0.35459	0.3523	1	1
4	PID AVB3 INTEGRIN PATHWAY	1.1806e-17	0.35411	0.3944	1	1
4	BIOCARTA HSP27 PATHWAY	9.7673e-31	0.35344	0.37262	1	1
4	CHROMOSOMEPERICENTRIC REGION	3.5813e-29	0.35335	0.37095	1	1
4	REACTOME G0 AND EARLY G1	1.6095e-21	0.35286	0.37747	1	1
4	PID EPOPATHWAY	1.6329e-51	0.35251	0.38427	1	1
4	PID SYNDECAN 2 PATHWAY	1.5609e-39	0.34875	0.38698	1	1
4	KEGG APOPTOSIS	4.5848e-56	0.34846	0.3483	1	1
4	SA REG CASCADE OF CYCLIN EXPR	8.2632e-15	0.34755	0.32502	1	1
4	REGULATION OF PROTEIN AMINO ACID PHOSPHORYLATION	6.1379e-37	0.34714	0.37024	1	1
4	REACTOME MHC CLASS II ANTIGEN PRESENTATION	3.272e-52	0.34674	0.35616	1	1
4	KERATINOCYTE DIFFERENTIATION	1.0354e-12	0.34616	0.50114	1	1
4	REACTOME IL1 SIGNALING	1.7429e-49	0.34364	0.35255	1	1
4	MULTI ORGANISM PROCESS	2.0051e-40	0.34327	0.36693	1	1
4	REACTOME MITOTIC PROMETAPHASE	3.7139e-27	0.34241	0.35494	1	1
4	POSITIVE REGULATION OF CELL PROLIFERATION	3.4585e-39	0.34203	0.38658	1	1
4	CYTOKINESIS	4.746e-29	0.34146	0.34228	1	1
4	VIRAL INFECTIOUS CYCLE	2.4206e-34	0.34035	0.34477	1	1
4	SMALL CONJUGATING PROTEIN BINDING	1.4073e-32	0.33823	0.34371	1	1
4	PID EPHRINBREVPATHWAY	2.9452e-30	0.33652	0.37267	1	1
4	BIOCARTA G1 PATHWAY	1.3543e-39	0.335	0.348	1	1
4	KEGG FC GAMMA R MEDIATED PHAGOCYTOSIS	6.5935e-42	0.33496	0.36785	1	1
4	NEGATIVE REGULATION OF CYTOKINE BIOSYNTHETIC PROCESS	4.4958e-14	0.33447	0.33657	1	1
4	REACTOME ER PHAGOSOME PATHWAY	4.9836e-34	0.3337	0.31693	1	1
4	REGULATION OF NUCLEOCYTOPLASMIC TRANSPORT	1.2284e-33	0.33333	0.30695	1	1
4	POSITIVE REGULATION OF PHOSPHATE METABOLIC PROCESS	1.9275e-39	0.33239	0.36741	1	1
4	CELL CYCLE PHASE	1.2535e-35	0.33183	0.3198	1	1
4	REACTOME HYALURONAN UPTAKE AND DEGRADATION	1.4543e-16	0.33149	0.27953	1	1
4	BIOCARTA MCM PATHWAY	1.3421e-14	0.33063	0.34497	1	1
4	MITOTIC CELL CYCLE CHECKPOINT	2.2644e-29	0.3306	0.35053	1	1
4	BIOCARTA BCR PATHWAY	4.471e-34	0.32751	0.34919	1	1
4	HYDROLASE ACTIVITY ACTING ON CARBON NITROGEN NOT PEPTIDEBONDSIN CYCLIC AMIDINES	5.5171e-27	0.32714	0.32523	1	1
4	POSITIVE REGULATION OF PHOSPHORYLATION	2.5901e-39	0.32628	0.37637	1	1
4	NEGATIVE REGULATION OF RESPONSE TO STIMULUS	1.6641e-14	0.32523	0.38665	1	1
4	RIBONUCLEASE ACTIVITY	1.812e-46	0.32502	0.33721	1	1
4	REGULATION OF PROTEIN IMPORT INTO NUCLEUS	3.9559e-20	0.32473	0.27997	1	1
4	BIOCARTA CARDIACEGF PATHWAY	2.5821e-13	0.32319	0.30105	1	1
4	PHAGOCYTOSIS	9.5828e-16	0.32293	0.35255	1	1
4	REACTOME ACTIVATION OF ATR IN RESPONSE TO REPLICATION STRESS	2.8125e-17	0.3217	0.32954	1	1
4	PID P38ALPHABETAPATHWAY	3.986e-35	0.32159	0.31898	1	1
4	REACTOME GRB2 SOS PROVIDES LINKAGE TO MAPK SIGNALING FOR INTERGRINS	1.6854e-23	0.32157	0.38267	1	1
4	VIRAL REPRODUCTIVE PROCESS	2.5032e-36	0.32112	0.32528	1	1
4	MITOTIC CELL CYCLE	1.7563e-34	0.32095	0.3118	1	1
4	REGULATION OF PHOSPHORYLATION	2.8622e-43	0.31989	0.35298	1	1
4	CELL CYCLE PROCESS	1.9103e-34	0.31814	0.30756	1	1
4	REACTOME DNA STRAND ELONGATION	6.5057e-16	0.31807	0.30165	1	1
4	PID AURORA A PATHWAY	5.0385e-33	0.31655	0.31449	1	1
4	BIOCARTA FCER1 PATHWAY	4.1828e-39	0.31542	0.36498	1	1
4	PID TNFPATHWAY	1.4382e-54	0.31497	0.31232	1	1
4	EXTRACELLULAR MATRIX PART	1.1378e-09	0.31479	0.32593	1	1
4	REACTOME ACTIVATED TLR4 SIGNALLING	1.6247e-57	0.31458	0.31934	1	1
4	PROTEIN SECRETION	8.5204e-28	0.31436	0.34751	1	1
4	SULFURIC ESTER HYDROLASE ACTIVITY	5.9894e-17	0.31335	0.34446	1	1
4	REACTOME BASIGIN INTERACTIONS	2.0968e-24	0.31331	0.34593	1	1
4	REACTOME MITOTIC M M G1 PHASES	2.8114e-28	0.31305	0.31538	1	1
4	KEGG LEUKOCYTE TRANSENDOTHELIAL MIGRATION	2.4109e-30	0.31268	0.32209	1	1
4	PID THROMBIN PAR4 PATHWAY	9.5338e-24	0.31248	0.32636	1	1
4	ST B CELL ANTIGEN RECEPTOR	9.321e-37	0.31209	0.30025	1	1
4	REGULATION OF JNK ACTIVITY	8.5205e-37	0.3117	0.31339	1	1
4	PID A6B1 A6B4 INTEGRIN PATHWAY	1.2174e-19	0.31142	0.26929	1	1
4	VIRAL REPRODUCTION	5.3682e-38	0.31088	0.3192	1	1
4	REACTOME GROWTH HORMONE RECEPTOR SIGNALING	1.307e-33	0.31013	0.33562	1	1
4	BIOCARTA PDGF PATHWAY	1.466e-35	0.30803	0.31947	1	1
4	AMINOPEPTIDASE ACTIVITY	3.2326e-26	0.30792	0.3179	1	1
4	BIOCARTA BCELLSURVIVAL PATHWAY	1.9028e-39	0.30703	0.32472	1	1
4	LIPID KINASE ACTIVITY	2.5753e-35	0.30655	0.3465	1	1
4	REACTOME P130CAS LINKAGE TO MAPK SIGNALING FOR INTEGRINS	7.6838e-22	0.30518	0.36797	1	1
4	UBIQUITIN BINDING	3.0748e-25	0.30441	0.31725	1	1
4	ION HOMEOSTASIS	3.344e-22	0.30439	0.3076	1	1
4	REACTOME RIG I MDA5 MEDIATED INDUCTION OF IFN ALPHA BETA PATHWAYS	4.2196e-53	0.30321	0.29906	1	1
4	REACTOME REGULATION OF IFNA SIGNALING	5.1543e-54	0.30279	0.3033	1	1
4	BLOOD COAGULATION	1.0656e-14	0.30194	0.28362	1	1
4	ENDOPLASMIC RETICULUM LUMEN	8.7513e-36	0.30137	0.34401	1	1
4	REACTOME DNA REPLICATION	2.7606e-28	0.30044	0.31649	1	1
4	PID KITPATHWAY	1.5427e-41	0.29989	0.31764	1	1
4	POSITIVE REGULATION OF JNK ACTIVITY	2.6241e-35	0.2998	0.30658	1	1
4	WOUND HEALING	3.0889e-17	0.29965	0.27918	1	1
4	BIOCARTA GSK3 PATHWAY	4.2718e-41	0.29769	0.30535	1	1
4	PID TCRRASPATHWAY	5.2335e-30	0.29759	0.31336	1	1
4	REACTOME RESPONSE TO ELEVATED PLATELET CYTOSOLIC CA2	1.5185e-20	0.29753	0.31619	1	1
4	VITAMIN TRANSPORT	1.1064e-14	0.29738	0.30562	1	1
4	POSITIVE REGULATION OF SECRETION	1.6808e-14	0.29711	0.29173	1	1
4	BIOCARTA RELA PATHWAY	7.6142e-37	0.29711	0.28824	1	1
4	REACTOME ACTIVATED TAK1 MEDIATES P38 MAPK ACTIVATION	1.916e-51	0.29553	0.30653	1	1
4	BIOCARTA RNA PATHWAY	5.8783e-57	0.29509	0.3273	1	1
4	REACTOME FANCONI ANEMIA PATHWAY	2.3754e-23	0.295	0.2947	1	1
4	REACTOME CROSS PRESENTATION OF SOLUBLE EXOGENOUS ANTIGENS ENDOSOMES	1.0344e-32	0.29478	0.2906	1	1
4	BIOCARTA SKP2E2F PATHWAY	2.1792e-18	0.29472	0.28032	1	1
4	CARBOHYDRATE BINDING	1.4662e-15	0.29375	0.30705	1	1
4	BIOCARTA IL3 PATHWAY	1.128e-25	0.29251	0.26971	1	1
4	PROTEINACEOUS EXTRACELLULAR MATRIX	1.3114e-09	0.29222	0.31974	1	1
4	REACTOME ANTIVIRAL MECHANISM BY IFN STIMULATED GENES	3.5096e-59	0.29167	0.29996	1	1
4	KEGG FOCAL ADHESION	2.942e-21	0.29023	0.32793	1	1
4	PID CASPASE PATHWAY	4.207e-48	0.28866	0.30418	1	1
4	BIOCARTA TPO PATHWAY	6.8408e-36	0.28801	0.30888	1	1
4	REACTOME G1 S TRANSITION	6.9406e-27	0.28752	0.27149	1	1
4	BIOCARTA HIVNEF PATHWAY	4.6693e-56	0.2875	0.29378	1	1
4	REACTOME DOUBLE STRAND BREAK REPAIR	1.8955e-28	0.28645	0.28918	1	1
4	ANTI APOPTOSIS	1.6179e-50	0.28595	0.29281	1	1
4	PEPTIDYL AMINO ACID MODIFICATION	7.2142e-58	0.28566	0.31367	1	1
4	EXTRACELLULAR MATRIX	1.9367e-09	0.28528	0.31256	1	1
4	KEGG SMALL CELL LUNG CANCER	3.9335e-37	0.28457	0.31907	1	1
4	COAGULATION	1.7841e-12	0.28437	0.2513	1	1
4	SPINDLE MICROTUBULE	2.6303e-21	0.28398	0.29558	1	1
4	REACTOME SEMA3A PAK DEPENDENT AXON REPULSION	4.594e-31	0.28385	0.30216	1	1
4	BIOCARTA EGF PATHWAY	1.3494e-40	0.28335	0.3149	1	1
4	REACTOME BILE SALT AND ORGANIC ANION SLC TRANSPORTERS	8.5277e-13	0.28243	0.29281	1	1
4	REACTOME S PHASE	1.59e-26	0.28123	0.25481	1	1
4	ACUTE INFLAMMATORY RESPONSE	6.6945e-07	0.28117	0.2479	1	1
4	REACTOME KINESINS	3.2842e-16	0.28064	0.29283	1	1
4	PID TRAIL PATHWAY	8.3906e-49	0.28044	0.30296	1	1
4	REACTOME MITOTIC G1 G1 S PHASES	1.1703e-28	0.28004	0.2675	1	1
4	REACTOME PLATELET ACTIVATION SIGNALING AND AGGREGATION	4.3025e-25	0.27977	0.27581	1	1
4	REACTOME ORC1 REMOVAL FROM CHROMATIN	2.0957e-29	0.27897	0.25126	1	1
4	INOSITOL OR PHOSPHATIDYLINOSITOL PHOSPHODIESTERASE ACTIVITY	4.7524e-13	0.27872	0.3387	1	1
4	SULFUR COMPOUND BIOSYNTHETIC PROCESS	3.9445e-20	0.27869	0.28217	1	1
4	REACTOME MYD88 MAL CASCADE INITIATED ON PLASMA MEMBRANE	1.4826e-52	0.27861	0.28892	1	1
4	PID IL3 PATHWAY	1.1963e-35	0.27849	0.27746	1	1
4	PID P53DOWNSTREAMPATHWAY	4.0086e-38	0.27839	0.30134	1	1
4	REACTOME SYNTHESIS OF DNA	7.055e-26	0.27746	0.25761	1	1
4	BIOCARTA ATM PATHWAY	3.2932e-35	0.2768	0.30129	1	1
4	VACUOLAR MEMBRANE	4.5444e-20	0.27625	0.28455	1	1
4	METALLOEXOPEPTIDASE ACTIVITY	2.0678e-12	0.27601	0.25909	1	1
4	HEMOSTASIS	4.4714e-14	0.2757	0.26309	1	1
4	BIOCARTA GCR PATHWAY	6.5027e-38	0.27521	0.29555	1	1
4	PID FASPATHWAY	1.2364e-42	0.27442	0.29563	1	1
4	PID ECADHERIN STABILIZATION PATHWAY	5.6501e-24	0.27406	0.25829	1	1
4	REACTOME M G1 TRANSITION	3.0543e-23	0.27398	0.25007	1	1
4	NEGATIVE REGULATION OF APOPTOSIS	2.0896e-47	0.27327	0.28186	1	1
4	S PHASE	2.6645e-23	0.27314	0.27891	1	1
4	REACTOME HOMOLOGOUS RECOMBINATION REPAIR OF REPLICATION INDEPENDENT DOUBLE STRAND BREAKS	2.2456e-22	0.27288	0.29865	1	1
4	NEGATIVE REGULATION OF PROGRAMMED CELL DEATH	3.7949e-47	0.27159	0.28217	1	1
4	KINETOCHORE	1.6527e-29	0.2711	0.29882	1	1
4	REGULATION OF PROTEIN SECRETION	1.6141e-16	0.27075	0.29542	1	1
4	REACTOME NFKB AND MAP KINASES ACTIVATION MEDIATED BY TLR4 SIGNALING REPERTOIRE	2.0163e-51	0.27051	0.27461	1	1
4	RNA CATABOLIC PROCESS	3.2795e-39	0.26966	0.28774	1	1
4	RESPONSE TO CHEMICAL STIMULUS	3.283e-28	0.26943	0.26124	1	1
4	PID ARF6 TRAFFICKINGPATHWAY	3.7836e-24	0.26928	0.25906	1	1
4	CELL STRUCTURE DISASSEMBLY DURING APOPTOSIS	5.3314e-14	0.26919	0.2193	1	1
4	KEGG RIG I LIKE RECEPTOR SIGNALING PATHWAY	1.3792e-46	0.26895	0.2671	1	1
4	REACTOME REGULATION OF MITOTIC CELL CYCLE	6.5021e-27	0.2687	0.24754	1	1
4	REACTOME PEPTIDE LIGAND BINDING RECEPTORS	4.4293e-18	0.26778	0.30691	1	1
4	EXTRACELLULAR REGION	2.0021e-16	0.2673	0.27518	1	1
4	REGULATION OF TRANSLATION	1.2038e-40	0.26659	0.27614	1	1
4	ER GOLGI INTERMEDIATE COMPARTMENT	1.2832e-34	0.26608	0.29167	1	1
4	KEGG PANCREATIC CANCER	1.802e-50	0.26534	0.28284	1	1
4	PID BARD1PATHWAY	3.6386e-26	0.26524	0.27779	1	1
4	BIOCARTA KERATINOCYTE PATHWAY	2.414e-34	0.26521	0.27561	1	1
4	PID ATF2 PATHWAY	1.3523e-24	0.26506	0.27148	1	1
4	REACTOME TRIF MEDIATED TLR3 SIGNALING	3.0448e-48	0.26502	0.25753	1	1
4	REGULATION OF PROGRAMMED CELL DEATH	8.8525e-49	0.26494	0.28162	1	1
4	REGULATION OF DNA METABOLIC PROCESS	1.7581e-36	0.26467	0.25609	1	1
4	EXTRACELLULAR REGION PART	4.5213e-15	0.26439	0.27147	1	1
4	HEPARIN BINDING	5.2733e-08	0.26244	0.25903	1	1
4	NEGATIVE REGULATION OF PHOSPHORYLATION	5.118e-09	0.26236	0.23022	1	1
4	REGULATION OF DNA REPLICATION	2.7225e-25	0.26215	0.29078	1	1
4	EXTRACELLULAR SPACE	6.0939e-17	0.26211	0.26509	1	1
4	LEADING EDGE	1.7447e-30	0.26204	0.28531	1	1
4	POSITIVE REGULATION OF CASPASE ACTIVITY	2.6683e-19	0.26154	0.2377	1	1
4	PID S1P S1P1 PATHWAY	3.153e-20	0.26133	0.29426	1	1
4	BIOCARTA DEATH PATHWAY	1.5447e-36	0.26026	0.26294	1	1
4	PID EPHA FWDPATHWAY	4.7145e-19	0.26003	0.28482	1	1
4	EXOPEPTIDASE ACTIVITY	5.8272e-21	0.2597	0.29327	1	1
4	PID PDGFRBPATHWAY	2.5233e-46	0.25962	0.27588	1	1
4	RUFFLE	5.1937e-30	0.2595	0.30951	1	1
4	REACTOME HYALURONAN METABOLISM	4.8022e-14	0.25946	0.26765	1	1
4	NEGATIVE REGULATION OF MULTICELLULAR ORGANISMAL PROCESS	1.1753e-16	0.25941	0.27153	1	1
4	REGULATION OF APOPTOSIS	8.4236e-49	0.25916	0.28149	1	1
4	INTERPHASE	1.2928e-32	0.25906	0.26047	1	1
4	REACTOME PYRIMIDINE CATABOLISM	1.5798e-15	0.25877	0.26911	1	1
4	ACTIVATION OF NF KAPPAB TRANSCRIPTION FACTOR	2.2554e-21	0.25854	0.27907	1	1
4	KEGG FC EPSILON RI SIGNALING PATHWAY	4.545e-28	0.25837	0.26955	1	1
4	PROTEIN IMPORT INTO NUCLEUS	8.1208e-49	0.25783	0.26436	1	1
4	UNFOLDED PROTEIN RESPONSE	5.7014e-24	0.25679	0.25972	1	1
4	EPIDERMIS DEVELOPMENT	1.3136e-09	0.25674	0.37142	1	1
4	OXIDOREDUCTASE ACTIVITY GO 0016706	4.6808e-18	0.25533	0.27302	1	1
4	REACTOME G ALPHA I SIGNALLING EVENTS	1.9718e-17	0.25525	0.29183	1	1
4	POSITIVE REGULATION OF DNA METABOLIC PROCESS	6.0604e-11	0.2551	0.26697	1	1
4	COFACTOR TRANSPORT	1.322e-08	0.25486	0.23804	1	1
4	ST PHOSPHOINOSITIDE 3 KINASE PATHWAY	2.249e-42	0.25449	0.26155	1	1
4	BIOCARTA HCMV PATHWAY	6.0776e-41	0.25444	0.27009	1	1
4	PID S1P S1P3 PATHWAY	1.0501e-20	0.25429	0.25168	1	1
4	PID P73PATHWAY	2.1237e-34	0.25428	0.27518	1	1
4	REACTOME PURINE SALVAGE	2.8893e-27	0.25413	0.24687	1	1
4	ST GA12 PATHWAY	4.0721e-18	0.25353	0.25693	1	1
4	BIOCARTA ETS PATHWAY	5.2053e-27	0.25344	0.27183	1	1
4	DNA RECOMBINATION	6.3198e-36	0.25333	0.26722	1	1
4	NUCLEAR IMPORT	4.2646e-50	0.25312	0.25823	1	1
4	TISSUE DEVELOPMENT	1.4175e-13	0.25276	0.31584	1	1
4	KEGG CELL CYCLE	1.0583e-30	0.2527	0.27896	1	1
4	REGULATION OF CELL PROLIFERATION	1.714e-32	0.25266	0.27732	1	1
4	RECEPTOR SIGNALING PROTEIN ACTIVITY	4.8318e-32	0.25264	0.26615	1	1
4	REACTOME EICOSANOID LIGAND BINDING RECEPTORS	5.4785e-07	0.25263	0.25609	1	1
4	BIOCARTA MET PATHWAY	1.7878e-37	0.25239	0.27423	1	1
4	KEGG BLADDER CANCER	8.417e-28	0.25202	0.27538	1	1
4	PROGRAMMED CELL DEATH	2.0151e-45	0.252	0.26197	1	1
4	BIOCARTA ECM PATHWAY	1.7747e-41	0.25144	0.29503	1	1
4	PID ANGIOPOIETINRECEPTOR PATHWAY	1.6909e-25	0.25136	0.25426	1	1
4	PID RAC1 PATHWAY	1.2588e-49	0.25076	0.26226	1	1
4	BIOCARTA PLATELETAPP PATHWAY	2.1421e-08	0.25046	0.29538	1	1
4	BIOCARTA P38MAPK PATHWAY	2.8073e-48	0.24949	0.26372	1	1
4	CELL CYCLE CHECKPOINT GO 0000075	3.0196e-25	0.24891	0.28144	1	1
4	APOPTOSIS GO	1.6163e-45	0.24846	0.26182	1	1
4	BIOCARTA LONGEVITY PATHWAY	1.1163e-15	0.24841	0.25195	1	1
4	PID ATR PATHWAY	2.9942e-18	0.24837	0.267	1	1
4	POLYSACCHARIDE BINDING	3.6096e-09	0.24835	0.26444	1	1
4	REACTOME LATENT INFECTION OF HOMO SAPIENS WITH MYCOBACTERIUM TUBERCULOSIS	1.3949e-19	0.24798	0.25267	1	1
4	REACTOME HOST INTERACTIONS OF HIV FACTORS	3.3336e-46	0.24787	0.2407	1	1
4	RESPONSE TO STRESS	2.4383e-42	0.24764	0.25766	1	1
4	REGULATION OF SIGNAL TRANSDUCTION	2.1475e-36	0.24679	0.25083	1	1
4	PID ALPHASYNUCLEIN PATHWAY	1.4422e-15	0.24647	0.24366	1	1
4	ESTABLISHMENT AND OR MAINTENANCE OF CELL POLARITY	1.9618e-16	0.24552	0.25517	1	1
4	ACTIVATION OF JNK ACTIVITY	6.7528e-24	0.24491	0.22312	1	1
4	REACTOME TRAF6 MEDIATED IRF7 ACTIVATION	2.6272e-49	0.24461	0.24347	1	1
4	REACTOME TRAF6 MEDIATED INDUCTION OF NFKB AND MAP KINASES UPON TLR7 8 OR 9 ACTIVATION	1.812e-46	0.24399	0.24536	1	1
4	BIOCARTA SPPA PATHWAY	1.7703e-23	0.24325	0.28169	1	1
4	CHEMICAL HOMEOSTASIS	1.869e-16	0.24319	0.23129	1	1
4	REGULATION OF MULTICELLULAR ORGANISMAL PROCESS	2.4009e-19	0.24311	0.30365	1	1
4	PID ERBB1 RECEPTOR PROXIMAL PATHWAY	1.5098e-45	0.24245	0.2694	1	1
4	REACTOME POL SWITCHING	1.3801e-16	0.24243	0.24308	1	1
4	PHOSPHOLIPASE C ACTIVITY	1.5443e-09	0.24108	0.27111	1	1
4	CELL PROLIFERATION GO 0008283	1.9088e-35	0.24092	0.2726	1	1
4	BIOCARTA TNFR1 PATHWAY	4.3949e-49	0.24046	0.26913	1	1
4	INTEGRIN BINDING	4.7422e-08	0.24034	0.21456	1	1
4	PID CMYB PATHWAY	6.6004e-35	0.24033	0.25336	1	1
4	SA B CELL RECEPTOR COMPLEXES	9.2115e-33	0.2403	0.28031	1	1
4	PROTEIN KINASE CASCADE	1.1321e-37	0.23997	0.23663	1	1
4	BIOCARTA HER2 PATHWAY	3.6931e-16	0.23977	0.26876	1	1
4	PID ERBB NETWORK PATHWAY	3.0042e-06	0.23936	0.21533	1	1
4	REACTOME CELL CYCLE MITOTIC	4.979e-26	0.23924	0.25164	1	1
4	KEGG NICOTINATE AND NICOTINAMIDE METABOLISM	7.5591e-20	0.2389	0.24506	1	1
4	KEGG PROTEASOME	6.0878e-21	0.23847	0.21882	1	1
4	REACTOME CELL CYCLE CHECKPOINTS	5.6094e-24	0.23841	0.23844	1	1
4	REACTOME SCFSKP2 MEDIATED DEGRADATION OF P27 P21	1.2542e-23	0.23805	0.21332	1	1
4	REACTOME CYCLIN E ASSOCIATED EVENTS DURING G1 S TRANSITION	1.3756e-26	0.23726	0.22154	1	1
4	REGULATION OF INTRACELLULAR TRANSPORT	1.7075e-20	0.23694	0.21995	1	1
4	BIOCARTA ATRBRCA PATHWAY	2.7525e-21	0.23693	0.25458	1	1
4	POSITIVE REGULATION OF TRANSCRIPTION FACTOR ACTIVITY	1.8568e-22	0.23658	0.25396	1	1
4	BIOCARTA MCALPAIN PATHWAY	2.7477e-30	0.23484	0.26554	1	1
4	PID NFKAPPABATYPICALPATHWAY	1.0576e-23	0.23475	0.22975	1	1
4	BIOCARTA ACH PATHWAY	2.951e-22	0.23469	0.22771	1	1
4	KEGG RENIN ANGIOTENSIN SYSTEM	7.2247e-07	0.23464	0.21958	1	1
4	PID E2F PATHWAY	1.1699e-25	0.23425	0.26231	1	1
4	NEGATIVE REGULATION OF PHOSPHATE METABOLIC PROCESS	2.1608e-08	0.23376	0.20721	1	1
4	PID PDGFRAPATHWAY	3.0714e-26	0.23357	0.26333	1	1
4	EXONUCLEASE ACTIVITY	1.8961e-27	0.23344	0.21503	1	1
4	KEGG P53 SIGNALING PATHWAY	6.0098e-28	0.23317	0.23704	1	1
4	REGULATION OF RHO GTPASE ACTIVITY	2.5553e-18	0.23212	0.22901	1	1
4	GTP BINDING	1.0137e-45	0.23195	0.24184	1	1
4	REACTOME SHC1 EVENTS IN EGFR SIGNALING	6.1805e-31	0.23101	0.25666	1	1
4	BIOCARTA STRESS PATHWAY	1.3833e-36	0.23073	0.24223	1	1
4	PROTEIN HETERODIMERIZATION ACTIVITY	3.1478e-41	0.23056	0.23798	1	1
4	MOLECULAR ADAPTOR ACTIVITY	1.0252e-15	0.23051	0.21185	1	1
4	PROTEIN IMPORT INTO NUCLEUS TRANSLOCATION	4.5565e-25	0.22996	0.26597	1	1
4	REACTOME SIGNALING BY THE B CELL RECEPTOR BCR	1.124e-41	0.22943	0.23118	1	1
4	LAMELLIPODIUM	1.3037e-20	0.22826	0.24788	1	1
4	KEGG DNA REPLICATION	1.3591e-13	0.22755	0.20672	1	1
4	KEGG PATHOGENIC ESCHERICHIA COLI INFECTION	4.3756e-33	0.22748	0.2517	1	1
4	ECTODERM DEVELOPMENT	5.1685e-10	0.22729	0.38379	1	1
4	BIOCARTA GLEEVEC PATHWAY	5.9059e-31	0.22724	0.24487	1	1
4	POSITIVE REGULATION OF PROTEIN AMINO ACID PHOSPHORYLATION	2.2856e-19	0.22724	0.2574	1	1
4	BIOCARTA FMLP PATHWAY	2.2779e-30	0.22643	0.2514	1	1
4	REACTOME APC C CDH1 MEDIATED DEGRADATION OF CDC20 AND OTHER APC C CDH1 TARGETED PROTEINS IN LATE MITOSIS EARLY G1	1.5945e-21	0.22641	0.2076	1	1
4	REACTOME THE ACTIVATION OF ARYLSULFATASES	2.8499e-10	0.22639	0.25968	1	1
4	SIG IL4RECEPTOR IN B LYPHOCYTES	2.2005e-31	0.2263	0.23801	1	1
4	BIOCARTA G2 PATHWAY	1.0959e-21	0.2261	0.27203	1	1
4	ST FAS SIGNALING PATHWAY	9.8404e-46	0.22609	0.23335	1	1
4	REACTOME CHONDROITIN SULFATE BIOSYNTHESIS	7.8394e-10	0.22584	0.26717	1	1
4	PID REG GR PATHWAY	2.7907e-28	0.22575	0.24801	1	1
4	KEGG TRYPTOPHAN METABOLISM	1.0887e-12	0.2256	0.19266	1	1
4	LOW DENSITY LIPOPROTEIN BINDING	1.4663e-12	0.22547	0.26611	1	1
4	REACTOME INTEGRIN ALPHAIIB BETA3 SIGNALING	1.3089e-21	0.22519	0.2749	1	1
4	BIOCARTA ARF PATHWAY	1.6555e-21	0.22509	0.23037	1	1
4	RECEPTOR BINDING	2.6968e-23	0.22442	0.24821	1	1
4	REACTOME PYRIMIDINE METABOLISM	2.1707e-21	0.22428	0.23321	1	1
4	BIOCARTA ERK5 PATHWAY	3.3844e-31	0.22428	0.24956	1	1
4	REACTOME HEMOSTASIS	1.2353e-27	0.22427	0.2419	1	1
4	PID MYC ACTIVPATHWAY	7.4736e-34	0.22409	0.23318	1	1
4	LIPOPROTEIN BINDING	3.3844e-13	0.22319	0.25298	1	1
4	DNA DAMAGE RESPONSESIGNAL TRANSDUCTION RESULTING IN INDUCTION OF APOPTOSIS	7.2801e-15	0.22261	0.20486	1	1
4	SIG CHEMOTAXIS	6.1676e-29	0.22258	0.25565	1	1
4	REACTOME ASSEMBLY OF THE PRE REPLICATIVE COMPLEX	4.8988e-21	0.22236	0.21905	1	1
4	RESPIRATORY GASEOUS EXCHANGE	4.3927e-13	0.22152	0.25083	1	1
4	REACTOME APC C CDC20 MEDIATED DEGRADATION OF MITOTIC PROTEINS	2.0192e-21	0.22131	0.20466	1	1
4	BIOCARTA AKAP95 PATHWAY	3.6915e-22	0.22097	0.2268	1	1
4	HETEROPHILIC CELL ADHESION	8.3776e-08	0.22072	0.22221	1	1
4	NUCLEOTIDE SUGAR METABOLIC PROCESS	5.6552e-14	0.22069	0.2088	1	1
4	PID ECADHERIN KERATINOCYTE PATHWAY	1.6283e-23	0.22003	0.22225	1	1
4	BIOCARTA CDC42RAC PATHWAY	1.7465e-30	0.21926	0.23796	1	1
4	POSITIVE REGULATION OF BIOLOGICAL PROCESS	2.3864e-38	0.21825	0.24926	1	1
4	POSITIVE REGULATION OF MAP KINASE ACTIVITY	7.4757e-18	0.21737	0.216	1	1
4	PID VEGFR1 PATHWAY	1.2714e-21	0.21648	0.2363	1	1
4	CENTROSOME	1.5927e-28	0.21624	0.2444	1	1
4	VACUOLAR PART	4.0841e-15	0.21602	0.21424	1	1
4	INTERPHASE OF MITOTIC CELL CYCLE	1.6633e-27	0.21588	0.22991	1	1
4	POSITIVE REGULATION OF CELL DIFFERENTIATION	1.4005e-11	0.21556	0.22059	1	1
4	CYCLASE ACTIVITY	1.189e-10	0.21516	0.21444	1	1
4	CELL CYCLE GO 0007049	7.6206e-32	0.21515	0.21736	1	1
4	GUANYL NUCLEOTIDE BINDING	5.2134e-39	0.21503	0.22235	1	1
4	DNA REPLICATION INITIATION	3.7521e-12	0.2148	0.21928	1	1
4	PEPTIDASE ACTIVITY	1.0805e-21	0.2145	0.2184	1	1
4	POSITIVE REGULATION OF DEVELOPMENTAL PROCESS	3.5822e-34	0.2132	0.24315	1	1
4	CYSTEINE TYPE PEPTIDASE ACTIVITY	1.3746e-30	0.21318	0.21471	1	1
4	REACTOME SIGNALING BY CONSTITUTIVELY ACTIVE EGFR	8.0945e-28	0.21315	0.22198	1	1
4	GLYCOSAMINOGLYCAN BINDING	3.4774e-08	0.21298	0.25397	1	1
4	DNA DAMAGE RESPONSESIGNAL TRANSDUCTION BY P53 CLASS MEDIATOR	1.724e-32	0.21288	0.22107	1	1
4	CELLULAR HOMEOSTASIS	8.8215e-16	0.21283	0.22303	1	1
4	DNA DEPENDENT ATPASE ACTIVITY	1.9236e-23	0.21254	0.25101	1	1
4	INDUCTION OF APOPTOSIS BY INTRACELLULAR SIGNALS	4.8194e-19	0.21242	0.1801	1	1
4	REGULATION OF RAS PROTEIN SIGNAL TRANSDUCTION	6.88e-19	0.21219	0.21044	1	1
4	CONDENSED CHROMOSOME	2.1583e-23	0.21196	0.23309	1	1
4	SPHINGOID METABOLIC PROCESS	3.7546e-21	0.21175	0.23633	1	1
4	BIOCARTA SALMONELLA PATHWAY	1.176e-22	0.21169	0.21262	1	1
4	KEGG REGULATION OF ACTIN CYTOSKELETON	2.4123e-29	0.21077	0.23632	1	1
4	REACTOME CLASS I MHC MEDIATED ANTIGEN PROCESSING PRESENTATION	2.0644e-58	0.20903	0.20597	1	1
4	CELL MIGRATION	3.2009e-16	0.20901	0.2268	1	1
4	SH3 SH2 ADAPTOR ACTIVITY	9.3165e-14	0.20854	0.1968	1	1
4	KEGG ACUTE MYELOID LEUKEMIA	6.0482e-28	0.20824	0.21196	1	1
4	LYSOSOME	9.4998e-28	0.20787	0.2274	1	1
4	LYTIC VACUOLE	9.4998e-28	0.20787	0.2274	1	1
4	NEGATIVE REGULATION OF SECRETION	4.8405e-06	0.20722	0.18668	1	1
4	REACTOME COMMON PATHWAY	4.5609e-06	0.20719	0.21518	1	1
4	PHOSPHOLIPASE ACTIVITY	5.6229e-09	0.20715	0.1844	1	1
4	REACTOME REPAIR SYNTHESIS FOR GAP FILLING BY DNA POL IN TC NER	1.6039e-12	0.20711	0.20256	1	1
4	ACTIVATION OF MAPK ACTIVITY	2.2191e-15	0.20678	0.19803	1	1
4	REGULATION OF DEVELOPMENTAL PROCESS	1.2569e-36	0.2067	0.23208	1	1
4	NEGATIVE REGULATION OF DEVELOPMENTAL PROCESS	2.2073e-32	0.20635	0.22149	1	1
4	REACTOME APOPTOTIC CLEAVAGE OF CELL ADHESION PROTEINS	2.8972e-06	0.20603	0.2831	1	1
4	MAP KINASE KINASE KINASE ACTIVITY	1.1236e-15	0.20555	0.20973	1	1
4	REACTOME SYNTHESIS OF PIPS AT THE PLASMA MEMBRANE	8.5699e-16	0.20541	0.20192	1	1
4	REACTOME ACTIVATION OF NF KAPPAB IN B CELLS	1.8597e-27	0.2054	0.18502	1	1
4	LIPASE ACTIVITY	2.9525e-09	0.20525	0.177	1	1
4	PHOSPHOLIPASE A2 ACTIVITY	0.00061098	0.20519	0.14444	1	1
4	POSITIVE REGULATION OF DNA BINDING	2.8958e-20	0.20487	0.2174	1	1
4	HISTONE ACETYLTRANSFERASE ACTIVITY	4.0898e-19	0.20465	0.24907	1	1
4	MEIOTIC CELL CYCLE	2.2373e-18	0.20457	0.23124	1	1
4	REACTOME CDK MEDIATED PHOSPHORYLATION AND REMOVAL OF CDC6	8.0891e-19	0.20346	0.18994	1	1
4	ACETYLGLUCOSAMINYLTRANSFERASE ACTIVITY	9.1233e-17	0.20294	0.22487	1	1
4	BIOCARTA AKAP13 PATHWAY	1.5299e-20	0.20232	0.27606	1	1
4	POSITIVE REGULATION OF CELLULAR PROCESS	3.023e-38	0.20226	0.24278	1	1
4	HOMEOSTATIC PROCESS	4.1247e-16	0.20213	0.19648	1	1
4	POSITIVE REGULATION OF BINDING	1.4602e-20	0.20212	0.20436	1	1
4	REACTOME P53 INDEPENDENT G1 S DNA DAMAGE CHECKPOINT	7.939e-20	0.20151	0.19182	1	1
4	REGULATION OF MAP KINASE ACTIVITY	6.7712e-18	0.20148	0.1994	1	1
4	SA PTEN PATHWAY	2.596e-32	0.20128	0.24301	1	1
4	CALCIUM ION TRANSMEMBRANE TRANSPORTER ACTIVITY	1.921e-11	0.20084	0.23547	1	1
4	REACTOME TIE2 SIGNALING	1.7137e-15	0.20025	0.1996	1	1
4	REACTOME SIGNALING BY SCF KIT	3.8684e-39	0.19982	0.21377	1	1
4	REGULATION OF MITOTIC CELL CYCLE	8.6163e-13	0.19973	0.19002	1	1
4	PID S1P META PATHWAY	2.941e-12	0.1996	0.19511	1	1
4	PID ALK1PATHWAY	6.3654e-16	0.1989	0.18955	1	1
4	REACTOME CDT1 ASSOCIATION WITH THE CDC6 ORC ORIGIN COMPLEX	2.0846e-18	0.19849	0.19092	1	1
4	REACTOME P53 DEPENDENT G1 DNA DAMAGE RESPONSE	4.7925e-21	0.19848	0.1772	1	1
4	REACTOME TRANSCRIPTIONAL ACTIVITY OF SMAD2 SMAD3 SMAD4 HETEROTRIMER	1.2656e-30	0.19815	0.22211	1	1
4	PROTEIN EXPORT FROM NUCLEUS	4.5012e-27	0.198	0.22611	1	1
4	REACTOME SEMA3A PLEXIN REPULSION SIGNALING BY INHIBITING INTEGRIN ADHESION	5.8659e-14	0.19799	0.21342	1	1
4	LATE ENDOSOME	1.2565e-23	0.19787	0.23737	1	1
[truncated: 2,582 more rows]

## Sheet: All 6 cancer types (individual genes)
archetype #	Feature Name	P value (Mann-Whitney)	Median Difference	Mean Difference	Significant after Benjamini-Hochberg correction?	Is first bin maximal?
1	FLJ45983	1.9954e-21	2.0546	1.6426	1	1
1	EEF1A2	8.5133e-11	2.0404	1.3728	1	1
1	DIO1	2.9436e-16	1.9265	1.968	1	1
1	MYT1	6.3418e-18	1.8796	1.8998	1	1
1	LRP2	1.6849e-12	1.8775	1.6744	1	1
1	AGR3	0.00039311	1.7972	1.056	1	1
1	SPAG17	1.8263e-08	1.7322	0.97677	1	1
1	ESR1	2.6408e-12	1.7298	1.2413	1	1
1	ERBB4	1.3724e-17	1.7182	1.4902	1	1
1	RPS6KA6	1.7461e-28	1.6891	1.5536	1	1
1	SYT9	1.793e-08	1.5547	1.0748	1	1
1	C10orf82	2.47e-05	1.5229	0.9081	1	1
1	BCAS1	1.1502e-11	1.5195	1.3967	1	1
1	?|652919	0.00051728	1.5131	0.70448	1	1
1	CHAD	1.2181e-13	1.5095	1.2181	1	1
1	PAH	1.0917e-10	1.494	1.4512	1	1
1	KLHDC7A	1.5427e-08	1.4934	1.1207	1	1
1	HMGCS2	1.2718e-07	1.4552	1.5031	1	1
1	CACNA1D	4.2955e-24	1.4342	1.4423	1	1
1	AR	1.8572e-11	1.4214	1.2151	1	1
1	CACNA2D2	6.9157e-19	1.4	1.3152	1	1
1	TBX3	2.4588e-29	1.3949	1.2647	1	1
1	FAM155B	4.7385e-14	1.3825	1.2004	1	1
1	RASEF	9.2609e-27	1.3782	1.3641	1	1
1	SLC27A2	4.5844e-21	1.3718	1.5574	1	1
1	FOXA1	3.7268e-32	1.3547	1.4968	1	1
1	ADCY1	2.1352e-06	1.35	0.87787	1	1
1	GPR81	2.3812e-13	1.3499	1.0198	1	1
1	UPF0639	5.5509e-14	1.3447	1.1924	1	1
1	KIAA1467	2.1227e-30	1.3363	1.3914	1	1
1	PLA2G4F	3.9336e-15	1.3305	0.94711	1	1
1	LONRF2	1.288e-12	1.3285	1.0324	1	1
1	KSR2	2.2898e-19	1.3186	1.3353	1	1
1	CASKIN1	2.3132e-17	1.279	1.0907	1	1
1	MAPT	8.0269e-14	1.2678	1.0847	1	1
1	SCNN1G	8.9819e-09	1.2612	0.9925	1	1
1	SYT13	0.00086156	1.2568	0.89787	1	1
1	SNORD116-4	6.2957e-10	1.251	0.97301	1	1
1	FREM2	0.02936	1.2273	0.5077	1	1
1	CA12	4.2781e-08	1.2246	0.8014	1	1
1	CAPN13	3.3741e-12	1.2114	1.057	1	1
1	KIF5C	2.3532e-13	1.2031	1.1009	1	1
1	WDR72	2.0571e-05	1.1985	0.74947	1	1
1	TOX3	4.2808e-14	1.1856	1.506	1	1
1	C9orf152	4.8235e-15	1.1586	1.1949	1	1
1	PAR5	2.806e-10	1.1566	0.73164	1	1
1	AGR2	2.7951e-06	1.1484	0.886	1	1
1	KIAA1984	3.1159e-17	1.1465	1.1538	1	1
1	GATA3	4.9396e-17	1.1419	0.8791	1	1
1	KIF12	1.861e-07	1.1366	0.81496	1	1
1	SNORD116-28	1.9509e-13	1.1334	0.90412	1	1
1	SLC1A2	5.2854e-13	1.1296	1.3724	1	1
1	CECR2	6.1283e-06	1.1253	0.88876	1	1
1	KLHL11	4.5413e-26	1.116	1.0542	1	1
1	DPY19L2P4	1.0902e-07	1.1157	0.92816	1	1
1	CYP4B1	1.7212e-07	1.1113	1.1963	1	1
1	PHGR1	2.3268e-16	1.1102	1.8594	1	1
1	FGFR3	4.0033e-09	1.1058	0.95001	1	1
1	SCUBE2	2.1354e-07	1.1031	1.0769	1	1
1	SLC16A6	3.2728e-11	1.1022	1.0499	1	1
1	RNF157	8.1145e-11	1.0919	0.92234	1	1
1	SPTBN4	1.8041e-12	1.088	0.99642	1	1
1	SLC44A4	4.674e-10	1.0837	1.0655	1	1
1	LOC100132354	9.5995e-13	1.0829	1.0564	1	1
1	SYBU	8.451e-20	1.0825	1.0265	1	1
1	ANO5	0.00019209	1.0793	0.66614	1	1
1	PCP2	6.4166e-15	1.0676	0.99797	1	1
1	PLIN5	1.0118e-07	1.0656	0.7317	1	1
1	LYPD6B	6.8339e-11	1.0589	0.87308	1	1
1	TTC36	1.1698e-13	1.0472	1.2186	1	1
1	IGDCC3	0.0040371	1.0466	0.78077	1	1
1	UGT2B15	3.8144e-07	1.03	1.372	1	1
1	KCND3	1.6315e-06	1.0268	0.86148	1	1
1	HIST4H4	5.8177e-25	1.0241	1.0182	1	1
1	DNALI1	4.3355e-11	1.0226	0.81933	1	1
1	GDPD1	1.4502e-33	1.0222	1.1116	1	1
1	FBXO15	4.409e-16	1.0114	0.9358	1	1
1	FSTL4	1.6565e-08	1.0047	0.9362	1	1
1	DYNLRB2	1.4612e-18	1.0031	0.9752	1	1
1	LYPD6	1.0163e-11	0.9985	1.0041	1	1
1	TMEM232	1.8859e-15	0.9894	0.89656	1	1
1	VIPR1	1.0133e-16	0.9891	0.99779	1	1
1	ACADSB	2.73e-33	0.9839	1.1401	1	1
1	BCL2	1.7739e-13	0.9753	0.71024	1	1
1	ASB16	1.1486e-31	0.9719	1.1255	1	1
1	RIMKLA	5.0385e-08	0.9662	0.65419	1	1
1	ABAT	6.6683e-13	0.9623	0.84379	1	1
1	ATP8B1	1.2586e-33	0.96	0.961	1	1
1	PLEKHH1	9.275e-20	0.959	0.80488	1	1
1	KIAA1244	6.1806e-16	0.9548	0.97043	1	1
1	TRIM58	0.013528	0.9545	0.40017	1	1
1	C6orf97	5.8095e-10	0.9545	0.83375	1	1
1	ARSG	7.4983e-21	0.9529	0.91668	1	1
1	LRFN2	1.119e-08	0.9524	0.85427	1	1
1	MLPH	4.3297e-13	0.9511	0.83062	1	1
1	ZNF396	1.9074e-41	0.9492	0.92745	1	1
1	ITPR1	2.38e-09	0.9457	0.73804	1	1
1	C3orf15	3.0415e-09	0.9454	0.77836	1	1
1	FAM190A	8.2841e-08	0.9445	0.49563	1	1
1	KIAA2022	2.8611e-05	0.942	0.54739	1	1
1	ZSWIM5	4.862e-15	0.9406	0.86796	1	1
1	MYCBPAP	5.3938e-10	0.9388	0.71888	1	1
1	C17orf57	1.6497e-17	0.9373	0.86559	1	1
1	DPY19L2P1	3.6458e-07	0.9277	0.73708	1	1
1	AZGP1	2.4286e-09	0.9277	1.0576	1	1
1	LDHD	7.0873e-13	0.9264	0.85304	1	1
1	DEGS2	4.3124e-15	0.9256	1.1452	1	1
1	GLS2	2.0785e-10	0.9206	0.78394	1	1
1	ATP2C2	1.2108e-10	0.9069	0.8978	1	1
1	NME5	9.4628e-08	0.9047	0.64701	1	1
1	INPP5J	1.7216e-13	0.9044	0.85094	1	1
1	AKR7A3	2.9475e-12	0.9017	1.2923	1	1
1	MMEL1	2.0401e-06	0.8999	0.70967	1	1
1	PKIB	6.2745e-05	0.8982	0.51212	1	1
1	ESRRG	8.0424e-06	0.8971	0.57505	1	1
1	LRRC50	6.3692e-09	0.8962	0.90658	1	1
1	TBC1D9	7.7312e-18	0.8961	0.928	1	1
1	CLUL1	1.1169e-08	0.8912	0.64248	1	1
1	FBP1	3.0493e-17	0.8911	0.92691	1	1
1	OR7E91P	2.6089e-07	0.8875	0.63847	1	1
1	KIAA1324L	4.3755e-13	0.8869	0.70848	1	1
1	VAV3	9.4601e-09	0.8869	0.60828	1	1
1	CES8	1.0825e-09	0.8857	0.58624	1	1
1	RHBG	4.0366e-07	0.8828	0.96389	1	1
1	RAB19	2.78e-17	0.8826	0.80414	1	1
1	NBPF4	5.8414e-09	0.8814	1.1738	1	1
1	ESM1	9.1328e-11	0.881	0.68688	1	1
1	SNURF	3.935e-15	0.8766	0.79042	1	1
1	CTNND2	0.0058741	0.876	0.45964	1	1
1	ALDH6A1	2.298e-24	0.8712	0.83755	1	1
1	FCRLB	1.0758e-07	0.866	1.1238	1	1
1	ASTN2	1.9954e-16	0.8654	0.93828	1	1
1	ZSCAN1	0.00062713	0.8653	0.42349	1	1
1	MYO18B	0.00012552	0.8631	0.65741	1	1
1	CDON	2.2893e-06	0.8553	0.37724	1	1
1	EFCAB6	4.6616e-13	0.8528	0.66769	1	1
1	C1orf88	1.7253e-10	0.8522	0.7276	1	1
1	ITIH5L	1.4849e-11	0.8514	0.85305	1	1
1	STRC	6.6105e-09	0.8512	0.60704	1	1
1	TDH	1.5633e-07	0.8504	0.83457	1	1
1	DNASE1L2	1.1074e-06	0.8461	0.53077	1	1
1	FHIT	1.9292e-15	0.8441	0.72858	1	1
1	DNAH7	2.2432e-14	0.8396	0.84247	1	1
1	FBLL1	0.00092903	0.8387	0.57049	1	1
1	KIAA1257	1.3892e-06	0.8379	0.54422	1	1
1	KIAA1324	8.0477e-06	0.8378	0.63367	1	1
1	ANKRD20B	2.8731e-12	0.8344	0.77275	1	1
1	RIMS4	0.0015549	0.834	0.71182	1	1
1	C14orf50	0.00025536	0.8336	0.51219	1	1
1	LOC148696	5.229e-15	0.8301	0.86841	1	1
1	FAM63A	1.6883e-36	0.829	0.80368	1	1
1	FSIP1	3.0415e-09	0.8284	0.95665	1	1
1	CCDC11	2.4629e-18	0.8258	0.7802	1	1
1	LRRIQ3	2.9599e-14	0.8249	0.6931	1	1
1	CASC1	5.3475e-13	0.8232	0.75025	1	1
1	FAM47E	1.2565e-22	0.8217	0.91039	1	1
1	C9orf122	2.4439e-05	0.8204	0.53932	1	1
1	SCNN1B	0.00033091	0.8184	0.49661	1	1
1	GSTM3	1.5574e-06	0.8165	0.72164	1	1
1	SYT7	2.59e-07	0.8155	0.47422	1	1
1	ENO2	3.0958e-11	0.8154	0.57675	1	1
1	TNNI3K	1.3029e-07	0.8147	0.6734	1	1
1	FMO5	1.9333e-10	0.8146	0.88193	1	1
1	FAM154B	3.1941e-10	0.8133	0.68552	1	1
1	C20orf151	1.2907e-13	0.8133	0.66742	1	1
1	WDR65	1.2772e-12	0.8132	0.87976	1	1
1	DCDC1	7.6126e-11	0.8123	0.78899	1	1
1	SRMS	5.9324e-13	0.8119	0.85011	1	1
1	MSX2	3.2762e-07	0.8116	0.6548	1	1
1	EFCAB4B	0.00012805	0.8116	0.37381	1	1
1	ZNF214	3.1212e-14	0.8108	0.67704	1	1
1	TMEM145	4.6632e-09	0.8064	1.1969	1	1
1	LMX1B	0.00050576	0.8042	0.5209	1	1
1	WNT3	4.6185e-11	0.8041	0.63311	1	1
1	POLI	6.9236e-35	0.8038	0.73152	1	1
1	FRMPD2	6.5883e-08	0.8028	0.73695	1	1
1	FAAH	4.1453e-27	0.8015	0.82034	1	1
1	HEPACAM2	1.299e-07	0.798	1.1478	1	1
1	MAGI1	4.1166e-30	0.7944	0.87169	1	1
1	CCNB3	1.5987e-17	0.794	0.88767	1	1
1	CNTN3	0.063313	0.7911	0.23294	1	1
1	WDR17	0.00026196	0.7908	0.77687	1	1
1	LCOR	1.2108e-13	0.7902	0.7549	1	1
1	NRXN3	0.0052715	0.7893	0.42265	1	1
1	PRR15	2.9126e-07	0.7893	0.59954	1	1
1	?|90288	1.5835e-07	0.7877	0.70571	1	1
1	KIF6	6.5786e-09	0.7871	0.6733	1	1
1	SLC7A4	0.014115	0.7865	0.627	1	1
1	ANKRD24	3.0858e-13	0.7863	0.7688	1	1
1	DACH1	1.0855e-09	0.7839	0.99932	1	1
1	RERG	2.992e-05	0.7819	0.48721	1	1
1	GDF15	3.3581e-05	0.7792	0.65733	1	1
1	NUDT16P1	2.1783e-15	0.7791	0.68608	1	1
1	RAP1GAP	1.0615e-11	0.7783	0.77156	1	1
1	CAPS2	3.3159e-14	0.7769	0.70789	1	1
1	VWA3A	1.1777e-07	0.7752	0.71143	1	1
1	SSPO	1.7218e-07	0.7745	0.77727	1	1
1	PEX5L	1.2316e-13	0.773	1.3679	1	1
1	IQCH	1.5466e-25	0.7719	0.8294	1	1
1	C10orf116	0.00014438	0.7718	0.47718	1	1
1	LOC100131193	3.7466e-21	0.7705	0.79739	1	1
1	C11orf35	6.9825e-13	0.769	0.65893	1	1
1	IRS1	6.9306e-13	0.769	0.54708	1	1
1	ALDH5A1	5.8138e-27	0.7681	0.82239	1	1
1	GLRB	0.00016922	0.7679	0.47465	1	1
1	CXorf57	3.4492e-06	0.7671	0.53608	1	1
1	SLC19A2	1.6851e-18	0.7658	0.71479	1	1
1	TFF1	0.0082162	0.7658	0.80655	1	1
1	HAPLN1	0.0021006	0.7648	0.42322	1	1
1	KCNJ11	1.0976e-11	0.763	0.80841	1	1
1	WDR31	1.1e-17	0.7629	0.81233	1	1
1	NSUN7	4.9309e-08	0.7629	0.31309	1	1
1	STEAP2	1.7251e-07	0.7618	0.61317	1	1
1	ENPP5	2.3489e-10	0.7604	0.69935	1	1
1	IGSF9B	1.7336e-07	0.7588	0.7399	1	1
1	FAM174B	9.4521e-18	0.7584	0.70536	1	1
1	FLJ44606	1.5582e-16	0.7567	0.65551	1	1
1	TMEM56	4.1461e-14	0.7557	0.7311	1	1
1	LMBRD2	1.7764e-18	0.7485	0.75443	1	1
1	DUSP15	0.014289	0.7478	0.25019	1	1
1	GCLC	2.6352e-20	0.7465	0.7373	1	1
1	SPIRE2	5.072e-12	0.7462	0.69859	1	1
1	GRM3	5.3366e-14	0.7443	0.76237	1	1
1	IPW	6.1695e-09	0.7443	0.47167	1	1
1	MYEF2	1.3929e-10	0.7437	0.63468	1	1
1	LIN7A	5.3372e-05	0.7433	0.65645	1	1
1	OVGP1	2.4462e-09	0.7424	0.67602	1	1
1	ZNF43	6.7344e-12	0.7412	0.4641	1	1
1	ENPP4	7.2082e-21	0.7403	0.71282	1	1
1	FAM134B	2.2492e-09	0.7395	0.68705	1	1
1	FOXJ1	0.024599	0.7395	0.50422	1	1
1	DOC2A	9.8619e-06	0.7378	0.65126	1	1
1	TTC23L	2.34e-14	0.7371	0.75666	1	1
1	RGL3	1.1368e-08	0.7364	0.80004	1	1
1	FAM57B	2.5739e-07	0.7355	0.89342	1	1
1	SNORD116-20	6.8031e-09	0.7338	0.59846	1	1
1	SYT17	6.1036e-08	0.7318	0.38318	1	1
1	GARNL3	2.3787e-16	0.7297	0.66877	1	1
1	RAB26	1.246e-07	0.7289	0.59417	1	1
1	ACER2	1.1749e-15	0.7279	1.0615	1	1
1	EDA	0.00037107	0.727	0.37004	1	1
1	TMC4	9.8103e-19	0.726	0.66226	1	1
1	RORC	3.0601e-12	0.7245	0.85066	1	1
1	GPR160	1.9264e-15	0.7237	0.79674	1	1
1	BTBD8	3.9633e-11	0.7225	0.72803	1	1
1	C16orf71	3.0076e-13	0.7222	0.67577	1	1
1	C9orf43	1.316e-12	0.7188	0.62767	1	1
1	AGAP11	1.1052e-07	0.7184	0.70057	1	1
1	SPEF2	2.0043e-10	0.7173	0.56431	1	1
1	GPD1L	1.7724e-21	0.7171	0.77413	1	1
1	DDI2	1.8313e-13	0.7171	0.81915	1	1
1	DKFZp686O24166	3.7398e-09	0.7171	0.7426	1	1
1	TMPRSS6	0.011828	0.7162	0.298	1	1
1	HTR7P1	1.1077e-16	0.7158	0.88076	1	1
1	RASSF6	0.00013276	0.7144	0.50133	1	1
1	C9orf68	2.2138e-10	0.7138	0.67997	1	1
1	PCLO	3.8454e-08	0.7128	0.615	1	1
1	KLHL23	8.7226e-14	0.7123	0.7295	1	1
1	AFF3	0.00033172	0.7118	0.63871	1	1
1	SYDE2	1.4373e-21	0.7107	0.86337	1	1
1	TPPP	2.0571e-07	0.7099	0.67509	1	1
1	SYNGR1	7.2331e-09	0.7081	0.5175	1	1
1	C20orf26	2.6167e-08	0.7072	0.79555	1	1
1	EME2	6.7476e-10	0.7058	0.60729	1	1
1	SULT1A1	5.192e-09	0.7054	0.57145	1	1
1	ZNF844	1.1268e-21	0.7049	0.74519	1	1
1	MASP2	2.5472e-14	0.7035	0.74262	1	1
1	PAR-SN	1.7902e-10	0.7018	0.49452	1	1
1	RAB3A	1.1339e-17	0.701	0.69187	1	1
1	NMNAT3	9.0551e-07	0.7	0.36929	1	1
1	PRKAA2	0.00026363	0.6998	0.30551	1	1
1	RGS22	9.9232e-07	0.6998	1.1008	1	1
1	CGN	5.3222e-17	0.6992	0.83709	1	1
1	HIST2H2BE	4.1716e-11	0.6988	0.63435	1	1
1	ZNF483	1.0267e-11	0.6979	0.68156	1	1
1	LMTK2	1.4474e-15	0.6979	0.71449	1	1
1	ENTPD5	2.5547e-17	0.697	0.86458	1	1
1	MPP2	2.0078e-06	0.6961	0.56152	1	1
1	EPN3	2.04e-11	0.6956	0.62996	1	1
1	ANKS1B	7.5003e-07	0.6953	0.66061	1	1
1	KLF15	3.7882e-06	0.6951	0.48735	1	1
1	PAX2	3.6244e-06	0.6947	0.79406	1	1
1	WDR52	1.9191e-13	0.6942	0.6387	1	1
1	C14orf174	4.1634e-16	0.6936	0.74451	1	1
1	CAPN8	0.00076518	0.6931	0.78823	1	1
1	ANXA9	8.7226e-13	0.6924	0.92037	1	1
1	NUDT12	1.1604e-24	0.6908	0.68937	1	1
1	RNF128	1.112e-09	0.69	0.91272	1	1
1	HIST2H2BA	9.3277e-10	0.689	0.59366	1	1
1	ZNF493	2.3956e-23	0.6863	0.73732	1	1
1	OCLN	4.9675e-16	0.6853	0.74197	1	1
1	PARD6B	6.3835e-14	0.6849	0.78034	1	1
1	THSD4	7.2905e-09	0.6845	0.71105	1	1
1	PPM1H	1.7718e-11	0.6841	0.5554	1	1
1	ALOX12P2	0.07232	0.6822	0.16969	1	1
1	BCAT2	2.5759e-20	0.6819	0.66962	1	1
1	RAB17	1.0953e-19	0.6818	0.74915	1	1
1	C15orf33	4.0682e-15	0.6817	0.56451	1	1
1	MAOA	9.7306e-11	0.6817	0.84677	1	1
1	TSGA10	2.9248e-19	0.6811	0.63632	1	1
1	SFXN2	5.7772e-15	0.6809	0.61149	1	1
1	THRB	3.3942e-12	0.6808	0.65868	1	1
1	ABCA5	7.907e-15	0.6807	0.6543	1	1
1	NECAB3	5.4867e-21	0.6802	0.73812	1	1
1	ZKSCAN1	9.8159e-20	0.6802	0.717	1	1
1	RNF43	4.0374e-08	0.6796	0.53157	1	1
1	NEDD4L	5.8345e-21	0.6789	0.70485	1	1
1	KLHDC9	2.4203e-13	0.678	0.68112	1	1
1	ACSF2	2.8777e-10	0.6776	0.42922	1	1
1	MSI2	2.5453e-18	0.6774	0.56323	1	1
1	WFIKKN1	3.2922e-08	0.6773	0.64315	1	1
1	ZNF737	7.1032e-16	0.6751	0.94043	1	1
1	MCCC2	1.364e-28	0.6748	0.74792	1	1
1	ABHD1	3.1403e-07	0.6742	0.60936	1	1
1	MARVELD2	2.3296e-32	0.6724	0.69076	1	1
1	DISP2	0.00017067	0.6722	0.66937	1	1
1	ZMAT1	2.312e-08	0.6719	0.60477	1	1
1	TOM1L1	1.7283e-25	0.6718	0.7399	1	1
1	C17orf28	7.0715e-15	0.6713	0.7079	1	1
1	CYB5D1	6.25e-19	0.671	0.50619	1	1
1	ZNF91	8.5079e-28	0.6702	0.75835	1	1
1	PGLYRP2	3.2246e-06	0.6698	0.81635	1	1
1	GPR27	1.2829e-05	0.6698	0.46932	1	1
1	CHDH	4.1801e-14	0.6643	0.68846	1	1
1	PRLR	2.4868e-07	0.6641	0.77093	1	1
1	BSN	6.2723e-11	0.6639	0.87608	1	1
1	P4HTM	3.6166e-31	0.6635	0.82864	1	1
1	FGF12	7.391e-05	0.6629	0.73229	1	1
1	ILDR1	7.4457e-21	0.6624	0.62558	1	1
1	C19orf45	3.2901e-08	0.6619	0.64666	1	1
1	CLMN	2.1302e-13	0.6613	0.55504	1	1
1	GNMT	1.1023e-07	0.6599	0.77956	1	1
1	ZSCAN12P1	4.4469e-10	0.6591	0.57753	1	1
1	TOB1	1.8205e-19	0.6587	0.71468	1	1
1	GLIPR1L2	3.8229e-09	0.6585	0.63438	1	1
1	VEGFA	3.0677e-15	0.6573	0.62282	1	1
1	PPP1R9A	9.2932e-09	0.6569	0.53805	1	1
1	SLC26A1	2.9849e-15	0.6567	0.65704	1	1
1	ZNF233	2.4715e-10	0.6556	0.50333	1	1
1	SPAG1	4.6099e-15	0.6552	0.59822	1	1
1	SORD	1.4335e-14	0.6549	0.61434	1	1
1	AMIGO1	9.2627e-15	0.6546	0.58128	1	1
1	CCDC39	2.3334e-12	0.6527	0.67885	1	1
1	PPP1R3C	0.00047782	0.6527	0.45164	1	1
1	AKR7L	1.1548e-10	0.6521	0.78668	1	1
1	HHAT	2.927e-18	0.652	0.64987	1	1
1	UHMK1	3.7107e-08	0.6519	0.65646	1	1
1	C20orf94	6.4417e-15	0.6517	0.66236	1	1
1	CYFIP2	3.5103e-12	0.6499	0.59496	1	1
1	NBEA	0.0014139	0.6496	0.22895	1	1
1	SLC35E2	1.6996e-15	0.6486	0.64626	1	1
1	PCSK4	1.496e-08	0.6485	0.58882	1	1
1	CCDC40	2.8113e-13	0.6479	0.62184	1	1
1	CYB5A	6.2832e-15	0.6474	0.6363	1	1
1	RALGPS1	4.186e-24	0.6471	0.61629	1	1
1	PRTG	0.00025693	0.6466	0.48254	1	1
1	LOC646471	7.9646e-18	0.6463	0.70969	1	1
1	NOVA1	0.0018994	0.646	0.83941	1	1
1	GRAMD1C	1.0902e-11	0.6448	0.58587	1	1
1	ATP1A4	3.9472e-06	0.6424	0.81947	1	1
1	CLCN3	2.9462e-25	0.6422	0.67078	1	1
1	HIST1H2AC	2.3513e-08	0.6412	0.49566	1	1
1	MAP9	5.6427e-05	0.6405	0.072572	1	1
1	BAI2	0.0001674	0.6397	0.47967	1	1
1	?|100133144	9.4722e-08	0.6375	0.47098	1	1
1	FBXO36	2.5418e-16	0.6366	0.58291	1	1
1	SALL2	1.6921e-13	0.6361	0.63241	1	1
1	SPATA4	1.3032e-13	0.636	0.87848	1	1
1	BMPR1B	0.020287	0.6355	0.79093	1	1
1	NKAIN1	2.8144e-05	0.6349	0.78942	1	1
1	PPP1R3E	1.7918e-18	0.6344	0.58814	1	1
1	KILLIN	4.936e-17	0.6336	0.5574	1	1
1	ZNF573	4.3856e-14	0.6326	0.54569	1	1
1	TRAM1L1	4.3241e-13	0.6319	0.50058	1	1
1	TMEM144	2.6735e-15	0.6301	0.63296	1	1
1	LOC100131434	1.4214e-08	0.6294	0.56773	1	1
1	NUP62CL	3.5323e-10	0.6293	0.57021	1	1
1	LRBA	8.0173e-25	0.6292	0.67255	1	1
1	CYP4X1	0.0066715	0.6291	0.4418	1	1
1	ZNF717	3.9059e-18	0.6288	0.56961	1	1
1	MYO5C	2.4094e-17	0.6281	0.64549	1	1
1	COX6C	3.8887e-12	0.6278	0.73973	1	1
1	PION	2.3054e-15	0.6273	0.50259	1	1
1	LOC100272228	1.6387e-08	0.6271	0.57101	1	1
1	MAPK8IP2	0.00017629	0.627	0.49455	1	1
1	FAM73A	2.5456e-22	0.6268	0.68839	1	1
1	ZNF625	3.9935e-14	0.6262	0.52993	1	1
1	CNTD2	0.00062274	0.6261	0.46084	1	1
1	RPH3AL	4.2202e-14	0.6258	0.63358	1	1
1	DNAJA4	3.3195e-10	0.6239	0.46657	1	1
1	ZNF680	1.0328e-22	0.6224	0.60385	1	1
1	RSPH1	4.0969e-05	0.6222	0.4287	1	1
1	AGBL4	1.8565e-06	0.6201	0.4907	1	1
1	MYB	8.4797e-06	0.6197	0.42855	1	1
1	C1orf192	2.7837e-11	0.6195	0.59596	1	1
1	KLHDC1	1.3347e-14	0.6174	0.58875	1	1
1	ABLIM3	2.0496e-06	0.6167	0.49951	1	1
1	LOC100144604	5.745e-05	0.6157	0.71855	1	1
1	MAN1C1	1.2186e-05	0.6155	0.53315	1	1
1	LOC647859	0.008236	0.6148	0.35573	1	1
1	CLCNKA	2.0882e-05	0.6148	0.5919	1	1
1	ZNF552	8.4737e-15	0.6147	0.68363	1	1
1	ZNF429	7.2645e-23	0.6145	0.60743	1	1
1	LOC100286844	2.5641e-25	0.6139	0.65362	1	1
1	LOC158572	8.4028e-20	0.6126	0.4871	1	1
1	BTNL9	0.00036938	0.6126	0.50371	1	1
1	DNAH5	0.0013049	0.612	0.43583	1	1
1	CASZ1	4.9642e-15	0.612	0.54899	1	1
1	KIAA0802	1.9046e-07	0.6119	0.5432	1	1
1	LEKR1	1.7174e-15	0.611	0.55445	1	1
1	MFSD6L	0.0020534	0.611	0.28126	1	1
1	HIST1H2AK	4.087e-08	0.6105	0.48955	1	1
1	ACBD4	6.4803e-15	0.6103	0.55353	1	1
1	CYB5D2	2.1484e-20	0.6095	0.63735	1	1
1	KIAA1109	2.7283e-26	0.6083	0.62532	1	1
1	LOC653501	6.265e-19	0.608	0.58654	1	1
1	IL6ST	7.3324e-06	0.6078	0.72643	1	1
1	PLA2G6	2.2823e-12	0.6067	0.53215	1	1
1	C16orf3	3.5009e-13	0.6055	0.57537	1	1
1	FLJ36777	1.6086e-11	0.6052	0.60932	1	1
1	CT62	1.9374e-05	0.6049	0.59489	1	1
1	PRR15L	1.9091e-08	0.6044	0.60341	1	1
1	NEK5	7.2626e-09	0.6043	0.65601	1	1
1	C9orf172	2.4075e-06	0.6039	0.53322	1	1
1	UBXN10	1.6911e-07	0.6031	0.69047	1	1
1	FRY	9.3943e-16	0.6023	0.80621	1	1
1	GATM	6.5799e-05	0.6021	0.43806	1	1
1	RHBDL1	1.5355e-06	0.601	0.57947	1	1
1	ZNF829	1.8031e-10	0.6001	0.50043	1	1
1	C3orf18	1.0297e-10	0.5982	0.46775	1	1
1	KIAA1107	8.0913e-17	0.5969	0.57978	1	1
1	IVD	2.5652e-28	0.5968	0.6093	1	1
1	MED12L	5.5739e-05	0.5962	0.55959	1	1
1	NCOA2	3.4872e-12	0.5958	0.7772	1	1
1	C7orf63	1.8595e-12	0.5958	0.67496	1	1
1	SLC5A7	2.0021e-08	0.5956	1.2937	1	1
1	LOC80054	8.102e-09	0.5951	0.56408	1	1
1	ABCD3	1.1714e-22	0.5938	0.65185	1	1
1	APH1B	1.315e-17	0.5938	0.52535	1	1
1	BDH1	4.633e-16	0.5936	0.59148	1	1
1	UNC119B	2.26e-11	0.5933	0.40006	1	1
1	SLC39A6	3.2615e-19	0.5932	0.97064	1	1
1	SLC22A5	9.3282e-30	0.5928	0.70946	1	1
1	SLC46A1	4.2964e-19	0.5925	0.61793	1	1
1	QDPR	1.7904e-12	0.5925	0.60378	1	1
1	CDYL2	1.7275e-05	0.5924	0.44974	1	1
1	CCDC110	0.00093051	0.5923	0.21883	1	1
1	SCAND3	0.016053	0.5921	0.15846	1	1
1	RG9MTD2	1.6785e-35	0.5919	0.60911	1	1
1	LOC730101	1.8511e-11	0.5919	0.68039	1	1
1	SHANK2	3.7051e-13	0.5916	0.72025	1	1
1	FSCN2	4.4921e-13	0.5911	0.69486	1	1
1	HIST1H2BC	3.3123e-05	0.5902	0.54316	1	1
1	ERN1	2.8745e-10	0.5899	0.68831	1	1
1	CYP2C8	0.00012622	0.5894	0.69035	1	1
1	SPEF1	0.00028532	0.5868	0.46205	1	1
1	ATAD3C	0.018049	0.5861	0.19506	1	1
1	RUNDC1	1.8332e-37	0.5846	0.58488	1	1
1	XBP1	1.5957e-17	0.5845	0.70402	1	1
1	PLA2G12A	8.1201e-39	0.5845	0.62319	1	1
1	EPHA10	0.0033723	0.5842	0.34394	1	1
1	MOAP1	5.5711e-39	0.584	0.62565	1	1
1	ZADH2	3.2187e-23	0.5836	0.478	1	1
1	ZFP2	7.7167e-14	0.5825	0.49533	1	1
1	LOC100170939	5.3852e-11	0.5825	0.71849	1	1
1	PTPRN2	0.0019665	0.5806	0.7202	1	1
1	PLCD4	1.1429e-09	0.5804	0.66902	1	1
1	NEBL	1.0557e-06	0.5803	0.20122	1	1
1	TDRD5	0.00011052	0.5798	0.44568	1	1
1	TMEM192	1.2808e-28	0.5795	0.57365	1	1
1	HIST1H3E	1.8737e-06	0.5792	0.42159	1	1
1	MAML3	3.142e-17	0.5789	0.60462	1	1
1	TTC30A	1.942e-17	0.5787	0.55352	1	1
1	CCT6B	2.2897e-08	0.5787	0.44058	1	1
1	N4BP2	1.0897e-09	0.5785	0.64428	1	1
1	GSTM2	0.0030775	0.5773	0.37836	1	1
1	RBM11	5.1039e-07	0.577	0.49008	1	1
1	PODXL2	0.00020113	0.5768	0.30601	1	1
1	CCDC160	0.00037372	0.5765	0.33262	1	1
1	ZNF192	1.6543e-14	0.5763	0.75066	1	1
1	BRSK2	0.032878	0.5762	0.64662	1	1
1	C2orf15	7.3611e-21	0.5761	0.61865	1	1
1	GAMT	3.0042e-06	0.5753	0.30797	1	1
1	LOC284232	2.8689e-16	0.5752	0.6643	1	1
1	C21orf15	0.013187	0.5744	0.48204	1	1
1	C11orf52	5.7544e-12	0.5742	0.53767	1	1
1	DGKE	4.4422e-15	0.574	0.57325	1	1
1	ANKRD46	1.0067e-19	0.5723	0.54873	1	1
1	RGNEF	1.8401e-10	0.5703	0.59278	1	1
1	GTF2IRD2B	1.0047e-15	0.5694	0.51399	1	1
1	RIBC1	1.6287e-12	0.5683	0.56313	1	1
1	TRERF1	7.3537e-06	0.5682	0.24569	1	1
1	LOC100130987	4.3323e-15	0.5682	0.58714	1	1
1	CDHR3	1.3745e-06	0.5682	0.85026	1	1
1	SOCS7	2.1122e-09	0.5678	0.54558	1	1
1	LRRC24	1.9488e-07	0.5664	0.6527	1	1
1	SRCIN1	3.0047e-10	0.5663	0.73342	1	1
1	TAOK1	3.4634e-07	0.566	0.54177	1	1
1	CARTPT	9.4281e-07	0.5645	1.6089	1	1
1	SUGT1L1	2.4147e-15	0.5632	0.58128	1	1
1	TSNAXIP1	2.7002e-05	0.5627	0.4708	1	1
1	MZF1	1.0932e-15	0.5609	0.46105	1	1
1	HIST1H1C	0.0041652	0.5607	0.27936	1	1
1	LOC400752	5.3121e-11	0.5597	0.45509	1	1
1	IGSF22	0.018856	0.5597	0.092354	1	1
1	TTC30B	1.8175e-22	0.5592	0.60515	1	1
1	GPLD1	1.4189e-06	0.5591	0.74349	1	1
1	TIGD4	2.6718e-14	0.5577	0.57123	1	1
1	ZDHHC11	2.5666e-05	0.5577	0.50278	1	1
1	CCNT1	2.7403e-09	0.557	0.65314	1	1
1	C1orf220	3.4411e-11	0.5568	0.62322	1	1
1	MAST4	3.5278e-11	0.5565	0.74244	1	1
1	DPY19L3	1.2303e-16	0.5565	0.66531	1	1
1	KCNC1	2.532e-07	0.5563	1.1434	1	1
1	B3GALNT1	2.5536e-11	0.5561	0.4955	1	1
1	CHADL	4.7092e-06	0.556	0.42621	1	1
1	C15orf56	3.7563e-05	0.5555	0.26678	1	1
1	SYCP2	0.00031725	0.5544	0.43893	1	1
1	HIST1H4H	0.0038518	0.5544	0.34749	1	1
1	C12orf72	5.2471e-21	0.5536	0.47144	1	1
1	PHLPP1	1.6438e-18	0.5524	0.4636	1	1
1	APOOL	3.8148e-13	0.5523	0.56454	1	1
1	PLS1	1.257e-13	0.552	0.64717	1	1
1	CBR4	2.5801e-22	0.5519	0.5313	1	1
1	SLC38A1	1.5376e-10	0.5519	0.32768	1	1
1	KIAA1530	1.837e-21	0.5517	0.55572	1	1
1	HOOK1	1.4506e-16	0.5515	0.58606	1	1
1	ATE1	1.7033e-15	0.5513	0.5813	1	1
1	TRIM2	8.2176e-06	0.5508	0.27051	1	1
1	HSPA4L	0.00096666	0.5504	0.3339	1	1
1	SLC16A5	0.00013661	0.5501	0.25283	1	1
1	KCTD6	2.8767e-20	0.5501	0.71254	1	1
1	TMEM30B	7.7732e-18	0.5494	0.54373	1	1
1	SYTL2	4.8164e-05	0.5494	0.43176	1	1
1	ANKRD20A4	1.8847e-07	0.5491	0.47204	1	1
1	SPATA6	6.0873e-11	0.5488	0.59263	1	1
1	ZNF221	1.8377e-09	0.5482	0.46688	1	1
1	ZNF709	3.3863e-21	0.5474	0.51047	1	1
1	PLA2G4D	1.7216e-06	0.5472	0.59265	1	1
1	MDH1B	2.6262e-07	0.5466	0.47821	1	1
1	C4orf12	3.4194e-11	0.5464	0.57639	1	1
1	LASS4	1.0504e-05	0.5463	0.070131	1	1
1	PRKAR2A	1.7326e-10	0.5457	0.5779	1	1
1	LCA5L	3.9391e-12	0.5456	0.42372	1	1
1	JAKMIP3	0.00047908	0.5452	0.46151	1	1
1	TNNC1	0.00014559	0.5451	0.46876	1	1
1	RTN4RL1	0.0017077	0.5449	0.33643	1	1
1	C9orf96	1.0064e-13	0.5448	0.56824	1	1
1	LOC100128640	1.6255e-11	0.5445	0.50614	1	1
1	ATP6V1G2	3.1197e-06	0.5437	0.50633	1	1
1	NOX5	0.001225	0.543	0.50113	1	1
1	KDM4B	1.7308e-18	0.5428	0.56132	1	1
1	ZNF587	4.0479e-21	0.5426	0.64727	1	1
1	NCRNA00095	6.9576e-13	0.5421	0.65687	1	1
1	C14orf148	4.343e-15	0.5418	0.56015	1	1
1	C3orf52	6.9715e-05	0.5417	0.31262	1	1
1	CCDC30	1.0068e-16	0.5414	0.54818	1	1
1	RSC1A1	3.9329e-14	0.541	0.51565	1	1
1	TTC8	1.3177e-26	0.5408	0.5604	1	1
1	MAPK8IP1	2.8687e-05	0.5405	0.35912	1	1
1	PEX12	8.2165e-27	0.5401	0.5368	1	1
1	IPP	2.3682e-19	0.5396	0.50593	1	1
1	MGC14436	1.9458e-09	0.5388	0.76966	1	1
1	C17orf82	1.2691e-05	0.5387	0.54244	1	1
1	MBLAC2	1.2228e-22	0.5386	0.52501	1	1
1	KIAA1370	1.6251e-18	0.5383	0.64924	1	1
1	HSD11B2	0.00069654	0.5381	0.41906	1	1
1	NOSTRIN	1.5281e-08	0.538	0.62584	1	1
1	MED13L	1.6816e-19	0.5369	0.6628	1	1
1	TXNDC6	1.1517e-11	0.5366	0.48278	1	1
1	KRBA2	3.423e-15	0.5366	0.61573	1	1
1	HIST2H4A	2.2426e-07	0.536	0.47034	1	1
1	GLYATL1	0.0017251	0.5354	0.37267	1	1
1	BNIPL	0.011067	0.5349	0.25247	1	1
1	TRIM66	2.2776e-15	0.5346	0.54	1	1
1	HEBP1	1.2181e-13	0.5339	0.67076	1	1
1	PTGR2	3.8077e-24	0.5332	0.55294	1	1
1	SOX2OT	2.4883e-10	0.5322	0.78481	1	1
1	LOC100303728	3.2195e-13	0.5321	0.46859	1	1
1	CCDC125	7.9125e-23	0.5315	0.59197	1	1
1	GRIK4	0.00053776	0.5312	0.64505	1	1
1	SLC26A5	8.8436e-06	0.5312	0.65427	1	1
1	ICA1L	3.8642e-09	0.5306	0.48352	1	1
1	WWP1	1.2093e-20	0.5304	0.68875	1	1
1	LOC202781	3.2119e-17	0.5299	0.55044	1	1
1	LRRC56	4.0051e-08	0.5297	0.50789	1	1
1	CCDC87	1.9773e-07	0.5297	0.44153	1	1
1	TCEAL1	5.6726e-19	0.5284	0.67502	1	1
1	ZFP14	3.0032e-23	0.5282	0.53245	1	1
1	ABCA3	3.1179e-05	0.528	0.30225	1	1
1	HPN	0.00022197	0.5279	0.48187	1	1
1	AQP11	2.0774e-14	0.5272	0.62877	1	1
1	WBSCR27	0.0054756	0.5267	0.32958	1	1
1	BZRAP1	1.2612e-05	0.5266	0.33249	1	1
1	MLLT3	2.2666e-05	0.5265	0.10389	1	1
1	ZNF813	2.3477e-08	0.5261	0.47231	1	1
1	KIAA1958	2.2667e-10	0.5256	0.54912	1	1
1	CYP3A5	9.4298e-11	0.5251	0.88886	1	1
1	POLN	5.9593e-07	0.5248	0.52596	1	1
1	TMEM170B	2.8371e-11	0.524	0.44301	1	1
1	ZNF441	2.5544e-21	0.524	0.52301	1	1
1	ZNF763	3.6968e-19	0.5237	0.57079	1	1
1	ARHGAP32	1.2096e-12	0.5235	0.49757	1	1
1	LOC100130581	1.3e-17	0.5233	0.55255	1	1
1	FLJ10661	1.634e-08	0.5233	0.51032	1	1
1	ZNF397	8.9537e-23	0.5231	0.49923	1	1
1	TTC14	4.9357e-13	0.5229	0.43682	1	1
1	KIAA1875	5.8415e-05	0.5228	0.44547	1	1
1	FBXL17	6.0683e-23	0.5223	0.4885	1	1
1	FAM63B	2.0863e-10	0.5214	0.55855	1	1
1	WDR78	1.0941e-08	0.5212	0.45562	1	1
1	C5orf30	6.2402e-09	0.5207	0.40381	1	1
1	CCDC103	3.9048e-09	0.5205	0.46405	1	1
1	PREPL	2.7134e-28	0.5204	0.50982	1	1
1	EPB41L4B	1.6339e-12	0.5204	0.58861	1	1
1	DPY19L2	0.019475	0.5203	0.42281	1	1
1	LNX1	6.4124e-15	0.5201	0.53719	1	1
1	RAPGEF6	2.2457e-11	0.5197	0.63106	1	1
1	PRKCE	6.0112e-15	0.5193	0.55556	1	1
1	FAM161B	1.8332e-18	0.5179	0.71886	1	1
1	NNT	1.0948e-19	0.5169	0.55415	1	1
1	DENND1B	7.4946e-07	0.5164	0.52809	1	1
1	SNTN	4.7782e-08	0.5162	0.54518	1	1
1	CMYA5	0.00071018	0.5161	0.38036	1	1
1	PNPLA4	4.9647e-14	0.5161	0.47323	1	1
1	LASS6	1.5948e-10	0.5159	0.48615	1	1
1	ZFP30	1.4392e-21	0.5159	0.50048	1	1
1	PAIP2B	2.9862e-08	0.5158	0.35703	1	1
1	SPR	1.2919e-13	0.5154	0.44468	1	1
1	NEK4	5.5907e-34	0.5154	0.58324	1	1
1	C6orf211	9.4219e-26	0.5151	0.97931	1	1
1	ADAMTS13	1.6612e-08	0.5148	0.5215	1	1
1	LOC115110	5.2422e-05	0.5138	0.40944	1	1
1	CAB39L	4.7218e-10	0.5133	0.45157	1	1
1	LOC646851	1.2951e-07	0.5124	0.4334	1	1
1	TTC39A	4.6319e-07	0.5121	0.46019	1	1
1	NUCB2	4.7778e-08	0.512	0.47795	1	1
1	UCKL1AS	1.6919e-07	0.5108	0.41717	1	1
1	LOC100272217	1.7645e-10	0.5107	0.42648	1	1
1	C9orf106	0.00058934	0.5105	0.3544	1	1
1	GCNT4	0.003136	0.5103	0.50128	1	1
1	PRRT2	1.0504e-05	0.5103	0.43387	1	1
1	DEPDC6	1.5545e-07	0.5087	0.46846	1	1
1	HIST1H2BD	1.8725e-05	0.5087	0.44335	1	1
1	SPDEF	0.00046828	0.5086	0.62766	1	1
1	SBNO1	3.7592e-11	0.5084	0.60975	1	1
1	IFT140	4.6246e-15	0.5079	0.55132	1	1
1	C14orf167	6.8438e-22	0.5079	0.56502	1	1
1	ARNT2	0.002858	0.507	0.2714	1	1
1	SORL1	3.073e-06	0.5067	0.4628	1	1
1	ZNF704	6.8387e-08	0.5064	0.54406	1	1
1	LOC285593	8.034e-07	0.5064	0.56727	1	1
1	SCAMP5	7.0088e-06	0.5061	0.38608	1	1
1	ZNF253	6.8581e-19	0.5055	0.53718	1	1
1	GDF9	2.5995e-10	0.5047	0.37148	1	1
1	ACSS1	2.5566e-05	0.5045	0.20261	1	1
1	LOC221442	2.8692e-05	0.5045	0.44525	1	1
1	ZNF491	3.5833e-13	0.5045	0.48256	1	1
1	NBR2	1.177e-15	0.5044	0.54674	1	1
1	THNSL1	1.1135e-15	0.5043	0.44336	1	1
1	ZC3HAV1L	2.6631e-06	0.5041	0.37757	1	1
1	FAM164C	1.8621e-16	0.5038	0.50412	1	1
1	C6orf27	0.00093613	0.5034	0.4224	1	1
1	C12orf51	1.089e-20	0.5029	0.50533	1	1
1	BBS4	1.3059e-22	0.5027	0.50493	1	1
1	ZNF546	1.3734e-20	0.5026	0.50704	1	1
1	MKL2	2.5077e-19	0.5026	0.58844	1	1
1	TCEA3	7.8045e-10	0.5025	0.50147	1	1
1	BCKDHB	4.413e-17	0.5019	0.48431	1	1
1	MANEAL	1.4517e-09	0.5018	0.53861	1	1
1	SLC25A4	1.5437e-14	0.5015	0.37781	1	1
1	GPRC5C	7.9255e-08	0.501	0.51181	1	1
1	AMACR	1.4579e-17	0.5007	0.72932	1	1
1	DIS3L	4.9637e-33	0.5007	0.50065	1	1
1	ZNF619	5.3961e-16	0.5005	0.53435	1	1
1	PHOSPHO2	4.5389e-15	0.5004	0.47382	1	1
1	IL20RA	0.066682	0.4999	0.039258	1	1
1	ZNF626	1.927e-07	0.4997	0.4142	1	1
1	GLB1L2	0.010469	0.4995	0.097039	1	1
1	C20orf12	2.9196e-14	0.4995	0.45194	1	1
1	ZNF24	1.2305e-27	0.4994	0.50247	1	1
1	LOC284440	3.0355e-17	0.4991	0.539	1	1
1	SELENBP1	2.2707e-09	0.4987	0.62053	1	1
1	PTK6	0.00036802	0.4987	0.35538	1	1
1	WFS1	2.6845e-13	0.4986	0.4444	1	1
1	C1orf101	1.6509e-08	0.4976	0.52517	1	1
1	PGPEP1	6.3363e-15	0.4973	0.48786	1	1
1	CCDC108	1.5481e-05	0.4973	0.82082	1	1
1	PPIP5K1	1.5661e-17	0.4971	0.48904	1	1
1	TMEM161B	5.266e-31	0.4964	0.53362	1	1
1	KIAA1407	7.0864e-17	0.4961	0.53494	1	1
1	PHF7	1.1376e-12	0.4959	0.47192	1	1
1	ZCWPW2	2.9977e-15	0.4956	0.52437	1	1
1	SPTBN5	0.010357	0.4951	0.26852	1	1
1	ADAL	2.1287e-16	0.495	0.39229	1	1
1	EPB41L5	3.5907e-20	0.4949	0.57858	1	1
1	NBPF3	3.7215e-14	0.4948	0.59858	1	1
1	ABHD2	8.9258e-09	0.4945	0.55122	1	1
1	CLOCK	1.4266e-08	0.4944	0.48411	1	1
1	GSTO2	4.7375e-08	0.4942	0.4537	1	1
1	FN3K	7.9222e-14	0.494	0.51442	1	1
1	HIST2H2BF	7.7848e-05	0.4939	0.37274	1	1
1	TTLL9	0.0029537	0.4939	0.28199	1	1
1	ARSD	4.7013e-12	0.4938	0.39051	1	1
1	NEU3	4.7768e-09	0.4933	0.54819	1	1
1	ZDHHC21	4.5519e-13	0.493	0.48699	1	1
1	CITED2	1.2123e-07	0.4922	0.37063	1	1
1	ANKRD26	5.4177e-16	0.4922	0.52898	1	1
1	SEMA4G	2.3046e-07	0.4921	0.50456	1	1
1	TMEM25	7.634e-14	0.4918	0.60654	1	1
1	ZNF471	0.019459	0.4918	0.12309	1	1
1	KLHL32	1.1538e-07	0.4917	0.53294	1	1
1	LIMD1	1.3234e-20	0.4916	0.45955	1	1
1	ZSCAN18	0.00010072	0.4904	0.074532	1	1
1	SARM1	1.3867e-06	0.4898	0.40362	1	1
1	C1orf203	1.1907e-16	0.489	0.51433	1	1
1	PAN2	1.8069e-20	0.4887	0.54063	1	1
1	ZNF486	0.00040013	0.4881	0.48133	1	1
1	ZNF541	0.053637	0.488	0.20259	1	1
1	LRGUK	2.1605e-06	0.4873	0.56379	1	1
1	TSPAN1	0.044169	0.4867	0.28222	1	1
1	C9orf117	8.8396e-09	0.4866	0.53423	1	1
1	CPEB4	4.2619e-18	0.4863	0.62163	1	1
1	SERPINI1	7.76e-07	0.4857	0.703	1	1
1	ZNF92	3.0939e-13	0.485	0.54959	1	1
1	C9orf163	1.227e-11	0.4846	0.50684	1	1
1	ZFYVE9	8.1765e-17	0.4846	0.37582	1	1
1	PANK3	1.6602e-12	0.484	0.49401	1	1
1	TMED4	1.1237e-31	0.4839	0.47393	1	1
1	MTMR4	2.031e-24	0.4826	0.53963	1	1
1	C1orf210	5.3623e-16	0.4824	0.48859	1	1
1	C2orf73	2.555e-06	0.4823	0.49527	1	1
1	KIAA0564	8.5063e-15	0.4822	0.49345	1	1
1	SEPSECS	3.2674e-25	0.4821	0.51412	1	1
1	ZMYND10	7.6036e-06	0.482	0.64265	1	1
1	DMXL1	7.2421e-23	0.4816	0.52797	1	1
1	LOC222699	1.7309e-06	0.4815	0.44514	1	1
1	PDPK1	3.2341e-22	0.4812	0.50146	1	1
1	MGC3771	1.8581e-15	0.481	0.50433	1	1
1	KIF27	1.3708e-11	0.4809	0.48405	1	1
1	ZNF497	4.8416e-13	0.4808	0.42397	1	1
1	LOC728613	3.1104e-15	0.4808	0.50949	1	1
1	CEP290	5.6962e-21	0.48	0.52078	1	1
1	LOC92973	3.0451e-07	0.48	0.4704	1	1
1	IL17RB	3.4912e-10	0.4792	0.65795	1	1
1	TMEM181	4.6471e-17	0.4786	0.55915	1	1
1	ZNF620	3.725e-19	0.4786	0.55057	1	1
1	HDHD2	2.4588e-33	0.4784	0.47089	1	1
1	RBM47	2.0446e-17	0.4784	0.50327	1	1
1	CCDC126	3.7972e-14	0.4779	0.46436	1	1
1	PP14571	0.007012	0.4775	0.49185	1	1
1	SAMD12	8.2023e-06	0.4774	0.37451	1	1
1	ZNF516	8.7683e-08	0.4768	0.29455	1	1
1	CEP97	1.2055e-09	0.4764	0.4404	1	1
1	ZNF568	2.8132e-13	0.476	0.35339	1	1
1	NICN1	1.3108e-20	0.476	0.43541	1	1
1	SYTL4	1.3406e-06	0.4757	0.4789	1	1
1	CDH1	1.0526e-10	0.4756	0.57558	1	1
1	CGNL1	0.026374	0.4755	0.13166	1	1
1	IGFALS	0.0019729	0.4753	0.45773	1	1
1	MPP7	5.6907e-05	0.4753	0.35813	1	1
1	DNAL1	8.5214e-21	0.4741	0.50194	1	1
1	C7orf46	9.5646e-09	0.4741	0.43935	1	1
1	FAM95B1	0.00057974	0.474	0.39537	1	1
1	C17orf108	3.2643e-12	0.4728	0.44402	1	1
1	CXADR	3.2734e-05	0.4728	0.36989	1	1
1	GUSBL1	1.4626e-13	0.4726	0.54908	1	1
1	RALGAPA1	9.8696e-26	0.4725	0.49875	1	1
1	LOC100101266	7.9454e-07	0.4725	0.40731	1	1
1	ACACA	8.9277e-17	0.472	0.4806	1	1
1	SLC25A35	2.2955e-10	0.4717	0.49163	1	1
1	ATP6AP1L	3.3134e-11	0.4717	0.46012	1	1
1	PRDM12	1.4801e-05	0.4716	0.3473	1	1
1	C4orf34	2.6398e-11	0.4715	0.45482	1	1
1	C15orf28	5.5746e-06	0.4712	0.4026	1	1
1	C17orf69	1.2827e-11	0.4711	0.39242	1	1
1	TSPYL3	3.4458e-07	0.4706	0.46151	1	1
1	SEMA3F	7.192e-12	0.4706	0.53134	1	1
1	GOT2	4.2078e-19	0.4706	0.47408	1	1
1	MST1P2	0.00029017	0.4704	0.38017	1	1
1	REEP6	6.4051e-05	0.4703	0.45634	1	1
1	NHEDC1	5.9302e-11	0.4698	0.52924	1	1
1	SPATA13	4.4883e-07	0.4694	0.5516	1	1
1	ZFP62	8.3063e-21	0.469	0.41903	1	1
1	MYO5B	1.2989e-10	0.4689	0.48144	1	1
1	ZDHHC23	3.8137e-09	0.4689	0.40097	1	1
1	SLC7A8	0.0063053	0.4688	0.18368	1	1
1	C20orf96	3.5671e-12	0.4688	0.42776	1	1
1	GOLGA2B	8.0417e-07	0.4685	0.42118	1	1
1	FLNB	7.9781e-20	0.4684	0.55831	1	1
1	ZNF420	1.7165e-18	0.4682	0.5219	1	1
1	SPATA20	1.4899e-12	0.4679	0.47875	1	1
1	NIPA1	4.2447e-17	0.4677	0.40476	1	1
1	AFF4	9.9595e-15	0.4675	0.37817	1	1
1	CCDC24	4.2043e-10	0.4674	0.43429	1	1
1	GLOD5	0.0037053	0.4671	0.21312	1	1
1	PCMTD2	9.9139e-24	0.4662	0.52641	1	1
1	DYNLL2	7.9544e-23	0.4659	0.46843	1	1
1	MT1DP	0.0031133	0.4658	0.36845	1	1
1	MAP7	1.2169e-20	0.4657	0.60952	1	1
1	H2AFJ	3.555e-06	0.4653	0.37608	1	1
1	AS3MT	0.0017059	0.4642	0.22337	1	1
1	CD46	3.7546e-21	0.4639	0.51698	1	1
1	TAS2R5	4.6058e-07	0.4639	0.45796	1	1
1	WDR5B	8.9236e-29	0.4636	0.44206	1	1
1	NLK	5.3596e-22	0.4633	0.4815	1	1
1	LOC100190986	1.4079e-08	0.463	0.54754	1	1
1	KIF16B	7.7373e-15	0.4626	0.52554	1	1
1	FLRT1	9.4614e-05	0.4622	0.52721	1	1
1	TBCK	4.8736e-19	0.4622	0.4336	1	1
1	TAPT1	1.3278e-26	0.462	0.52419	1	1
1	C9orf129	4.6949e-11	0.4615	0.51384	1	1
1	DNAH6	0.0011575	0.4615	0.30094	1	1
1	PGAP1	1.1649e-05	0.4602	0.28108	1	1
1	TXNDC16	1.832e-13	0.4599	0.56541	1	1
1	NCRNA00173	0.0027272	0.4596	0.58757	1	1
1	NR6A1	0.00013075	0.4596	0.35558	1	1
1	CNTD1	5.2343e-12	0.4588	0.56673	1	1
1	LOC613037	0.04644	0.4587	0.30537	1	1
1	ZBTB42	4.3032e-10	0.4585	0.41815	1	1
1	C17orf50	1.3899e-07	0.4584	0.46698	1	1
1	KBTBD7	9.7301e-13	0.458	0.59996	1	1
1	MYST4	1.5513e-16	0.458	0.63467	1	1
1	LIMCH1	0.0013267	0.4578	0.13233	1	1
1	C18orf32	3.3979e-19	0.4578	0.40553	1	1
1	HMGCR	1.6084e-15	0.4572	0.44681	1	1
1	FBXL5	3.4165e-21	0.4567	0.45162	1	1
1	MST1	6.883e-06	0.4564	0.55833	1	1
1	PTPN13	0.0060384	0.4561	0.060836	1	1
1	LOC253724	1.0491e-11	0.4557	0.41254	1	1
1	DUSP16	1.2778e-09	0.4554	0.37185	1	1
1	CHD6	2.5701e-19	0.4553	0.53287	1	1
1	CPLX1	3.7616e-05	0.4551	0.54007	1	1
1	MIPOL1	7.9878e-09	0.455	0.48695	1	1
1	C17orf58	1.3004e-15	0.455	0.53461	1	1
1	C9orf102	2.7936e-05	0.4549	0.35351	1	1
1	NBR1	1.0604e-35	0.454	0.52398	1	1
1	EPB41	7.499e-17	0.4533	0.51927	1	1
1	PCDHA9	0.02285	0.4533	0.31966	1	1
1	IMPG1	4.2825e-06	0.4531	0.4175	1	1
1	C2orf55	2.4179e-05	0.4531	0.28498	1	1
1	ZNF239	5.3789e-09	0.4528	0.38947	1	1
1	NEK10	0.0062875	0.4518	0.48011	1	1
1	PAFAH2	8.6627e-22	0.4515	0.43898	1	1
1	ABCA2	4.7989e-07	0.4509	0.33516	1	1
1	NBEAL1	2.5792e-05	0.4505	0.41577	1	1
1	C3orf33	9.357e-10	0.4503	0.32085	1	1
1	ZNF415	4.9649e-08	0.4503	0.18615	1	1
1	LOC400027	2.9966e-17	0.4497	0.43767	1	1
1	RAVER2	3.4938e-06	0.4495	0.19508	1	1
1	CCDC158	6.0905e-05	0.4493	0.63953	1	1
1	CYP4F11	0.017234	0.4492	0.35045	1	1
1	MYO15A	1.3598e-05	0.4489	0.39391	1	1
1	FAM84B	1.1403e-09	0.4488	0.46691	1	1
1	PIGV	1.226e-21	0.4488	0.46355	1	1
1	LOC143666	2.0015e-07	0.4487	0.44824	1	1
1	ZSWIM6	3.3959e-09	0.4482	0.383	1	1
1	LRRC37A	7.4598e-12	0.4482	0.36993	1	1
1	PDP2	6.7031e-12	0.4481	0.44247	1	1
1	ZNF780B	7.5934e-13	0.448	0.36414	1	1
1	C8orf37	8.4919e-12	0.448	0.47539	1	1
1	FASN	1.8654e-08	0.448	0.43996	1	1
1	HIST1H3H	0.00082192	0.448	0.38396	1	1
1	GJB1	0.0036595	0.448	0.81587	1	1
1	TCP11L2	1.3724e-10	0.4475	0.49299	1	1
1	GDAP1	2.0166e-08	0.4475	0.68352	1	1
1	MYSM1	1.3641e-08	0.4474	0.44481	1	1
1	CATSPER2P1	1.2321e-15	0.4467	0.39983	1	1
1	APOF	1.9958e-05	0.4467	0.46694	1	1
1	PER3	2.0549e-05	0.4461	0.33757	1	1
1	THNSL2	1.4277e-06	0.4459	0.25902	1	1
1	FBXL16	0.018558	0.4456	0.21195	1	1
1	TRIM52	4.5397e-17	0.4455	0.41606	1	1
1	LRRC48	2.0326e-05	0.445	0.47692	1	1
1	FNIP1	4.2369e-21	0.4447	0.43915	1	1
1	SIX4	0.00012759	0.4442	0.29414	1	1
1	NAGS	3.9293e-05	0.4439	0.49396	1	1
1	ZNF772	9.2934e-07	0.4436	0.20248	1	1
1	LOC402377	2.0799e-09	0.4433	0.50482	1	1
1	PLD6	3.8382e-07	0.4431	0.3084	1	1
1	CCDC151	3.5675e-05	0.4426	0.61163	1	1
1	ERI2	3.6149e-27	0.4426	0.51303	1	1
1	ELOVL6	9.7235e-08	0.4424	0.43063	1	1
1	CRIPAK	2.69e-14	0.4421	0.44049	1	1
1	PCMTD1	1.1847e-17	0.4421	0.4642	1	1
1	ZNF594	2.0809e-10	0.4417	0.4016	1	1
1	DRD1	0.00068012	0.4414	0.85559	1	1
1	EFHC1	5.9838e-15	0.4413	0.45336	1	1
1	ZNF585B	4.405e-14	0.4406	0.43958	1	1
1	ZNF827	7.011e-08	0.4405	0.44974	1	1
1	OVOL1	1.4167e-06	0.4404	0.44082	1	1
1	MTL5	3.8368e-08	0.4399	0.45165	1	1
1	RAD50	2.3535e-20	0.4398	0.45867	1	1
1	NSF	1.3661e-21	0.4398	0.45491	1	1
1	ARID2	3.6088e-16	0.4397	0.36214	1	1
1	VPS37D	7.9632e-06	0.439	0.35052	1	1
1	DNAJC27	5.1334e-21	0.4379	0.42805	1	1
1	AGAP5	5.8558e-09	0.4377	0.39737	1	1
1	C14orf33	2.3832e-08	0.4375	0.3306	1	1
1	CCDC13	2.3418e-06	0.4373	0.38662	1	1
1	USP46	1.4877e-18	0.4371	0.44889	1	1
1	IFT88	1.1014e-14	0.4366	0.39862	1	1
1	TMEM99	2.4086e-09	0.4364	0.36679	1	1
1	MAP3K9	9.527e-07	0.4359	0.38074	1	1
1	ZNF665	4.018e-08	0.4358	0.36196	1	1
1	ZNF718	1.0614e-09	0.4357	0.36465	1	1
1	ZNF814	3.538e-12	0.4355	0.43802	1	1
1	ZNF721	1.4957e-22	0.4351	0.44131	1	1
1	KIAA1737	4.3536e-19	0.4349	0.43731	1	1
1	PDIK1L	6.6281e-23	0.4348	0.45748	1	1
1	GOLGA6B	2.7583e-08	0.4348	0.50455	1	1
1	AKAP10	4.2112e-17	0.4347	0.48678	1	1
1	SCAMP1	3.7555e-17	0.4343	0.39835	1	1
1	LOC441294	2.1017e-05	0.434	0.27553	1	1
1	ZNF442	2.8328e-10	0.434	0.45737	1	1
1	SVIP	2.3275e-16	0.4333	0.44292	1	1
1	SIDT1	0.0033759	0.4329	0.33762	1	1
1	MANSC1	6.2741e-12	0.4327	0.3978	1	1
1	ZNF595	1.6681e-11	0.4326	0.37818	1	1
1	WDR19	4.4364e-17	0.4318	0.43088	1	1
1	ERMP1	1.3322e-09	0.4317	0.38015	1	1
1	ZXDB	6.829e-18	0.4317	0.39024	1	1
1	ZNF703	7.249e-06	0.4314	0.6429	1	1
1	HLTF	1.0276e-18	0.4313	0.49522	1	1
1	DTWD2	3.8026e-15	0.4312	0.46886	1	1
1	TPI1P2	4.5013e-12	0.4308	0.40303	1	1
1	INTU	1.5999e-08	0.4299	0.34897	1	1
1	C9orf173	2.8539e-06	0.4297	0.48783	1	1
1	MCM3APAS	1.7223e-09	0.4295	0.4493	1	1
1	ZNF664	1.3088e-23	0.4292	0.45019	1	1
1	TOM1L2	3.5952e-12	0.4284	0.41299	1	1
1	KCNIP4	1.4115e-08	0.4282	0.39291	1	1
1	ARL17A	1.4284e-13	0.4277	0.44136	1	1
1	C2orf63	4.4668e-11	0.4275	0.43298	1	1
1	ZNF770	1.04e-13	0.4269	0.34165	1	1
1	TNK1	7.1324e-10	0.4263	0.35395	1	1
1	ZNF382	5.7727e-05	0.4263	0.24613	1	1
1	ACVR2B	1.0081e-13	0.4261	0.49709	1	1
1	OTUD7A	0.014294	0.4261	0.28778	1	1
1	ZNF181	9.48e-22	0.426	0.4375	1	1
1	ZNF285	1.2789e-05	0.4257	0.19562	1	1
1	PPM1L	1.6089e-06	0.4254	0.55793	1	1
1	TJP3	8.3399e-06	0.4251	0.44674	1	1
1	EML2	2.4708e-10	0.4251	0.4104	1	1
1	GLUD2	1.1125e-13	0.4248	0.52213	1	1
1	UBN2	3.6836e-16	0.4247	0.3789	1	1
1	ZNF132	3.1451e-08	0.4245	0.40349	1	1
1	C10orf68	5.5119e-06	0.4244	0.3893	1	1
1	CYP4V2	8.7983e-11	0.4241	0.40391	1	1
1	NF1	2.1238e-15	0.4241	0.40113	1	1
1	CCND1	5.3701e-06	0.4239	0.33469	1	1
1	C6orf165	0.00023662	0.4238	0.35361	1	1
1	USH2A	3.3243e-07	0.4231	0.41897	1	1
1	ZNF33B	3.0492e-15	0.4228	0.39443	1	1
1	METTL7A	4.2324e-06	0.4226	0.42262	1	1
1	SNORA39	6.7067e-07	0.4224	0.39895	1	1
1	CYP2J2	0.01868	0.4218	0.23858	1	1
1	ASAH2	1.557e-06	0.4213	0.45825	1	1
1	BCOR	1.2154e-11	0.4212	0.22502	1	1
1	PANK1	4.7455e-05	0.4211	0.24069	1	1
1	AKD1	2.7411e-12	0.4211	0.44919	1	1
1	FLJ35390	2.6426e-06	0.4207	0.43557	1	1
1	WDFY3	2.5114e-17	0.4206	0.43052	1	1
1	FICD	5.8208e-11	0.4205	0.48446	1	1
1	AP1AR	9.0961e-26	0.4201	0.50121	1	1
1	ZNF165	1.0173e-09	0.4194	0.37799	1	1
1	MYADML2	0.00031344	0.4193	0.29592	1	1
1	LRIT3	2.0651e-05	0.4192	0.37406	1	1
1	C1orf229	2.0922e-06	0.4192	0.40809	1	1
1	C12orf34	2.3695e-06	0.4192	0.40479	1	1
1	TCTA	6.721e-15	0.4189	0.38887	1	1
1	VPS13A	6.1698e-10	0.4186	0.3691	1	1
1	SPIN3	2.811e-15	0.4176	0.43431	1	1
1	MAGIX	3.1522e-06	0.4175	0.42366	1	1
1	BCDIN3D	5.111e-27	0.4174	0.41905	1	1
1	CABLES1	5.4225e-05	0.4173	0.27379	1	1
1	STON2	9.7426e-05	0.4173	0.3195	1	1
1	FA2H	0.0010354	0.417	0.41034	1	1
1	C9orf5	9.4965e-14	0.4166	0.36118	1	1
1	SHPRH	1.1022e-09	0.4163	0.54389	1	1
1	FAM179B	5.4029e-19	0.4162	0.46603	1	1
1	C12orf66	1.9219e-19	0.4156	0.48846	1	1
1	NR1D2	9.7051e-13	0.4155	0.3869	1	1
1	ANKHD1-EIF4EBP3	2.9282e-11	0.4155	0.40486	1	1
1	DZIP3	1.0866e-14	0.4151	0.43076	1	1
1	CECR4	4.0412e-07	0.4151	0.41533	1	1
1	LZTFL1	2.131e-18	0.415	0.45679	1	1
1	USP30	2.9729e-33	0.4149	0.4647	1	1
1	ZNF254	2.3176e-14	0.4149	0.47729	1	1
1	VSIG10	5.0234e-13	0.4148	0.46139	1	1
1	HEXIM1	9.3882e-13	0.4147	0.39197	1	1
1	C5orf33	4.069e-13	0.4147	0.36232	1	1
1	PGBD4	2.7891e-15	0.4146	0.4308	1	1
1	MGAT4A	4.359e-07	0.4144	0.48539	1	1
1	TMEM125	6.1862e-06	0.4141	0.37506	1	1
1	MORN4	3.1423e-12	0.4141	0.39109	1	1
1	AHCYL2	2.1605e-15	0.4139	0.47962	1	1
1	ZNF542	6.4344e-06	0.4139	0.20631	1	1
1	BHLHB9	3.9208e-10	0.4136	0.36517	1	1
1	HEATR4	0.0015137	0.4133	0.33539	1	1
1	DENND4C	1.8245e-15	0.413	0.44304	1	1
1	GPR89B	1.7448e-05	0.413	0.44421	1	1
1	BMS1P4	1.9238e-10	0.4128	0.48629	1	1
1	GHDC	1.3766e-09	0.4127	0.34411	1	1
1	TSSK3	1.0023e-05	0.4127	0.36032	1	1
1	RALGAPA2	2.8476e-06	0.4126	0.63292	1	1
1	TUBG2	2.1549e-06	0.4126	0.27128	1	1
1	C4orf32	1.141e-07	0.4124	0.43349	1	1
1	ZNF658	1.0366e-11	0.4123	0.42228	1	1
1	MCF2L	1.1818e-06	0.4119	0.37221	1	1
1	MTMR10	4.2044e-20	0.4119	0.39656	1	1
1	PLEKHA7	1.4199e-10	0.4115	0.49994	1	1
1	BRWD3	2.0877e-06	0.4115	0.38075	1	1
1	CPNE3	3.8646e-16	0.4114	0.41886	1	1
1	LRRIQ1	0.070237	0.4114	0.19681	1	1
1	PRRT3	6.7183e-08	0.4112	0.49383	1	1
1	KIAA0528	4.1128e-19	0.4111	0.37722	1	1
1	OSBP2	2.9285e-08	0.4108	0.49851	1	1
1	ERBB3	2.5757e-05	0.4106	0.28446	1	1
1	LOC441208	2.4836e-09	0.4105	0.40699	1	1
1	SYNJ2BP	1.144e-20	0.4105	0.42171	1	1
1	MYLIP	1.7509e-09	0.4099	0.41668	1	1
1	ACBD5	2.9025e-19	0.4097	0.4855	1	1
1	ARTN	0.00083159	0.4093	0.33039	1	1
1	LENEP	3.2477e-05	0.4093	0.25828	1	1
1	C19orf36	0.00016767	0.4086	0.37359	1	1
1	C9orf45	6.028e-07	0.4081	0.39045	1	1
1	ANKRD12	3.3933e-13	0.408	0.35572	1	1
1	HK2	6.4099e-05	0.4077	0.27883	1	1
1	ANUBL1	2.881e-11	0.4076	0.44065	1	1
1	C1orf58	3.0674e-07	0.4067	0.42537	1	1
1	FPGT	5.8781e-22	0.4063	0.43008	1	1
1	CCDC48	6.4798e-05	0.4059	0.52713	1	1
1	ALS2CR8	1.0565e-16	0.4058	0.5033	1	1
1	MARCH8	3.6731e-09	0.4058	0.56986	1	1
1	LOC283174	0.0040998	0.4053	0.3775	1	1
1	DHX33	3.8775e-08	0.4053	0.414	1	1
1	ALG10B	6.2868e-17	0.4047	0.46213	1	1
1	CCDC121	8.4896e-22	0.4046	0.4848	1	1
1	GGT7	1.4533e-10	0.4045	0.48086	1	1
1	TMEM84	7.7932e-06	0.4044	0.71168	1	1
1	SLC25A38	1.7799e-25	0.4044	0.43491	1	1
1	DCTN4	8.7901e-22	0.4044	0.4	1	1
1	SQLE	0.0024935	0.4043	0.21683	1	1
1	ANKRA2	2.015e-23	0.4042	0.46016	1	1
1	ACOT11	0.014377	0.404	0.21452	1	1
1	HS3ST5	1.2387e-05	0.4039	0.80321	1	1
1	ZNF776	1.0558e-21	0.4039	0.46398	1	1
1	SLC24A1	9.507e-13	0.4036	0.38391	1	1
1	TMED7	1.3982e-14	0.4035	0.34157	1	1
1	GIPR	0.07311	0.4034	0.28197	1	1
1	YIPF6	1.4816e-16	0.4033	0.44604	1	1
1	TTC25	1.8873e-06	0.4032	0.41072	1	1
1	PATZ1	1.1172e-18	0.4029	0.46884	1	1
1	DNAJC16	1.4504e-29	0.4027	0.47307	1	1
1	MAPRE3	8.6913e-08	0.4025	0.3137	1	1
1	ZKSCAN3	2.0913e-16	0.4024	0.42864	1	1
1	ARFGEF2	4.3387e-17	0.4018	0.45303	1	1
1	DNAJB14	7.3931e-12	0.4017	0.37032	1	1
1	FBXO41	0.00018115	0.4017	0.15078	1	1
1	SERP2	0.047842	0.4017	0.11913	1	1
1	PTPLAD1	3.5736e-18	0.4015	0.47611	1	1
1	LOC100128842	9.1963e-05	0.4015	0.33342	1	1
1	SH3RF1	2.5902e-15	0.4014	0.49669	1	1
1	KRTCAP3	0.0018538	0.4012	0.20336	1	1
1	SUOX	1.247e-19	0.401	0.44233	1	1
1	PEX7	2.7583e-16	0.4009	0.4173	1	1
1	NFXL1	5.0647e-21	0.4008	0.39594	1	1
1	ZBTB10	2.3062e-09	0.4005	0.58633	1	1
1	FLJ37453	7.9186e-10	0.4004	0.3457	1	1
1	ZNF791	4.9518e-13	0.4003	0.42092	1	1
1	SACM1L	2.7329e-31	0.4003	0.4386	1	1
1	C11orf42	1.0251e-08	0.3999	0.325	1	1
1	MAGEE1	6.187e-05	0.3997	0.21853	1	1
1	CYB5RL	1.9427e-11	0.3993	0.41935	1	1
1	ATP7A	1.8304e-11	0.3992	0.39162	1	1
1	N6AMT1	3.1822e-16	0.3986	0.41892	1	1
1	ZNF141	1.657e-12	0.3982	0.40634	1	1
1	LRTOMT	2.9895e-18	0.3972	0.47359	1	1
1	ZFP112	1.5523e-14	0.397	0.35767	1	1
1	TTC19	8.0866e-14	0.397	0.32714	1	1
1	ZFP3	3.9e-08	0.3969	0.29792	1	1
1	HSD17B8	8.4082e-10	0.3966	0.42676	1	1
1	COQ7	8.9219e-27	0.3965	0.42327	1	1
1	KLHDC10	9.0542e-14	0.396	0.54268	1	1
1	PBLD	4.6847e-09	0.3955	0.39493	1	1
1	TMEM135	4.7286e-09	0.3951	0.35157	1	1
1	ZNF236	1.3165e-16	0.395	0.42543	1	1
1	C10orf32	1.1924e-15	0.3948	0.41421	1	1
1	KIAA0195	1.9491e-18	0.3948	0.47285	1	1
1	NAALADL2	0.0024072	0.3943	0.34901	1	1
1	PCBD2	1.1838e-19	0.394	0.37201	1	1
1	ZNF287	7.0044e-08	0.394	0.24104	1	1
1	SECISBP2L	1.2578e-12	0.3937	0.40436	1	1
1	MTERFD3	2.4243e-13	0.3937	0.38567	1	1
1	NUBPL	4.8251e-19	0.3931	0.42654	1	1
1	HSD17B14	0.042965	0.3931	0.17522	1	1
1	GKAP1	2.2349e-15	0.3929	0.44233	1	1
1	TBX6	2.1784e-05	0.3923	0.40283	1	1
1	PEX1	7.4983e-21	0.3917	0.44917	1	1
1	TSSK4	5.1942e-06	0.3916	0.3373	1	1
1	FAM122B	1.0042e-18	0.3916	0.4229	1	1
1	GOLPH3L	1.2954e-14	0.3915	0.39633	1	1
1	CYB561	2.1972e-07	0.3913	0.25653	1	1
1	RPRD1A	5.5079e-18	0.3911	0.3701	1	1
1	C11orf65	1.3378e-07	0.3909	0.34667	1	1
1	C10orf58	1.9425e-08	0.3908	0.37466	1	1
1	ADCY6	9.5285e-14	0.3908	0.42563	1	1
1	CSAD	3.239e-07	0.3904	0.45265	1	1
1	IGF1R	2.2859e-05	0.3902	0.33455	1	1
1	OCRL	1.0127e-14	0.3901	0.34826	1	1
1	ULK2	7.3925e-10	0.3897	0.40293	1	1
1	CPEB2	2.6629e-10	0.3896	0.51234	1	1
1	MLEC	2.928e-12	0.3895	0.34898	1	1
1	ZNF606	1.3134e-10	0.3894	0.35665	1	1
1	RPS10P7	5.0216e-12	0.3894	0.39017	1	1
1	IQSEC2	1.1972e-09	0.3893	0.35229	1	1
1	EPM2AIP1	9.4177e-19	0.3892	0.42715	1	1
1	CDS1	2.9161e-09	0.3892	0.24214	1	1
1	VN1R1	0.00049654	0.3892	0.25812	1	1
1	BTC	9.5391e-06	0.3891	0.50503	1	1
1	ZNF708	1.7244e-12	0.389	0.40541	1	1
1	DAK	4.9329e-11	0.3888	0.33235	1	1
1	CHMP4C	5.2044e-09	0.3888	0.40934	1	1
1	ZNF81	3.9086e-10	0.3888	0.41181	1	1
1	LEAP2	0.00013217	0.3886	0.53726	1	1
1	IRX5	0.063102	0.3886	0.080805	1	1
1	PTPRQ	0.00051085	0.3885	1.0902	1	1
1	CDNF	1.0519e-08	0.3885	0.47379	1	1
1	ASXL2	1.0873e-05	0.3883	0.44202	1	1
1	C2orf16	1.2093e-06	0.3878	0.25867	1	1
1	ERLIN2	2.7309e-14	0.3877	0.53868	1	1
1	MAMDC4	0.0034759	0.3877	0.29057	1	1
1	TUBA3E	7.7764e-05	0.3876	0.6873	1	1
1	MAGED2	4.2429e-08	0.3875	0.4417	1	1
1	SCNN1A	0.051695	0.3873	0.080317	1	1
1	EEF1DP3	5.0039e-05	0.3866	0.40331	1	1
1	ANKRD31	2.1076e-10	0.3866	0.4991	1	1
1	THAP10	7.255e-14	0.3866	0.45376	1	1
1	ZKSCAN2	1.3231e-17	0.3865	0.41242	1	1
1	ZNF20	5.2506e-16	0.3865	0.31722	1	1
1	CMTM4	2.3306e-06	0.3862	0.3635	1	1
1	ZNF689	5.3448e-12	0.3862	0.4942	1	1
1	FKBP4	3.8914e-17	0.3862	0.43707	1	1
1	G6PC3	1.0956e-15	0.3859	0.41109	1	1
1	ZNF100	7.2611e-07	0.3855	0.31741	1	1
1	C3orf14	0.026049	0.3855	-0.027704	1	1
1	ZNF425	1.7346e-10	0.3855	0.39361	1	1
1	GTF2I	1.3278e-14	0.3854	0.51232	1	1
1	LIG3	4.4483e-18	0.3853	0.36445	1	1
1	C4orf37	4.2485e-10	0.3851	0.30756	1	1
1	LCORL	6.1746e-11	0.3851	0.34229	1	1
1	TMEM101	3.2725e-10	0.3848	0.51094	1	1
1	ZNF675	5.6093e-12	0.3846	0.39958	1	1
1	CLASP2	9.9452e-21	0.3845	0.41395	1	1
1	TULP4	3.8718e-15	0.3842	0.368	1	1
1	OCIAD1	6.4949e-23	0.3839	0.35071	1	1
1	ZBTB26	1.5144e-12	0.3838	0.47459	1	1
1	TSSK6	1.9462e-09	0.3834	0.39331	1	1
1	PCYOX1	1.4314e-15	0.3834	0.41138	1	1
1	FLJ46111	2.8182e-05	0.3833	0.46615	1	1
1	AHSA2	2.1713e-08	0.3826	0.42872	1	1
1	OCEL1	7.9741e-10	0.3824	0.36216	1	1
1	KLHL3	0.0004461	0.3823	0.26269	1	1
1	ZNF630	6.6155e-11	0.3821	0.27931	1	1
1	GOLT1A	0.001123	0.382	0.26549	1	1
1	THAP9	2.9897e-17	0.3817	0.35867	1	1
1	CYB5R1	3.6797e-12	0.3815	0.39381	1	1
1	ZNF652	6.6961e-17	0.3814	0.37953	1	1
1	CN5H6.4	4.2676e-06	0.3812	0.3723	1	1
1	CELSR3	0.00025175	0.3812	0.48893	1	1
1	C5orf41	1.7211e-10	0.3812	0.47394	1	1
1	CTAGE4	0.0054937	0.3809	0.13674	1	1
1	ASAH1	3.6554e-06	0.3807	0.32448	1	1
1	SLC22A18	0.00011729	0.3805	0.31408	1	1
1	ZNRF3	2.4083e-08	0.3805	0.48943	1	1
1	CNST	3.2254e-20	0.3804	0.40535	1	1
1	ZNF219	0.0013322	0.3803	0.14002	1	1
1	SFMBT1	1.3505e-12	0.3802	0.36166	1	1
1	REST	3.5825e-06	0.379	0.49535	1	1
1	GIN1	2.1368e-22	0.3788	0.3738	1	1
1	UNC13B	1.9128e-11	0.3786	0.49318	1	1
1	PDXDC2	0.00012269	0.3785	0.28853	1	1
1	MGC21881	1.2982e-05	0.3785	0.27567	1	1
1	MIER3	6.9221e-18	0.378	0.39433	1	1
1	FBXO9	2.4567e-19	0.378	0.37284	1	1
1	GFM2	1.0138e-17	0.3779	0.33558	1	1
1	SPAG16	0.00042951	0.3778	0.084748	1	1
1	MOBKL1A	5.047e-15	0.3778	0.39075	1	1
1	TAF1L	5.6874e-09	0.3775	0.40624	1	1
1	PDE12	4.4499e-24	0.3775	0.38549	1	1
1	ADPRHL1	0.0070492	0.3775	0.17774	1	1
1	DHRS13	1.8918e-10	0.3774	0.42172	1	1
1	C16orf46	9.7713e-12	0.377	0.43962	1	1
1	BRWD1	1.3633e-17	0.3766	0.38017	1	1
1	SATL1	1.0873e-14	0.3762	0.42214	1	1
1	ZNF774	2.759e-06	0.3759	0.30687	1	1
1	C2orf77	0.00026477	0.3759	0.27994	1	1
1	TRPM7	3.5203e-20	0.3757	0.42169	1	1
1	ZNF30	1.2345e-16	0.3756	0.41503	1	1
1	HEMK1	7.7794e-14	0.3755	0.36845	1	1
1	EAF1	1.3842e-16	0.3755	0.36642	1	1
1	NEK8	2.8174e-14	0.3752	0.43896	1	1
1	FAM53A	1.5269e-05	0.3746	0.28719	1	1
1	RABEP1	4.8596e-12	0.3745	0.46087	1	1
1	CDKL5	0.062601	0.3745	0.23374	1	1
1	ZXDA	3.8741e-12	0.3744	0.34759	1	1
1	EPT1	5.8046e-14	0.3743	0.36197	1	1
1	HEXIM2	3.2884e-10	0.3743	0.4172	1	1
1	STAG2	4.0504e-13	0.3743	0.24189	1	1
1	EARS2	1.2965e-17	0.3741	0.36089	1	1
1	WDR6	7.1917e-14	0.3736	0.34345	1	1
1	MTX3	9.5242e-20	0.3728	0.38863	1	1
1	C15orf34	3.6208e-05	0.3727	0.30659	1	1
1	NCRNA00202	0.00067105	0.3727	0.38971	1	1
1	IMMP2L	3.9182e-06	0.3727	0.26523	1	1
1	STAG3L2	3.3427e-06	0.3727	0.34691	1	1
1	C5orf54	2.0712e-11	0.3726	0.32705	1	1
1	RSBN1L	8.2681e-21	0.3719	0.37786	1	1
1	PRICKLE4	5.8764e-07	0.3715	0.5788	1	1
1	SPG11	2.7324e-19	0.3714	0.40965	1	1
1	C13orf38	0.031203	0.3712	0.23938	1	1
1	SFRS14	6.4758e-20	0.371	0.3809	1	1
1	LASS2	5.3279e-19	0.3708	0.39241	1	1
1	TCEAL6	0.00079314	0.3708	0.28738	1	1
1	OTUB2	2.3629e-05	0.3707	0.25395	1	1
1	KIAA0182	8.3514e-12	0.37	0.35229	1	1
1	CPD	1.8605e-09	0.3697	0.37959	1	1
1	ZNF785	3.302e-13	0.3696	0.36793	1	1
1	SMARCA2	3.3681e-10	0.369	0.32226	1	1
1	SLC9A10	0.0090426	0.3689	0.18318	1	1
1	CDKN2AIPNL	1.6065e-12	0.3689	0.30595	1	1
1	ZNF518A	1.2583e-10	0.3688	0.30562	1	1
1	TRAK1	3.4557e-19	0.3684	0.51814	1	1
1	GEMIN8P4	2.1451e-07	0.3684	0.33006	1	1
1	GALNT7	7.5113e-05	0.3682	0.32763	1	1
1	TSTD2	9.7489e-13	0.3682	0.37689	1	1
1	PHYH	1.9455e-08	0.3682	0.39555	1	1
1	ZNF793	8.483e-09	0.3676	0.33971	1	1
1	OCLM	2.4333e-07	0.3676	0.37177	1	1
1	KIF9	1.4082e-11	0.3675	0.37725	1	1
1	HKR1	8.2718e-15	0.3672	0.33247	1	1
1	MDM2	3.837e-10	0.3672	0.41467	1	1
1	DEPDC4	8.1003e-07	0.3672	0.29313	1	1
1	CCNG1	2.3384e-14	0.3671	0.38703	1	1
1	GSTM4	0.0002331	0.3671	0.28908	1	1
1	PARD6A	3.7664e-07	0.3669	0.38901	1	1
1	GCC2	2.2812e-14	0.3668	0.40516	1	1
1	OXR1	5.3029e-10	0.3666	0.40586	1	1
1	TMEM184A	0.0023343	0.3663	0.17586	1	1
1	CHD3	6.2581e-08	0.3661	0.1784	1	1
1	HDAC11	6.0852e-09	0.3661	0.39571	1	1
1	GOLGA4	9.2738e-21	0.3659	0.47932	1	1
1	C17orf75	8.1292e-18	0.3656	0.39156	1	1
1	ORMDL3	2.7758e-10	0.3655	0.31089	1	1
1	ICA1	4.4848e-10	0.3654	0.42343	1	1
1	ACADM	7.4299e-11	0.3654	0.34368	1	1
1	ACPL2	2.4263e-09	0.3653	0.36343	1	1
1	SIPA1L3	2.523e-09	0.3649	0.29189	1	1
1	SCARNA7	7.9541e-05	0.3649	0.32224	1	1
1	SPOPL	1.5696e-10	0.3647	0.35415	1	1
1	NEIL1	4.7825e-06	0.3647	0.37372	1	1
1	NIPAL3	1.7167e-09	0.3646	0.39882	1	1
1	ZNF577	0.00056418	0.3645	0.28615	1	1
1	SYNGAP1	4.8641e-06	0.3645	0.27199	1	1
1	TIGD3	2.2276e-05	0.3644	0.35974	1	1
1	RAD54L2	1.0808e-07	0.3644	0.4743	1	1
1	LOC113230	0.00012448	0.3642	0.3546	1	1
1	DNAJC28	2.2607e-12	0.364	0.37987	1	1
1	KBTBD10	0.00036173	0.3638	0.27539	1	1
1	AP1M2	3.2313e-12	0.3636	0.34664	1	1
1	ZNF433	4.1267e-13	0.3635	0.40298	1	1
1	RAB11FIP2	2.699e-10	0.3634	0.34258	1	1
1	LHFPL1	0.0063663	0.3634	0.40331	1	1
1	GRLF1	1.2136e-10	0.3632	0.33158	1	1
1	EIF4G3	8.2372e-15	0.3631	0.3663	1	1
1	AKAP1	2.3688e-13	0.3626	0.3931	1	1
1	ANKRD20A3	1.032e-05	0.3626	0.47334	1	1
1	PTCD2	3.313e-12	0.3625	0.28283	1	1
1	SLC30A9	3.5997e-23	0.3625	0.37696	1	1
1	KGFLP2	2.9366e-05	0.3624	0.31373	1	1
1	PBRM1	9.6241e-13	0.362	0.33103	1	1
1	FASTKD1	8.198e-12	0.362	0.2967	1	1
1	ATG2B	5.7792e-15	0.3619	0.36952	1	1
1	LARP1B	9.1229e-18	0.3617	0.40474	1	1
1	LNPEP	0.003278	0.3616	0.27303	1	1
1	EFCAB7	4.5725e-16	0.3616	0.39494	1	1
1	GMCL1L	1.0775e-06	0.3614	0.32099	1	1
1	RNF14	7.3639e-18	0.3609	0.32548	1	1
1	C20orf114	0.069441	0.3607	0.52879	1	1
1	ICK	5.1894e-15	0.3603	0.3885	1	1
1	GTF2A1	4.6823e-06	0.3597	0.45985	1	1
1	ZNF780A	1.7922e-13	0.3595	0.32035	1	1
1	CHIC1	2.4947e-12	0.3595	0.28872	1	1
1	CAPN7	1.9939e-19	0.3595	0.33099	1	1
1	RAPH1	1.9934e-07	0.3593	0.28579	1	1
1	ZNF248	5.2613e-13	0.3589	0.3248	1	1
1	IMPACT	1.249e-12	0.3588	0.3487	1	1
1	ZNF107	9.6112e-07	0.3585	0.32923	1	1
1	CCDC74B	0.01004	0.3584	0.35073	1	1
1	FAM8A1	4.5197e-15	0.3581	0.38958	1	1
1	ZNF302	7.5786e-13	0.3578	0.31729	1	1
1	PHKA1	5.238e-08	0.3578	0.3209	1	1
1	DLG5	3.2475e-09	0.3576	0.39291	1	1
1	ZFX	8.1269e-10	0.3575	0.40728	1	1
1	ETFDH	1.0223e-15	0.3575	0.36924	1	1
1	LRRC49	4.3723e-06	0.357	0.31042	1	1
1	DBT	8.9879e-17	0.3569	0.37268	1	1
1	GOLGB1	3.6266e-21	0.3563	0.40016	1	1
1	KIAA0895	7.2379e-07	0.3561	0.26597	1	1
1	PIGH	8.6971e-17	0.356	0.37094	1	1
1	NAPEPLD	8.146e-17	0.356	0.33962	1	1
1	INTS2	3.5406e-14	0.3557	0.41746	1	1
1	VPRBP	2.8451e-21	0.3551	0.35274	1	1
1	KIAA0232	2.259e-19	0.3549	0.45468	1	1
1	FAM199X	6.4881e-12	0.3542	0.32182	1	1
1	ZFHX3	6.5931e-09	0.3541	0.37432	1	1
1	THAP6	6.3643e-26	0.354	0.39823	1	1
1	LOC100129387	6.4355e-08	0.3538	0.30598	1	1
1	ZNF281	1.0091e-07	0.3536	0.49915	1	1
1	DHRS7	6.1594e-07	0.3535	0.2583	1	1
1	MAP2K4	9.9665e-15	0.3534	0.38513	1	1
1	DCAKD	3.6938e-15	0.3533	0.40416	1	1
1	RPS6KA5	2.3973e-08	0.3529	0.46404	1	1
1	RAPGEF4	0.00055145	0.3527	0.32127	1	1
1	SNX4	1.0716e-16	0.3526	0.32173	1	1
1	CCDC113	3.6249e-08	0.3525	0.39294	1	1
1	BCAM	0.0025784	0.3522	0.29433	1	1
1	CATSPERG	0.012112	0.3522	0.19819	1	1
1	ZNF37A	4.7375e-18	0.3519	0.4278	1	1
1	C11orf71	3.4452e-11	0.3518	0.35879	1	1
1	MAT2A	2.3796e-16	0.3517	0.30027	1	1
1	ZNF740	1.8012e-13	0.3514	0.32796	1	1
1	LPHN1	0.00023407	0.3509	0.078537	1	1
1	TSPAN12	0.026725	0.3509	0.24039	1	1
1	CELSR2	2.9528e-07	0.3509	0.5104	1	1
1	PIGN	7.6325e-15	0.3507	0.36809	1	1
1	FOXN1	0.031879	0.3507	0.33776	1	1
1	ZNF445	7.129e-17	0.3507	0.36086	1	1
1	SLC25A36	1.1644e-14	0.3501	0.25776	1	1
1	ZMYM2	1.2374e-13	0.3501	0.37125	1	1
1	LOC100128573	7.9914e-08	0.35	0.33506	1	1
1	KIAA0100	3.7289e-11	0.3497	0.30462	1	1
1	SLC24A5	0.025406	0.3497	0.26046	1	1
1	?|728788	0.00037673	0.3496	0.2315	1	1
1	UBE2Q2P1	0.001776	0.3493	0.26292	1	1
1	SLC25A23	7.9626e-09	0.3492	0.2668	1	1
1	C19orf46	4.2552e-05	0.3492	0.43051	1	1
1	TSHZ1	1.8036e-13	0.349	0.41317	1	1
1	JMJD7-PLA2G4B	1.5306e-05	0.349	0.24635	1	1
1	MYO15B	0.0059646	0.3488	0.25796	1	1
1	FAM135B	2.5258e-06	0.3488	0.9275	1	1
1	ZNF605	6.8333e-12	0.3486	0.30791	1	1
1	RNF141	4.4895e-15	0.3486	0.392	1	1
1	ASH1L	7.9559e-11	0.3485	0.40345	1	1
1	SECISBP2	3.6204e-20	0.3485	0.34313	1	1
1	PPP1R3D	2.6346e-13	0.3485	0.41027	1	1
1	GRHL2	7.849e-11	0.3481	0.33486	1	1
1	TBC1D3	6.6298e-09	0.3478	0.37201	1	1
1	SUCLG2	3.8403e-10	0.3477	0.29964	1	1
1	ZNF439	8.8551e-06	0.3476	0.22565	1	1
1	ZNF284	2.5846e-09	0.3475	0.42403	1	1
1	KIAA0753	3.1086e-10	0.3475	0.27852	1	1
1	LOC646762	9.2641e-07	0.347	0.34726	1	1
1	SCRN3	2.788e-19	0.347	0.35921	1	1
1	STARD10	5.568e-06	0.3469	0.41523	1	1
1	LOC641298	0.00030703	0.3469	0.42526	1	1
1	TEX9	9.8277e-06	0.3469	0.3391	1	1
1	ZNF33A	1.6728e-19	0.3468	0.38382	1	1
1	FOXRED2	4.8783e-07	0.3467	0.28724	1	1
1	ZNF470	0.0022954	0.3464	0.099897	1	1
1	NEK11	3.0544e-07	0.3463	0.3341	1	1
1	EIF2AK3	4.2268e-11	0.3462	0.37363	1	1
1	TEX14	2.3881e-05	0.3457	0.70709	1	1
1	PPP4R2	9.8425e-10	0.3456	0.40689	1	1
1	KIAA1908	0.0045683	0.3455	0.19993	1	1
1	TRIM4	2.0322e-19	0.3454	0.38133	1	1
1	ZNF223	3.8918e-13	0.3453	0.4222	1	1
1	C14orf4	3.2716e-10	0.3452	0.30323	1	1
1	C9orf64	4.8098e-12	0.3451	0.36188	1	1
1	COLEC10	0.0026159	0.345	0.2608	1	1
1	C1orf56	2.5123e-10	0.3446	0.37683	1	1
1	CCDC91	5.5525e-11	0.3446	0.2855	1	1
1	ZRANB3	9.754e-09	0.3445	0.33634	1	1
1	ABHD14A	1.8559e-09	0.3444	0.40307	1	1
1	TTC12	7.5823e-09	0.3443	0.39264	1	1
1	THTPA	7.3634e-12	0.3443	0.33371	1	1
1	ATXN7L3B	8.7421e-16	0.3443	0.35873	1	1
1	CRAMP1L	7.5408e-10	0.3441	0.3171	1	1
1	ZNF506	1.6148e-10	0.3441	0.24693	1	1
1	SLC23A2	4.0119e-09	0.344	0.41988	1	1
1	SMARCA1	0.0015946	0.344	0.20236	1	1
1	C17orf104	0.0012042	0.3439	0.19128	1	1
1	GPT2	0.0023885	0.3438	0.205	1	1
1	ZNF571	5.0257e-18	0.3435	0.39992	1	1
1	KIAA0114	5.1527e-05	0.3434	0.25751	1	1
1	NCRNA00167	5.845e-08	0.3434	0.34211	1	1
1	ZNF252	4.3916e-14	0.3427	0.39671	1	1
1	ELMOD2	3.4787e-18	0.3427	0.39056	1	1
1	CCDC7	1.6888e-16	0.3426	0.37597	1	1
1	WRB	8.0817e-16	0.3426	0.32166	1	1
1	GPR157	0.00095107	0.3425	0.29528	1	1
1	RMND1	3.1164e-13	0.3425	0.63349	1	1
1	C12orf60	2.9978e-06	0.3424	0.53771	1	1
1	GRIK3	0.0033453	0.3422	0.67486	1	1
1	NPEPPS	5.5866e-14	0.3421	0.37691	1	1
1	AKAP9	4.1963e-08	0.3418	0.33252	1	1
1	AMN1	1.5717e-13	0.3418	0.3877	1	1
1	ZNF558	1.0834e-09	0.3415	0.23361	1	1
1	SLC35E3	4.8643e-11	0.3415	0.41243	1	1
1	KIF3A	1.1711e-11	0.3412	0.38536	1	1
1	PNPO	3.3249e-13	0.341	0.35489	1	1
1	ETNK1	2.9275e-13	0.3409	0.32027	1	1
1	HSD17B7P2	4.8344e-06	0.3407	0.36704	1	1
1	TMED10P1	4.0097e-10	0.3404	0.33505	1	1
1	APPL1	3.554e-15	0.3403	0.33566	1	1
1	TRIM45	5.648e-05	0.3403	0.3057	1	1
1	SERINC4	2.6916e-07	0.3401	0.39388	1	1
1	AFF1	1.0855e-09	0.34	0.3116	1	1
1	NKTR	2.2862e-08	0.34	0.36651	1	1
1	EXD1	0.018199	0.3399	0.093883	1	1
1	DHRS11	6.7303e-05	0.3398	0.24477	1	1
1	ZNF37B	1.716e-07	0.3396	0.3607	1	1
1	AP3M2	2.8829e-06	0.3396	0.28812	1	1
1	SLC22A15	0.00078254	0.3395	0.28369	1	1
1	ZNF611	5.7624e-11	0.3395	0.31687	1	1
1	NPHP1	4.2585e-05	0.3393	0.20881	1	1
1	ZNF14	5.186e-10	0.3392	0.20894	1	1
1	ARHGEF10L	8.9049e-07	0.3392	0.30668	1	1
1	ZNF799	4.6846e-10	0.339	0.34717	1	1
1	LMLN	5.5916e-13	0.339	0.39204	1	1
1	SLC23A1	0.0025988	0.3389	0.47084	1	1
1	ZNF180	4.5243e-16	0.3389	0.32669	1	1
1	NAPB	3.6167e-12	0.3388	0.52426	1	1
1	NKIRAS1	2.8239e-10	0.3387	0.24557	1	1
1	WDR7	2.351e-10	0.3385	0.27338	1	1
1	E2F5	7.3042e-07	0.3382	0.38956	1	1
1	ASB14	2.0807e-09	0.3381	0.35814	1	1
1	RNF208	0.00017619	0.338	0.26786	1	1
1	PBX1	7.736e-05	0.3379	0.3161	1	1
1	ZNF569	2.5205e-07	0.3375	0.23271	1	1
1	DDAH1	3.094e-11	0.3374	0.49554	1	1
1	RMND5A	1.8173e-15	0.3373	0.32729	1	1
1	OTUD3	1.8809e-12	0.3373	0.36919	1	1
1	SUMF1	1.2098e-11	0.3373	0.29158	1	1
1	PRRG2	5.1797e-08	0.3372	0.30571	1	1
1	C15orf58	1.468e-11	0.337	0.31631	1	1
1	FAM174A	3.0051e-15	0.3369	0.4439	1	1
1	RNF103	3.2918e-19	0.3368	0.3655	1	1
1	C8orf51	0.00059532	0.3368	0.23198	1	1
1	LOC100130557	0.00030141	0.3367	0.23502	1	1
1	ALMS1P	0.00036431	0.3367	0.2985	1	1
1	TTC39C	0.00036578	0.3366	0.19353	1	1
1	KIAA1267	3.2388e-20	0.3365	0.37595	1	1
1	ARL1	1.1911e-15	0.3365	0.28379	1	1
1	YTHDC2	7.1746e-17	0.3363	0.39098	1	1
1	C3orf67	0.014198	0.3363	0.28752	1	1
1	C1orf104	0.00064997	0.3363	0.26243	1	1
1	KCTD3	3.4369e-11	0.3361	0.38773	1	1
1	AFTPH	3.8483e-22	0.3358	0.37391	1	1
1	TMEM184C	3.6654e-18	0.3357	0.36554	1	1
1	PAK6	0.04032	0.3355	-0.04066	1	1
1	TRIM7	0.066772	0.3353	0.26615	1	1
1	HACL1	2.2364e-09	0.3351	0.23578	1	1
1	ABHD15	3.4354e-09	0.335	0.33693	1	1
1	ZNF549	2.7843e-05	0.335	0.11653	1	1
1	GFPT1	1.1747e-07	0.3348	0.34439	1	1
1	PIK3C2A	2.625e-13	0.3348	0.3721	1	1
1	SCGN	1.4273e-05	0.3345	0.96371	1	1
1	GTF2IRD2P1	7.2288e-11	0.3342	0.40501	1	1
1	ZBTB25	1.0445e-09	0.3342	0.25366	1	1
1	ZBTB40	2.123e-08	0.3342	0.25047	1	1
1	HIPK3	2.4004e-05	0.334	0.47465	1	1
1	BCAN	0.00064136	0.3338	0.50109	1	1
1	CNNM4	6.1333e-12	0.3337	0.3932	1	1
1	CD164	8.4436e-08	0.3335	0.2447	1	1
1	LONP2	1.1065e-13	0.3334	0.41311	1	1
1	EXD2	6.9737e-19	0.3333	0.36338	1	1
1	BOD1L	1.7015e-11	0.3332	0.35264	1	1
1	HDGFRP3	2.2335e-06	0.333	0.22647	1	1
1	NDUFA5	3.9339e-15	0.333	0.32837	1	1
1	OVOL2	8.3336e-05	0.3327	0.21498	1	1
1	FAM200B	1.6602e-12	0.3326	0.29827	1	1
1	RPGR	1.3029e-11	0.3325	0.32368	1	1
1	BPIL1	0.0067173	0.3325	0.63137	1	1
1	NOS1AP	0.0045104	0.3323	0.30873	1	1
1	MS4A8B	0.00057476	0.3322	0.76217	1	1
1	GBA2	3.6187e-15	0.3321	0.31839	1	1
1	AHCYL1	5.5626e-13	0.332	0.31651	1	1
1	DHX40	8.024e-15	0.3319	0.33591	1	1
1	GZF1	9.625e-15	0.3318	0.33004	1	1
1	WDR60	2.3231e-13	0.3318	0.33938	1	1
1	SGSM2	4.4557e-10	0.3317	0.34593	1	1
1	NHLRC2	3.9831e-06	0.3317	0.34393	1	1
1	CD2AP	6.8552e-14	0.3317	0.38513	1	1
1	TTC37	1.3242e-13	0.3314	0.44987	1	1
1	TUBGCP4	1.7314e-13	0.3313	0.34625	1	1
1	AIG1	1.7282e-12	0.3309	0.40243	1	1
1	HOOK2	2.4819e-06	0.3309	0.19737	1	1
1	ZNF527	1.3164e-12	0.3308	0.27431	1	1
1	KIAA0240	3.7738e-13	0.3305	0.33555	1	1
1	BDP1	1.1109e-11	0.3303	0.35962	1	1
1	ZNF182	8.5627e-14	0.3302	0.31516	1	1
1	ZNF528	2.2321e-06	0.3298	0.35854	1	1
1	C4orf29	2.6346e-13	0.3294	0.36321	1	1
1	ENGASE	7.5378e-05	0.3292	0.29683	1	1
1	LOC647288	1.6618e-07	0.3291	0.28581	1	1
1	CCDC21	9.4008e-09	0.3291	0.3337	1	1
1	SLC35A3	1.943e-08	0.329	0.35183	1	1
1	FLJ42289	0.0028485	0.329	0.29617	1	1
1	FBXL2	0.0033091	0.3288	0.045549	1	1
1	FAM110C	0.00035963	0.3288	0.31051	1	1
1	PEX19	1.0505e-20	0.3286	0.41231	1	1
1	FNBP1L	1.2492e-09	0.3284	0.3239	1	1
1	BRAF	4.0728e-10	0.3282	0.43444	1	1
1	EXOC6B	1.0792e-06	0.3281	0.45164	1	1
1	ZNF627	8.2473e-16	0.3276	0.3451	1	1
1	TADA2B	1.2659e-22	0.3276	0.3426	1	1
1	UEVLD	8.0412e-10	0.3275	0.3817	1	1
1	TEX264	2.1208e-10	0.3274	0.28545	1	1
1	NARG2	1.2304e-18	0.3273	0.31924	1	1
1	FHDC1	4.5431e-05	0.327	0.33491	1	1
1	TAF9B	5.4742e-14	0.3269	0.3366	1	1
1	DUSP28	1.6522e-15	0.3269	0.31607	1	1
1	C6orf52	0.0053055	0.3267	0.22508	1	1
1	SCAI	1.4609e-09	0.3267	0.2949	1	1
1	TSPYL1	2.8818e-11	0.3266	0.31028	1	1
1	ZNF654	1.4059e-15	0.3263	0.32773	1	1
1	MGC57346	7.5941e-07	0.3261	0.17849	1	1
1	C1orf27	3.5754e-15	0.3261	0.37121	1	1
1	UBR3	5.3624e-17	0.326	0.3679	1	1
1	GMCL1	5.9694e-13	0.3256	0.43207	1	1
1	RAD17	8.0062e-25	0.3255	0.35543	1	1
1	ZBED3	0.00038926	0.3254	0.28262	1	1
1	TRIM23	4.1326e-12	0.3254	0.32125	1	1
1	REEP5	1.224e-11	0.3254	0.3326	1	1
1	RNF32	0.00015883	0.3254	0.1998	1	1
1	LOC284023	0.00058999	0.3253	0.12966	1	1
1	PIGO	6.9867e-18	0.3251	0.33662	1	1
1	ZNF525	1.7555e-07	0.3251	0.26167	1	1
1	MBD5	3.7465e-10	0.3246	0.30762	1	1
1	PCF11	1.0354e-16	0.3246	0.34534	1	1
1	C7orf41	6.9756e-05	0.3245	0.29294	1	1
1	KRIT1	2.7242e-17	0.3243	0.31673	1	1
1	BBS1	8.4376e-17	0.3242	0.41895	1	1
1	TMEM106B	1.0312e-11	0.324	0.32917	1	1
1	FBF1	4.9451e-05	0.3239	0.26798	1	1
1	HSDL1	1.6362e-13	0.3237	0.31901	1	1
1	MGC16384	5.7433e-05	0.3234	0.33037	1	1
1	ZNF121	3.2156e-07	0.3232	0.3647	1	1
1	LLGL2	5.9562e-06	0.3231	0.31901	1	1
1	NCRNA00235	9.4867e-06	0.3231	0.29987	1	1
1	C5orf24	3.0767e-13	0.3231	0.3065	1	1
1	ZNF510	7.1845e-10	0.3227	0.29346	1	1
1	LRRC27	1.6376e-05	0.3227	0.1785	1	1
1	PAXIP1	4.5245e-15	0.3227	0.39538	1	1
1	WIPF2	6.85e-16	0.3226	0.36584	1	1
1	PAR1	5.8713e-05	0.3225	0.25632	1	1
1	TARBP1	2.5244e-08	0.3225	0.31878	1	1
1	CNNM2	8.7383e-08	0.3224	0.30658	1	1
1	SETD2	4.4882e-18	0.3222	0.30222	1	1
1	FRS2	2.4153e-10	0.3222	0.45493	1	1
1	C6orf170	3.0349e-06	0.322	0.31375	1	1
1	ZNF582	1.1975e-05	0.3219	0.20503	1	1
1	ZNF41	9.157e-11	0.3219	0.30626	1	1
1	SLC39A9	6.4371e-19	0.3216	0.35408	1	1
1	NPRL2	3.5983e-15	0.3215	0.33456	1	1
1	SMAD5	2.3335e-10	0.3215	0.2728	1	1
1	MAN2A1	0.00029503	0.3213	0.36171	1	1
1	ACLY	8.2361e-12	0.3211	0.31371	1	1
1	ACY1	9.6374e-09	0.3209	0.34728	1	1
1	ELP2P	2.3232e-05	0.3207	0.28302	1	1
1	PI4KA	3.0892e-10	0.3206	0.31041	1	1
1	DTX3	0.00047434	0.3203	0.044499	1	1
1	ZNF175	1.7774e-09	0.3201	0.36704	1	1
1	NDFIP1	1.4881e-13	0.3199	0.28629	1	1
1	ARHGAP12	5.5658e-12	0.3198	0.3505	1	1
1	C4orf41	1.9851e-16	0.3197	0.31409	1	1
1	PSD4	1.0662e-08	0.3196	0.32513	1	1
1	LOC100133991	1.5619e-07	0.3196	0.40977	1	1
1	HNF1A	1.3186e-08	0.3195	0.41356	1	1
1	FAM154A	6.3439e-05	0.3191	0.3015	1	1
1	HEATR5B	1.137e-19	0.319	0.41546	1	1
1	SFXN1	2.4826e-13	0.3189	0.43044	1	1
1	LOC650623	0.017573	0.3188	0.24883	1	1
1	RFFL	2.514e-13	0.3185	0.33495	1	1
1	PNRC2	9.7328e-16	0.3185	0.32453	1	1
1	PRMT10	8.035e-14	0.3185	0.30697	1	1
1	LNX2	2.9485e-11	0.3185	0.36784	1	1
1	RBL2	4.3341e-12	0.3183	0.35777	1	1
1	FAAH2	1.6648e-05	0.3183	0.25762	1	1
1	ANKRD9	0.0020227	0.3182	0.24653	1	1
1	CNGA4	2.1491e-05	0.318	0.33034	1	1
1	UBE3A	8.3583e-20	0.3179	0.35406	1	1
1	EPX	8.7944e-07	0.3178	0.3122	1	1
1	TRIM44	1.3079e-06	0.3177	0.29937	1	1
1	MALAT1	0.00082946	0.3176	0.24975	1	1
1	TBC1D14	2.6198e-15	0.3176	0.33953	1	1
1	TC2N	0.05389	0.3175	-0.021807	1	1
1	TBC1D16	0.00031494	0.3175	0.1964	1	1
1	SNRNP48	5.8778e-14	0.3174	0.31729	1	1
1	PIGP	5.5246e-11	0.3173	0.33319	1	1
1	ATXN10	1.2104e-13	0.3173	0.26738	1	1
1	PROM2	0.00085825	0.3169	0.27939	1	1
1	ZNF655	1.9569e-09	0.3168	0.29458	1	1
1	KIAA1147	7.5092e-10	0.3164	0.35202	1	1
1	PXK	1.4369e-08	0.3162	0.33779	1	1
1	WDR35	7.3111e-12	0.3158	0.38391	1	1
1	CCDC57	6.5387e-07	0.3158	0.27492	1	1
1	ADAT1	1.8699e-07	0.3157	0.37152	1	1
1	KIAA1529	0.016487	0.3155	0.13996	1	1
1	ZNF860	0.00091923	0.3151	0.29324	1	1
1	PFKFB4	0.00023399	0.3151	0.21255	1	1
1	MPI	3.0432e-11	0.3148	0.29318	1	1
1	TMBIM6	9.7893e-23	0.3148	0.3656	1	1
1	LHX4	1.4499e-05	0.3142	0.4528	1	1
1	FAM13A	0.0016041	0.3141	0.27724	1	1
1	ECHDC2	1.7252e-06	0.3141	0.313	1	1
1	HFE	0.014918	0.314	0.069628	1	1
1	XPNPEP3	4.997e-07	0.3134	0.20773	1	1
1	SLC48A1	1.8044e-09	0.3133	0.23689	1	1
1	RERE	2.2254e-14	0.3133	0.32587	1	1
1	ZNF197	1.2472e-17	0.3132	0.31736	1	1
1	ZNF426	0.00013113	0.3131	0.28543	1	1
1	WDR88	1.1715e-05	0.3131	0.26322	1	1
1	PIAS2	3.7825e-13	0.3129	0.35057	1	1
1	CBX4	1.8807e-05	0.3129	0.25839	1	1
1	OPHN1	1.6217e-06	0.3127	0.34321	1	1
1	C1orf172	6.9454e-08	0.3125	0.19807	1	1
1	MYL5	9.0186e-08	0.3124	0.3699	1	1
1	NFIC	3.7994e-05	0.3123	0.30354	1	1
1	CAMTA2	6.5609e-11	0.3122	0.28555	1	1
1	CABYR	0.015146	0.3122	0.20938	1	1
1	CTR9	1.5107e-17	0.3121	0.31824	1	1
1	IFT74	3.2581e-11	0.3119	0.24134	1	1
1	CISD3	3.7295e-10	0.3117	0.3087	1	1
1	CASD1	8.1926e-08	0.3116	0.42456	1	1
1	PRELID2	8.0861e-06	0.3115	0.29343	1	1
1	KBTBD4	1.2174e-14	0.3114	0.3988	1	1
1	PIGL	6.8398e-07	0.3112	0.31404	1	1
1	TMEM67	2.0367e-07	0.311	0.30769	1	1
1	APPBP2	1.6098e-18	0.311	0.38298	1	1
1	LOC401588	1.0561e-07	0.3109	0.28745	1	1
1	DLG3	4.2791e-08	0.3108	0.12521	1	1
1	KIAA1143	1.9092e-14	0.3108	0.29225	1	1
1	TMEM209	5.5096e-14	0.3107	0.33919	1	1
1	CYB561D2	4.4518e-09	0.3106	0.282	1	1
1	CCDC64	0.0017981	0.3106	0.27445	1	1
1	TBC1D8	1.221e-11	0.3105	0.40859	1	1
1	LOC729678	8.3005e-11	0.3104	0.30204	1	1
1	HOMEZ	1.5329e-15	0.3103	0.3526	1	1
1	TTC17	2.5077e-18	0.3102	0.39263	1	1
1	PHLDB3	4.5618e-06	0.31	0.31373	1	1
1	NUMA1	5.9558e-13	0.3098	0.37662	1	1
1	NEAT1	0.0015248	0.3095	0.29724	1	1
1	DBNDD2	0.077942	0.3095	-0.005477	1	1
1	PLK1S1	3.9781e-08	0.3094	0.27665	1	1
1	SFRS12	4.5723e-17	0.309	0.31912	1	1
1	ZNF514	1.0069e-07	0.309	0.30896	1	1
1	HAGH	1.1925e-10	0.3089	0.38124	1	1
1	PTER	3.6959e-07	0.3087	0.21899	1	1
1	GSTM2P1	0.0017763	0.3087	0.32748	1	1
1	MGST2	2.9125e-10	0.3086	0.36489	1	1
1	DYNC2H1	0.00043406	0.3086	0.29631	1	1
1	LOC401052	0.00011879	0.3086	0.26363	1	1
1	MEGF9	3.0342e-05	0.3083	0.30714	1	1
1	HSPA9	8.1744e-13	0.3083	0.29683	1	1
1	TRIP11	2.1693e-09	0.3083	0.3104	1	1
1	ZNF621	2.0939e-14	0.3083	0.36462	1	1
1	LOC100132707	5.6296e-08	0.3082	0.33044	1	1
1	SLC22A23	0.0060662	0.3081	0.13851	1	1
1	NUDT4	9.5564e-08	0.3081	0.36125	1	1
1	KIAA1712	2.6005e-16	0.308	0.36851	1	1
1	MAP4K3	2.2533e-17	0.3076	0.42972	1	1
1	FAM184A	0.0025637	0.3076	0.3317	1	1
1	TSPAN5	0.044694	0.3075	0.27892	1	1
1	C4orf47	0.063787	0.3075	0.10971	1	1
1	DBP	0.00048308	0.3075	0.26574	1	1
1	C11orf1	5.2305e-06	0.3072	0.28813	1	1
1	C6orf155	0.00036243	0.3071	0.5001	1	1
1	ENOSF1	6.4451e-08	0.3067	0.30903	1	1
1	PFAS	1.1277e-08	0.3066	0.25246	1	1
1	ZMYND11	5.9818e-19	0.3065	0.35926	1	1
1	XIAP	8.6003e-18	0.3064	0.26081	1	1
1	FAR1	2.6434e-09	0.3063	0.24363	1	1
1	GBAS	6.0494e-08	0.3062	0.24646	1	1
1	ZNF443	1.3034e-12	0.3062	0.41751	1	1
1	LPIN3	5.1441e-06	0.3062	0.30015	1	1
1	LETM1	2.079e-12	0.3058	0.34532	1	1
1	CSNK1G3	1.334e-15	0.3055	0.32299	1	1
1	SUDS3	1.3279e-18	0.3053	0.31491	1	1
1	ZNF607	2.016e-11	0.3053	0.31903	1	1
1	MBTD1	3.1801e-12	0.3053	0.39217	1	1
1	UBXN8	0.00023472	0.3052	0.21342	1	1
1	LOC652276	5.0155e-09	0.3052	0.30675	1	1
1	C1orf9	1.1966e-09	0.3051	0.30705	1	1
1	SLC44A3	0.0014499	0.3051	0.17239	1	1
1	ZNF148	3.2047e-13	0.3049	0.29434	1	1
1	ZNF347	0.00025992	0.3049	0.2151	1	1
1	USP8	1.2482e-17	0.3048	0.31429	1	1
1	MAPK8IP3	0.00025667	0.3048	0.2439	1	1
1	C5orf60	0.072744	0.3046	0.062229	1	1
1	DICER1	2.6998e-09	0.3046	0.31629	1	1
1	REL	0.00038567	0.3039	0.37715	1	1
1	RBM41	4.2919e-13	0.3038	0.29829	1	1
1	TMTC2	2.4236e-05	0.3037	0.39745	1	1
1	SLTM	4.9852e-24	0.3036	0.3376	1	1
1	C16orf52	5.1511e-13	0.3035	0.32091	1	1
1	KIAA1012	1.3837e-16	0.3035	0.34463	1	1
1	FAM173B	6.0387e-15	0.3035	0.32754	1	1
1	ZNF224	3.5571e-08	0.3032	0.31666	1	1
1	MARCH6	2.1175e-11	0.3031	0.33583	1	1
1	THAP5	5.6805e-15	0.3031	0.30377	1	1
1	LOC100125556	2.8888e-07	0.303	0.2876	1	1
1	ABHD6	7.5957e-06	0.303	0.29601	1	1
1	KAT2B	2.0659e-05	0.3028	0.25952	1	1
1	COQ4	2.8631e-07	0.3028	0.22216	1	1
1	LOC100268168	7.5476e-07	0.3028	0.32355	1	1
1	C3orf49	0.011474	0.3028	0.081195	1	1
1	AKAP11	6.0187e-05	0.3027	0.23503	1	1
1	HECTD1	1.7054e-14	0.3026	0.35339	1	1
1	ZNF417	3.7136e-10	0.3026	0.34632	1	1
1	LOC730668	0.016793	0.3026	0.23266	1	1
1	KIAA0141	1.6668e-17	0.3026	0.30382	1	1
1	ZCWPW1	0.0021185	0.3025	0.15904	1	1
1	GTF2IP1	2.3806e-14	0.3025	0.30574	1	1
1	IFT81	5.1826e-11	0.3025	0.34073	1	1
1	FZD3	0.0072178	0.3024	0.025527	1	1
1	TMEM8B	2.9067e-10	0.3023	0.30616	1	1
1	GUF1	1.8217e-18	0.3022	0.38795	1	1
1	KIAA0319L	1.5313e-16	0.3021	0.38398	1	1
1	ZNF823	6.2659e-08	0.3019	0.36	1	1
1	KIAA0664P3	7.4475e-06	0.3016	0.35338	1	1
1	PCDH1	0.00068492	0.3016	0.21726	1	1
1	ARMCX5	2.7139e-13	0.3013	0.27904	1	1
1	ATRX	9.3005e-09	0.3012	0.29172	1	1
1	USP19	1.2256e-20	0.301	0.27029	1	1
1	COQ10A	3.8545e-05	0.3009	0.26612	1	1
1	MLH3	1.6944e-12	0.3008	0.295	1	1
1	CDK20	2.4938e-09	0.3008	0.24393	1	1
1	TTBK2	0.00022587	0.3008	0.32678	1	1
1	C2orf66	0.0004251	0.3005	0.41554	1	1
1	METTL3	8.7819e-13	0.3004	0.29419	1	1
1	TYW3	2.6348e-15	0.3004	0.3047	1	1
1	TECTA	4.9668e-05	0.3004	0.31786	1	1
1	GPD2	8.8351e-08	0.3003	0.32347	1	1
1	KIF21A	1.5845e-06	0.3003	0.29222	1	1
1	C8orf83	1.8739e-10	0.3003	0.37864	1	1
1	ATPAF1	4.4276e-14	0.3002	0.29959	1	1
1	MIA3	7.9491e-07	0.3001	0.24676	1	1
1	MOSPD2	6.8185e-08	0.3	0.34937	1	1
1	BTBD7	8.7313e-11	0.2999	0.29211	1	1
1	MUT	3.7651e-15	0.2997	0.36133	1	1
1	LUC7L3	6.7857e-09	0.2996	0.27793	1	1
1	MAP3K13	6.6491e-05	0.2996	0.36046	1	1
1	SLC27A4	8.7319e-05	0.2994	0.2894	1	1
1	TRIM37	6.0106e-12	0.2991	0.34736	1	1
1	SNRPN	1.8517e-05	0.2991	0.16077	1	1
1	BBS10	3.3423e-11	0.2987	0.33742	1	1
1	HERC1	1.1435e-09	0.2987	0.31937	1	1
1	HMGCL	1.2886e-11	0.2987	0.31699	1	1
1	PGGT1B	7.7716e-16	0.2986	0.29957	1	1
1	COL4A3BP	3.1e-12	0.2984	0.32736	1	1
1	LYPLA1	1.7634e-09	0.2979	0.37434	1	1
1	RIC8B	3.6174e-15	0.2979	0.36885	1	1
1	KIAA1191	3.3143e-19	0.2977	0.28985	1	1
1	SYP	0.01183	0.2976	0.6652	1	1
1	WHSC1	1.1888e-07	0.2975	0.24292	1	1
1	C17orf47	0.00019817	0.2975	0.28845	1	1
1	ATPBD4	1.7067e-08	0.2971	0.28933	1	1
1	COMMD10	1.1749e-10	0.297	0.25985	1	1
1	BRD2	4.6687e-16	0.2968	0.28893	1	1
1	TCEANC	9.9138e-10	0.2966	0.25743	1	1
1	DYNC2LI1	1.0615e-18	0.2966	0.33693	1	1
1	TBC1D12	3.5157e-13	0.2965	0.41194	1	1
1	MON2	7.6985e-14	0.2964	0.31968	1	1
1	HLCS	1.8198e-14	0.2961	0.29011	1	1
1	IKZF5	9.6721e-15	0.2961	0.32352	1	1
1	UHRF1BP1L	1.5467e-08	0.2959	0.30682	1	1
1	CPT2	1.3688e-12	0.2958	0.31445	1	1
1	USP12	1.9548e-06	0.2957	0.44241	1	1
1	ATRIP	5.4422e-10	0.2956	0.2749	1	1
1	EYA3	8.0928e-06	0.2954	0.34163	1	1
1	UBXN2B	1.6812e-10	0.2954	0.33123	1	1
1	DPP8	1.0906e-07	0.2953	0.38722	1	1
1	KIAA2018	1.062e-12	0.2952	0.34672	1	1
1	KLRA1	0.0023592	0.2951	0.31369	1	1
1	MYO6	1.4443e-06	0.2951	0.31535	1	1
1	NSUN6	3.0085e-12	0.2948	0.34734	1	1
1	ZNF699	0.029236	0.2945	0.17841	1	1
1	FAM83G	0.0017373	0.2945	0.24805	1	1
1	SLC34A3	0.010338	0.2944	0.26675	1	1
1	ZNF540	9.8702e-06	0.2942	0.32946	1	1
1	LOC100270746	7.2334e-05	0.2942	0.26616	1	1
1	HIGD1A	2.0368e-08	0.2941	0.37441	1	1
1	LOC100130015	0.000441	0.294	0.28554	1	1
1	ZFYVE16	4.1134e-11	0.294	0.28077	1	1
1	FXC1	4.981e-13	0.2937	0.27232	1	1
1	SCAPER	1.6057e-07	0.2937	0.30758	1	1
1	TBC1D3H	0.0044991	0.2937	0.31299	1	1
1	ZMYND8	1.8128e-09	0.2932	0.34101	1	1
1	CALCOCO2	2.6319e-11	0.2931	0.27408	1	1
1	COG3	7.0374e-09	0.2931	0.24611	1	1
1	ALG13	1.7717e-15	0.2931	0.33263	1	1
1	PHC3	1.0132e-13	0.2928	0.31078	1	1
1	FGGY	1.799e-05	0.2928	0.27271	1	1
1	ANKRD42	1.2051e-13	0.2928	0.40851	1	1
1	ZSCAN29	5.5615e-18	0.2928	0.35643	1	1
1	BCL2L2	1.2012e-09	0.2928	0.27317	1	1
1	GNPDA2	1.3557e-10	0.2925	0.29572	1	1
1	TRUB1	1.3627e-12	0.2921	0.31986	1	1
1	C15orf17	6.7121e-16	0.2921	0.36419	1	1
1	TMEM175	7.5596e-06	0.2921	0.22069	1	1
1	BNIP3	2.5025e-05	0.292	0.23722	1	1
1	ZNF800	2.6669e-13	0.2919	0.31501	1	1
1	TMF1	1.2918e-16	0.2918	0.35753	1	1
1	NCOR1	2.9444e-10	0.2917	0.34109	1	1
1	OSBPL1A	0.0019697	0.2916	0.098067	1	1
1	C3orf62	1.2587e-07	0.2915	0.26516	1	1
1	RGL2	3.1119e-08	0.2912	0.30391	1	1
1	CNNM3	9.1057e-15	0.2911	0.29598	1	1
1	CDK5RAP3	1.0304e-06	0.291	0.22545	1	1
1	CARKD	1.3063e-08	0.291	0.21534	1	1
1	KLHL9	8.7932e-06	0.2909	0.090659	1	1
1	TOR1AIP2	1.0329e-05	0.2907	0.3257	1	1
1	LOC100133612	0.003007	0.2905	0.23624	1	1
1	C14orf45	2.0451e-05	0.2903	0.3141	1	1
1	IQCC	2.9071e-08	0.2902	0.29248	1	1
1	LRP2BP	2.1208e-06	0.2901	0.27974	1	1
1	HSPA1L	4.8133e-07	0.29	0.28523	1	1
1	KLHDC2	5.1562e-19	0.29	0.37057	1	1
1	TMEM50B	2.3443e-11	0.2896	0.26693	1	1
1	CDKN1B	0.00014939	0.2895	-0.0025952	1	1
1	STXBP3	9.4317e-16	0.2894	0.30088	1	1
1	OR2A4	0.0020362	0.2894	0.26653	1	1
1	SNX13	1.7036e-14	0.2891	0.37374	1	1
1	ATP6AP1	5.1606e-14	0.2888	0.32826	1	1
1	CDH7	0.0029893	0.2888	0.81262	1	1
1	RC3H1	4.2598e-11	0.2887	0.2684	1	1
1	FOXH1	0.0011274	0.2886	0.35469	1	1
1	LOC100129534	0.003997	0.2884	0.22001	1	1
1	COASY	6.3904e-11	0.2883	0.28229	1	1
1	ZNF84	6.3842e-12	0.2878	0.29947	1	1
1	ZNF570	6.6087e-06	0.2877	0.31364	1	1
1	LANCL1	6.7422e-13	0.2875	0.32838	1	1
1	FECH	3.3903e-10	0.2874	0.26491	1	1
1	TTC26	1.6794e-06	0.2873	0.22637	1	1
1	SIK3	4.4236e-06	0.2873	0.2355	1	1
1	KIFC2	0.0024421	0.2872	0.30153	1	1
1	EBAG9	7.5366e-09	0.2869	0.28572	1	1
1	ACAA1	1.5619e-05	0.2869	0.22469	1	1
1	DNMBP	8.2395e-05	0.2868	0.20225	1	1
1	SAR1B	1.5404e-09	0.2866	0.26344	1	1
1	CCDC52	1.8755e-08	0.2865	0.2811	1	1
1	CCNT2	7.2828e-13	0.2864	0.37867	1	1
1	DIRC2	2.3549e-08	0.2861	0.2331	1	1
1	ZNF599	1.8726e-11	0.2858	0.34077	1	1
1	UQCC	2.8219e-16	0.2858	0.29516	1	1
1	TXLNG	5.9674e-06	0.2857	0.36553	1	1
1	CCDC96	8.346e-06	0.2856	0.30235	1	1
1	NUP210	1.0476e-05	0.2855	0.32003	1	1
1	APBB2	3.2683e-05	0.2854	0.28994	1	1
1	AASDH	9.0613e-15	0.2853	0.31527	1	1
1	ATPAF2	4.4088e-07	0.2853	0.20964	1	1
1	LOC25845	3.9374e-09	0.2852	0.23762	1	1
1	PDHB	3.8102e-11	0.2852	0.22821	1	1
1	C5orf55	0.00059893	0.2851	0.17075	1	1
1	EDEM3	3.6583e-09	0.285	0.35638	1	1
1	ZBTB41	1.0342e-08	0.2849	0.36041	1	1
1	ANAPC13	3.3318e-12	0.2848	0.23321	1	1
1	BPTF	4.4621e-12	0.2848	0.36206	1	1
1	USP54	9.0033e-09	0.2845	0.41237	1	1
1	ZNF44	6.2535e-10	0.2844	0.40902	1	1
1	LOC100289341	0.00022587	0.2842	0.22829	1	1
1	TMLHE	4.3762e-07	0.2842	0.17585	1	1
1	ZNF234	5.9078e-11	0.2841	0.29429	1	1
1	PYROXD1	2.5894e-08	0.2841	0.2044	1	1
1	C10orf118	1.4247e-05	0.284	0.32294	1	1
1	COQ6	2.2498e-11	0.284	0.2571	1	1
1	CCDC111	1.502e-09	0.2839	0.26114	1	1
1	POMGNT1	9.3963e-12	0.2836	0.28176	1	1
1	STAG3L3	5.3814e-06	0.2835	0.25172	1	1
1	KLHL15	4.4406e-07	0.2833	0.22403	1	1
1	PHF8	1.167e-13	0.2833	0.37599	1	1
1	MAPKSP1	1.8648e-20	0.2832	0.32837	1	1
1	C4orf42	2.5871e-12	0.283	0.27887	1	1
1	ZNF583	3.8167e-08	0.283	0.31519	1	1
1	WDR16	7.9551e-05	0.2829	0.41643	1	1
1	GOSR1	6.1424e-24	0.2828	0.33533	1	1
1	NAP1L5	0.00031221	0.2827	0.2005	1	1
1	KIAA1279	1.1309e-14	0.2827	0.29538	1	1
1	CBFA2T2	2.2039e-11	0.2826	0.28555	1	1
1	CANX	1.0307e-07	0.2824	0.22421	1	1
1	RAB15	0.019082	0.2822	0.12651	1	1
1	SENP7	1.1572e-09	0.2821	0.32607	1	1
1	ARHGEF12	1.3071e-09	0.2821	0.3227	1	1
1	KIAA0776	4.5231e-11	0.2819	0.30732	1	1
1	C17orf80	2.2327e-13	0.2816	0.27693	1	1
1	IQCD	0.0011368	0.2816	0.21522	1	1
1	GK3P	7.9853e-07	0.2815	0.40581	1	1
1	KIF5B	4.2815e-09	0.2814	0.23516	1	1
1	ZNF551	0.00037308	0.2814	0.25548	1	1
1	CXXC5	0.0027074	0.2813	0.20003	1	1
1	DNAJC19	5.8857e-14	0.2813	0.36493	1	1
1	USP32	6.9413e-10	0.281	0.42756	1	1
1	FAM108C1	0.00034265	0.281	0.24823	1	1
1	ZBTB4	1.7525e-08	0.2809	0.2552	1	1
1	BTD	1.0272e-08	0.2808	0.31546	1	1
1	BPHL	1.9525e-08	0.2807	0.29802	1	1
1	WBP11P1	6.8118e-08	0.2807	0.35493	1	1
1	CCDC117	1.0859e-08	0.2805	0.41941	1	1
1	ZFYVE28	0.0066359	0.2804	0.20255	1	1
1	BTRC	3.7369e-13	0.2803	0.42284	1	1
1	ARHGAP5	1.1508e-08	0.2802	0.25449	1	1
1	TSPAN31	7.7396e-09	0.2801	0.22397	1	1
1	RAB11FIP4	4.1922e-07	0.2801	0.42986	1	1
1	SEPT7P2	3.7689e-06	0.2801	0.24232	1	1
1	MAN2A2	2.804e-09	0.2801	0.28251	1	1
1	GK	1.0822e-05	0.28	0.31683	1	1
1	KIF3B	5.0631e-10	0.2799	0.28257	1	1
1	GNRHR2	3.8581e-08	0.2798	0.24287	1	1
1	GTF2H2C	5.5295e-06	0.2796	0.28904	1	1
1	TCEAL3	0.0011902	0.2796	0.18836	1	1
1	RPL32P3	3.32e-05	0.2793	0.22845	1	1
1	HDDC3	1.0159e-06	0.2793	0.23043	1	1
1	MRPS30	3.3191e-09	0.2793	0.73066	1	1
1	ABHD10	1.7648e-09	0.2792	0.2578	1	1
1	BAZ2B	1.6007e-08	0.2791	0.32059	1	1
1	FAM160A1	0.015042	0.2791	0.17092	1	1
1	MPP5	1.1989e-09	0.279	0.28337	1	1
1	SCARNA9	0.0037298	0.2789	0.25758	1	1
1	PABPC1L	0.065446	0.2788	0.16443	1	1
1	ZNF134	1.9864e-05	0.2787	0.18445	1	1
1	BCORL1	8.598e-05	0.2786	0.18281	1	1
1	GNG3	5.0637e-05	0.2785	0.47045	1	1
1	HELZ	1.1134e-10	0.2785	0.28088	1	1
1	GPHN	2.6784e-06	0.2785	0.29941	1	1
1	TRIM33	4.3032e-11	0.2781	0.25902	1	1
1	NISCH	5.057e-09	0.2779	0.25117	1	1
1	LRRC37A2	1.7968e-05	0.2779	0.32297	1	1
1	ZNF461	1.1956e-10	0.2779	0.30081	1	1
1	TMEM129	3.1816e-09	0.2776	0.26233	1	1
1	DEPDC5	3.5962e-10	0.2775	0.27247	1	1
1	RBM43	2.1062e-07	0.2772	0.35731	1	1
1	CLDN12	8.8867e-11	0.2771	0.35052	1	1
1	PRMT3	5.0472e-11	0.2771	0.3198	1	1
1	ELP2	2.2113e-10	0.277	0.50223	1	1
1	RBKS	1.0453e-05	0.277	0.24338	1	1
1	KIAA1522	1.9553e-07	0.2769	0.283	1	1
1	CCDC114	0.00050977	0.2768	0.37756	1	1
1	SRGAP1	0.00029398	0.2767	0.25845	1	1
1	AP2B1	4.1451e-10	0.2765	0.32348	1	1
1	PPAT	1.2042e-06	0.2764	0.23978	1	1
1	AHI1	1.4685e-08	0.2764	0.34377	1	1
1	C5orf44	1.9248e-18	0.2764	0.28847	1	1
1	TMEM68	2.205e-09	0.2764	0.3242	1	1
1	C2orf43	2.0025e-07	0.2763	0.18201	1	1
1	TNRC6A	3.156e-11	0.2762	0.31893	1	1
1	COG7	4.0278e-14	0.2762	0.26989	1	1
1	GLUD1	1.6949e-08	0.2761	0.30114	1	1
1	RBM18	5.73e-11	0.2759	0.27202	1	1
1	MRFAP1L1	4.125e-14	0.2758	0.28095	1	1
1	LCMT2	3.7825e-13	0.2757	0.29883	1	1
1	C5	0.0058653	0.2756	0.24685	1	1
1	ZNF610	0.00014185	0.2755	0.28214	1	1
1	KDM3B	4.4454e-15	0.2755	0.301	1	1
1	F8	0.014718	0.2754	0.087189	1	1
1	ZBTB44	1.9621e-08	0.2754	0.26935	1	1
1	PTAR1	6.8729e-06	0.2753	0.20653	1	1
1	CCDC47	8.2941e-13	0.2753	0.2913	1	1
1	FANCF	1.1153e-14	0.2752	0.28866	1	1
1	ADHFE1	0.036421	0.2752	0.17809	1	1
1	PDZD8	2.7572e-05	0.2749	0.3122	1	1
1	INADL	7.8438e-06	0.2748	0.28339	1	1
1	TMEM143	3.9517e-07	0.2748	0.22663	1	1
1	SMARCAD1	5.2736e-12	0.2747	0.30737	1	1
1	BRD8	4.2801e-12	0.2746	0.25655	1	1
1	PRO0611	0.002328	0.2746	0.16543	1	1
1	PRDX3	8.6318e-11	0.2744	0.27037	1	1
1	MLANA	2.2625e-05	0.2742	0.23852	1	1
1	PNPLA8	2.4272e-11	0.2742	0.28956	1	1
1	FAM13B	4.7769e-10	0.2742	0.32836	1	1
1	ERCC4	1.6507e-09	0.2741	0.33259	1	1
1	DCAF17	2.8339e-14	0.274	0.32644	1	1
1	GK5	4.3507e-09	0.2739	0.29697	1	1
1	ERCC6	1.8162e-08	0.2739	0.25838	1	1
1	LARP4	2.9133e-12	0.2738	0.30787	1	1
1	TP53BP1	1.7894e-08	0.2737	0.2678	1	1
1	IBTK	5.5295e-11	0.2737	0.25754	1	1
1	EML5	3.0961e-05	0.2735	0.33624	1	1
1	TRMT2B	3.5242e-10	0.2734	0.28589	1	1
1	CCDC66	8.0614e-10	0.2734	0.29747	1	1
1	TMEM41B	6.7018e-14	0.2734	0.32721	1	1
1	NAPG	3.5751e-08	0.2734	0.1921	1	1
1	GAPVD1	1.5214e-11	0.2729	0.245	1	1
1	TSC1	2.874e-12	0.2727	0.30988	1	1
1	FAM102B	0.00034887	0.2725	0.30785	1	1
1	CHM	4.3819e-10	0.2725	0.32046	1	1
1	MAPK8	4.5217e-07	0.2724	0.3651	1	1
[truncated: 25,672 more rows]

## Sheet: LGG glioma
archetype #	Feature Name	P value (Mann-Whitney)	Median Difference	Mean Difference	Significant after Benjamini-Hochberg correction?	Is first bin maximal?
1	REACTOME TRANSLOCATION OF ZAP 70 TO IMMUNOLOGICAL SYNAPSE	2.9285e-23	2.4027	2.307	1	1
1	REACTOME PD1 SIGNALING	8.3274e-24	2.2534	2.0973	1	1
1	REACTOME PHOSPHORYLATION OF CD3 AND TCR ZETA CHAINS	2.7995e-22	2.1359	1.9721	1	1
1	BIOCARTA TCRA PATHWAY	5.8757e-23	2.0481	1.8694	1	1
1	BIOCARTA TCYTOTOXIC PATHWAY	3.2965e-22	1.9206	1.8141	1	1
1	BIOCARTA THELPER PATHWAY	3.6286e-22	1.9106	1.7554	1	1
1	BIOCARTA CTL PATHWAY	6.4251e-24	1.8148	1.7597	1	1
1	BIOCARTA BLYMPHOCYTE PATHWAY	2.1064e-21	1.7805	1.7066	1	1
1	REACTOME GENERATION OF SECOND MESSENGER MOLECULES	1.1285e-22	1.6277	1.4848	1	1
1	KEGG GRAFT VERSUS HOST DISEASE	4.8368e-22	1.5509	1.455	1	1
1	KEGG ALLOGRAFT REJECTION	8.1079e-23	1.5195	1.4905	1	1
1	BIOCARTA ASBCELL PATHWAY	9.6604e-23	1.4841	1.3736	1	1
1	KEGG ASTHMA	9.1605e-20	1.3972	1.3087	1	1
1	BIOCARTA IL17 PATHWAY	7.2128e-23	1.3801	1.4031	1	1
1	BIOCARTA CTLA4 PATHWAY	2.3998e-22	1.3772	1.4041	1	1
1	REACTOME REGULATION OF COMPLEMENT CASCADE	2.2005e-23	1.3691	1.3164	1	1
1	KEGG INTESTINAL IMMUNE NETWORK FOR IGA PRODUCTION	2.4941e-22	1.3056	1.2421	1	1
1	BIOCARTA CLASSIC PATHWAY	3.0456e-19	1.2818	1.3132	1	1
1	REACTOME INTERFERON GAMMA SIGNALING	1.3824e-23	1.2681	1.2087	1	1
1	PID INTEGRIN2 PATHWAY	5.2369e-26	1.2465	1.1444	1	1
1	REACTOME IMMUNOREGULATORY INTERACTIONS BETWEEN A LYMPHOID AND A NON LYMPHOID CELL	3.2338e-22	1.215	1.1184	1	1
1	BIOCARTA NO2IL12 PATHWAY	1.1726e-20	1.213	1.2001	1	1
1	IMMUNOLOGICAL SYNAPSE	2.3179e-20	1.202	1.2067	1	1
1	BIOCARTA LAIR PATHWAY	1.5068e-16	1.1796	1.1576	1	1
1	BIOCARTA LYM PATHWAY	1.2151e-15	1.1724	1.0352	1	1
1	LEUKOCYTE CHEMOTAXIS	2.9682e-20	1.1385	1.0491	1	1
1	COLLAGEN	2.2926e-21	1.1353	1.3134	1	1
1	BIOCARTA PLATELETAPP PATHWAY	9.0918e-25	1.1297	1.0789	1	1
1	KEGG TYPE I DIABETES MELLITUS	1.304e-17	1.1273	0.99024	1	1
1	PID INTEGRIN1 PATHWAY	6.4251e-24	1.1196	1.0961	1	1
1	PID SYNDECAN 1 PATHWAY	1.9354e-23	1.106	1.1397	1	1
1	INTERLEUKIN RECEPTOR ACTIVITY	2.279e-17	1.1045	1.0928	1	1
1	KEGG LEISHMANIA INFECTION	2.6352e-20	1.0738	0.9775	1	1
1	PID INTEGRIN CS PATHWAY	8.8402e-24	1.0598	0.99572	1	1
1	REACTOME INITIAL TRIGGERING OF COMPLEMENT	3.3979e-18	1.0473	1.0993	1	1
1	REACTOME COLLAGEN FORMATION	1.4799e-24	1.0465	1.0873	1	1
1	KEGG PRIMARY IMMUNODEFICIENCY	5.2213e-22	1.0451	1.0206	1	1
1	PID INTEGRIN4 PATHWAY	2.6916e-25	1.0367	1.0273	1	1
1	REACTOME TRAFFICKING AND PROCESSING OF ENDOSOMAL TLR	6.7857e-21	1.0282	0.97715	1	1
1	BIOCARTA COMP PATHWAY	6.3551e-19	1.0279	1.0814	1	1
1	KEGG AUTOIMMUNE THYROID DISEASE	9.6074e-22	1.0167	1.0047	1	1
1	REACTOME CYCLIN A B1 ASSOCIATED EVENTS DURING G2 M TRANSITION	3.9958e-09	1.015	0.75563	1	1
1	REACTOME PLATELET ADHESION TO EXPOSED COLLAGEN	1.8115e-21	1.0032	1.0086	1	1
1	HEPARIN BINDING	1.4053e-25	0.99188	0.96231	1	1
1	DEFENSE RESPONSE TO VIRUS	5.7927e-21	0.9917	0.96823	1	1
1	REACTOME EXTRINSIC PATHWAY FOR APOPTOSIS	3.0139e-25	0.99167	0.97234	1	1
1	REACTOME UNWINDING OF DNA	2.0695e-09	0.98736	0.78514	1	1
1	KEGG COMPLEMENT AND COAGULATION CASCADES	6.6205e-24	0.97988	0.93771	1	1
1	HUMORAL IMMUNE RESPONSE	2.7995e-22	0.97609	0.97623	1	1
1	INTERLEUKIN BINDING	3.9668e-17	0.96556	0.95123	1	1
1	BIOCARTA TOB1 PATHWAY	1.0168e-24	0.96362	1.0131	1	1
1	KEGG ECM RECEPTOR INTERACTION	1.0751e-22	0.95879	0.92782	1	1
1	INTEGRIN COMPLEX	2.3091e-22	0.95554	0.95364	1	1
1	PID FRA PATHWAY	1.2769e-21	0.94158	0.94665	1	1
1	REACTOME TRYPTOPHAN CATABOLISM	6.3579e-21	0.93068	0.86857	1	1
1	ST INTERFERON GAMMA PATHWAY	1.621e-24	0.92846	0.9399	1	1
1	CELLULAR DEFENSE RESPONSE	1.7116e-20	0.92821	0.84928	1	1
1	PID INTEGRIN3 PATHWAY	1.2803e-22	0.92331	0.94973	1	1
1	REACTOME CHEMOKINE RECEPTORS BIND CHEMOKINES	1.0014e-14	0.92261	0.80494	1	1
1	METALLOEXOPEPTIDASE ACTIVITY	2.413e-26	0.92248	0.85692	1	1
1	REACTOME ACYL CHAIN REMODELLING OF PI	6.181e-29	0.92184	0.92698	1	1
1	BIOCARTA TH1TH2 PATHWAY	7.3825e-19	0.9213	0.94709	1	1
1	REACTOME DOWNSTREAM TCR SIGNALING	1.0394e-19	0.91711	0.83536	1	1
1	LEUKOCYTE MIGRATION	1.6048e-20	0.91116	0.8883	1	1
1	COLLAGEN BINDING	8.6726e-17	0.90871	0.90018	1	1
1	BIOCARTA CSK PATHWAY	4.6415e-20	0.90686	0.85221	1	1
1	REACTOME PECAM1 INTERACTIONS	7.2224e-22	0.90007	0.79958	1	1
1	PID IL12 STAT4PATHWAY	7.1086e-21	0.90007	0.93012	1	1
1	PID IL12 2PATHWAY	6.9838e-20	0.89645	0.87495	1	1
1	REACTOME INTERFERON ALPHA BETA SIGNALING	2.3347e-23	0.89627	0.86475	1	1
1	ARYLSULFATASE ACTIVITY	1.4817e-23	0.89047	0.89558	1	1
1	REACTOME G1 S SPECIFIC TRANSCRIPTION	6.2117e-08	0.88623	0.71904	1	1
1	REACTOME THE ACTIVATION OF ARYLSULFATASES	5.1886e-25	0.88423	0.90665	1	1
1	REACTOME TCR SIGNALING	4.3154e-20	0.88281	0.79336	1	1
1	PID UPA UPAR PATHWAY	8.9998e-25	0.8826	0.82158	1	1
1	PID AURORA B PATHWAY	1.3528e-12	0.88248	0.74295	1	1
1	BIOCARTA CASPASE PATHWAY	1.7103e-25	0.88206	0.80418	1	1
1	PID INTEGRIN5 PATHWAY	4.4237e-23	0.87327	0.88444	1	1
1	REACTOME IL 6 SIGNALING	5.3813e-14	0.87312	0.7262	1	1
1	PID SYNDECAN 4 PATHWAY	1.9969e-26	0.86955	0.89736	1	1
1	BIOCARTA SODD PATHWAY	2.3579e-23	0.86951	0.84189	1	1
1	REACTOME G2 M CHECKPOINTS	1.5012e-09	0.86529	0.64806	1	1
1	REACTOME EXTRACELLULAR MATRIX ORGANIZATION	1.7051e-24	0.86251	0.92193	1	1
1	BIOCARTA NKT PATHWAY	1.4253e-18	0.86133	0.88144	1	1
1	REACTOME BILE SALT AND ORGANIC ANION SLC TRANSPORTERS	9.6074e-22	0.85171	0.83084	1	1
1	MITOTIC SISTER CHROMATID SEGREGATION	2.7782e-09	0.84563	0.68544	1	1
1	REACTOME INTEGRIN CELL SURFACE INTERACTIONS	1.4949e-24	0.84451	0.8073	1	1
1	CHROMOSOME CONDENSATION	1.9248e-09	0.84333	0.67329	1	1
1	POSITIVE REGULATION OF T CELL ACTIVATION	5.1767e-20	0.8415	0.76894	1	1
1	BIOCARTA FIBRINOLYSIS PATHWAY	1.846e-21	0.83793	0.96502	1	1
1	REACTOME COMPLEMENT CASCADE	1.3847e-20	0.83077	0.93208	1	1
1	REACTOME REGULATION OF IFNG SIGNALING	2.479e-25	0.82694	0.78345	1	1
1	BIOCARTA D4GDI PATHWAY	5.9334e-23	0.82565	0.76571	1	1
1	POLYSACCHARIDE BINDING	4.2718e-25	0.81618	0.77778	1	1
1	GLYCOSAMINOGLYCAN BINDING	9.1847e-25	0.81452	0.78443	1	1
1	REACTOME ACYL CHAIN REMODELLING OF PS	4.5363e-29	0.81375	0.83401	1	1
1	BIOCARTA GRANULOCYTES PATHWAY	1.4358e-10	0.80974	0.76174	1	1
1	REACTOME CELL SURFACE INTERACTIONS AT THE VASCULAR WALL	4.6652e-24	0.80811	0.73011	1	1
1	IMMUNE RESPONSE	8.8827e-21	0.8065	0.75836	1	1
1	KEGG HEMATOPOIETIC CELL LINEAGE	1.2284e-18	0.80637	0.81764	1	1
1	ACETYLGALACTOSAMINYLTRANSFERASE ACTIVITY	2.1023e-25	0.80629	0.77893	1	1
1	T CELL DIFFERENTIATION	5.9322e-20	0.80437	0.80256	1	1
1	KEGG VIRAL MYOCARDITIS	2.7086e-20	0.80411	0.74015	1	1
1	PID FOXM1PATHWAY	1.904e-10	0.80359	0.63652	1	1
1	REACTOME TRAF6 MEDIATED IRF7 ACTIVATION IN TLR7 8 OR 9 SIGNALING	2.4811e-19	0.80036	0.75737	1	1
1	ADAPTIVE IMMUNE RESPONSE GO 0002460	6.0959e-20	0.79763	0.82503	1	1
1	REACTOME IL 7 SIGNALING	1.2783e-16	0.79641	0.78915	1	1
1	REACTOME ANTIGEN PRESENTATION FOLDING ASSEMBLY AND PEPTIDE LOADING OF CLASS I MHC	2.7195e-25	0.79526	0.79189	1	1
1	REGULATION OF TYROSINE PHOSPHORYLATION OF STAT PROTEIN	4.8315e-23	0.79507	0.75789	1	1
1	JAK STAT CASCADE	3.7092e-26	0.79205	0.76602	1	1
1	ADAPTIVE IMMUNE RESPONSE	3.2524e-20	0.7908	0.81426	1	1
1	PID TOLL ENDOGENOUS PATHWAY	4.0252e-21	0.7901	0.84237	1	1
1	REACTOME CELL EXTRACELLULAR MATRIX INTERACTIONS	1.8495e-22	0.78736	0.78357	1	1
1	SISTER CHROMATID SEGREGATION	6.9482e-09	0.78539	0.62489	1	1
1	INFLAMMATORY RESPONSE	1.0544e-22	0.78436	0.73546	1	1
1	T CELL ACTIVATION	6.599e-21	0.78326	0.81178	1	1
1	BIOCARTA IL12 PATHWAY	2.8615e-19	0.78159	0.8674	1	1
1	PID PLK1 PATHWAY	2.6166e-09	0.77961	0.60077	1	1
1	EXTRACELLULAR MATRIX STRUCTURAL CONSTITUENT	2.0383e-20	0.77761	0.76561	1	1
1	CHEMOKINE RECEPTOR BINDING	2.2502e-13	0.77338	0.70084	1	1
1	REACTOME ACTIVATION OF THE PRE REPLICATIVE COMPLEX	1.4438e-07	0.77066	0.5591	1	1
1	REACTOME PASSIVE TRANSPORT BY AQUAPORINS	2.9089e-17	0.77048	0.78981	1	1
1	EPITHELIAL TO MESENCHYMAL TRANSITION	2.1793e-22	0.7696	0.69709	1	1
1	TYROSINE PHOSPHORYLATION OF STAT PROTEIN	3.6356e-23	0.76772	0.70335	1	1
1	REACTOME CD28 DEPENDENT VAV1 PATHWAY	2.17e-19	0.76746	0.78649	1	1
1	BIOCARTA PML PATHWAY	4.1782e-24	0.76496	0.71126	1	1
1	BIOCARTA IL22BP PATHWAY	1.5872e-21	0.76389	0.73879	1	1
1	REACTOME COSTIMULATION BY THE CD28 FAMILY	4.1786e-21	0.76077	0.77318	1	1
1	REACTOME GPVI MEDIATED ACTIVATION CASCADE	7.2224e-22	0.75513	0.71967	1	1
1	SULFURIC ESTER HYDROLASE ACTIVITY	2.0334e-23	0.75136	0.76665	1	1
1	LOCOMOTORY BEHAVIOR	4.5017e-19	0.75134	0.74934	1	1
1	CYTOKINE BINDING	2.6298e-17	0.7499	0.69728	1	1
1	POSITIVE REGULATION OF LYMPHOCYTE ACTIVATION	1.8423e-20	0.7485	0.73659	1	1
1	BIOCARTA IL10 PATHWAY	8.2137e-16	0.74606	0.75034	1	1
1	POSITIVE REGULATION OF EPITHELIAL CELL PROLIFERATION	4.2685e-19	0.74467	0.70404	1	1
1	BIOCARTA IL7 PATHWAY	1.5672e-15	0.74277	0.6603	1	1
1	BIOCARTA DC PATHWAY	1.5166e-19	0.74035	0.74694	1	1
1	PATTERN BINDING	2.8844e-26	0.73859	0.75601	1	1
1	BIOCARTA MCM PATHWAY	3.9292e-08	0.73832	0.55003	1	1
1	PATTERN RECOGNITION RECEPTOR ACTIVITY	7.8199e-15	0.73365	0.77407	1	1
1	BIOCARTA INFLAM PATHWAY	3.5976e-21	0.73363	0.77848	1	1
1	INTERCELLULAR JUNCTION ASSEMBLY	6.2407e-21	0.72858	0.70899	1	1
1	REGULATION OF VIRAL REPRODUCTION	2.7861e-19	0.72677	0.6953	1	1
1	CASPASE REGULATOR ACTIVITY	5.6885e-25	0.72671	0.70247	1	1
1	CHEMOKINE ACTIVITY	1.8722e-12	0.72281	0.65954	1	1
1	COFACTOR TRANSPORTER ACTIVITY	1.5376e-27	0.72173	0.70909	1	1
1	PROTEINACEOUS EXTRACELLULAR MATRIX	1.1619e-22	0.72089	0.75777	1	1
1	KEGG SYSTEMIC LUPUS ERYTHEMATOSUS	3.6356e-23	0.71981	0.69365	1	1
1	KEGG CELL ADHESION MOLECULES CAMS	3.5113e-19	0.71472	0.62496	1	1
1	REACTOME ACTIVATION OF ATR IN RESPONSE TO REPLICATION STRESS	2.5543e-08	0.71429	0.54984	1	1
1	PID AVB3 INTEGRIN PATHWAY	1.5575e-21	0.71429	0.7025	1	1
1	PID IL23PATHWAY	1.306e-18	0.71365	0.67135	1	1
1	REACTOME REVERSIBLE HYDRATION OF CARBON DIOXIDE	1.5068e-16	0.71249	0.71272	1	1
1	DEFENSE RESPONSE	7.4317e-22	0.71225	0.68441	1	1
1	EXTRACELLULAR MATRIX	1.2197e-22	0.7114	0.74778	1	1
1	KEGG PANTOTHENATE AND COA BIOSYNTHESIS	4.5246e-26	0.70854	0.71534	1	1
1	REACTOME NFKB ACTIVATION THROUGH FADD RIP1 PATHWAY MEDIATED BY CASPASE 8 AND10	5.0836e-25	0.70824	0.70086	1	1
1	PID GLYPICAN 1PATHWAY	2.3314e-22	0.70807	0.64255	1	1
1	IMMUNE SYSTEM PROCESS	3.7001e-21	0.70748	0.69475	1	1
1	UBIQUITIN BINDING	2.6425e-22	0.70708	0.67076	1	1
1	REGULATION OF IMMUNE EFFECTOR PROCESS	3.7794e-24	0.70547	0.70055	1	1
1	POSITIVE REGULATION OF CELL CYCLE	1.8957e-16	0.70454	0.55258	1	1
1	PID INTEGRIN A9B1 PATHWAY	1.1511e-20	0.70287	0.72476	1	1
1	KEGG PHENYLALANINE METABOLISM	6.0959e-20	0.70137	0.67239	1	1
1	REACTOME IKK COMPLEX RECRUITMENT MEDIATED BY RIP1	4.1978e-18	0.6993	0.6983	1	1
1	PID TCR PATHWAY	5.9322e-20	0.69853	0.65274	1	1
1	VITAMIN TRANSPORT	2.1789e-23	0.69843	0.70456	1	1
1	REGULATION OF T CELL ACTIVATION	8.8027e-19	0.69804	0.68887	1	1
1	HEMATOPOIETIN INTERFERON CLASSD200 DOMAIN CYTOKINE RECEPTOR ACTIVITY	3.6652e-12	0.69783	0.65514	1	1
1	KEGG ANTIGEN PROCESSING AND PRESENTATION	1.3863e-19	0.6977	0.6723	1	1
1	ENDOPLASMIC RETICULUM LUMEN	1.027e-26	0.69538	0.65364	1	1
1	REACTOME ACTIVATION OF IRF3 IRF7 MEDIATED BY TBK1 IKK EPSILON	1.3222e-20	0.69358	0.69234	1	1
1	INTERLEUKIN 8 BIOSYNTHETIC PROCESS	3.8363e-17	0.69162	0.65173	1	1
1	EXTRACELLULAR MATRIX PART	1.7922e-20	0.69069	0.71871	1	1
1	RESPONSE TO WOUNDING	9.8502e-23	0.68982	0.65065	1	1
1	PID IL4 2PATHWAY	3.4919e-22	0.68907	0.66373	1	1
1	REACTOME ADVANCED GLYCOSYLATION ENDPRODUCT RECEPTOR SIGNALING	2.5431e-26	0.68865	0.65154	1	1
1	REACTOME INTERFERON SIGNALING	2.7335e-23	0.68827	0.64843	1	1
1	G PROTEIN COUPLED RECEPTOR BINDING	4.2393e-13	0.68807	0.60172	1	1
1	LYMPHOCYTE ACTIVATION	1.1945e-20	0.68639	0.71531	1	1
1	REACTOME REGULATION OF INSULIN LIKE GROWTH FACTOR IGF ACTIVITY BY INSULIN LIKE GROWTH FACTOR BINDING PROTEINS IGFBPS	7.6403e-15	0.6841	0.68534	1	1
1	REGULATION OF LYMPHOCYTE ACTIVATION	5.0511e-18	0.6828	0.65748	1	1
1	REACTOME ACYL CHAIN REMODELLING OF PG	4.1003e-25	0.6765	0.64043	1	1
1	REGULATION OF IMMUNE SYSTEM PROCESS	1.1615e-21	0.67629	0.64996	1	1
1	SPINDLE	2.4974e-08	0.67567	0.48111	1	1
1	PID AVB3 OPN PATHWAY	2.7199e-22	0.67566	0.64914	1	1
1	BIOCARTA ACE2 PATHWAY	1.5571e-16	0.67494	0.66623	1	1
1	IMMUNE EFFECTOR PROCESS	1.2151e-23	0.67414	0.688	1	1
1	SMALL CONJUGATING PROTEIN BINDING	1.9546e-23	0.67405	0.65101	1	1
1	BIOCARTA IL2RB PATHWAY	3.0821e-22	0.67335	0.62802	1	1
1	PROTEASE INHIBITOR ACTIVITY	2.2135e-25	0.67329	0.67712	1	1
1	REACTOME CHYLOMICRON MEDIATED LIPID TRANSPORT	6.8359e-25	0.67264	0.70391	1	1
1	REACTOME KERATAN SULFATE DEGRADATION	5.0066e-12	0.66643	0.81888	1	1
1	POSITIVE REGULATION OF IMMUNE SYSTEM PROCESS	6.4174e-21	0.66427	0.63658	1	1
1	ST STAT3 PATHWAY	1.1598e-13	0.66349	0.61505	1	1
1	PID CD8TCRPATHWAY	9.412e-20	0.66283	0.64051	1	1
1	CYTOPLASM ORGANIZATION AND BIOGENESIS	2.3805e-21	0.66077	0.63441	1	1
1	CARBOHYDRATE BINDING	1.1028e-24	0.66026	0.6542	1	1
1	PHOSPHOLIPASE A2 ACTIVITY	3.7077e-23	0.65742	0.70427	1	1
1	REACTOME GROWTH HORMONE RECEPTOR SIGNALING	3.9911e-26	0.6571	0.65106	1	1
1	INTERFERON GAMMA PRODUCTION	3.7214e-14	0.65687	0.65246	1	1
1	SERINE TYPE ENDOPEPTIDASE INHIBITOR ACTIVITY	7.6474e-23	0.65646	0.62798	1	1
1	REGULATION OF JAK STAT CASCADE	1.2079e-22	0.65461	0.62954	1	1
1	RESPONSE TO VIRUS	1.2005e-19	0.65184	0.62781	1	1
1	DETECTION OF BIOTIC STIMULUS	7.764e-14	0.64944	0.60632	1	1
1	REACTOME ACYL CHAIN REMODELLING OF PE	5.6939e-28	0.64842	0.65938	1	1
1	PID LYMPHANGIOGENESIS PATHWAY	8.0929e-18	0.647	0.62334	1	1
1	SPINDLE POLE	6.8675e-09	0.64532	0.46318	1	1
1	PID NFAT TFPATHWAY	2.0252e-17	0.64471	0.64838	1	1
1	BIOCARTA AMI PATHWAY	1.5151e-18	0.64047	0.63847	1	1
1	CHROMOSOME SEGREGATION	2.7616e-09	0.63815	0.48249	1	1
1	COFACTOR TRANSPORT	6.4157e-23	0.63797	0.72038	1	1
1	REACTOME E2F MEDIATED REGULATION OF DNA REPLICATION	4.6144e-08	0.63602	0.5243	1	1
1	KEGG CYTOKINE CYTOKINE RECEPTOR INTERACTION	8.4452e-20	0.63255	0.61087	1	1
1	LEUKOCYTE ACTIVATION	8.756e-20	0.63126	0.65292	1	1
1	BIOCARTA IL2 PATHWAY	6.2068e-18	0.63072	0.59501	1	1
1	REACTOME RIP MEDIATED NFKB ACTIVATION VIA DAI	1.4211e-24	0.62926	0.66023	1	1
1	BIOCARTA G2 PATHWAY	7.3209e-10	0.62628	0.45487	1	1
1	REACTOME DNA STRAND ELONGATION	3.4443e-09	0.62583	0.51581	1	1
1	B CELL ACTIVATION	3.6291e-20	0.6246	0.63057	1	1
1	REGULATION OF I KAPPAB KINASE NF KAPPAB CASCADE	2.1378e-28	0.61771	0.60724	1	1
1	POSITIVE REGULATION OF CYTOKINE BIOSYNTHETIC PROCESS	5.9086e-13	0.61493	0.62101	1	1
1	REACTOME ACYL CHAIN REMODELLING OF PC	4.7815e-27	0.61363	0.62744	1	1
1	REACTOME SIGNAL REGULATORY PROTEIN SIRP FAMILY INTERACTIONS	4.9547e-14	0.61215	0.5493	1	1
1	BIOCARTA VITCB PATHWAY	3.6106e-14	0.6093	0.62497	1	1
1	PID AURORA A PATHWAY	2.2795e-12	0.60503	0.45872	1	1
1	BIOCARTA IL1R PATHWAY	9.1204e-18	0.60429	0.54036	1	1
1	REACTOME DEGRADATION OF THE EXTRACELLULAR MATRIX	1.0017e-17	0.60395	0.57943	1	1
1	BIOCARTA SET PATHWAY	3.3732e-14	0.59459	0.49206	1	1
1	CYTOKINE ACTIVITY	6.599e-21	0.59387	0.55949	1	1
1	POSITIVE REGULATION OF I KAPPAB KINASE NF KAPPAB CASCADE	1.6086e-28	0.59372	0.59125	1	1
1	CHROMOSOMEPERICENTRIC REGION	1.2121e-08	0.5923	0.46931	1	1
1	SUPEROXIDE METABOLIC PROCESS	1.6307e-15	0.59172	0.52318	1	1
1	REACTOME G0 AND EARLY G1	2.4144e-08	0.58629	0.46769	1	1
1	CELL ACTIVATION	5.0375e-20	0.58559	0.6154	1	1
1	PID AMB2 NEUTROPHILS PATHWAY	2.2343e-20	0.58384	0.60662	1	1
1	REGULATION OF PEPTIDYL TYROSINE PHOSPHORYLATION	6.6287e-22	0.58325	0.54303	1	1
1	PID IL27PATHWAY	3.6161e-15	0.58235	0.61596	1	1
1	REACTOME CYTOKINE SIGNALING IN IMMUNE SYSTEM	5.6902e-22	0.58093	0.56074	1	1
1	BIOCARTA STATHMIN PATHWAY	1.0994e-09	0.58022	0.52731	1	1
1	PID P53DOWNSTREAMPATHWAY	2.6293e-27	0.57975	0.54932	1	1
1	INTERCELLULAR JUNCTION ASSEMBLY AND MAINTENANCE	1.3739e-19	0.57633	0.54982	1	1
1	SA CASPASE CASCADE	2.403e-21	0.5757	0.55046	1	1
1	REGULATION OF MITOSIS	3.6771e-09	0.5756	0.45392	1	1
1	MITOTIC SPINDLE ORGANIZATION AND BIOGENESIS	1.9811e-05	0.57508	0.41792	1	1
1	EXOPEPTIDASE ACTIVITY	9.9794e-22	0.57505	0.53713	1	1
1	PID IL2 STAT5PATHWAY	6.6514e-17	0.57476	0.54633	1	1
1	I KAPPAB KINASE NF KAPPAB CASCADE	4.8916e-28	0.57327	0.57163	1	1
1	NEGATIVE REGULATION OF SECRETION	6.7598e-19	0.57201	0.61154	1	1
1	RESPONSE TO OTHER ORGANISM	1.022e-18	0.57065	0.54768	1	1
1	BLOOD COAGULATION	2.7335e-20	0.56944	0.5867	1	1
1	PID ATR PATHWAY	2.6272e-08	0.56888	0.40661	1	1
1	BIOCARTA STEM PATHWAY	8.4135e-16	0.56677	0.55852	1	1
1	REACTOME REPAIR SYNTHESIS FOR GAP FILLING BY DNA POL IN TC NER	3.0135e-13	0.56611	0.50618	1	1
1	BIOCARTA INTRINSIC PATHWAY	1.0775e-19	0.56563	0.58882	1	1
1	SPINDLE ORGANIZATION AND BIOGENESIS	1.396e-05	0.56498	0.40142	1	1
1	COAGULATION	1.2786e-19	0.56301	0.56429	1	1
1	SH3 SH2 ADAPTOR ACTIVITY	1.2689e-26	0.5626	0.56658	1	1
1	BIOCARTA IL4 PATHWAY	1.8929e-17	0.56084	0.56496	1	1
1	RUFFLE	1.1622e-27	0.56022	0.57165	1	1
1	PID DELTANP63PATHWAY	1.1374e-19	0.5593	0.52181	1	1
1	POSITIVE REGULATION OF IMMUNE RESPONSE	8.2049e-19	0.55791	0.53126	1	1
1	POSITIVE REGULATION OF MULTICELLULAR ORGANISMAL PROCESS	4.9225e-18	0.55781	0.52996	1	1
1	REACTOME TRAF6 MEDIATED NFKB ACTIVATION	1.3766e-25	0.55671	0.52345	1	1
1	HEMOSTASIS	4.9436e-21	0.55474	0.56336	1	1
1	REACTOME VEGF LIGAND RECEPTOR INTERACTIONS	1.1337e-09	0.55422	0.50475	1	1
1	REACTOME MITOTIC PROMETAPHASE	5.505e-08	0.5536	0.42068	1	1
1	KEGG TOLL LIKE RECEPTOR SIGNALING PATHWAY	9.2773e-18	0.55357	0.50732	1	1
1	RECEPTOR COMPLEX	6.3458e-14	0.55337	0.50389	1	1
1	LEUKOCYTE DIFFERENTIATION	4.8322e-19	0.55062	0.5504	1	1
1	LYSOSOMAL MEMBRANE	1.1791e-19	0.54796	0.54806	1	1
1	SUGAR BINDING	2.5676e-14	0.54596	0.53682	1	1
1	RESPONSE TO EXTERNAL STIMULUS	1.5441e-19	0.54399	0.50046	1	1
1	BIOCARTA HSP27 PATHWAY	8.0498e-17	0.54383	0.50132	1	1
1	PML BODY	4.461e-21	0.54182	0.48098	1	1
1	BIOCARTA LECTIN PATHWAY	1.2064e-10	0.54104	0.61485	1	1
1	LYMPHOCYTE DIFFERENTIATION	1.8769e-17	0.53998	0.52456	1	1
1	BIOCARTA MTA3 PATHWAY	3.5649e-23	0.53243	0.54401	1	1
1	REACTOME PTM GAMMA CARBOXYLATION HYPUSINE FORMATION AND ARYLSULFATASE ACTIVATION	8.58e-24	0.5324	0.50011	1	1
1	M PHASE OF MITOTIC CELL CYCLE	3.2149e-08	0.52965	0.39612	1	1
1	BIOCARTA RANMS PATHWAY	3.6066e-06	0.52959	0.37131	1	1
1	RNA CATABOLIC PROCESS	3.0728e-19	0.52882	0.46949	1	1
1	GLUCOSAMINE METABOLIC PROCESS	4.8368e-22	0.52777	0.49388	1	1
1	REACTOME DNA REPLICATION	3.1875e-09	0.5262	0.4092	1	1
1	N ACETYLGLUCOSAMINE METABOLIC PROCESS	3.6314e-21	0.52488	0.5084	1	1
1	BIOCARTA P53 PATHWAY	1.0017e-17	0.52485	0.49018	1	1
1	MESODERM DEVELOPMENT	5.0609e-15	0.52335	0.43381	1	1
1	REACTOME MITOTIC M M G1 PHASES	8.5692e-09	0.52332	0.39318	1	1
1	REACTOME TRAF3 DEPENDENT IRF ACTIVATION PATHWAY	1.6852e-23	0.52161	0.53615	1	1
1	IMMUNE SYSTEM DEVELOPMENT	9.2183e-21	0.52054	0.5252	1	1
1	BIOCARTA FAS PATHWAY	6.7229e-21	0.51959	0.46964	1	1
1	CALCIUM MEDIATED SIGNALING	4.0668e-15	0.51896	0.50823	1	1
1	RESPONSE TO BIOTIC STIMULUS	1.1615e-21	0.51862	0.51081	1	1
1	PID E2F PATHWAY	4.6399e-12	0.51831	0.41537	1	1
1	KEGG FOCAL ADHESION	2.5874e-20	0.51752	0.49101	1	1
1	EXCRETION	2.7613e-19	0.51746	0.52345	1	1
1	CARBOXYPEPTIDASE ACTIVITY	7.1091e-16	0.51513	0.5423	1	1
1	MYELOID LEUKOCYTE DIFFERENTIATION	4.2996e-12	0.51485	0.48199	1	1
1	POSITIVE REGULATION OF TRANSLATION	7.8221e-14	0.5146	0.52488	1	1
1	MITOSIS	3.9292e-08	0.51235	0.38572	1	1
1	BIOCARTA ATM PATHWAY	2.8798e-15	0.51181	0.44783	1	1
1	PID IL5 PATHWAY	1.6699e-15	0.51104	0.49008	1	1
1	KEGG LEUKOCYTE TRANSENDOTHELIAL MIGRATION	6.2304e-23	0.51084	0.49093	1	1
1	REACTOME RESPONSE TO ELEVATED PLATELET CYTOSOLIC CA2	5.567e-20	0.50997	0.54568	1	1
1	REACTOME SIGNALING BY ILS	3.5321e-15	0.50962	0.4543	1	1
1	PRODUCTION OF MOLECULAR MEDIATOR OF IMMUNE RESPONSE	6.0256e-22	0.50916	0.56387	1	1
1	POSITIVE REGULATION OF PROTEIN SECRETION	1.3385e-12	0.50847	0.50452	1	1
1	LIPID RAFT	9.3525e-14	0.50644	0.4778	1	1
1	BIOCARTA RB PATHWAY	7.8205e-06	0.50619	0.36012	1	1
1	HEMOPOIETIC OR LYMPHOID ORGAN DEVELOPMENT	6.8584e-20	0.50271	0.50952	1	1
1	BIOCARTA ERYTH PATHWAY	4.7746e-11	0.5023	0.48361	1	1
1	HEMOPOIESIS	3.7699e-19	0.49985	0.4986	1	1
1	CORNIFIED ENVELOPE	5.4218e-14	0.49974	0.42783	1	1
1	MICROTUBULE MOTOR ACTIVITY	9.7045e-08	0.49935	0.40084	1	1
1	ANTIGEN BINDING	1.1684e-13	0.49787	0.5264	1	1
1	AMINO ACID DERIVATIVE BIOSYNTHETIC PROCESS	1.7159e-11	0.49606	0.37469	1	1
1	KEGG P53 SIGNALING PATHWAY	3.901e-17	0.49594	0.44351	1	1
1	ACTIVATION OF IMMUNE RESPONSE	1.1042e-15	0.49563	0.49835	1	1
1	PID IL6 7PATHWAY	6.2075e-20	0.49508	0.50709	1	1
1	KEGG JAK STAT SIGNALING PATHWAY	4.6459e-23	0.49346	0.47464	1	1
1	REACTOME EXTENSION OF TELOMERES	8.0279e-08	0.49344	0.38889	1	1
1	REACTOME AMYLOIDS	8.9654e-21	0.49234	0.47694	1	1
1	PID TCPTP PATHWAY	5.3639e-16	0.48826	0.42709	1	1
1	REACTOME DEPOSITION OF NEW CENPA CONTAINING NUCLEOSOMES AT THE CENTROMERE	3.8645e-14	0.48808	0.47092	1	1
1	INTERLEUKIN 8 PRODUCTION	4.1049e-14	0.48741	0.48605	1	1
1	CARBONATE DEHYDRATASE ACTIVITY	1.1609e-08	0.48662	0.47447	1	1
1	REACTOME SYNTHESIS OF PA	1.806e-23	0.48644	0.49787	1	1
1	DNA INTEGRITY CHECKPOINT	7.9918e-12	0.48568	0.40148	1	1
1	MOLECULAR ADAPTOR ACTIVITY	1.9056e-24	0.4854	0.51329	1	1
1	REACTOME HYALURONAN UPTAKE AND DEGRADATION	5.6178e-20	0.48434	0.54569	1	1
1	GROWTH FACTOR BINDING	8.2756e-09	0.48396	0.41459	1	1
1	OXIDOREDUCTASE ACTIVITY GO 0016706	2.9658e-22	0.48198	0.49365	1	1
1	REGULATION OF DEFENSE RESPONSE	6.4174e-21	0.48189	0.52944	1	1
1	BIOCARTA DNAFRAGMENT PATHWAY	3.3301e-10	0.48114	0.39118	1	1
1	REACTOME CASPASE MEDIATED CLEAVAGE OF CYTOSKELETAL PROTEINS	1.3101e-20	0.48099	0.48921	1	1
1	PID PTP1BPATHWAY	7.9438e-22	0.48052	0.47247	1	1
1	REACTOME NOD1 2 SIGNALING PATHWAY	9.5177e-18	0.47907	0.4351	1	1
1	NEGATIVE REGULATION OF CYTOKINE BIOSYNTHETIC PROCESS	4.7348e-10	0.4788	0.4264	1	1
1	REACTOME ANTIGEN PROCESSING CROSS PRESENTATION	1.4105e-20	0.47815	0.47714	1	1
1	KEGG GLYCOSAMINOGLYCAN BIOSYNTHESIS KERATAN SULFATE	1.3847e-20	0.47388	0.49794	1	1
1	BIOCARTA CYTOKINE PATHWAY	1.4115e-12	0.47383	0.50482	1	1
1	NEGATIVE REGULATION OF IMMUNE SYSTEM PROCESS	2.136e-10	0.4735	0.42026	1	1
1	INSULIN LIKE GROWTH FACTOR RECEPTOR BINDING	3.4771e-15	0.47255	0.4554	1	1
1	BIOCARTA SKP2E2F PATHWAY	3.9945e-11	0.47218	0.42721	1	1
1	PID PI3KCIPATHWAY	5.9701e-17	0.47154	0.44205	1	1
1	PROTEIN BINDING BRIDGING	8.6328e-26	0.47142	0.47712	1	1
1	KEGG CYTOSOLIC DNA SENSING PATHWAY	4.3128e-17	0.4705	0.41883	1	1
1	REACTOME IL RECEPTOR SHC SIGNALING	4.1309e-15	0.47024	0.47435	1	1
1	REACTOME SYNTHESIS SECRETION AND INACTIVATION OF GIP	5.5825e-22	0.46976	0.4395	1	1
1	EXTRACELLULAR REGION	2.2079e-21	0.46966	0.47124	1	1
1	PID P73PATHWAY	6.4418e-22	0.46963	0.43712	1	1
1	REACTOME METAL ION SLC TRANSPORTERS	1.5553e-18	0.46927	0.44391	1	1
1	PROTEIN SECRETION	1.3616e-19	0.46865	0.47076	1	1
1	KEGG ALPHA LINOLENIC ACID METABOLISM	9.0918e-25	0.46824	0.47048	1	1
1	PID AP1 PATHWAY	6.8014e-15	0.46781	0.4749	1	1
1	POSITIVE REGULATION OF SIGNAL TRANSDUCTION	1.0917e-24	0.46491	0.4587	1	1
1	REACTOME HOMOLOGOUS RECOMBINATION REPAIR OF REPLICATION INDEPENDENT DOUBLE STRAND BREAKS	1.7884e-08	0.46472	0.38874	1	1
1	NITROGEN COMPOUND BIOSYNTHETIC PROCESS	4.8135e-20	0.4643	0.41009	1	1
1	PID HIVNEFPATHWAY	2.6021e-23	0.46424	0.43391	1	1
1	KINETOCHORE	3.0399e-08	0.46252	0.34596	1	1
1	KEGG SMALL CELL LUNG CANCER	1.1374e-19	0.46241	0.41411	1	1
1	KEGG NICOTINATE AND NICOTINAMIDE METABOLISM	2.6112e-20	0.46235	0.48496	1	1
1	UNFOLDED PROTEIN RESPONSE	8.3901e-17	0.46151	0.39171	1	1
1	BIOCARTA ATRBRCA PATHWAY	3.0675e-10	0.45955	0.38907	1	1
1	PID CXCR4 PATHWAY	2.5642e-17	0.4589	0.43745	1	1
1	KEGG GLYCOSAMINOGLYCAN DEGRADATION	6.8801e-19	0.45887	0.41642	1	1
1	REGULATION OF IMMUNE RESPONSE	2.7848e-18	0.45847	0.46385	1	1
1	PHOSPHOLIPASE C ACTIVATION	6.6131e-16	0.45835	0.47567	1	1
1	REACTOME OTHER SEMAPHORIN INTERACTIONS	7.9868e-13	0.45819	0.41403	1	1
1	SH2 DOMAIN BINDING	5.0424e-13	0.45689	0.4127	1	1
1	LEADING EDGE	1.0736e-25	0.45658	0.43795	1	1
1	REACTOME REGULATED PROTEOLYSIS OF P75NTR	1.4907e-20	0.45629	0.40705	1	1
1	ST TUMOR NECROSIS FACTOR PATHWAY	1.9719e-21	0.45571	0.45527	1	1
1	REACTOME POL SWITCHING	1.2502e-09	0.45534	0.38485	1	1
1	POSITIVE REGULATION OF CELL DIFFERENTIATION	1.2151e-15	0.45519	0.43639	1	1
1	M PHASE	1.1247e-08	0.45508	0.36671	1	1
1	KEGG HOMOLOGOUS RECOMBINATION	3.0023e-11	0.45506	0.43453	1	1
1	PID TAP63PATHWAY	3.1082e-25	0.455	0.49094	1	1
1	POSITIVE REGULATION OF DEFENSE RESPONSE	4.2622e-15	0.45402	0.53696	1	1
1	REACTOME EARLY PHASE OF HIV LIFE CYCLE	4.0034e-18	0.45374	0.40086	1	1
1	REACTOME NEF MEDIATES DOWN MODULATION OF CELL SURFACE RECEPTORS BY RECRUITING THEM TO CLATHRIN ADAPTERS	9.6814e-18	0.45319	0.44517	1	1
1	PID CD8TCRDOWNSTREAMPATHWAY	9.2702e-15	0.45287	0.49301	1	1
1	BIOCARTA CD40 PATHWAY	9.6814e-18	0.45272	0.43094	1	1
1	G1 PHASE OF MITOTIC CELL CYCLE	1.3326e-07	0.45247	0.37327	1	1
1	RIBONUCLEASE ACTIVITY	4.462e-19	0.4515	0.41092	1	1
1	PHOSPHOLIPASE ACTIVITY	1.3879e-16	0.45025	0.47809	1	1
1	REACTOME CELL CYCLE CHECKPOINTS	3.1247e-11	0.44981	0.36918	1	1
1	REGULATION OF DNA REPLICATION	1.3721e-12	0.44913	0.39118	1	1
1	G1 S TRANSITION OF MITOTIC CELL CYCLE	6.3935e-14	0.44861	0.3817	1	1
1	ESTABLISHMENT OF ORGANELLE LOCALIZATION	3.851e-07	0.44827	0.35467	1	1
1	KEGG CELL CYCLE	9.5673e-09	0.44821	0.33877	1	1
1	DNA REPLICATION INITIATION	4.4708e-07	0.44802	0.35178	1	1
1	REACTOME GRB2 SOS PROVIDES LINKAGE TO MAPK SIGNALING FOR INTERGRINS	2.7041e-15	0.44759	0.44938	1	1
1	REACTOME HS GAG DEGRADATION	8.5915e-18	0.44758	0.45991	1	1
1	PID THROMBIN PAR4 PATHWAY	1.0695e-15	0.44744	0.3984	1	1
1	REGULATION OF BODY FLUID LEVELS	2.1653e-18	0.4467	0.45621	1	1
1	REACTOME CALNEXIN CALRETICULIN CYCLE	1.2157e-25	0.44626	0.41466	1	1
1	PEPTIDYL TYROSINE MODIFICATION	3.4495e-19	0.44529	0.39304	1	1
1	KEGG NATURAL KILLER CELL MEDIATED CYTOTOXICITY	3.111e-17	0.44495	0.41831	1	1
1	BIOCARTA DEATH PATHWAY	1.1028e-24	0.44444	0.44443	1	1
1	ISOPRENOID METABOLIC PROCESS	1.163e-15	0.4441	0.45264	1	1
1	PEPTIDYL TYROSINE PHOSPHORYLATION	3.6062e-19	0.44408	0.39059	1	1
1	REACTOME REGULATION OF IFNA SIGNALING	4.2718e-25	0.44355	0.40187	1	1
1	PID EPOPATHWAY	4.6348e-18	0.44255	0.42093	1	1
1	PROTEOGLYCAN METABOLIC PROCESS	4.3637e-18	0.44235	0.41042	1	1
1	REACTOME INNATE IMMUNE SYSTEM	9.8359e-21	0.43934	0.4112	1	1
1	BIOCARTA RANKL PATHWAY	4.0394e-12	0.43894	0.44303	1	1
1	REACTOME NEGATIVE REGULATORS OF RIG I MDA5 SIGNALING	1.4441e-21	0.43742	0.40904	1	1
1	ER GOLGI INTERMEDIATE COMPARTMENT	1.7883e-23	0.43733	0.4601	1	1
1	PID ATF2 PATHWAY	5.8611e-16	0.4363	0.4023	1	1
1	ACETYLGLUCOSAMINYLTRANSFERASE ACTIVITY	3.3979e-18	0.43608	0.40963	1	1
1	REACTOME LIPOPROTEIN METABOLISM	6.8491e-21	0.43566	0.47727	1	1
1	BIOCARTA BCELLSURVIVAL PATHWAY	6.201e-16	0.43555	0.41523	1	1
1	APOPTOTIC MITOCHONDRIAL CHANGES	4.6658e-08	0.43444	0.36544	1	1
1	KEGG MISMATCH REPAIR	9.2254e-12	0.43427	0.3854	1	1
1	KEGG AMINO SUGAR AND NUCLEOTIDE SUGAR METABOLISM	3.4799e-25	0.4341	0.41858	1	1
1	NEGATIVE REGULATION OF DNA REPLICATION	7.4958e-09	0.4333	0.35555	1	1
1	PID ECADHERIN STABILIZATION PATHWAY	1.7983e-19	0.43258	0.41938	1	1
1	ST T CELL SIGNAL TRANSDUCTION	4.564e-16	0.43233	0.40897	1	1
1	REACTOME IL 2 SIGNALING	1.8196e-16	0.43213	0.41859	1	1
1	REACTOME N GLYCAN TRIMMING IN THE ER AND CALNEXIN CALRETICULIN CYCLE	2.2184e-26	0.43145	0.42017	1	1
1	CELL CYCLE CHECKPOINT GO 0000075	7.6726e-09	0.43112	0.37329	1	1
1	BIOCARTA P53HYPOXIA PATHWAY	1.2369e-16	0.43066	0.38965	1	1
1	EXTRACELLULAR REGION PART	9.4973e-20	0.43029	0.43392	1	1
1	REACTOME SYNTHESIS OF DNA	1.2864e-13	0.43027	0.37772	1	1
1	WOUND HEALING	5.9206e-17	0.42954	0.45994	1	1
1	PID INTEGRIN A4B1 PATHWAY	3.118e-16	0.42917	0.39504	1	1
1	VACUOLAR MEMBRANE	2.9845e-18	0.42836	0.44151	1	1
1	REACTOME THE ROLE OF NEF IN HIV1 REPLICATION AND DISEASE PATHOGENESIS	2.1785e-16	0.42835	0.41415	1	1
1	METALLOPEPTIDASE ACTIVITY	1.1391e-16	0.42823	0.39178	1	1
1	REACTOME G1 S TRANSITION	3.2471e-10	0.42702	0.34835	1	1
1	LIPASE ACTIVITY	1.0489e-16	0.42588	0.45461	1	1
1	ST INTERLEUKIN 4 PATHWAY	2.4372e-19	0.4254	0.42777	1	1
1	DRUG BINDING	1.3263e-17	0.42448	0.3676	1	1
1	PID A6B1 A6B4 INTEGRIN PATHWAY	4.7451e-22	0.42406	0.41521	1	1
1	REACTOME SEMA4D IN SEMAPHORIN SIGNALING	1.4048e-14	0.42345	0.38763	1	1
1	REACTOME KERATAN SULFATE KERATIN METABOLISM	2.1719e-14	0.42334	0.46641	1	1
1	REGULATION OF PROTEIN IMPORT INTO NUCLEUS	5.7571e-14	0.42255	0.43483	1	1
1	MITOTIC CELL CYCLE CHECKPOINT	2.5949e-07	0.42198	0.36781	1	1
1	POSITIVE REGULATION OF CELL PROLIFERATION	3.5961e-20	0.42192	0.41657	1	1
1	PID IL2 1PATHWAY	1.2889e-16	0.4219	0.39019	1	1
1	REACTOME IMMUNE SYSTEM	1.5723e-21	0.42057	0.40497	1	1
1	REACTOME PROCESSIVE SYNTHESIS ON THE LAGGING STRAND	1.3371e-09	0.42042	0.35439	1	1
1	TISSUE MORPHOGENESIS	3.0356e-13	0.42039	0.3779	1	1
1	REACTOME ER PHAGOSOME PATHWAY	3.4871e-18	0.42034	0.39279	1	1
1	KEGG T CELL RECEPTOR SIGNALING PATHWAY	1.8346e-16	0.41955	0.40242	1	1
1	BIOCARTA TCR PATHWAY	6.4555e-16	0.4195	0.4009	1	1
1	BRUSH BORDER	1.641e-13	0.41882	0.45256	1	1
1	REACTOME SMOOTH MUSCLE CONTRACTION	3.3995e-08	0.41813	0.39121	1	1
1	POSITIVE REGULATION OF DNA METABOLIC PROCESS	1.6647e-11	0.41762	0.40966	1	1
1	REACTOME LATENT INFECTION OF HOMO SAPIENS WITH MYCOBACTERIUM TUBERCULOSIS	3.8355e-14	0.41664	0.37256	1	1
1	PID SMAD2 3NUCLEARPATHWAY	3.2542e-18	0.4157	0.35323	1	1
1	REACTOME CELL CYCLE MITOTIC	5.8802e-08	0.41523	0.31033	1	1
1	KEGG TRYPTOPHAN METABOLISM	3.4919e-22	0.41463	0.46992	1	1
1	DNA RECOMBINATION	1.2151e-15	0.41449	0.35438	1	1
1	CELL DIVISION	4.0479e-10	0.41441	0.33347	1	1
1	BIOCARTA SPRY PATHWAY	1.3056e-13	0.41344	0.35886	1	1
1	REACTOME REMOVAL OF THE FLAP INTERMEDIATE FROM THE C STRAND	1.1011e-12	0.41333	0.3903	1	1
1	NEGATIVE REGULATION OF HYDROLASE ACTIVITY	1.6846e-07	0.41312	0.34887	1	1
1	VASCULATURE DEVELOPMENT	1.1615e-21	0.41165	0.45679	1	1
1	G1 PHASE	2.8263e-08	0.41041	0.3307	1	1
1	KEGG NOD LIKE RECEPTOR SIGNALING PATHWAY	2.4451e-12	0.41034	0.41437	1	1
1	VIRAL GENOME REPLICATION	1.3409e-11	0.4096	0.44948	1	1
1	REACTOME LAGGING STRAND SYNTHESIS	1.6141e-08	0.40928	0.35989	1	1
1	PID TCRCALCIUMPATHWAY	3.5321e-15	0.40866	0.46466	1	1
1	REACTOME TRAF6 MEDIATED INDUCTION OF TAK1 COMPLEX	2.2164e-12	0.4065	0.40714	1	1
1	LYSOSOME ORGANIZATION AND BIOGENESIS	5.4768e-22	0.40611	0.40004	1	1
1	KEGG TYROSINE METABOLISM	4.206e-17	0.40534	0.40512	1	1
1	DNA MODIFICATION	1.1168e-12	0.40523	0.39586	1	1
1	REACTOME NUCLEOTIDE BINDING DOMAIN LEUCINE RICH REPEAT CONTAINING RECEPTOR NLR SIGNALING PATHWAYS	1.0037e-12	0.40201	0.33596	1	1
1	CELLULAR POLYSACCHARIDE METABOLIC PROCESS	2.4796e-12	0.40153	0.38188	1	1
1	CYTOKINE SECRETION	1.3136e-08	0.40105	0.36183	1	1
1	PID CASPASE PATHWAY	1.7576e-24	0.40073	0.44018	1	1
1	CYCLIC NUCLEOTIDE METABOLIC PROCESS	2.97e-13	0.40071	0.38567	1	1
1	CELL CYCLE PHASE	2.5241e-09	0.40057	0.31859	1	1
1	BIOCARTA NUCLEARRS PATHWAY	2.667e-14	0.40021	0.33709	1	1
1	REACTOME S PHASE	4.0394e-12	0.39963	0.34726	1	1
1	REGULATION OF PROTEIN SECRETION	6.1692e-13	0.39934	0.38853	1	1
1	SA B CELL RECEPTOR COMPLEXES	9.3568e-18	0.39859	0.42644	1	1
1	KEGG LYSOSOME	1.9223e-22	0.3982	0.38643	1	1
1	PID FANCONI PATHWAY	2.3739e-08	0.39816	0.32705	1	1
1	BIOCARTA CARDIACEGF PATHWAY	2.5526e-10	0.39765	0.33406	1	1
1	PID PRLSIGNALINGEVENTSPATHWAY	4.2685e-19	0.39698	0.39569	1	1
1	KEGG APOPTOSIS	2.8846e-17	0.39616	0.34828	1	1
1	BIOCARTA UCALPAIN PATHWAY	8.3692e-20	0.39257	0.39875	1	1
1	BIOCARTA TID PATHWAY	8.4491e-15	0.39182	0.39699	1	1
1	REGULATION OF CELL SHAPE	9.7849e-15	0.39153	0.38447	1	1
1	CARBOXYLESTERASE ACTIVITY	2.3211e-18	0.39057	0.42645	1	1
1	REACTOME FANCONI ANEMIA PATHWAY	7.7914e-08	0.39013	0.32797	1	1
1	BIOCARTA TNFR1 PATHWAY	1.3838e-17	0.38939	0.33787	1	1
1	UDP GLYCOSYLTRANSFERASE ACTIVITY	2.5859e-17	0.38895	0.35165	1	1
1	REACTOME M G1 TRANSITION	5.6396e-10	0.38732	0.32304	1	1
1	REACTOME A TETRASACCHARIDE LINKER SEQUENCE IS REQUIRED FOR GAG SYNTHESIS	5.3011e-14	0.38698	0.34998	1	1
1	SERINE TYPE PEPTIDASE ACTIVITY	2.5591e-15	0.38686	0.3456	1	1
1	REACTOME P130CAS LINKAGE TO MAPK SIGNALING FOR INTEGRINS	4.1672e-14	0.38646	0.41198	1	1
1	CELL SUBSTRATE ADHERENS JUNCTION	1.6535e-11	0.38423	0.29454	1	1
1	CELL CYCLE PROCESS	7.4958e-09	0.38316	0.30358	1	1
1	EXTRACELLULAR SPACE	7.4072e-15	0.38279	0.34066	1	1
1	REACTOME RIG I MDA5 MEDIATED INDUCTION OF IFN ALPHA BETA PATHWAYS	4.1425e-25	0.38152	0.38711	1	1
1	MYELOID CELL DIFFERENTIATION	3.8212e-12	0.38125	0.40583	1	1
1	REACTOME KINESINS	0.00069104	0.38086	0.24363	1	1
1	PID SHP2 PATHWAY	7.4884e-13	0.38027	0.33906	1	1
1	COATED VESICLE MEMBRANE	1.0394e-19	0.37988	0.34361	1	1
1	RESPONSE TO XENOBIOTIC STIMULUS	9.0489e-21	0.37881	0.4355	1	1
1	BIOCARTA TNFR2 PATHWAY	2.652e-17	0.37856	0.38715	1	1
1	PID HIF1 TFPATHWAY	3.1644e-20	0.37833	0.42617	1	1
1	BIOCARTA MITOCHONDRIA PATHWAY	1.8009e-25	0.37774	0.34978	1	1
1	CELLULAR CATION HOMEOSTASIS	1.4942e-11	0.37744	0.41657	1	1
1	REACTOME CELL CYCLE	4.2397e-09	0.37703	0.29959	1	1
1	AROMATIC COMPOUND METABOLIC PROCESS	4.5557e-18	0.37601	0.35608	1	1
1	CYSTEINE TYPE PEPTIDASE ACTIVITY	7.9273e-20	0.3759	0.34113	1	1
1	NUCLEAR UBIQUITIN LIGASE COMPLEX	2.136e-10	0.37579	0.33219	1	1
1	REACTOME TAK1 ACTIVATES NFKB BY PHOSPHORYLATION AND ACTIVATION OF IKKS COMPLEX	2.4031e-18	0.37573	0.37243	1	1
1	PID SYNDECAN 2 PATHWAY	9.0489e-21	0.37543	0.3877	1	1
1	VACUOLE ORGANIZATION AND BIOGENESIS	2.3308e-19	0.37533	0.36665	1	1
1	MITOTIC CELL CYCLE	8.1599e-08	0.37472	0.28212	1	1
1	NEGATIVE REGULATION OF PHOSPHORYLATION	1.0188e-07	0.3746	0.39313	1	1
1	SERINE HYDROLASE ACTIVITY	4.7178e-15	0.37394	0.3384	1	1
1	BIOCARTA HIVNEF PATHWAY	1.824e-23	0.37277	0.37074	1	1
1	REACTOME MEIOTIC RECOMBINATION	6.1482e-15	0.37254	0.37477	1	1
1	BIOCARTA IL6 PATHWAY	9.2254e-12	0.37088	0.35449	1	1
1	KEGG ETHER LIPID METABOLISM	2.6873e-14	0.37081	0.37596	1	1
1	SERINE TYPE ENDOPEPTIDASE ACTIVITY	2.0516e-12	0.37016	0.3065	1	1
1	REACTOME PYRIMIDINE METABOLISM	2.0384e-19	0.37002	0.33632	1	1
1	REACTOME MITOTIC G1 G1 S PHASES	6.3275e-09	0.37	0.31427	1	1
1	REGULATION OF CELL MORPHOGENESIS	1.6223e-16	0.36986	0.39365	1	1
1	BIOCARTA GATA3 PATHWAY	6.6869e-14	0.36967	0.36134	1	1
1	REACTOME APC CDC20 MEDIATED DEGRADATION OF NEK2A	9.5061e-07	0.36951	0.29859	1	1
1	REACTOME SYNTHESIS OF BILE ACIDS AND BILE SALTS VIA 24 HYDROXYCHOLESTEROL	1.6848e-09	0.36921	0.38582	1	1
1	REGULATION OF CYTOKINE SECRETION	1.1165e-07	0.36901	0.33601	1	1
1	BIOCARTA NTHI PATHWAY	1.1406e-09	0.36845	0.35888	1	1
1	SPINDLE MICROTUBULE	0.00054452	0.36841	0.23733	1	1
1	DNA DEPENDENT ATPASE ACTIVITY	3.1306e-07	0.36779	0.26113	1	1
1	SULFUR COMPOUND BIOSYNTHETIC PROCESS	9.818e-17	0.36773	0.37736	1	1
1	PID TRAIL PATHWAY	4.0351e-15	0.36693	0.3335	1	1
1	AMINE BIOSYNTHETIC PROCESS	5.629e-14	0.36619	0.3394	1	1
1	SOLUBLE FRACTION	2.2225e-18	0.36526	0.31543	1	1
1	KEGG BLADDER CANCER	1.8807e-15	0.36486	0.39015	1	1
1	ANGIOGENESIS	9.9322e-18	0.36471	0.38616	1	1
1	REACTOME ADAPTIVE IMMUNE SYSTEM	5.8786e-20	0.36456	0.33641	1	1
1	POSITIVE REGULATION OF RESPONSE TO STIMULUS	5.5351e-10	0.36361	0.32429	1	1
1	REGULATION OF PROTEIN AMINO ACID PHOSPHORYLATION	3.4571e-18	0.36324	0.34932	1	1
1	REACTOME PHOSPHORYLATION OF THE APC C	7.051e-07	0.36298	0.29222	1	1
1	POSITIVE REGULATION OF PHOSPHATE METABOLIC PROCESS	1.3151e-17	0.36248	0.34547	1	1
1	CATION HOMEOSTASIS	1.6873e-11	0.36163	0.40595	1	1
1	INNATE IMMUNE RESPONSE	1.2713e-14	0.3613	0.4025	1	1
1	REACTOME MHC CLASS II ANTIGEN PRESENTATION	9.5631e-16	0.36064	0.32687	1	1
1	BIOCARTA CELLCYCLE PATHWAY	1.0078e-07	0.36033	0.37065	1	1
1	DNA POLYMERASE ACTIVITY	5.6271e-09	0.36003	0.32971	1	1
1	NEGATIVE REGULATION OF PROGRAMMED CELL DEATH	3.433e-21	0.35966	0.36288	1	1
1	BIOGENIC AMINE METABOLIC PROCESS	2.028e-14	0.35937	0.34327	1	1
1	KEGG ABC TRANSPORTERS	2.3294e-11	0.35931	0.30979	1	1
1	KEGG DNA REPLICATION	1.2564e-07	0.35866	0.33824	1	1
1	REACTOME INTRINSIC PATHWAY	3.8677e-18	0.35831	0.39168	1	1
1	REGULATION OF SECRETION	3.7656e-09	0.35774	0.30497	1	1
1	HOMOPHILIC CELL ADHESION	3.1572e-06	0.35763	0.21284	1	1
1	REACTOME FORMATION OF FIBRIN CLOT CLOTTING CASCADE	3.3988e-14	0.35706	0.41205	1	1
1	CELL PROJECTION PART	5.2364e-12	0.35595	0.37574	1	1
1	CYSTEINE TYPE ENDOPEPTIDASE ACTIVITY	3.4919e-22	0.35569	0.34703	1	1
1	REACTOME PLATELET ACTIVATION SIGNALING AND AGGREGATION	1.2248e-15	0.35553	0.32017	1	1
1	AMINO SUGAR METABOLIC PROCESS	5.3643e-18	0.35496	0.32878	1	1
1	PID VEGF VEGFR PATHWAY	5.6917e-05	0.3524	0.36402	1	1
1	REACTOME TRAF6 MEDIATED IRF7 ACTIVATION	1.8209e-24	0.35127	0.34465	1	1
1	REACTOME KERATAN SULFATE BIOSYNTHESIS	3.087e-10	0.35043	0.40002	1	1
1	ADHERENS JUNCTION	2.9123e-12	0.3504	0.29537	1	1
1	ACUTE INFLAMMATORY RESPONSE	3.4238e-09	0.34992	0.4075	1	1
1	ION HOMEOSTASIS	3.3126e-13	0.34973	0.39037	1	1
1	BIOCARTA G1 PATHWAY	6.5954e-12	0.34866	0.37142	1	1
1	REACTOME INHIBITION OF THE PROTEOLYTIC ACTIVITY OF APC C REQUIRED FOR THE ONSET OF ANAPHASE BY MITOTIC SPINDLE CHECKPOINT COMPONENTS	3.911e-07	0.34843	0.29089	1	1
1	BIOPOLYMER BIOSYNTHETIC PROCESS	1.5068e-16	0.34782	0.33382	1	1
1	ELECTRON CARRIER ACTIVITY	2.5187e-21	0.34759	0.34566	1	1
1	REACTOME ENDOGENOUS STEROLS	2.1294e-06	0.34737	0.34349	1	1
1	PROTEOLYSIS	1.925e-24	0.34711	0.33543	1	1
1	PROTEIN AMINO ACID O LINKED GLYCOSYLATION	6.7857e-21	0.34668	0.36831	1	1
1	PID NECTIN PATHWAY	1.4134e-15	0.3463	0.30817	1	1
1	REACTOME RNA POL I PROMOTER OPENING	1.3036e-10	0.34597	0.33414	1	1
1	KEGG OTHER GLYCAN DEGRADATION	7.1186e-18	0.3458	0.34621	1	1
1	BIOCARTA PTC1 PATHWAY	0.0014223	0.34574	0.2417	1	1
1	REACTOME CHROMOSOME MAINTENANCE	5.7872e-12	0.34498	0.32433	1	1
1	ANATOMICAL STRUCTURE FORMATION	1.45e-19	0.34447	0.3896	1	1
1	REGULATION OF SMALL GTPASE MEDIATED SIGNAL TRANSDUCTION	5.9701e-17	0.34391	0.32871	1	1
1	NEGATIVE REGULATION OF APOPTOSIS	1.2168e-20	0.34388	0.35071	1	1
1	REGULATION OF NUCLEOCYTOPLASMIC TRANSPORT	9.3703e-11	0.34371	0.31292	1	1
1	REACTOME APC C CDC20 MEDIATED DEGRADATION OF CYCLIN B	2.9411e-07	0.34315	0.29482	1	1
1	GLUCAN METABOLIC PROCESS	1.1105e-07	0.34302	0.31613	1	1
1	POSITIVE REGULATION OF PHOSPHORYLATION	6.7628e-17	0.34232	0.33398	1	1
1	REACTOME HYALURONAN METABOLISM	7.1732e-13	0.34224	0.37116	1	1
1	PID CMYB PATHWAY	7.3825e-19	0.3421	0.31798	1	1
1	PID ECADHERIN KERATINOCYTE PATHWAY	1.325e-13	0.34113	0.32701	1	1
1	LYTIC VACUOLE	2.4422e-16	0.33929	0.35933	1	1
1	LYSOSOME	2.4422e-16	0.33929	0.35933	1	1
1	VACUOLE	2.7861e-19	0.33923	0.37273	1	1
1	PID P38ALPHABETADOWNSTREAMPATHWAY	5.5808e-21	0.33921	0.33034	1	1
1	TUBE DEVELOPMENT	1.5923e-15	0.33877	0.35045	1	1
1	DNA DAMAGE RESPONSESIGNAL TRANSDUCTION RESULTING IN INDUCTION OF APOPTOSIS	5.3011e-14	0.33838	0.32999	1	1
1	PID ANGIOPOIETINRECEPTOR PATHWAY	1.4129e-18	0.33825	0.35913	1	1
1	APICAL PLASMA MEMBRANE	5.0407e-08	0.33793	0.35851	1	1
1	SENSORY ORGAN DEVELOPMENT	1.8364e-14	0.33778	0.29864	1	1
1	REACTOME POST TRANSLATIONAL MODIFICATION SYNTHESIS OF GPI ANCHORED PROTEINS	3.0216e-27	0.33775	0.3118	1	1
1	AMYLOID PRECURSOR PROTEIN METABOLIC PROCESS	1.3653e-16	0.33752	0.30463	1	1
1	BASEMENT MEMBRANE	1.2162e-12	0.33623	0.31553	1	1
1	OXIDOREDUCTASE ACTIVITY ACTING ON THE ALDEHYDE OR OXO GROUP OF DONORS	1.846e-12	0.33585	0.36936	1	1
1	DOUBLE STRANDED RNA BINDING	1.2869e-10	0.33569	0.30585	1	1
1	REACTOME DOUBLE STRAND BREAK REPAIR	1.6846e-07	0.3349	0.28445	1	1
1	REACTOME GLYCOGEN BREAKDOWN GLYCOGENOLYSIS	3.2149e-08	0.33468	0.32295	1	1
1	REACTOME BASIGIN INTERACTIONS	9.4025e-09	0.33402	0.30752	1	1
1	HYDROLASE ACTIVITY HYDROLYZING N GLYCOSYL COMPOUNDS	1.9911e-16	0.33396	0.31805	1	1
1	REACTOME GLYCOSPHINGOLIPID METABOLISM	2.249e-19	0.33342	0.33691	1	1
1	REACTOME ORC1 REMOVAL FROM CHROMATIN	1.1676e-15	0.33308	0.31787	1	1
1	INDUCTION OF APOPTOSIS BY INTRACELLULAR SIGNALS	2.4155e-19	0.33193	0.32993	1	1
1	RESPONSE TO STRESS	9.3843e-24	0.32923	0.32993	1	1
1	REACTOME HDL MEDIATED LIPID TRANSPORT	4.7307e-08	0.32921	0.31035	1	1
1	REACTOME SEMA3A PLEXIN REPULSION SIGNALING BY INHIBITING INTEGRIN ADHESION	4.5727e-15	0.32847	0.33719	1	1
1	CHROMATIN BINDING	7.1215e-08	0.32773	0.25898	1	1
1	SA REG CASCADE OF CYCLIN EXPR	4.8344e-05	0.32655	0.34666	1	1
1	LAMELLIPODIUM	2.128e-18	0.32614	0.34552	1	1
1	FOCAL ADHESION	4.3372e-10	0.32574	0.25686	1	1
1	REACTOME REGULATION OF MITOTIC CELL CYCLE	2.0953e-12	0.32449	0.32204	1	1
1	REACTOME ACTIVATED TLR4 SIGNALLING	8.8027e-19	0.32298	0.31027	1	1
1	REACTOME TIE2 SIGNALING	5.1404e-15	0.32269	0.36855	1	1
1	PID EPHA2 FWDPATHWAY	1.3856e-15	0.32236	0.2638	1	1
1	REACTOME HEMOSTASIS	8.9702e-16	0.32194	0.27796	1	1
1	ST GA12 PATHWAY	1.2162e-12	0.32091	0.34037	1	1
1	NEGATIVE REGULATION OF BIOSYNTHETIC PROCESS	3.4602e-13	0.3206	0.29565	1	1
1	REGULATION OF SIGNAL TRANSDUCTION	2.8266e-22	0.31958	0.30966	1	1
1	NEGATIVE REGULATION OF PHOSPHATE METABOLIC PROCESS	1.589e-07	0.31932	0.35976	1	1
1	EXONUCLEASE ACTIVITY	4.229e-15	0.31911	0.28797	1	1
1	SKELETAL DEVELOPMENT	4.6811e-15	0.31871	0.35626	1	1
1	CYTOKINESIS	6.5858e-07	0.31868	0.26963	1	1
1	ACTIN BINDING	3.24e-15	0.31791	0.26829	1	1
1	ENZYME INHIBITOR ACTIVITY	2.1096e-18	0.31753	0.33854	1	1
1	DEFENSE RESPONSE TO BACTERIUM	7.8733e-13	0.3173	0.33164	1	1
1	REACTOME TRIF MEDIATED TLR3 SIGNALING	7.1086e-21	0.31694	0.29226	1	1
1	BIOCARTA HIF PATHWAY	1.9257e-12	0.31692	0.32197	1	1
1	REACTOME TELOMERE MAINTENANCE	2.7211e-13	0.31684	0.32156	1	1
1	INTERPHASE	3.0571e-09	0.31677	0.25249	1	1
1	PYRIMIDINE NUCLEOTIDE METABOLIC PROCESS	4.7053e-10	0.31649	0.30173	1	1
1	RHO GTPASE ACTIVATOR ACTIVITY	4.1508e-10	0.31647	0.23408	1	1
1	PID BARD1PATHWAY	6.9678e-08	0.31623	0.30168	1	1
1	OLIGOSACCHARYL TRANSFERASE COMPLEX	7.764e-14	0.31561	0.30058	1	1
1	PROGRAMMED CELL DEATH	2.0571e-20	0.31527	0.29756	1	1
1	PID EPHA FWDPATHWAY	9.7839e-10	0.3142	0.33942	1	1
1	REGULATION OF PROGRAMMED CELL DEATH	8.639e-21	0.31397	0.30018	1	1
1	REACTOME SEMA3A PAK DEPENDENT AXON REPULSION	2.9327e-12	0.31382	0.31116	1	1
1	REACTOME RESOLUTION OF AP SITES VIA THE MULTIPLE NUCLEOTIDE PATCH REPLACEMENT PATHWAY	5.5911e-12	0.31324	0.28257	1	1
1	DNA DAMAGE CHECKPOINT	2.9953e-15	0.31299	0.28136	1	1
1	STEROID BIOSYNTHETIC PROCESS	8.7235e-11	0.31287	0.29007	1	1
1	REGULATION OF DNA METABOLIC PROCESS	6.6765e-13	0.31251	0.26386	1	1
1	VACUOLAR PART	1.4591e-15	0.31201	0.34481	1	1
1	3 5 EXONUCLEASE ACTIVITY	3.1904e-17	0.31187	0.27542	1	1
1	BIOCARTA STRESS PATHWAY	5.8955e-18	0.3113	0.29897	1	1
1	PID RB 1PATHWAY	1.6966e-15	0.31044	0.2844	1	1
1	PID ILK PATHWAY	4.5029e-21	0.31028	0.30685	1	1
1	PID TNFPATHWAY	1.57e-16	0.30974	0.28703	1	1
1	ORGANELLE LOCALIZATION	4.4938e-07	0.30972	0.24768	1	1
1	DNA DIRECTED DNA POLYMERASE ACTIVITY	3.8312e-07	0.30966	0.26803	1	1
1	REGULATION OF RAS PROTEIN SIGNAL TRANSDUCTION	5.0061e-13	0.30953	0.29822	1	1
1	TRANSFERASE ACTIVITY TRANSFERRING HEXOSYL GROUPS	1.3494e-19	0.30928	0.28125	1	1
1	REACTOME LIPID DIGESTION MOBILIZATION AND TRANSPORT	6.5386e-14	0.30918	0.2779	1	1
1	APOPTOSIS GO	4.0121e-20	0.30918	0.29317	1	1
1	REGULATION OF APOPTOSIS	1.9829e-20	0.30916	0.29465	1	1
1	MEMBRANE COAT	3.6097e-18	0.30898	0.25259	1	1
1	COATED MEMBRANE	3.6097e-18	0.30898	0.25259	1	1
1	KEGG PATHOGENIC ESCHERICHIA COLI INFECTION	4.756e-18	0.30848	0.31267	1	1
1	NEGATIVE REGULATION OF DNA METABOLIC PROCESS	6.7546e-07	0.30716	0.21941	1	1
1	PROTEIN TARGETING TO MEMBRANE	1.1075e-25	0.30701	0.31313	1	1
1	CELL PROLIFERATION GO 0008283	4.1935e-19	0.30607	0.29003	1	1
1	XENOBIOTIC METABOLIC PROCESS	1.9878e-15	0.30552	0.34295	1	1
1	CELLULAR PROTEIN COMPLEX ASSEMBLY	6.1699e-23	0.30437	0.28426	1	1
1	OXIDOREDUCTASE ACTIVITY ACTING ON THE ALDEHYDE OR OXO GROUP OF DONORSNAD OR NADP AS ACCEPTOR	1.1407e-07	0.30396	0.31067	1	1
1	NEGATIVE REGULATION OF CELLULAR PROTEIN METABOLIC PROCESS	3.1646e-15	0.30326	0.29992	1	1
1	BIOCARTA P27 PATHWAY	3.1877e-11	0.30309	0.2704	1	1
1	KEGG STARCH AND SUCROSE METABOLISM	3.9506e-21	0.30288	0.29439	1	1
1	BIOCARTA MCALPAIN PATHWAY	3.602e-15	0.30286	0.29086	1	1
1	PROTEIN HETERODIMERIZATION ACTIVITY	1.7102e-17	0.30229	0.25483	1	1
1	PID ARF6 TRAFFICKINGPATHWAY	4.382e-11	0.30182	0.27245	1	1
1	VESICLE COAT	1.9745e-17	0.30056	0.25493	1	1
1	REACTOME GLOBAL GENOMIC NER GG NER	5.6658e-11	0.29989	0.27592	1	1
1	PID MYC REPRESSPATHWAY	2.9254e-15	0.29979	0.3055	1	1
1	CALCIUM INDEPENDENT CELL CELL ADHESION	4.2404e-12	0.29942	0.31259	1	1
1	PID EPHRINBREVPATHWAY	6.002e-10	0.29906	0.22857	1	1
1	NEGATIVE REGULATION OF ANGIOGENESIS	5.2102e-08	0.29888	0.28046	1	1
1	KEGG GLYCOSPHINGOLIPID BIOSYNTHESIS GLOBO SERIES	3.3301e-10	0.29872	0.24841	1	1
1	KEGG ARACHIDONIC ACID METABOLISM	2.678e-12	0.29847	0.31487	1	1
1	GLYCOPROTEIN CATABOLIC PROCESS	5.739e-21	0.29819	0.32009	1	1
1	REACTOME ACTIVATION OF CHAPERONE GENES BY XBP1S	6.2527e-26	0.29799	0.30414	1	1
1	REACTOME PACKAGING OF TELOMERE ENDS	2.8116e-09	0.29798	0.28204	1	1
1	REACTOME P75NTR RECRUITS SIGNALLING COMPLEXES	5.0762e-12	0.29752	0.29044	1	1
1	MANNOSYLTRANSFERASE ACTIVITY	4.5958e-14	0.29679	0.25745	1	1
1	PEPTIDASE ACTIVITY	2.8458e-21	0.29668	0.31588	1	1
1	PID CD40 PATHWAY	5.7103e-15	0.2966	0.30438	1	1
1	REACTOME ACTIVATED TAK1 MEDIATES P38 MAPK ACTIVATION	1.3158e-15	0.29638	0.28057	1	1
1	TRANSITION METAL ION TRANSPORT	3.6407e-13	0.29629	0.30156	1	1
1	REACTOME CONVERSION FROM APC C CDC20 TO APC C CDH1 IN LATE ANAPHASE	8.4212e-09	0.29586	0.24555	1	1
1	KEGG RIBOFLAVIN METABOLISM	2.3465e-15	0.29428	0.27467	1	1
1	REACTOME SCFSKP2 MEDIATED DEGRADATION OF P27 P21	1.3728e-14	0.29327	0.25888	1	1
1	RESPONSE TO CHEMICAL STIMULUS	5.3419e-13	0.29262	0.28288	1	1
1	REGULATION OF RESPONSE TO STIMULUS	8.3875e-10	0.29105	0.26824	1	1
1	BIOCARTA LONGEVITY PATHWAY	3.6398e-12	0.29099	0.32268	1	1
1	REGULATION OF RHO PROTEIN SIGNAL TRANSDUCTION	3.5882e-13	0.29024	0.27468	1	1
1	REACTOME CD28 CO STIMULATION	2.7348e-11	0.28957	0.30625	1	1
1	CHEMICAL HOMEOSTASIS	2.2678e-11	0.289	0.31157	1	1
1	NEGATIVE REGULATION OF PROTEIN METABOLIC PROCESS	6.9958e-16	0.28886	0.29354	1	1
1	SEQUENCE SPECIFIC DNA BINDING	1.1199e-09	0.28865	0.23375	1	1
1	CELLULAR HOMEOSTASIS	1.4451e-10	0.28845	0.3064	1	1
1	BIOCARTA CERAMIDE PATHWAY	8.0822e-24	0.28718	0.27396	1	1
1	ANTI APOPTOSIS	2.2035e-17	0.28692	0.29445	1	1
1	BIOCARTA SRCRPTP PATHWAY	0.005894	0.28682	0.14031	1	1
1	PID HEDGEHOG 2PATHWAY	1.7472e-09	0.28679	0.29027	1	1
1	ENDOPEPTIDASE ACTIVITY	3.1842e-19	0.28659	0.28347	1	1
1	ST GAQ PATHWAY	1.6533e-17	0.28611	0.28994	1	1
1	POSITIVE REGULATION OF CELLULAR PROCESS	1.2861e-20	0.28577	0.27229	1	1
1	CENTROSOME	8.0174e-07	0.2851	0.21259	1	1
1	POSITIVE REGULATION OF BIOLOGICAL PROCESS	1.7274e-20	0.28437	0.27083	1	1
1	HYDROLASE ACTIVITY ACTING ON GLYCOSYL BONDS	1.8806e-19	0.28388	0.29723	1	1
1	REACTOME APC C CDH1 MEDIATED DEGRADATION OF CDC20 AND OTHER APC C CDH1 TARGETED PROTEINS IN LATE MITOSIS EARLY G1	2.7927e-12	0.28388	0.28072	1	1
1	ORGAN MORPHOGENESIS	2.8361e-19	0.28357	0.29686	1	1
1	MONOCARBOXYLIC ACID TRANSMEMBRANE TRANSPORTER ACTIVITY	3.5907e-09	0.28342	0.27795	1	1
1	REGULATION OF CELL MIGRATION	4.8548e-10	0.28259	0.25142	1	1
1	NUCLEAR BODY	3.6381e-16	0.28236	0.25197	1	1
1	REACTOME CHONDROITIN SULFATE DERMATAN SULFATE METABOLISM	7.1083e-17	0.28188	0.28051	1	1
1	APOPTOTIC PROGRAM	6.3525e-16	0.28134	0.24618	1	1
1	REACTOME CYCLIN E ASSOCIATED EVENTS DURING G1 S TRANSITION	2.4928e-13	0.28091	0.25266	1	1
1	REACTOME ASSEMBLY OF THE PRE REPLICATIVE COMPLEX	6.6317e-11	0.27958	0.27671	1	1
1	REACTOME METABOLISM OF STEROID HORMONES AND VITAMINS A AND D	3.6014e-09	0.27896	0.24513	1	1
1	REACTOME BASE EXCISION REPAIR	1.8792e-11	0.2788	0.2611	1	1
1	MICROTUBULE ORGANIZING CENTER	1.7207e-07	0.27618	0.21848	1	1
1	KEGG PANCREATIC CANCER	2.9212e-14	0.27616	0.24982	1	1
1	PROTEIN KINASE CASCADE	2.8604e-17	0.2759	0.25644	1	1
1	BEHAVIOR	1.779e-06	0.27569	0.2666	1	1
1	REACTOME APC C CDC20 MEDIATED DEGRADATION OF MITOTIC PROTEINS	1.1317e-11	0.27549	0.27409	1	1
1	VIRAL REPRODUCTIVE PROCESS	3.7067e-10	0.2754	0.28257	1	1
1	PID MYC ACTIVPATHWAY	7.5581e-11	0.27529	0.22298	1	1
1	KEGG GALACTOSE METABOLISM	4.8135e-20	0.27501	0.30084	1	1
1	DNA DAMAGE RESPONSESIGNAL TRANSDUCTION	1.4945e-16	0.27436	0.27118	1	1
1	PID FGF PATHWAY	6.5454e-11	0.27429	0.23271	1	1
1	NUCLEOTIDE METABOLIC PROCESS	1.4437e-17	0.27413	0.27059	1	1
1	CELL MIGRATION	3.1751e-14	0.27396	0.24618	1	1
1	DNA REPLICATION	5.6936e-09	0.27395	0.22657	1	1
1	KEGG FC EPSILON RI SIGNALING PATHWAY	3.6672e-13	0.27376	0.25543	1	1
1	MEIOSIS I	2.8318e-05	0.27284	0.17355	1	1
1	REACTOME GLUTATHIONE CONJUGATION	6.2923e-07	0.27174	0.28049	1	1
1	BIOCARTA RHO PATHWAY	3.5882e-13	0.27156	0.25974	1	1
1	CARBOHYDRATE BIOSYNTHETIC PROCESS	2.3825e-20	0.27154	0.27481	1	1
1	KEGG GLUTATHIONE METABOLISM	7.1665e-16	0.27151	0.29448	1	1
1	REACTOME SYNTHESIS OF GLYCOSYLPHOSPHATIDYLINOSITOL GPI	2.0383e-20	0.27148	0.24979	1	1
1	INTEGRAL TO GOLGI MEMBRANE	2.6085e-07	0.27039	0.25885	1	1
1	REGULATION OF CELL PROLIFERATION	2.0355e-15	0.26985	0.25326	1	1
1	CELL FATE COMMITMENT	3.6348e-08	0.26912	0.29291	1	1
1	KERATINOCYTE DIFFERENTIATION	3.0571e-09	0.26898	0.25753	1	1
1	PID IL2 PI3KPATHWAY	3.1888e-12	0.2675	0.28382	1	1
1	REACTOME GLYCEROPHOSPHOLIPID BIOSYNTHESIS	3.0182e-16	0.26695	0.25722	1	1
1	ST FAS SIGNALING PATHWAY	6.4174e-21	0.26692	0.23909	1	1
1	CELL CYCLE GO 0007049	7.0299e-09	0.26692	0.21888	1	1
1	REACTOME MEIOSIS	2.0953e-12	0.26629	0.26275	1	1
1	POSITIVE REGULATION OF DEVELOPMENTAL PROCESS	1.1861e-18	0.26624	0.26149	1	1
1	REACTOME SEMAPHORIN INTERACTIONS	2.7814e-13	0.2662	0.25991	1	1
1	DNA DEPENDENT DNA REPLICATION	3.5726e-06	0.26586	0.21832	1	1
1	KEGG N GLYCAN BIOSYNTHESIS	5.0963e-17	0.26585	0.24013	1	1
1	PROTEIN COMPLEX BINDING	4.9439e-15	0.26583	0.25352	1	1
1	MEIOTIC RECOMBINATION	2.4226e-05	0.26532	0.17799	1	1
1	REACTOME BIOSYNTHESIS OF THE N GLYCAN PRECURSOR DOLICHOL LIPID LINKED OLIGOSACCHARIDE LLO AND TRANSFER TO A NASCENT PROTEIN	2.3579e-23	0.26473	0.26923	1	1
1	MONOCARBOXYLIC ACID TRANSPORT	5.0735e-05	0.26412	0.298	1	1
1	REACTOME SIGNALING BY PDGF	8.1735e-11	0.26403	0.22307	1	1
1	BIOCARTA ACH PATHWAY	2.0955e-10	0.2638	0.22259	1	1
1	ENDODEOXYRIBONUCLEASE ACTIVITY	2.7124e-09	0.26363	0.22431	1	1
1	ANATOMICAL STRUCTURE MORPHOGENESIS	1.3884e-18	0.26234	0.26139	1	1
1	PHOSPHOLIPID TRANSPORTER ACTIVITY	5.6274e-08	0.26162	0.21449	1	1
1	REGULATION OF PHOSPHORYLATION	1.5303e-15	0.26148	0.274	1	1
1	REGULATION OF MEMBRANE POTENTIAL	7.6431e-06	0.26144	0.2238	1	1
1	ENDOPLASMIC RETICULUM PART	3.9761e-25	0.26141	0.2473	1	1
1	BIOCARTA TALL1 PATHWAY	6.1996e-12	0.26123	0.29335	1	1
1	NEGATIVE REGULATION OF CELLULAR BIOSYNTHETIC PROCESS	1.0531e-10	0.26081	0.25129	1	1
1	SA G1 AND S PHASES	6.8454e-05	0.2596	0.25949	1	1
1	PID S1P S1P3 PATHWAY	2.9671e-09	0.25908	0.19104	1	1
1	AGING	5.0523e-05	0.25907	0.23429	1	1
1	NOTCH SIGNALING PATHWAY	1.9785e-10	0.25903	0.24258	1	1
1	PROTEOGLYCAN BIOSYNTHETIC PROCESS	2.3209e-08	0.25882	0.25855	1	1
1	RECEPTOR SIGNALING PROTEIN ACTIVITY	8.9158e-12	0.25863	0.24241	1	1
1	SA TRKA RECEPTOR	1.846e-12	0.25834	0.26672	1	1
1	REACTOME PEPTIDE LIGAND BINDING RECEPTORS	0.0025906	0.25822	0.16444	1	1
1	MICROTUBULE ORGANIZING CENTER PART	4.688e-09	0.25788	0.25895	1	1
1	KEGG HISTIDINE METABOLISM	2.4694e-08	0.25779	0.30255	1	1
1	HEMATOPOIETIN INTERFERON CLASSD200 DOMAIN CYTOKINE RECEPTOR BINDING	7.783e-19	0.25757	0.2566	1	1
1	ACTIN FILAMENT BINDING	5.8544e-10	0.25638	0.2164	1	1
1	NEGATIVE REGULATION OF TRANSLATION	2.9112e-06	0.25564	0.19604	1	1
1	PROTEIN AMINO ACID LIPIDATION	6.3579e-21	0.25516	0.21715	1	1
1	REACTOME NRIF SIGNALS CELL DEATH FROM THE NUCLEUS	3.3611e-13	0.25511	0.22026	1	1
1	EPIDERMIS DEVELOPMENT	1.2986e-08	0.2551	0.24623	1	1
1	KEGG LINOLEIC ACID METABOLISM	2.3527e-14	0.25505	0.29558	1	1
1	INTERLEUKIN 2 PRODUCTION	9.6477e-06	0.25495	0.31016	1	1
1	HEART DEVELOPMENT	9.7839e-10	0.25494	0.22825	1	1
1	PID RHODOPSIN PATHWAY	2.5211e-06	0.25451	0.25891	1	1
1	FATTY ACID BIOSYNTHETIC PROCESS	9.1894e-11	0.2537	0.25512	1	1
1	PID RAC1 PATHWAY	6.9334e-17	0.25343	0.25598	1	1
1	REACTOME NFKB AND MAP KINASES ACTIVATION MEDIATED BY TLR4 SIGNALING REPERTOIRE	3.8344e-18	0.25342	0.26203	1	1
1	KEGG RIG I LIKE RECEPTOR SIGNALING PATHWAY	8.8277e-16	0.2532	0.24617	1	1
1	BASOLATERAL PLASMA MEMBRANE	6.8076e-11	0.25318	0.25792	1	1
1	OXIDOREDUCTASE ACTIVITY ACTING ON NADH OR NADPH	1.0865e-08	0.2529	0.2273	1	1
1	REACTOME YAP1 AND WWTR1 TAZ STIMULATED GENE EXPRESSION	5.297e-08	0.25208	0.2218	1	1
1	PID ARF6 PATHWAY	2.3245e-07	0.25167	0.24603	1	1
1	MICROSOME	2.1096e-18	0.25161	0.27596	1	1
1	REACTOME SEMA4D INDUCED CELL MIGRATION AND GROWTH CONE COLLAPSE	1.4386e-09	0.25134	0.23259	1	1
1	CONDENSED CHROMOSOME	2.9673e-06	0.2507	0.21374	1	1
1	KEGG REGULATION OF ACTIN CYTOSKELETON	2.5295e-13	0.25041	0.23352	1	1
1	SULFUR METABOLIC PROCESS	4.5344e-17	0.24993	0.26634	1	1
1	PID AR PATHWAY	3.3126e-13	0.24963	0.21407	1	1
1	REGULATION OF DEVELOPMENTAL PROCESS	2.6298e-17	0.24949	0.24018	1	1
1	KEGG DRUG METABOLISM OTHER ENZYMES	1.1059e-18	0.24917	0.26564	1	1
1	REACTOME ANTIVIRAL MECHANISM BY IFN STIMULATED GENES	6.1996e-12	0.24888	0.21181	1	1
1	POLYSACCHARIDE METABOLIC PROCESS	1.2261e-08	0.24881	0.28865	1	1
1	SECONDARY METABOLIC PROCESS	1.7975e-10	0.24748	0.27624	1	1
1	DAMAGED DNA BINDING	7.323e-09	0.24713	0.19061	1	1
1	HYDROLASE ACTIVITY HYDROLYZING O GLYCOSYL COMPOUNDS	3.3126e-13	0.24654	0.29144	1	1
1	LIPID TRANSPORTER ACTIVITY	3.3019e-12	0.24543	0.24097	1	1
1	KEGG RENIN ANGIOTENSIN SYSTEM	4.696e-06	0.24537	0.26569	1	1
1	NUCLEOTIDE SUGAR METABOLIC PROCESS	9.7066e-14	0.24524	0.25793	1	1
1	INTERPHASE OF MITOTIC CELL CYCLE	3.9087e-06	0.24414	0.1948	1	1
1	REACTOME SMAD2 SMAD3 SMAD4 HETEROTRIMER REGULATES TRANSCRIPTION	3.3145e-07	0.24412	0.19789	1	1
1	REACTOME P53 DEPENDENT G1 DNA DAMAGE RESPONSE	8.5178e-13	0.2434	0.22026	1	1
1	VIRAL REPRODUCTION	4.4196e-10	0.24272	0.25279	1	1
1	VESICULAR FRACTION	1.113e-15	0.24262	0.24475	1	1
1	AMINO ACID DERIVATIVE METABOLIC PROCESS	1.4642e-11	0.24179	0.24198	1	1
1	REACTOME TIGHT JUNCTION INTERACTIONS	1.1708e-11	0.24161	0.2326	1	1
1	REACTOME CDK MEDIATED PHOSPHORYLATION AND REMOVAL OF CDC6	2.0087e-12	0.24126	0.24158	1	1
1	PROTEIN IMPORT INTO NUCLEUS TRANSLOCATION	3.1963e-07	0.24053	0.24074	1	1
1	REGULATION OF MULTICELLULAR ORGANISMAL PROCESS	2.7173e-08	0.24043	0.24563	1	1
1	N ACETYLTRANSFERASE ACTIVITY	9.6522e-08	0.2404	0.18014	1	1
1	REACTOME SHC1 EVENTS IN EGFR SIGNALING	1.4361e-07	0.23991	0.2088	1	1
1	HOMEOSTATIC PROCESS	3.4152e-10	0.23937	0.25366	1	1
1	TRANSMEMBRANE RECEPTOR PROTEIN TYROSINE KINASE ACTIVITY	1.7026e-06	0.23932	0.19385	1	1
1	REACTOME CROSS PRESENTATION OF SOLUBLE EXOGENOUS ANTIGENS ENDOSOMES	4.9038e-12	0.23922	0.24738	1	1
1	BIOCARTA AKAP95 PATHWAY	6.6866e-07	0.23922	0.20671	1	1
1	SULFOTRANSFERASE ACTIVITY	6.7792e-12	0.23902	0.26264	1	1
1	REACTOME CDT1 ASSOCIATION WITH THE CDC6 ORC ORIGIN COMPLEX	5.3756e-11	0.23887	0.22988	1	1
1	N ACYLTRANSFERASE ACTIVITY	5.9324e-09	0.23837	0.203	1	1
1	ER NUCLEAR SIGNALING PATHWAY	2.6874e-12	0.23816	0.21131	1	1
1	KEGG PROTEIN EXPORT	2.8051e-16	0.23794	0.21277	1	1
1	PROTEIN TYROSINE KINASE ACTIVITY	9.3141e-10	0.23777	0.23566	1	1
1	REACTOME MEIOTIC SYNAPSIS	1.9146e-08	0.23774	0.20257	1	1
1	PROTEIN COMPLEX ASSEMBLY	2.8361e-19	0.2374	0.22902	1	1
1	CHROMOSOMAL PART	7.4331e-05	0.23725	0.18229	1	1
1	AMINOPEPTIDASE ACTIVITY	0.00060273	0.23648	0.18455	1	1
1	REACTOME DNA REPAIR	4.7788e-07	0.23642	0.18891	1	1
1	BIOCARTA EXTRINSIC PATHWAY	3.8709e-07	0.23611	0.31705	1	1
1	NUCLEOTIDYLTRANSFERASE ACTIVITY	3.0482e-10	0.23514	0.18271	1	1
1	NUCLEASE ACTIVITY	4.4593e-17	0.23497	0.23956	1	1
1	PID HIF2PATHWAY	2.7287e-09	0.23401	0.21058	1	1
1	REACTOME ACTIVATION OF CHAPERONES BY ATF6 ALPHA	2.1089e-10	0.23335	0.22052	1	1
1	CHROMOSOME	6.4338e-05	0.23326	0.17871	1	1
1	REACTOME INTEGRIN ALPHAIIB BETA3 SIGNALING	1.2426e-09	0.23316	0.22472	1	1
1	PID REG GR PATHWAY	8.8117e-10	0.23205	0.18568	1	1
1	REPLICATION FORK	6.5683e-05	0.23118	0.20955	1	1
1	REACTOME TRANSPORT OF VITAMINS NUCLEOSIDES AND RELATED MOLECULES	1.6752e-10	0.23066	0.21769	1	1
1	KEGG VALINE LEUCINE AND ISOLEUCINE BIOSYNTHESIS	8.4993e-12	0.23061	0.19726	1	1
1	REACTOME SYNTHESIS AND INTERCONVERSION OF NUCLEOTIDE DI AND TRIPHOSPHATES	5.6748e-10	0.23009	0.23494	1	1
1	NEGATIVE REGULATION OF DEVELOPMENTAL PROCESS	1.4361e-15	0.22987	0.24977	1	1
1	KEGG ARRHYTHMOGENIC RIGHT VENTRICULAR CARDIOMYOPATHY ARVC	0.00016797	0.22961	0.15922	1	1
1	REGULATION OF PROTEIN MODIFICATION PROCESS	6.2446e-15	0.22947	0.2027	1	1
1	ST P38 MAPK PATHWAY	6.053e-16	0.22926	0.23432	1	1
1	KEGG GLYCINE SERINE AND THREONINE METABOLISM	1.6313e-05	0.22917	0.18219	1	1
1	LIPOPROTEIN BIOSYNTHETIC PROCESS	1.3254e-19	0.22898	0.21546	1	1
1	NON MEMBRANE SPANNING PROTEIN TYROSINE KINASE ACTIVITY	2.1934e-08	0.22863	0.28654	1	1
1	DNA METABOLIC PROCESS	1.4832e-12	0.22831	0.22006	1	1
1	PID PDGFRBPATHWAY	1.9435e-11	0.22823	0.2046	1	1
1	DNA DIRECTED RNA POLYMERASEII CORE COMPLEX	8.1917e-15	0.22676	0.21456	1	1
1	REACTOME SPHINGOLIPID METABOLISM	1.6752e-10	0.22674	0.19372	1	1
1	REACTOME UNFOLDED PROTEIN RESPONSE	1.7945e-21	0.22658	0.25772	1	1
1	PID NFKAPPABATYPICALPATHWAY	4.3051e-05	0.22587	0.19355	1	1
1	LIPOPROTEIN METABOLIC PROCESS	3.329e-19	0.22553	0.21901	1	1
1	NUCLEOBASENUCLEOSIDE AND NUCLEOTIDE METABOLIC PROCESS	9.5177e-18	0.22511	0.22451	1	1
1	REACTOME HOST INTERACTIONS OF HIV FACTORS	5.8225e-15	0.22504	0.19098	1	1
1	PID KITPATHWAY	1.65e-14	0.225	0.25108	1	1
1	DEOXYRIBONUCLEASE ACTIVITY	6.61e-11	0.22466	0.18987	1	1
1	REACTOME ANDROGEN BIOSYNTHESIS	0.0013748	0.22423	0.1707	1	1
1	BIOCARTA RNA PATHWAY	1.695e-09	0.22364	0.2146	1	1
1	ORGAN DEVELOPMENT	1.3728e-14	0.22341	0.24671	1	1
1	REACTOME SIGNALING BY SCF KIT	6.3491e-13	0.22315	0.18929	1	1
1	REACTOME GLYCOSAMINOGLYCAN METABOLISM	2.5852e-10	0.22287	0.21115	1	1
1	REACTOME GAMMA CARBOXYLATION TRANSPORT AND AMINO TERMINAL CLEAVAGE OF PROTEINS	8.5152e-07	0.22282	0.23363	1	1
1	REACTOME DIABETES PATHWAYS	1.7901e-16	0.22227	0.22221	1	1
1	KEGG PEROXISOME	4.5445e-12	0.22226	0.20722	1	1
1	HYDROLASE ACTIVITY ACTING ON CARBON NITROGEN NOT PEPTIDEBONDSIN CYCLIC AMIDINES	1.2905e-07	0.2221	0.2551	1	1
1	REACTOME CTLA4 INHIBITORY SIGNALING	1.1469e-07	0.22202	0.19339	1	1
1	TRANSCRIPTION FACTOR ACTIVITY	7.0643e-12	0.22192	0.18692	1	1
1	REACTOME CLASS I MHC MEDIATED ANTIGEN PROCESSING PRESENTATION	5.0375e-20	0.22182	0.1901	1	1
1	TRANSFERASE ACTIVITY TRANSFERRING ACYL GROUPS	3.4246e-14	0.22167	0.18279	1	1
1	REGULATION OF HYDROLASE ACTIVITY	8.7349e-12	0.22147	0.23587	1	1
1	IDENTICAL PROTEIN BINDING	4.4755e-20	0.22147	0.19501	1	1
1	REACTOME MITOTIC G2 G2 M PHASES	0.00021887	0.22119	0.14475	1	1
1	RECEPTOR BINDING	3.2519e-11	0.21948	0.21227	1	1
1	POSITIVE REGULATION OF CELL ADHESION	6.3887e-07	0.21947	0.24865	1	1
1	CELL SUBSTRATE ADHESION	5.5966e-08	0.21928	0.2235	1	1
1	COPPER ION BINDING	1.5812e-10	0.21888	0.23096	1	1
1	INORGANIC ANION TRANSPORT	4.4531e-05	0.21875	0.31446	1	1
1	REACTOME P53 INDEPENDENT G1 S DNA DAMAGE CHECKPOINT	5.9323e-11	0.21874	0.21736	1	1
1	PROTEIN DIMERIZATION ACTIVITY	1.2489e-13	0.21815	0.17101	1	1
1	BIOCARTA GSK3 PATHWAY	4.3929e-09	0.21781	0.20844	1	1
1	OXIDOREDUCTASE ACTIVITY GO 0016705	6.4538e-07	0.21754	0.19194	1	1
1	SIGNAL SEQUENCE BINDING	1.9089e-17	0.21725	0.21952	1	1
1	BASAL LAMINA	1.3991e-08	0.21701	0.23504	1	1
1	POSITIVE REGULATION OF CELLULAR METABOLIC PROCESS	2.2562e-14	0.21692	0.19341	1	1
1	KEGG PATHWAYS IN CANCER	4.5271e-14	0.21627	0.19763	1	1
1	PID WNT NONCANONICAL PATHWAY	1.6608e-08	0.21403	0.20835	1	1
1	PID P38ALPHABETAPATHWAY	3.851e-07	0.21376	0.17404	1	1
1	BIOCARTA AHSP PATHWAY	0.024921	0.21368	0.23182	1	1
1	KEGG SULFUR METABOLISM	1.9719e-09	0.21331	0.26292	1	1
1	REACTOME RNA POL I TRANSCRIPTION	7.8088e-11	0.21329	0.24448	1	1
1	REACTOME REGULATION OF GLUCOKINASE BY GLUCOKINASE REGULATORY PROTEIN	5.8289e-09	0.21323	0.19816	1	1
1	REACTOME INCRETIN SYNTHESIS SECRETION AND INACTIVATION	3.4957e-08	0.21306	0.17792	1	1
1	CELLULAR CARBOHYDRATE METABOLIC PROCESS	1.8802e-16	0.21299	0.19104	1	1
1	REACTOME ABC FAMILY PROTEINS MEDIATED TRANSPORT	4.5289e-05	0.21299	0.17463	1	1
1	PID WNT SIGNALING PATHWAY	3.407e-06	0.21288	0.24879	1	1
1	KEGG PROSTATE CANCER	4.8442e-14	0.21285	0.19392	1	1
1	CARBOHYDRATE KINASE ACTIVITY	4.823e-08	0.21261	0.20652	1	1
1	PID CONE PATHWAY	2.1921e-06	0.21183	0.26053	1	1
1	REACTOME METABOLISM OF NUCLEOTIDES	6.172e-17	0.21172	0.21968	1	1
1	KEGG NUCLEOTIDE EXCISION REPAIR	3.1228e-12	0.21169	0.20333	1	1
1	BIOCARTA TPO PATHWAY	1.045e-06	0.21129	0.16853	1	1
1	HYDROLASE ACTIVITY ACTING ON ESTER BONDS	1.0074e-13	0.21128	0.22086	1	1
1	REACTOME STEROID HORMONES	7.2999e-06	0.21128	0.19978	1	1
1	EXTRACELLULAR STRUCTURE ORGANIZATION AND BIOGENESIS	1.5262e-05	0.21096	0.15782	1	1
1	BIOCARTA ETS PATHWAY	1.8229e-06	0.21054	0.18005	1	1
1	PID FASPATHWAY	2.2653e-09	0.21044	0.17284	1	1
1	PID ERBB1 DOWNSTREAM PATHWAY	1.8733e-13	0.20948	0.1923	1	1
1	BIOCARTA ARF PATHWAY	1.1458e-05	0.20888	0.15493	1	1
1	THIOLESTER HYDROLASE ACTIVITY	5.6588e-13	0.20844	0.25824	1	1
1	LIPOPROTEIN BINDING	0.00010337	0.20767	0.1717	1	1
1	REACTOME APOPTOSIS INDUCED DNA FRAGMENTATION	2.54e-08	0.20725	0.22938	1	1
1	TISSUE DEVELOPMENT	2.0201e-09	0.20718	0.22568	1	1
1	REACTOME P75NTR SIGNALS VIA NFKB	5.5777e-09	0.20709	0.2314	1	1
1	REACTOME POST TRANSLATIONAL PROTEIN MODIFICATION	1.3605e-17	0.20693	0.21698	1	1
1	BIOCARTA MET PATHWAY	6.166e-07	0.20657	0.18672	1	1
1	REACTOME PEROXISOMAL LIPID METABOLISM	9.5634e-14	0.20616	0.21466	1	1
1	POSITIVE REGULATION OF METABOLIC PROCESS	4.9176e-14	0.20582	0.18445	1	1
1	POSITIVE REGULATION OF CELL MIGRATION	0.0011544	0.20554	0.18271	1	1
1	MICROTUBULE CYTOSKELETON	5.7513e-05	0.20509	0.13804	1	1
1	REACTOME PHASE II CONJUGATION	3.1943e-13	0.20492	0.25568	1	1
1	PID TELOMERASEPATHWAY	3.5646e-12	0.2046	0.17108	1	1
1	CELL SURFACE	7.0442e-08	0.20437	0.1961	1	1
1	REACTOME VIF MEDIATED DEGRADATION OF APOBEC3G	6.9881e-11	0.20373	0.21251	1	1
1	DNA BINDING	6.5954e-12	0.20335	0.16803	1	1
1	ENDOSOME	7.0537e-10	0.20279	0.18418	1	1
1	GTP BINDING	5.4627e-14	0.2025	0.1848	1	1
1	ENDOPLASMIC RETICULUM MEMBRANE	7.9912e-19	0.20234	0.18675	1	1
1	PROTEIN IMPORT INTO NUCLEUS	1.9037e-08	0.20176	0.19248	1	1
1	REACTOME CS DS DEGRADATION	0.0035294	0.20145	0.086604	1	1
1	RESPONSE TO DRUG	3.1088e-08	0.2013	0.22345	1	1
1	REACTOME NFKB IS ACTIVATED AND SIGNALS SURVIVAL	1.8792e-05	0.2012	0.2021	1	1
1	PHOSPHOINOSITIDE MEDIATED SIGNALING	3.4215e-05	0.20078	0.19075	1	1
1	PID VEGFR1 2 PATHWAY	5.8272e-12	0.20025	0.19548	1	1
1	REACTOME FACTORS INVOLVED IN MEGAKARYOCYTE DEVELOPMENT AND PLATELET PRODUCTION	2.1718e-09	0.19994	0.16606	1	1
1	ENDONUCLEASE ACTIVITY	5.5452e-14	0.1999	0.18703	1	1
1	REACTOME PERK REGULATED GENE EXPRESSION	5.6079e-06	0.19974	0.17569	1	1
1	REACTOME APOPTOTIC EXECUTION PHASE	6.0375e-13	0.19945	0.20743	1	1
1	KEGG DRUG METABOLISM CYTOCHROME P450	1.5067e-07	0.19932	0.21502	1	1
1	TRANSFERASE ACTIVITY TRANSFERRING SULFUR CONTAINING GROUPS	6.0732e-09	0.19903	0.19283	1	1
1	REACTOME REGULATION OF ORNITHINE DECARBOXYLASE ODC	3.9562e-12	0.199	0.21107	1	1
1	MOTOR ACTIVITY	0.00023504	0.19849	0.1889	1	1
1	PHOSPHOINOSITIDE BIOSYNTHETIC PROCESS	9.9322e-18	0.19823	0.16788	1	1
1	BIOCARTA HCMV PATHWAY	9.6916e-06	0.19769	0.13284	1	1
1	KEGG PROTEASOME	1.2952e-10	0.19744	0.2114	1	1
1	GUANYL NUCLEOTIDE BINDING	1.0626e-12	0.19724	0.17699	1	1
1	KEGG PYRIMIDINE METABOLISM	1.3152e-13	0.19678	0.18862	1	1
1	NUCLEAR ENVELOPE ENDOPLASMIC RETICULUM NETWORK	4.7055e-19	0.19642	0.1736	1	1
1	BIOCARTA EPO PATHWAY	2.3775e-12	0.19617	0.23403	1	1
1	METALLOENDOPEPTIDASE ACTIVITY	4.5516e-09	0.19551	0.26225	1	1
1	REACTOME SYNTHESIS OF PE	6.4538e-07	0.19519	0.20933	1	1
1	CELLULAR CARBOHYDRATE CATABOLIC PROCESS	5.6287e-11	0.19451	0.20534	1	1
1	TRANSFERASE ACTIVITY TRANSFERRING GROUPS OTHER THAN AMINO ACYL GROUPS	1.6002e-14	0.19442	0.16928	1	1
1	CENTROSOME CYCLE	3.2129e-07	0.19424	0.20779	1	1
1	KEGG MATURITY ONSET DIABETES OF THE YOUNG	0.00022486	0.19322	0.15459	1	1
1	PID CXCR3PATHWAY	1.0096e-05	0.19293	0.1596	1	1
1	NEGATIVE REGULATION OF RESPONSE TO STIMULUS	5.2684e-05	0.19287	0.21654	1	1
1	REACTOME SCF BETA TRCP MEDIATED DEGRADATION OF EMI1	2.0427e-10	0.19271	0.20408	1	1
1	SMALL GTPASE MEDIATED SIGNAL TRANSDUCTION	3.5218e-11	0.19253	0.18704	1	1
1	KEGG BASE EXCISION REPAIR	5.5416e-07	0.19248	0.19429	1	1
1	TRANSFERASE ACTIVITY TRANSFERRING GLYCOSYL GROUPS	1.8677e-18	0.19213	0.1979	1	1
1	NEGATIVE REGULATION OF BIOLOGICAL PROCESS	7.0705e-15	0.19202	0.17956	1	1
1	CELL MATRIX ADHESION	4.3799e-07	0.19131	0.20027	1	1
1	ZINC ION BINDING	1.8196e-16	0.19073	0.19191	1	1
1	REACTOME DESTABILIZATION OF MRNA BY AUF1 HNRNP D0	3.8644e-11	0.19061	0.21144	1	1
1	PROTEIN LOCALIZATION	4.3449e-19	0.19051	0.16615	1	1
1	CELLULAR MACROMOLECULE CATABOLIC PROCESS	5.0957e-19	0.1905	0.18661	1	1
1	REACTOME SYNTHESIS OF PC	4.4938e-07	0.18999	0.15797	1	1
1	ESTABLISHMENT OF PROTEIN LOCALIZATION	1.4129e-18	0.18979	0.1746	1	1
1	REACTOME INTRINSIC PATHWAY FOR APOPTOSIS	1.4544e-11	0.18967	0.15792	1	1
1	REGULATION OF CELL CYCLE	1.5228e-07	0.18876	0.16043	1	1
1	REACTOME ALPHA LINOLENIC ACID ALA METABOLISM	0.00022227	0.1886	0.16331	1	1
1	CELL FRACTION	1.8009e-09	0.18855	0.16551	1	1
1	REACTOME NUCLEOTIDE EXCISION REPAIR	2.0488e-07	0.18813	0.17563	1	1
1	REACTOME TRANSCRIPTION COUPLED NER TC NER	6.1822e-06	0.18756	0.17132	1	1
1	KEGG ADHERENS JUNCTION	3.5246e-10	0.18743	0.16615	1	1
1	KEGG GLYCEROPHOSPHOLIPID METABOLISM	1.3139e-11	0.18737	0.1774	1	1
1	REACTOME TRAF6 MEDIATED INDUCTION OF NFKB AND MAP KINASES UPON TLR7 8 OR 9 ACTIVATION	3.6934e-14	0.18731	0.19308	1	1
1	OXIDOREDUCTASE ACTIVITY	1.6491e-12	0.18697	0.21492	1	1
1	BIOCARTA SALMONELLA PATHWAY	9.4572e-09	0.18638	0.19475	1	1
1	POSITIVE REGULATION OF TRANSCRIPTION FROM RNA POLYMERASE II PROMOTER	1.9017e-09	0.18631	0.15332	1	1
1	PID ERBB1 RECEPTOR PROXIMAL PATHWAY	3.9253e-09	0.18599	0.15441	1	1
1	ST ERK1 ERK2 MAPK PATHWAY	1.5586e-13	0.18597	0.2062	1	1
1	BIOCARTA ARAP PATHWAY	2.4034e-13	0.18558	0.19885	1	1
1	PEPTIDYL AMINO ACID MODIFICATION	3.9562e-12	0.18556	0.16896	1	1
1	REACTOME PLATELET AGGREGATION PLUG FORMATION	1.6453e-06	0.18552	0.17151	1	1
1	NITROGEN COMPOUND METABOLIC PROCESS	4.9826e-15	0.18523	0.19857	1	1
1	BIOCARTA SARS PATHWAY	8.788e-06	0.18507	0.19076	1	1
1	CELL CELL ADHESION	3.6122e-09	0.18465	0.19634	1	1
1	CYTOPLASMIC VESICLE MEMBRANE	5.291e-12	0.18453	0.18382	1	1
1	CYTOPLASMIC VESICLE PART	5.291e-12	0.18453	0.18382	1	1
1	REGULATION OF ENDOTHELIAL CELL PROLIFERATION	0.00012139	0.18449	0.15506	1	1
1	PID P38 MK2PATHWAY	3.3632e-09	0.18387	0.17439	1	1
1	NEGATIVE REGULATION OF CELLULAR PROCESS	1.9521e-14	0.18378	0.17493	1	1
1	POSITIVE REGULATION OF RNA METABOLIC PROCESS	1.1618e-09	0.18367	0.14415	1	1
1	POSITIVE REGULATION OF TRANSCRIPTIONDNA DEPENDENT	5.1679e-10	0.18353	0.1489	1	1
1	BIOCARTA ERK5 PATHWAY	3.8561e-09	0.18316	0.19867	1	1
1	KEGG FOLATE BIOSYNTHESIS	1.3453e-06	0.18292	0.14833	1	1
1	KEGG EPITHELIAL CELL SIGNALING IN HELICOBACTER PYLORI INFECTION	1.3519e-08	0.18264	0.15748	1	1
1	PID BETACATENIN NUC PATHWAY	1.9304e-11	0.1817	0.18802	1	1
1	KEGG PORPHYRIN AND CHLOROPHYLL METABOLISM	3.248e-14	0.18117	0.19774	1	1
1	KEGG GLYCOSYLPHOSPHATIDYLINOSITOL GPI ANCHOR BIOSYNTHESIS	1.0501e-11	0.18094	0.15037	1	1
1	G PROTEIN SIGNALING COUPLED TO IP3 SECOND MESSENGERPHOSPHOLIPASE C ACTIVATING	0.00034689	0.18053	0.1532	1	1
1	ST ADRENERGIC	9.081e-05	0.18029	0.1331	1	1
1	MONOOXYGENASE ACTIVITY	0.00082851	0.18003	0.18608	1	1
1	ECTODERM DEVELOPMENT	8.8192e-07	0.17886	0.18681	1	1
1	KEGG VEGF SIGNALING PATHWAY	3.1247e-11	0.17832	0.19346	1	1
1	APICAL JUNCTION COMPLEX	2.2334e-10	0.17809	0.17513	1	1
1	APICOLATERAL PLASMA MEMBRANE	2.2334e-10	0.17809	0.17513	1	1
1	RHO GUANYL NUCLEOTIDE EXCHANGE FACTOR ACTIVITY	2.2495e-05	0.17686	0.14982	1	1
1	TRANSMEMBRANE RECEPTOR PROTEIN KINASE ACTIVITY	0.0005386	0.17662	0.13066	1	1
1	RESPONSE TO DNA DAMAGE STIMULUS	8.4301e-08	0.17655	0.15724	1	1
1	RESPONSE TO ENDOGENOUS STIMULUS	9.7427e-11	0.17589	0.15481	1	1
1	ER TO GOLGI VESICLE MEDIATED TRANSPORT	3.8819e-16	0.17589	0.17547	1	1
1	TRNA METABOLIC PROCESS	2.0039e-10	0.17569	0.15866	1	1
1	CARBOHYDRATE CATABOLIC PROCESS	1.329e-10	0.17528	0.19475	1	1
1	REACTOME ACTIVATION OF GENES BY ATF4	0.00018451	0.17467	0.1579	1	1
1	ENDOTHELIAL CELL PROLIFERATION	9.1923e-05	0.17396	0.13478	1	1
1	REACTOME REGULATION OF GENE EXPRESSION IN BETA CELLS	0.0017349	0.17393	0.11428	1	1
1	BIOCARTA CHEMICAL PATHWAY	6.2905e-09	0.17367	0.12951	1	1
1	ENZYME BINDING	6.2515e-14	0.17274	0.15764	1	1
1	DNA REPAIR	1.9609e-06	0.17255	0.15653	1	1
1	KEGG GLYCOLYSIS GLUCONEOGENESIS	7.4581e-10	0.17245	0.2023	1	1
1	TIGHT JUNCTION	6.387e-10	0.17222	0.17801	1	1
1	MITOCHONDRION ORGANIZATION AND BIOGENESIS	4.2232e-08	0.17202	0.16766	1	1
1	POSITIVE REGULATION OF NUCLEOBASENUCLEOSIDENUCLEOTIDE AND NUCLEIC ACID METABOLIC PROCESS	6.7877e-09	0.17168	0.13305	1	1
1	INTRACELLULAR PROTEIN TRANSPORT	1.5582e-17	0.17134	0.16093	1	1
1	REACTOME METABOLISM OF CARBOHYDRATES	1.9576e-13	0.17116	0.1646	1	1
1	CELL JUNCTION	2.9719e-07	0.17015	0.15162	1	1
1	NUCLEAR REPLICATION FORK	0.00074485	0.16992	0.12845	1	1
1	GOLGI MEMBRANE	4.2649e-09	0.16981	0.13891	1	1
1	PID ATM PATHWAY	0.00026823	0.16964	0.13269	1	1
1	GLYCOPROTEIN METABOLIC PROCESS	8.3238e-09	0.16937	0.13804	1	1
1	REACTOME METABOLISM OF VITAMINS AND COFACTORS	1.7407e-14	0.16833	0.1608	1	1
1	PID HNF3APATHWAY	1.1979e-09	0.16782	0.19216	1	1
1	REACTOME AUTODEGRADATION OF THE E3 UBIQUITIN LIGASE COP1	2.6166e-09	0.16778	0.18189	1	1
1	NUCLEOTIDE BIOSYNTHETIC PROCESS	1.3654e-06	0.16763	0.19189	1	1
1	TRANSCRIPTION FROM RNA POLYMERASE II PROMOTER	2.0168e-10	0.16707	0.134	1	1
1	MICROTUBULE ORGANIZING CENTER ORGANIZATION AND BIOGENESIS	1.0194e-06	0.16671	0.20002	1	1
1	KEGG CHRONIC MYELOID LEUKEMIA	4.7157e-09	0.16669	0.15509	1	1
1	REGULATION OF CELL GROWTH	9.5547e-11	0.16655	0.1678	1	1
1	REACTOME AUTODEGRADATION OF CDH1 BY CDH1 APC C	1.6703e-08	0.16652	0.1724	1	1
1	MUSCLE DEVELOPMENT	1.5598e-08	0.16621	0.16934	1	1
1	REACTOME SYNTHESIS OF SUBSTRATES IN N GLYCAN BIOSYTHESIS	8.2276e-09	0.16576	0.18815	1	1
1	REACTOME GLUCOSE TRANSPORT	2.1073e-09	0.16551	0.14898	1	1
1	POSITIVE REGULATION OF TRANSCRIPTION	5.8977e-09	0.16481	0.13501	1	1
1	TRANS GOLGI NETWORK TRANSPORT VESICLE	0.00066431	0.16462	0.12259	1	1
1	REACTOME BIOLOGICAL OXIDATIONS	4.4024e-07	0.1642	0.21159	1	1
1	REACTOME TRANSCRIPTIONAL ACTIVITY OF SMAD2 SMAD3 SMAD4 HETEROTRIMER	0.00027864	0.16373	0.10841	1	1
1	PID FAK PATHWAY	2.8973e-06	0.16316	0.11097	1	1
1	TUBE MORPHOGENESIS	1.0298e-07	0.16263	0.19678	1	1
1	RAS GUANYL NUCLEOTIDE EXCHANGE FACTOR ACTIVITY	0.00029163	0.16244	0.11505	1	1
1	TRANSFERASE ACTIVITY TRANSFERRING PENTOSYL GROUPS	5.4665e-10	0.16242	0.16054	1	1
1	ISOMERASE ACTIVITY	5.0001e-11	0.16242	0.15109	1	1
1	REACTOME SIGNALING BY CONSTITUTIVELY ACTIVE EGFR	2.6579e-06	0.16227	0.13434	1	1
1	DOUBLE STRAND BREAK REPAIR	1.5744e-05	0.1622	0.12496	1	1
1	REACTOME ASPARAGINE N LINKED GLYCOSYLATION	2.2078e-11	0.16198	0.16737	1	1
1	TRANSITION METAL ION BINDING	3.9338e-17	0.16198	0.1868	1	1
1	BIOCARTA RACCYCD PATHWAY	4.688e-09	0.16149	0.15151	1	1
1	REACTOME PHOSPHOLIPID METABOLISM	6.1089e-09	0.16107	0.15086	1	1
1	INTRINSIC TO ENDOPLASMIC RETICULUM MEMBRANE	2.2789e-09	0.16092	0.14176	1	1
1	INTEGRAL TO ENDOPLASMIC RETICULUM MEMBRANE	2.2789e-09	0.16092	0.14176	1	1
1	DNA DIRECTED RNA POLYMERASE COMPLEX	6.0444e-14	0.16066	0.14924	1	1
1	RNA POLYMERASE COMPLEX	6.0444e-14	0.16066	0.14924	1	1
1	NUCLEAR DNA DIRECTED RNA POLYMERASE COMPLEX	6.0671e-14	0.16066	0.14924	1	1
1	REGULATION OF CYCLIN DEPENDENT PROTEIN KINASE ACTIVITY	0.00012139	0.16064	0.14668	1	1
1	REGULATION OF BIOLOGICAL QUALITY	3.4908e-07	0.1603	0.15552	1	1
1	PROTEIN AMINO ACID N LINKED GLYCOSYLATION	0.00018668	0.16022	0.12386	1	1
1	HEME METABOLIC PROCESS	1.1259e-06	0.16015	0.18031	1	1
1	ENDOPLASMIC RETICULUM	3.4095e-16	0.15986	0.15719	1	1
1	REACTOME TRANSPORT OF RIBONUCLEOPROTEINS INTO THE HOST NUCLEUS	0.00018961	0.15898	0.11382	1	1
1	RESPONSE TO HORMONE STIMULUS	2.9951e-05	0.15883	0.16359	1	1
1	PID SYNDECAN 3 PATHWAY	0.0053284	0.15795	0.066401	1	1
1	REACTOME PURINE RIBONUCLEOSIDE MONOPHOSPHATE BIOSYNTHESIS	2.7198e-10	0.15769	0.16864	1	1
1	REACTOME SIGNALING BY THE B CELL RECEPTOR BCR	1.0626e-12	0.15767	0.15184	1	1
1	UNFOLDED PROTEIN BINDING	1.3061e-08	0.15764	0.11899	1	1
1	AMINE METABOLIC PROCESS	2.7411e-13	0.15713	0.18032	1	1
1	MEIOTIC CELL CYCLE	0.00075554	0.157	0.12156	1	1
1	DNA DAMAGE RESPONSESIGNAL TRANSDUCTION BY P53 CLASS MEDIATOR	2.0234e-11	0.15687	0.18763	1	1
1	ELECTRON TRANSPORT GO 0006118	1.893e-08	0.15671	0.16672	1	1
1	HEME BIOSYNTHETIC PROCESS	6.8125e-06	0.15653	0.18888	1	1
1	BIOCARTA TFF PATHWAY	5.0024e-06	0.15603	0.12213	1	1
1	MACROMOLECULE LOCALIZATION	1.0064e-16	0.15551	0.13918	1	1
1	REACTOME METABOLISM OF LIPIDS AND LIPOPROTEINS	2.5925e-11	0.15464	0.14716	1	1
1	REACTOME RECRUITMENT OF NUMA TO MITOTIC CENTROSOMES	0.038087	0.15442	0.0955	1	1
1	BIOCARTA EGF PATHWAY	1.1407e-05	0.15419	0.14277	1	1
1	PID MAPKTRKPATHWAY	1.8709e-05	0.15367	0.12887	1	1
1	LOW DENSITY LIPOPROTEIN BINDING	0.0019816	0.15344	0.14901	1	1
1	NEUTRAL AMINO ACID TRANSMEMBRANE TRANSPORTER ACTIVITY	0.019147	0.15288	0.1457	1	1
1	NUCLEOBASENUCLEOSIDENUCLEOTIDE AND NUCLEIC ACID METABOLIC PROCESS	5.6298e-12	0.15282	0.12842	1	1
1	REACTOME MAP KINASE ACTIVATION IN TLR CASCADE	1.8928e-07	0.15184	0.12519	1	1
1	ATP BINDING	3.3618e-11	0.15181	0.12575	1	1
1	STEROID HORMONE RECEPTOR ACTIVITY	0.0010698	0.15074	0.13567	1	1
1	REACTOME BMAL1 CLOCK NPAS2 ACTIVATES CIRCADIAN EXPRESSION	5.0948e-05	0.15006	0.12797	1	1
1	PROTEIN HOMODIMERIZATION ACTIVITY	8.8039e-08	0.14919	0.12051	1	1
1	PROTEIN TRANSPORT	3.8645e-14	0.14884	0.13625	1	1
1	NUCLEOTIDE BINDING	1.6002e-14	0.14881	0.14677	1	1
1	REACTOME NEP NS2 INTERACTS WITH THE CELLULAR EXPORT MACHINERY	0.00018814	0.14824	0.11904	1	1
1	S PHASE	0.0055837	0.14809	0.11743	1	1
1	NEGATIVE REGULATION OF TRANSCRIPTION FROM RNA POLYMERASE II PROMOTER	4.0783e-06	0.14717	0.11353	1	1
1	PID CIRCADIANPATHWAY	7.0684e-06	0.14649	0.13843	1	1
1	PID IFNGPATHWAY	1.6753e-05	0.14526	0.15056	1	1
1	CENTROSOME ORGANIZATION AND BIOGENESIS	1.376e-07	0.14444	0.18513	1	1
1	REACTOME O LINKED GLYCOSYLATION OF MUCINS	0.0036649	0.14439	0.11275	1	1
1	INTEGRAL TO MEMBRANE	0.0097956	0.14435	0.090305	1	1
1	REACTOME FORMATION OF INCISION COMPLEX IN GG NER	7.1046e-07	0.14382	0.12675	1	1
1	PROTEIN EXPORT FROM NUCLEUS	0.011631	0.14354	0.052616	1	1
1	SECRETORY GRANULE	0.00029385	0.1432	0.12648	1	1
1	REACTOME MITOCHONDRIAL TRNA AMINOACYLATION	7.1125e-09	0.14312	0.12565	1	1
1	RESPONSE TO OXIDATIVE STRESS	3.6409e-06	0.14215	0.15188	1	1
1	REACTOME SLBP DEPENDENT PROCESSING OF REPLICATION DEPENDENT HISTONE PRE MRNAS	0.0016116	0.14208	0.11269	1	1
1	REACTOME HIV INFECTION	4.382e-11	0.14192	0.12127	1	1
1	ADENYL NUCLEOTIDE BINDING	5.1335e-11	0.1419	0.11987	1	1
1	MEMBRANE FUSION	2.0684e-06	0.14125	0.16698	1	1
1	ACETYLTRANSFERASE ACTIVITY	8.5701e-06	0.14122	0.12241	1	1
1	INTRINSIC TO GOLGI MEMBRANE	0.00015961	0.14061	0.10859	1	1
1	BIOCARTA AKAP13 PATHWAY	0.00053274	0.14044	0.12205	1	1
1	REGULATION OF GROWTH	8.6442e-07	0.14021	0.12232	1	1
1	INTRINSIC TO ORGANELLE MEMBRANE	8.2845e-10	0.13974	0.10861	1	1
1	PROTEIN TARGETING	2.9824e-11	0.13968	0.13436	1	1
1	MEMBRANE	0.0031901	0.13963	0.089716	1	1
1	INTEGRAL TO ORGANELLE MEMBRANE	1.6746e-09	0.139	0.10921	1	1
1	OXIDOREDUCTASE ACTIVITY ACTING ON CH OH GROUP OF DONORS	2.2593e-05	0.13884	0.13343	1	1
1	LIPID BIOSYNTHETIC PROCESS	9.0119e-11	0.13883	0.1422	1	1
1	ACTIVATION OF NF KAPPAB TRANSCRIPTION FACTOR	0.0095478	0.13874	0.11172	1	1
1	PROTEIN METABOLIC PROCESS	1.0855e-12	0.13812	0.12609	1	1
1	TRNA PROCESSING	6.2905e-09	0.13796	0.16126	1	1
1	REGULATION OF TRANSCRIPTION FROM RNA POLYMERASE II PROMOTER	7.0299e-09	0.13759	0.12147	1	1
1	REACTOME SIGNALING BY TGF BETA RECEPTOR COMPLEX	6.4212e-07	0.13718	0.12056	1	1
1	REGULATION OF CELLULAR METABOLIC PROCESS	2.5581e-11	0.13561	0.12308	1	1
1	INTRINSIC TO MEMBRANE	0.01624	0.13546	0.082964	1	1
1	GOLGI APPARATUS	2.0447e-09	0.13533	0.11159	1	1
1	REGULATION OF METABOLIC PROCESS	2.0646e-11	0.13528	0.12206	1	1
1	PORE COMPLEX	1.6213e-06	0.13517	0.10834	1	1
1	PID INSULIN PATHWAY	1.4016e-12	0.135	0.1322	1	1
1	MACROMOLECULAR COMPLEX DISASSEMBLY	6.0708e-05	0.13495	0.098352	1	1
1	REACTOME NUCLEAR RECEPTOR TRANSCRIPTION PATHWAY	7.8082e-05	0.13469	0.1226	1	1
1	RESPONSE TO IONIZING RADIATION	0.00037525	0.13452	0.079919	1	1
1	KEGG ONE CARBON POOL BY FOLATE	6.9978e-07	0.13449	0.16467	1	1
1	REACTOME PHASE1 FUNCTIONALIZATION OF COMPOUNDS	0.0019234	0.13369	0.16623	1	1
1	REACTOME RESOLUTION OF AP SITES VIA THE SINGLE NUCLEOTIDE REPLACEMENT PATHWAY	0.00015104	0.13273	0.12017	1	1
1	PURINE NUCLEOTIDE BINDING	1.515e-12	0.13265	0.1323	1	1
1	BIOCARTA EIF2 PATHWAY	1.6679e-05	0.13246	0.1098	1	1
1	BIOPOLYMER METABOLIC PROCESS	2.4249e-11	0.13231	0.10763	1	1
1	GLYCOPROTEIN BIOSYNTHETIC PROCESS	7.1011e-06	0.13225	0.11161	1	1
1	LIPID METABOLIC PROCESS	2.7341e-07	0.13216	0.13537	1	1
1	TRANSCRIPTION	1.2191e-08	0.13136	0.10401	1	1
1	REACTOME BASE FREE SUGAR PHOSPHATE REMOVAL VIA THE SINGLE NUCLEOTIDE REPLACEMENT PATHWAY	0.000696	0.13066	0.12848	1	1
1	MEMBRANE FRACTION	8.7545e-05	0.13022	0.10919	1	1
1	PROTEIN COMPLEX DISASSEMBLY	4.1354e-05	0.13022	0.10638	1	1
1	REACTOME CELL JUNCTION ORGANIZATION	1.5955e-05	0.13001	0.12677	1	1
1	BIOCARTA PROTEASOME PATHWAY	5.2102e-08	0.1299	0.1609	1	1
1	REACTOME RNA POL I TRANSCRIPTION TERMINATION	0.00019637	0.12967	0.10908	1	1
1	CYTOSKELETON	6.2109e-06	0.12875	0.11242	1	1
1	RNA POLYMERASE ACTIVITY	6.3019e-05	0.12859	0.135	1	1
1	REACTOME PPARA ACTIVATES GENE EXPRESSION	2.6806e-11	0.12841	0.12421	1	1
1	BIOCARTA ACTINY PATHWAY	5.7271e-09	0.12829	0.1466	1	1
1	PHOSPHORIC MONOESTER HYDROLASE ACTIVITY	4.1266e-05	0.12764	0.10487	1	1
1	PID TGFBRPATHWAY	3.1538e-05	0.12748	0.092411	1	1
1	REACTOME RNA POL I RNA POL III AND MITOCHONDRIAL TRANSCRIPTION	4.0861e-07	0.12743	0.13626	1	1
1	PLASMA MEMBRANE	0.042378	0.12666	0.07598	1	1
1	ENDONUCLEASE ACTIVITY GO 0016893	0.0014516	0.12662	0.10978	1	1
1	REGULATION OF GENE EXPRESSION	2.4202e-09	0.126	0.11115	1	1
1	ALCOHOL METABOLIC PROCESS	2.1444e-08	0.12585	0.13281	1	1
1	SIGNAL TRANSDUCTION	0.00064548	0.12522	0.10068	1	1
1	REGULATION OF NUCLEOBASENUCLEOSIDENUCLEOTIDE AND NUCLEIC ACID METABOLIC PROCESS	9.6522e-08	0.12513	0.098596	1	1
1	TRANSPORT VESICLE	0.0023966	0.1241	0.08516	1	1
1	SINGLE STRANDED DNA BINDING	1.2258e-05	0.1241	0.12749	1	1
1	NEGATIVE REGULATION OF CELLULAR METABOLIC PROCESS	4.419e-09	0.12331	0.11436	1	1
1	ADENYL RIBONUCLEOTIDE BINDING	9.966e-10	0.12286	0.11153	1	1
1	CATION BINDING	1.1485e-06	0.12268	0.12591	1	1
1	CARBOHYDRATE TRANSMEMBRANE TRANSPORTER ACTIVITY	2.9951e-05	0.12216	0.1537	1	1
1	CELLULAR MACROMOLECULE METABOLIC PROCESS	1.1164e-11	0.12204	0.11483	1	1
1	PROTEIN FOLDING	1.1684e-13	0.12156	0.12074	1	1
1	GENERATION OF PRECURSOR METABOLITES AND ENERGY	8.8998e-08	0.12118	0.11744	1	1
1	NEGATIVE REGULATION OF METABOLIC PROCESS	7.9918e-09	0.12095	0.10978	1	1
1	KEGG GLYCOSAMINOGLYCAN BIOSYNTHESIS CHONDROITIN SULFATE	0.0001107	0.12088	0.10447	1	1
1	ST GA13 PATHWAY	9.8933e-07	0.12076	0.10335	1	1
1	GTPASE ACTIVATOR ACTIVITY	0.02244	0.12068	0.07375	1	1
1	MEMBRANE PART	0.011894	0.11958	0.0785	1	1
1	PURINE RIBONUCLEOTIDE BINDING	1.9175e-11	0.11938	0.12602	1	1
1	CELLULAR PROTEIN METABOLIC PROCESS	5.3403e-11	0.11931	0.11036	1	1
1	REACTOME FORMATION OF TUBULIN FOLDING INTERMEDIATES BY CCT TRIC	0.00016633	0.11898	0.12457	1	1
1	NUCLEAR MATRIX	0.035564	0.11804	0.065056	1	1
1	RNA METABOLIC PROCESS	6.3842e-08	0.11762	0.098602	1	1
1	REACTOME BRANCHED CHAIN AMINO ACID CATABOLISM	0.0011867	0.11735	0.1062	1	1
1	NUCLEAR TRANSPORT	0.00011804	0.11659	0.084376	1	1
1	ENDOMEMBRANE SYSTEM	9.4926e-14	0.11658	0.10877	1	1
1	GLUCOSE METABOLIC PROCESS	3.4215e-05	0.11651	0.12279	1	1
1	BIOCARTA NFAT PATHWAY	0.0036649	0.11526	0.090585	1	1
1	MACROMOLECULAR COMPLEX ASSEMBLY	1.6987e-11	0.11469	0.097339	1	1
1	REACTOME TRANSPORT OF MATURE MRNA DERIVED FROM AN INTRONLESS TRANSCRIPT	0.00089217	0.11403	0.09591	1	1
1	SECRETION	0.00060056	0.11308	0.10317	1	1
1	PROTEASOME COMPLEX	2.0727e-08	0.1122	0.14539	1	1
1	INTEGRAL TO PLASMA MEMBRANE	0.046855	0.1117	0.078577	1	1
1	BASE EXCISION REPAIR	4.8649e-05	0.11152	0.12086	1	1
1	BIOCARTA CDC42RAC PATHWAY	2.1066e-05	0.11149	0.12655	1	1
1	BIOCARTA NGF PATHWAY	6.1982e-05	0.11134	0.15471	1	1
1	INTERCELLULAR JUNCTION	0.00031934	0.11042	0.11017	1	1
1	REACTOME CHONDROITIN SULFATE BIOSYNTHESIS	0.013431	0.11	0.072712	1	1
1	PHOSPHORIC ESTER HYDROLASE ACTIVITY	0.0029272	0.10995	0.096065	1	1
1	UBIQUITIN LIGASE COMPLEX	0.00020139	0.10975	0.078373	1	1
1	VESICLE MEMBRANE	7.7847e-06	0.10958	0.11605	1	1
1	CELLULAR LIPID METABOLIC PROCESS	1.7109e-06	0.10939	0.12143	1	1
1	PID P38 MKK3 6PATHWAY	1.3112e-05	0.10862	0.082408	1	1
1	REGULATION OF CELL DIFFERENTIATION	0.0042819	0.10806	0.096038	1	1
1	HETEROPHILIC CELL ADHESION	0.030603	0.10692	0.11318	1	1
1	SOLUTE SODIUM SYMPORTER ACTIVITY	0.00089217	0.10685	0.10422	1	1
1	KEGG PENTOSE AND GLUCURONATE INTERCONVERSIONS	5.5779e-13	0.10682	0.13999	1	1
1	HETEROCYCLE METABOLIC PROCESS	4.5289e-05	0.10671	0.11577	1	1
1	REGULATION OF TRANSCRIPTION	2.5679e-07	0.10642	0.093362	1	1
1	REACTOME ADP SIGNALLING THROUGH P2RY1	0.0016116	0.10574	0.10382	1	1
1	GLYCEROPHOSPHOLIPID BIOSYNTHETIC PROCESS	1.3674e-08	0.10545	0.11198	1	1
1	REACTOME INHIBITION OF REPLICATION INITIATION OF DAMAGED DNA BY RB1 E2F1	0.016503	0.10535	0.099631	1	1
1	ST JNK MAPK PATHWAY	0.0014914	0.10487	0.086667	1	1
1	RNA BIOSYNTHETIC PROCESS	1.2699e-07	0.10481	0.10019	1	1
1	REACTOME FATTY ACID TRIACYLGLYCEROL AND KETONE BODY METABOLISM	2.4368e-07	0.1047	0.092795	1	1
1	TRANSCRIPTION DNA DEPENDENT	1.1718e-07	0.10438	0.10011	1	1
1	REACTOME METABOLISM OF NON CODING RNA	0.00014867	0.10409	0.1128	1	1
1	TRANSCRIPTION ACTIVATOR ACTIVITY	6.0438e-08	0.1025	0.090915	1	1
1	FEMALE PREGNANCY	0.0011347	0.10239	0.1028	1	1
1	REGULATION OF TRANSCRIPTIONDNA DEPENDENT	8.8192e-07	0.10208	0.09441	1	1
1	BIOCARTA PITX2 PATHWAY	0.0022379	0.10207	0.1523	1	1
1	PID ARF 3PATHWAY	6.7751e-10	0.10177	0.11019	1	1
1	REGULATION OF RNA METABOLIC PROCESS	1.5363e-06	0.10159	0.091507	1	1
1	PID HNF3BPATHWAY	3.7424e-05	0.10121	0.15757	1	1
1	PID FOXOPATHWAY	8.862e-05	0.10083	0.065641	1	1
1	REACTOME GLUCURONIDATION	2.4885e-10	0.10029	0.16347	1	1
1	REACTOME THROMBIN SIGNALLING THROUGH PROTEINASE ACTIVATED RECEPTORS PARS	0.00057294	0.099928	0.10363	1	1
1	DOUBLE STRANDED DNA BINDING	0.00028833	0.099355	0.095255	1	1
1	INTRINSIC TO PLASMA MEMBRANE	0.074648	0.099136	0.069483	1	1
1	KEGG RETINOL METABOLISM	0.00011946	0.099014	0.1467	1	1
1	B CELL DIFFERENTIATION	0.0051693	0.098925	0.12441	1	1
1	NEGATIVE REGULATION OF GROWTH	0.003847	0.098829	0.070342	1	1
1	ANION TRANSPORT	0.06028	0.098668	0.10388	1	1
1	PROTEIN SERINE THREONINE PHOSPHATASE ACTIVITY	1.9435e-07	0.098359	0.10459	1	1
1	OXYGEN AND REACTIVE OXYGEN SPECIES METABOLIC PROCESS	0.0020013	0.098348	0.14865	1	1
1	PROTEIN KINASE ACTIVITY	7.6185e-05	0.098136	0.072805	1	1
1	ORGANELLE MEMBRANE	1.545e-17	0.097927	0.095531	1	1
1	POSITIVE REGULATION OF TRANSCRIPTION FACTOR ACTIVITY	0.0212	0.097129	0.094171	1	1
1	CELLULAR COMPONENT ASSEMBLY	8.3724e-09	0.096621	0.081701	1	1
1	REACTOME INTERACTIONS OF VPR WITH HOST CELLULAR PROTEINS	0.0037111	0.096511	0.068661	1	1
1	GOLGI APPARATUS PART	4.9027e-07	0.093547	0.074597	1	1
1	CYTOSKELETAL PROTEIN BINDING	0.00060056	0.093344	0.066384	1	1
1	DNA PACKAGING	0.021365	0.091669	0.069647	1	1
1	WNT SIGNALING	0.00061817	0.09161	0.086283	1	1
1	TRANSCRIPTION COREPRESSOR ACTIVITY	2.5701e-06	0.09131	0.10189	1	1
1	BIOCARTA VEGF PATHWAY	0.00093382	0.090816	0.090231	1	1
1	ORGANELLE PART	1.3542e-07	0.090475	0.071262	1	1
1	PHOSPHOLIPID BIOSYNTHETIC PROCESS	3.5153e-08	0.090019	0.097689	1	1
1	SENSORY PERCEPTION OF CHEMICAL STIMULUS	0.014148	0.088955	0.076259	1	1
1	REACTOME CYTOCHROME P450 ARRANGED BY SUBSTRATE TYPE	0.037633	0.088686	0.10774	1	1
1	CARBOHYDRATE METABOLIC PROCESS	1.1458e-05	0.088387	0.07998	1	1
1	INTRACELLULAR ORGANELLE PART	2.6775e-07	0.088218	0.069418	1	1
1	KEGG RENAL CELL CARCINOMA	0.0016666	0.088118	0.070901	1	1
1	NUCLEAR PORE	0.014148	0.087703	0.045073	1	1
1	REACTOME EGFR DOWNREGULATION	0.0023656	0.087608	0.049602	1	1
1	CHROMATIN	0.063989	0.087141	0.061414	1	1
1	PLASMA MEMBRANE PART	0.062732	0.086983	0.070358	1	1
1	BIOPOLYMER MODIFICATION	1.0327e-05	0.086586	0.080543	1	1
1	NUCLEUS	9.6916e-06	0.085163	0.067251	1	1
1	PID NCADHERINPATHWAY	0.0018239	0.083241	0.057631	1	1
1	DNA HELICASE ACTIVITY	0.04578	0.083182	0.051482	1	1
1	BIOCARTA ALK PATHWAY	0.012127	0.083074	0.065155	1	1
1	REACTOME CELL CELL COMMUNICATION	0.0045962	0.082681	0.074484	1	1
1	TRANSFERASE ACTIVITY TRANSFERRING PHOSPHORUS CONTAINING GROUPS	4.8649e-05	0.08221	0.065418	1	1
1	ATPASE ACTIVITY COUPLED	5.7513e-05	0.082149	0.067046	1	1
1	ION BINDING	4.5098e-05	0.081391	0.094647	1	1
1	NON MEMBRANE BOUND ORGANELLE	5.4934e-05	0.081111	0.071361	1	1
1	INTRACELLULAR NON MEMBRANE BOUND ORGANELLE	5.4934e-05	0.081111	0.071361	1	1
1	CYTOPLASM	1.3036e-10	0.079125	0.087214	1	1
1	REACTOME REGULATION OF BETA CELL DEVELOPMENT	0.027498	0.07903	0.077968	1	1
1	MITOCHONDRIAL TRANSPORT	0.00029385	0.078842	0.088715	1	1
1	PROTEIN C TERMINUS BINDING	0.0055334	0.07834	0.049004	1	1
1	KEGG MELANOMA	0.0069202	0.076833	0.065802	1	1
1	ANATOMICAL STRUCTURE DEVELOPMENT	0.004827	0.075696	0.065029	1	1
1	KEGG VALINE LEUCINE AND ISOLEUCINE DEGRADATION	0.0018118	0.075659	0.097515	1	1
1	REACTOME TRANSCRIPTION	0.00069228	0.074529	0.070993	1	1
1	REACTOME G1 PHASE	0.012607	0.074199	0.10763	1	1
1	MULTICELLULAR ORGANISMAL DEVELOPMENT	0.0050683	0.07414	0.061958	1	1
1	TRANSCRIPTION REPRESSOR ACTIVITY	0.0002266	0.073614	0.066644	1	1
1	PID ERBB2ERBB3PATHWAY	0.0047393	0.073578	0.056523	1	1
1	REACTOME PROTEIN FOLDING	0.00046181	0.073404	0.076728	1	1
1	PHOSPHOTRANSFERASE ACTIVITY ALCOHOL GROUP AS ACCEPTOR	0.0021305	0.072959	0.05274	1	1
1	LIGASE ACTIVITY FORMING CARBON NITROGEN BONDS	2.1605e-06	0.072778	0.058394	1	1
1	CELLULAR PROTEIN CATABOLIC PROCESS	1.4307e-06	0.072583	0.067	1	1
1	CELLULAR PROTEIN COMPLEX DISASSEMBLY	0.0045123	0.072538	0.062787	1	1
1	MICROBODY	0.00055653	0.072122	0.086802	1	1
1	PEROXISOME	0.00055653	0.072122	0.086802	1	1
1	REACTOME ACTIVATED AMPK STIMULATES FATTY ACID OXIDATION IN MUSCLE	0.0024919	0.070417	0.078611	1	1
1	ATPASE ACTIVITY	5.2245e-05	0.070027	0.062161	1	1
1	INTRA GOLGI VESICLE MEDIATED TRANSPORT	3.6169e-05	0.068487	0.052864	1	1
1	REACTOME TRANSPORT OF MATURE TRANSCRIPT TO CYTOPLASM	0.0059472	0.067969	0.071987	1	1
1	NUCLEAR ENVELOPE	0.026348	0.067765	0.034921	1	1
1	KINASE ACTIVITY	0.0091211	0.067296	0.042859	1	1
1	CYTOPLASMIC PART	1.4844e-06	0.066	0.063738	1	1
1	PROTEIN SERINE THREONINE KINASE ACTIVITY	0.015767	0.065993	0.029301	1	1
1	TRANSCRIPTION FROM RNA POLYMERASE III PROMOTER	0.00097046	0.065845	0.060079	1	1
1	PROTEIN AMINO ACID PHOSPHORYLATION	0.020926	0.062959	0.044209	1	1
1	TRANSCRIPTION COFACTOR ACTIVITY	6.5142e-05	0.062616	0.05504	1	1
1	NUCLEAR MEMBRANE PART	0.0035629	0.061858	0.060803	1	1
1	KEGG UBIQUITIN MEDIATED PROTEOLYSIS	0.0023579	0.061018	0.038659	1	1
1	TRANSFERASE ACTIVITY TRANSFERRING ONE CARBON GROUPS	0.030907	0.060973	0.065938	1	1
1	ACID AMINO ACID LIGASE ACTIVITY	7.6783e-06	0.060601	0.055773	1	1
1	NUCLEOTIDE EXCISION REPAIR	0.016996	0.058212	0.041147	1	1
1	PIGMENT METABOLIC PROCESS	0.032503	0.058181	0.097131	1	1
1	ORGANELLE ORGANIZATION AND BIOGENESIS	0.00090798	0.056928	0.038205	1	1
1	PHOSPHOINOSITIDE METABOLIC PROCESS	0.0041708	0.055284	0.051611	1	1
1	EARLY ENDOSOME	0.026615	0.051964	0.031681	1	1
1	PROTEIN POLYUBIQUITINATION	0.018575	0.047377	0.032747	1	1
1	SMALL CONJUGATING PROTEIN LIGASE ACTIVITY	0.00092082	0.046729	0.039528	1	1
1	REACTOME TRNA AMINOACYLATION	0.011359	0.045612	0.045024	1	1
1	PIGMENT BIOSYNTHETIC PROCESS	0.052554	0.044774	0.097285	1	1
1	PROTEIN COMPLEX	0.015142	0.043083	0.032509	1	1
1	NUCLEAR PART	0.054127	0.042296	0.035303	1	1
1	KEGG AMINOACYL TRNA BIOSYNTHESIS	0.027498	0.042223	0.035394	1	1
1	SMALL PROTEIN CONJUGATING ENZYME ACTIVITY	0.013616	0.04221	0.028439	1	1
1	UBIQUITIN PROTEIN LIGASE ACTIVITY	0.0016444	0.040368	0.035511	1	1
1	ENVELOPE	0.022672	0.03429	0.027823	1	1
1	ORGANELLE ENVELOPE	0.022672	0.03429	0.027823	1	1
1	MACROMOLECULAR COMPLEX	0.02993	0.030378	0.022989	1	1
1	LIGASE ACTIVITY	0.014186	0.026925	0.025069	1	1
2	SPECIFIC TRANSCRIPTIONAL REPRESSOR ACTIVITY	6.8843e-16	0.36322	0.34679	1	1
2	REACTOME UNWINDING OF DNA	0.018067	0.3435	0.21712	1	1
2	TELOMERIC DNA BINDING	2.2563e-08	0.3031	0.23416	1	1
2	S PHASE OF MITOTIC CELL CYCLE	1.0794e-09	0.2853	0.30298	1	1
2	REACTOME ACTIVATION OF THE PRE REPLICATIVE COMPLEX	0.010078	0.24234	0.21045	1	1
2	REACTOME MRNA DECAY BY 3 TO 5 EXORIBONUCLEASE	1.7451e-11	0.23867	0.21715	1	1
2	SPINDLE MICROTUBULE	0.00165	0.23657	0.25213	1	1
2	RIBOSOME BIOGENESIS AND ASSEMBLY	1.1655e-12	0.23224	0.23558	1	1
2	RRNA PROCESSING	8.3875e-10	0.22755	0.21358	1	1
2	EUKARYOTIC TRANSLATION INITIATION FACTOR 3 COMPLEX	7.0976e-10	0.22642	0.24547	1	1
2	HISTONE ACETYLTRANSFERASE ACTIVITY	9.2254e-07	0.22407	0.24252	1	1
2	BIOCARTA PTC1 PATHWAY	0.00014121	0.22204	0.27452	1	1
2	ATP DEPENDENT DNA HELICASE ACTIVITY	1.6031e-12	0.21763	0.24029	1	1
2	DNA HELICASE ACTIVITY	4.1289e-11	0.20462	0.20344	1	1
2	BIOCARTA RB PATHWAY	0.0024438	0.2028	0.20893	1	1
2	REACTOME ACTIVATION OF ATR IN RESPONSE TO REPLICATION STRESS	0.0095071	0.1977	0.1731	1	1
2	PID ALK2PATHWAY	3.4569e-08	0.19657	0.22487	1	1
2	N TERMINAL PROTEIN AMINO ACID MODIFICATION	7.9868e-13	0.19203	0.1865	1	1
2	CHROMATIN REMODELING COMPLEX	1.1914e-08	0.19078	0.21722	1	1
2	PROTEIN EXPORT FROM NUCLEUS	7.5386e-06	0.19045	0.15892	1	1
2	DNA REPLICATION INITIATION	0.0064076	0.1903	0.1667	1	1
2	BIOCARTA TEL PATHWAY	4.1952e-06	0.18978	0.17366	1	1
2	SA G1 AND S PHASES	0.0013197	0.18686	0.14696	1	1
2	RRNA METABOLIC PROCESS	2.9319e-09	0.18506	0.18485	1	1
2	RNA POLYMERASE II TRANSCRIPTION MEDIATOR ACTIVITY	1.6326e-08	0.1826	0.16153	1	1
2	BIOCARTA RANMS PATHWAY	0.015348	0.17888	0.20055	1	1
2	RNA 3END PROCESSING	5.0676e-14	0.17863	0.19098	1	1
2	BIOCARTA CARM ER PATHWAY	7.2861e-07	0.17737	0.12509	1	1
2	REACTOME FANCONI ANEMIA PATHWAY	0.00032298	0.17689	0.21841	1	1
2	REACTOME EXTENSION OF TELOMERES	0.0012797	0.17191	0.14647	1	1
2	BIOCARTA ATRBRCA PATHWAY	0.00046523	0.16992	0.18933	1	1
2	DNA DEPENDENT ATPASE ACTIVITY	0.0017878	0.1698	0.16002	1	1
2	PID ATR PATHWAY	0.013284	0.16921	0.13424	1	1
2	NUCLEOLAR PART	2.5852e-10	0.16826	0.16489	1	1
2	REACTOME DNA STRAND ELONGATION	0.019046	0.16486	0.14335	1	1
2	BIOCARTA RARRXR PATHWAY	1.0466e-07	0.16345	0.16753	1	1
2	INTEGRATOR COMPLEX	1.7217e-11	0.16039	0.17241	1	1
2	MICROTUBULE	3.349e-05	0.15889	0.1746	1	1
2	ATP DEPENDENT HELICASE ACTIVITY	1.3701e-09	0.15776	0.16586	1	1
2	REACTOME RECRUITMENT OF NUMA TO MITOTIC CENTROSOMES	1.8463e-05	0.15606	0.19224	1	1
2	TRANSCRIPTION INITIATION FROM RNA POLYMERASE II PROMOTER	4.7593e-13	0.15541	0.18028	1	1
2	ANDROGEN RECEPTOR SIGNALING PATHWAY	2.9411e-07	0.15533	0.16188	1	1
2	PID FANCONI PATHWAY	0.0010369	0.1548	0.15329	1	1
2	REACTOME RNA POL I TRANSCRIPTION INITIATION	7.7075e-11	0.15434	0.1625	1	1
2	PID BARD1PATHWAY	9.1923e-05	0.15309	0.18287	1	1
2	ENDONUCLEASE ACTIVITY GO 0016893	0.00041953	0.15233	0.13417	1	1
2	REACTOME PROCESSING OF INTRONLESS PRE MRNAS	1.7297e-10	0.15111	0.16871	1	1
2	KEGG NON HOMOLOGOUS END JOINING	1.983e-11	0.15075	0.17936	1	1
2	TRANSLATION INITIATION FACTOR ACTIVITY	5.3411e-14	0.14942	0.1695	1	1
2	HELICASE ACTIVITY	1.7077e-10	0.14867	0.15979	1	1
2	HISTONE METHYLTRANSFERASE ACTIVITY	0.0015636	0.1472	0.16225	1	1
2	CHROMATIN ASSEMBLY	4.7965e-08	0.14663	0.16705	1	1
2	SPLICEOSOME ASSEMBLY	3.3951e-12	0.14396	0.15288	1	1
2	REACTOME DEADENYLATION DEPENDENT MRNA DECAY	1.8733e-13	0.14332	0.15457	1	1
2	REACTOME NEP NS2 INTERACTS WITH THE CELLULAR EXPORT MACHINERY	3.7723e-07	0.14316	0.15413	1	1
2	REACTOME TRANSPORT OF RIBONUCLEOPROTEINS INTO THE HOST NUCLEUS	4.0131e-07	0.14102	0.15254	1	1
2	NUCLEOLUS	8.0442e-13	0.13843	0.14351	1	1
2	CHROMATIN ASSEMBLY OR DISASSEMBLY	2.8088e-11	0.13742	0.16857	1	1
2	REACTOME INTERACTIONS OF VPR WITH HOST CELLULAR PROTEINS	4.116e-09	0.1369	0.14577	1	1
2	REACTOME MTORC1 MEDIATED SIGNALLING	2.2113e-07	0.13661	0.13074	1	1
2	TRANSCRIPTION INITIATION	1.3453e-09	0.13572	0.1382	1	1
2	DNA DIRECTED DNA POLYMERASE ACTIVITY	0.0015794	0.13466	0.15628	1	1
2	PID DNAPK PATHWAY	1.4937e-12	0.13426	0.1385	1	1
2	NUCLEAR PORE	4.002e-06	0.1333	0.11298	1	1
2	TRANSLATION FACTOR ACTIVITY NUCLEIC ACID BINDING	4.2111e-12	0.13234	0.14016	1	1
2	PROTEIN TRANSPORTER ACTIVITY	1.5687e-08	0.12997	0.12101	1	1
2	BIOCARTA MTOR PATHWAY	2.6775e-07	0.12944	0.10732	1	1
2	REACTOME DEADENYLATION OF MRNA	1.3409e-11	0.1291	0.14427	1	1
2	REACTOME DESTABILIZATION OF MRNA BY KSRP	3.3806e-08	0.12784	0.11651	1	1
2	RNA HELICASE ACTIVITY	1.0708e-05	0.1261	0.11137	1	1
2	REACTOME TRANSPORT OF MATURE MRNA DERIVED FROM AN INTRONLESS TRANSCRIPT	1.0466e-07	0.12471	0.14794	1	1
2	GENERAL RNA POLYMERASE II TRANSCRIPTION FACTOR ACTIVITY	4.4613e-10	0.12461	0.12742	1	1
2	RIBONUCLEOPROTEIN COMPLEX BIOGENESIS AND ASSEMBLY	1.7054e-09	0.12379	0.11937	1	1
2	ENDODEOXYRIBONUCLEASE ACTIVITY	0.00096034	0.12373	0.12307	1	1
2	REACTOME METABOLISM OF NON CODING RNA	4.1604e-07	0.11816	0.12472	1	1
2	REACTOME ELONGATION ARREST AND RECOVERY	9.2942e-09	0.11797	0.1173	1	1
2	PID ATM PATHWAY	2.4016e-05	0.11721	0.15095	1	1
2	TRANSLATION REGULATOR ACTIVITY	3.7301e-10	0.11611	0.12006	1	1
2	DAMAGED DNA BINDING	1.2879e-05	0.11565	0.13055	1	1
2	REACTOME LATE PHASE OF HIV LIFE CYCLE	4.8853e-10	0.11298	0.11222	1	1
2	CHROMOSOME ORGANIZATION AND BIOGENESIS	7.1335e-05	0.11225	0.12408	1	1
2	BIOCARTA EIF PATHWAY	5.004e-07	0.11197	0.090366	1	1
2	PROTEIN DNA COMPLEX ASSEMBLY	2.4008e-08	0.1103	0.11827	1	1
2	KEGG DNA REPLICATION	0.0055837	0.11019	0.13036	1	1
2	REACTOME RNA POL III TRANSCRIPTION INITIATION FROM TYPE 2 PROMOTER	4.8853e-10	0.10914	0.12987	1	1
2	REACTOME TRANSPORT OF MATURE TRANSCRIPT TO CYTOPLASM	4.658e-07	0.10903	0.12301	1	1
2	NUCLEAR HORMONE RECEPTOR BINDING	7.0459e-05	0.10836	0.09306	1	1
2	KEGG RNA DEGRADATION	3.9562e-12	0.108	0.12645	1	1
2	REACTOME PROCESSING OF CAPPED INTRONLESS PRE MRNA	8.3043e-07	0.10784	0.11734	1	1
2	RNA DEPENDENT ATPASE ACTIVITY	1.319e-06	0.10784	0.11692	1	1
2	REACTOME APC CDC20 MEDIATED DEGRADATION OF NEK2A	0.071972	0.10635	0.11942	1	1
2	MEDIATOR COMPLEX	8.9975e-07	0.10549	0.10174	1	1
2	KEGG RNA POLYMERASE	9.8933e-07	0.10548	0.11036	1	1
2	REACTOME INHIBITION OF REPLICATION INITIATION OF DAMAGED DNA BY RB1 E2F1	8.5779e-05	0.10538	0.12964	1	1
2	HISTONE DEACETYLASE COMPLEX	1.0257e-05	0.1053	0.085079	1	1
2	REACTOME RNA POL III TRANSCRIPTION	1.2126e-09	0.10478	0.11098	1	1
2	RNA PROCESSING	4.6467e-10	0.10473	0.12363	1	1
2	THYROID HORMONE RECEPTOR BINDING	0.0034308	0.10443	0.088613	1	1
2	REACTOME FORMATION OF RNA POL II ELONGATION COMPLEX	4.9778e-10	0.10438	0.11464	1	1
2	PROTEIN RNA COMPLEX ASSEMBLY	3.2149e-08	0.10421	0.10484	1	1
2	REACTOME VIRAL MESSENGER RNA SYNTHESIS	0.00036969	0.10335	0.083132	1	1
2	PROTEIN METHYLTRANSFERASE ACTIVITY	0.016197	0.10117	0.099842	1	1
2	HORMONE RECEPTOR BINDING	1.6827e-05	0.099267	0.094847	1	1
2	RESPONSE TO IONIZING RADIATION	0.0001368	0.098705	0.092355	1	1
2	TRNA PROCESSING	4.1091e-05	0.096025	0.087925	1	1
2	NUCLEAR EXPORT	8.3364e-05	0.093583	0.10102	1	1
2	REACTOME INHIBITION OF THE PROTEOLYTIC ACTIVITY OF APC C REQUIRED FOR THE ONSET OF ANAPHASE BY MITOTIC SPINDLE CHECKPOINT COMPONENTS	0.066419	0.093178	0.11335	1	1
2	REACTOME PHOSPHORYLATION OF THE APC C	0.032823	0.092638	0.1166	1	1
2	REACTOME G1 PHASE	0.00027653	0.092351	0.11208	1	1
2	ATP DEPENDENT RNA HELICASE ACTIVITY	2.4384e-05	0.090513	0.10306	1	1
2	REACTOME MRNA CAPPING	4.4938e-07	0.089124	0.093914	1	1
2	REACTOME LAGGING STRAND SYNTHESIS	0.05499	0.088437	0.10064	1	1
2	CENTROSOME CYCLE	0.00042737	0.086205	0.14131	1	1
2	REACTOME REGULATION OF GLUCOKINASE BY GLUCOKINASE REGULATORY PROTEIN	0.010367	0.086144	0.06343	1	1
2	REACTOME DESTABILIZATION OF MRNA BY BRF1	3.7282e-06	0.086026	0.087576	1	1
2	REACTOME RNA POL III TRANSCRIPTION TERMINATION	1.0854e-05	0.085326	0.098683	1	1
2	KEGG MISMATCH REPAIR	0.028478	0.085198	0.075236	1	1
2	REACTOME FORMATION OF THE HIV1 EARLY ELONGATION COMPLEX	1.1949e-06	0.084303	0.099508	1	1
2	STEROID HORMONE RECEPTOR SIGNALING PATHWAY	0.062456	0.083953	0.042306	1	1
2	DOUBLE STRANDED DNA BINDING	0.00021887	0.083303	0.10837	1	1
2	ESTABLISHMENT AND OR MAINTENANCE OF CHROMATIN ARCHITECTURE	9.7951e-07	0.082543	0.094968	1	1
2	REACTOME FORMATION OF TRANSCRIPTION COUPLED NER TC NER REPAIR COMPLEX	1.1371e-06	0.081929	0.089301	1	1
2	GENE SILENCING	4.7437e-05	0.081785	0.11058	1	1
2	REACTOME MITOCHONDRIAL TRNA AMINOACYLATION	0.00036556	0.081533	0.058941	1	1
2	NUCLEAR MEMBRANE	0.00037947	0.081156	0.069997	1	1
2	REGULATION OF CHROMOSOME ORGANIZATION AND BIOGENESIS	0.00064781	0.080965	0.081948	1	1
2	PORE COMPLEX	0.0074041	0.080964	0.055337	1	1
2	KEGG AMINOACYL TRNA BIOSYNTHESIS	1.7823e-05	0.080829	0.067903	1	1
2	TRANSLATIONAL INITIATION	2.0986e-06	0.080599	0.093302	1	1
2	NUCLEOTIDE EXCISION REPAIR	3.1124e-06	0.07965	0.097094	1	1
2	NUCLEAR MEMBRANE PART	0.00011294	0.07927	0.080814	1	1
2	CHROMATIN MODIFICATION	6.9714e-06	0.078071	0.090712	1	1
2	REACTOME MITOCHONDRIAL PROTEIN IMPORT	0.00028184	0.077538	0.092767	1	1
2	STEROID HORMONE RECEPTOR BINDING	0.0065713	0.0762	0.10588	1	1
2	PROTEIN STABILIZATION	0.004056	0.073995	0.067463	1	1
2	LIGASE ACTIVITY FORMING CARBON OXYGEN BONDS	0.032543	0.073911	0.049633	1	1
2	TRANSCRIPTION FACTOR COMPLEX	1.2261e-08	0.073447	0.079233	1	1
2	STRUCTURE SPECIFIC DNA BINDING	0.0001713	0.073366	0.08451	1	1
2	REACTOME TRNA AMINOACYLATION	8.0517e-05	0.073193	0.070288	1	1
2	REACTOME DESTABILIZATION OF MRNA BY TRISTETRAPROLIN TTP	0.0052962	0.072812	0.061715	1	1
2	REACTOME COPI MEDIATED TRANSPORT	8.2624e-06	0.072695	0.067766	1	1
2	TRANSCRIPTION ELONGATION REGULATOR ACTIVITY	4.3416e-05	0.072154	0.051844	1	1
2	REACTOME CYTOSOLIC TRNA AMINOACYLATION	0.0020279	0.071108	0.08299	1	1
2	CHROMOSOME	0.035953	0.070698	0.086277	1	1
2	REPLICATION FORK	0.020229	0.070303	0.095094	1	1
2	NUCLEAR LUMEN	1.4647e-08	0.070235	0.090638	1	1
2	REACTOME RNA POL I TRANSCRIPTION TERMINATION	0.0016527	0.070176	0.071145	1	1
2	REACTOME RNA POL I RNA POL III AND MITOCHONDRIAL TRANSCRIPTION	0.075773	0.068687	0.079862	1	1
2	CHAPERONE BINDING	0.017972	0.06845	0.051032	1	1
2	REACTOME TRANSCRIPTION	0.003829	0.068269	0.083809	1	1
2	NUCLEOPLASM	3.9087e-06	0.068005	0.075935	1	1
2	COVALENT CHROMATIN MODIFICATION	0.0042556	0.066964	0.076871	1	1
2	NUCLEAR CHROMOSOME PART	0.0039257	0.066783	0.078697	1	1
2	NUCLEOPLASM PART	2.1035e-07	0.065558	0.078015	1	1
2	BIOCARTA EIF2 PATHWAY	0.02131	0.065527	0.067898	1	1
2	REACTOME RNA POL III CHAIN ELONGATION	0.0005025	0.063179	0.084047	1	1
2	DNA DAMAGE RESPONSESIGNAL TRANSDUCTION BY P53 CLASS MEDIATOR	0.0033985	0.062388	0.068908	1	1
2	NUCLEAR CHROMOSOME	0.012229	0.062163	0.061808	1	1
2	DNA DIRECTED RNA POLYMERASEII HOLOENZYME	1.779e-06	0.059002	0.076654	1	1
2	RNA POLYMERASE ACTIVITY	0.017829	0.058888	0.053452	1	1
2	REGULATION OF TRANSLATIONAL INITIATION	0.0001157	0.058269	0.077195	1	1
2	TRNA METABOLIC PROCESS	0.020602	0.051718	0.036687	1	1
2	BASE EXCISION REPAIR	0.024049	0.051563	0.061553	1	1
2	REACTOME RNA POL III TRANSCRIPTION INITIATION FROM TYPE 3 PROMOTER	0.00015344	0.050137	0.070683	1	1
2	REACTOME ACTIVATION OF CHAPERONES BY ATF6 ALPHA	0.083779	0.046641	0.049372	1	1
2	PID RANBP2PATHWAY	0.077322	0.042786	0.024294	1	1
2	NUCLEAR MATRIX	0.014225	0.042079	0.10552	1	1
3	REACTOME GABA A RECEPTOR ACTIVATION	1.0521e-31	3.0374	3.1815	1	1
3	SEROTONIN RECEPTOR ACTIVITY	1.9182e-31	2.7316	2.5957	1	1
3	REACTOME DOPAMINE NEUROTRANSMITTER RELEASE CYCLE	5.1843e-32	2.7134	2.8004	1	1
3	REACTOME SEROTONIN RECEPTORS	1.9857e-31	2.5105	2.4727	1	1
3	REACTOME LIGAND GATED ION CHANNEL TRANSPORT	1.5586e-31	2.4248	2.4679	1	1
3	BIOCARTA GABA PATHWAY	6.0301e-32	2.4072	2.521	1	1
3	REACTOME NOREPINEPHRINE NEUROTRANSMITTER RELEASE CYCLE	5.5589e-32	2.2411	2.3143	1	1
3	REACTOME GLUTAMATE NEUROTRANSMITTER RELEASE CYCLE	3.6131e-32	2.2266	2.2952	1	1
3	REACTOME RAS ACTIVATION UOPN CA2 INFUX THROUGH NMDA RECEPTOR	4.3033e-32	2.1826	2.1938	1	1
3	BIOCARTA CACAM PATHWAY	5.2449e-32	2.1675	2.1208	1	1
3	REACTOME ACETYLCHOLINE NEUROTRANSMITTER RELEASE CYCLE	1.1542e-31	2.142	2.1884	1	1
3	METABOTROPIC GLUTAMATEGABA B LIKE RECEPTOR ACTIVITY	1.1676e-31	2.0715	2.1996	1	1
3	REACTOME CREB PHOSPHORYLATION THROUGH THE ACTIVATION OF CAMKII	4.2535e-32	2.0709	2.0768	1	1
3	REACTOME GABA SYNTHESIS RELEASE REUPTAKE AND DEGRADATION	5.5589e-32	2.0688	2.2199	1	1
3	AMINE RECEPTOR ACTIVITY	1.3886e-31	1.9999	2.0141	1	1
3	REACTOME UNBLOCKING OF NMDA RECEPTOR GLUTAMATE BINDING AND ACTIVATION	6.1719e-32	1.9146	1.9581	1	1
3	REACTOME VOLTAGE GATED POTASSIUM CHANNELS	6.8519e-32	1.8876	1.8875	1	1
3	NEUROTRANSMITTER SECRETION	1.3107e-31	1.8325	1.9916	1	1
3	DELAYED RECTIFIER POTASSIUM CHANNEL ACTIVITY	7.0947e-32	1.794	1.792	1	1
3	G PROTEIN SIGNALING ADENYLATE CYCLASE INHIBITING PATHWAY	4.5014e-30	1.7901	1.7736	1	1
3	VOLTAGE GATED CALCIUM CHANNEL COMPLEX	1.9404e-31	1.7843	1.8461	1	1
3	NEUROPEPTIDE HORMONE ACTIVITY	1.4108e-27	1.7646	1.7537	1	1
3	POTASSIUM CHANNEL REGULATOR ACTIVITY	7.695e-32	1.7368	1.7385	1	1
3	REGULATED SECRETORY PATHWAY	1.1676e-31	1.6992	1.8239	1	1
3	REACTOME AMINE LIGAND BINDING RECEPTORS	1.9404e-31	1.6878	1.7116	1	1
3	REACTOME NEUROTRANSMITTER RELEASE CYCLE	7.0947e-32	1.6757	1.754	1	1
3	VOLTAGE GATED POTASSIUM CHANNEL ACTIVITY	4.4563e-32	1.66	1.6706	1	1
3	GLUTAMATE RECEPTOR ACTIVITY	1.5767e-31	1.6448	1.6547	1	1
3	SYNAPSE PART	4.1555e-32	1.5996	1.6146	1	1
3	REACTOME INTERACTION BETWEEN L1 AND ANKYRINS	2.9362e-31	1.597	1.6183	1	1
3	GABA RECEPTOR ACTIVITY	7.9491e-31	1.5867	1.7238	1	1
3	VOLTAGE GATED CATION CHANNEL ACTIVITY	7.2613e-32	1.5704	1.5582	1	1
3	REACTOME POST NMDA RECEPTOR ACTIVATION EVENTS	5.8916e-32	1.555	1.5275	1	1
3	VOLTAGE GATED SODIUM CHANNEL ACTIVITY	1.3813e-29	1.5316	1.4978	1	1
3	BIOCARTA PGC1A PATHWAY	6.7728e-32	1.5113	1.4957	1	1
3	BIOCARTA NOS1 PATHWAY	5.0064e-32	1.5098	1.5475	1	1
3	VOLTAGE GATED CALCIUM CHANNEL ACTIVITY	1.5554e-30	1.5059	1.5974	1	1
3	ACETYLCHOLINE BINDING	3.0679e-30	1.4801	1.4645	1	1
3	AUXILIARY TRANSPORT PROTEIN ACTIVITY	8.641e-32	1.4747	1.4931	1	1
3	REACTOME CREB PHOSPHORYLATION THROUGH THE ACTIVATION OF RAS	6.4654e-32	1.4692	1.4639	1	1
3	INWARD RECTIFIER POTASSIUM CHANNEL ACTIVITY	6.3992e-31	1.4615	1.4993	1	1
3	REACTOME TRAFFICKING OF AMPA RECEPTORS	4.7787e-32	1.4549	1.5122	1	1
3	VOLTAGE GATED CHANNEL ACTIVITY	8.5414e-32	1.451	1.4485	1	1
3	CHANNEL REGULATOR ACTIVITY	7.2613e-32	1.4473	1.4727	1	1
3	VOLTAGE GATED POTASSIUM CHANNEL COMPLEX	1.1812e-31	1.4416	1.4663	1	1
3	REACTOME ACTIVATION OF NMDA RECEPTOR UPON GLUTAMATE BINDING AND POSTSYNAPTIC EVENTS	5.8916e-32	1.4343	1.4198	1	1
3	AXON	1.4696e-30	1.4305	1.408	1	1
3	AMINE BINDING	9.3245e-31	1.4172	1.3865	1	1
3	NEUROTRANSMITTER RECEPTOR ACTIVITY	3.8233e-31	1.4139	1.3982	1	1
3	SODIUM CHANNEL ACTIVITY	4.1063e-29	1.3674	1.2754	1	1
3	NEUROTRANSMITTER BINDING	4.2388e-31	1.3594	1.348	1	1
3	SYNAPTIC VESICLE	8.2495e-32	1.3561	1.3927	1	1
3	CALCIUM CHANNEL ACTIVITY	3.256e-31	1.3542	1.3677	1	1
3	POTASSIUM ION TRANSPORT	9.4803e-32	1.3319	1.3482	1	1
3	EXCITATORY EXTRACELLULAR LIGAND GATED ION CHANNEL ACTIVITY	2.9994e-30	1.3283	1.3192	1	1
3	REACTOME ION CHANNEL TRANSPORT	3.5284e-31	1.3084	1.3396	1	1
3	REACTOME CLASS C 3 METABOTROPIC GLUTAMATE PHEROMONE RECEPTORS	7.2556e-31	1.293	1.2959	1	1
3	REACTOME TRANSMISSION ACROSS CHEMICAL SYNAPSES	6.1719e-32	1.2912	1.3357	1	1
3	REACTOME POTASSIUM CHANNELS	6.244e-32	1.2855	1.2853	1	1
3	REACTOME NEURONAL SYSTEM	5.0064e-32	1.2837	1.3078	1	1
3	GATED CHANNEL ACTIVITY	1.853e-31	1.2806	1.2766	1	1
3	EXTRACELLULAR LIGAND GATED ION CHANNEL ACTIVITY	3.1028e-30	1.2567	1.2596	1	1
3	POTASSIUM CHANNEL ACTIVITY	9.2632e-32	1.2549	1.2779	1	1
3	SYNAPTIC TRANSMISSION	5.5589e-32	1.253	1.3525	1	1
3	LIGAND GATED CHANNEL ACTIVITY	3.1028e-30	1.2513	1.2511	1	1
3	REACTOME HIGHLY CALCIUM PERMEABLE POSTSYNAPTIC NICOTINIC ACETYLCHOLINE RECEPTORS	2.1914e-27	1.2481	1.2888	1	1
3	NICOTINIC ACETYLCHOLINE GATED RECEPTOR CHANNEL COMPLEX	1.8858e-27	1.2349	1.2933	1	1
3	NICOTINIC ACETYLCHOLINE ACTIVATED CATION SELECTIVE CHANNEL ACTIVITY	1.8858e-27	1.2349	1.2933	1	1
3	CATION CHANNEL ACTIVITY	1.4376e-31	1.2282	1.2438	1	1
3	REGULATION OF NEUROTRANSMITTER LEVELS	2.1524e-31	1.2065	1.2301	1	1
3	REACTOME NEUROTRANSMITTER RECEPTOR BINDING AND DOWNSTREAM TRANSMISSION IN THE POSTSYNAPTIC CELL	8.2495e-32	1.204	1.2309	1	1
3	SECRETIN LIKE RECEPTOR ACTIVITY	6.8531e-31	1.1974	1.2896	1	1
3	CYCLIC NUCLEOTIDE PHOSPHODIESTERASE ACTIVITY	4.5404e-31	1.1961	1.1848	1	1
3	REACTOME GABA RECEPTOR ACTIVATION	1.523e-31	1.1797	1.2285	1	1
3	3 5 CYCLIC NUCLEOTIDE PHOSPHODIESTERASE ACTIVITY	4.1428e-31	1.1775	1.2437	1	1
3	ION CHANNEL ACTIVITY	1.523e-31	1.1717	1.1464	1	1
3	NEURON PROJECTION	3.1098e-31	1.1672	1.1593	1	1
3	BIOCARTA BARRESTIN PATHWAY	1.5407e-31	1.165	1.1381	1	1
3	TRANSMISSION OF NERVE IMPULSE	5.5589e-32	1.1628	1.2639	1	1
3	REACTOME TRAFFICKING OF GLUR2 CONTAINING AMPA RECEPTORS	6.3908e-32	1.1526	1.2335	1	1
3	SUBSTRATE SPECIFIC CHANNEL ACTIVITY	1.9629e-31	1.1359	1.1166	1	1
3	METAL ION TRANSMEMBRANE TRANSPORTER ACTIVITY	1.8108e-31	1.1307	1.1266	1	1
3	GENERATION OF A SIGNAL INVOLVED IN CELL CELL SIGNALING	7.2556e-31	1.1291	1.1597	1	1
3	IONOTROPIC GLUTAMATE RECEPTOR ACTIVITY	1.1875e-27	1.1191	1.1098	1	1
3	G PROTEIN SIGNALING COUPLED TO CYCLIC NUCLEOTIDE SECOND MESSENGER	4.7532e-31	1.1052	1.0659	1	1
3	BIOCARTA NDKDYNAMIN PATHWAY	1.102e-31	1.096	1.0563	1	1
3	CYCLIC NUCLEOTIDE MEDIATED SIGNALING	4.9193e-31	1.0858	1.0438	1	1
3	G PROTEIN SIGNALING COUPLED TO CAMP NUCLEOTIDE SECOND MESSENGER	1.1576e-30	1.057	1.0271	1	1
3	NEUROPEPTIDE RECEPTOR ACTIVITY	1.3968e-29	1.052	1.0604	1	1
3	REACTOME CA DEPENDENT EVENTS	1.102e-31	1.0516	1.0494	1	1
3	GLUTAMATE SIGNALING PATHWAY	1.2364e-28	1.0466	1.0797	1	1
3	CAMP MEDIATED SIGNALING	1.1978e-30	1.0421	1.0096	1	1
3	BIOCARTA CK1 PATHWAY	1.8745e-31	1.0388	1.0971	1	1
3	BIOCARTA BARR MAPK PATHWAY	8.641e-32	1.0337	1.0238	1	1
3	CIRCADIAN RHYTHM	1.0957e-28	1.0262	0.98598	1	1
3	REACTOME DAG AND IP3 SIGNALING	1.1148e-31	1.0257	1.0192	1	1
3	REGULATION OF NEUROGENESIS	1.1409e-31	1.007	1.024	1	1
3	NEUROPEPTIDE BINDING	1.5792e-29	1.0063	1.0131	1	1
3	REACTOME BOTULINUM NEUROTOXICITY	2.8347e-30	1.0053	1.033	1	1
3	KEGG CALCIUM SIGNALING PATHWAY	2.5579e-31	0.99324	1.0122	1	1
3	INTERMEDIATE FILAMENT CYTOSKELETON	9.5729e-24	0.98345	0.95555	1	1
3	INTERMEDIATE FILAMENT	9.5729e-24	0.98345	0.95555	1	1
3	MONOVALENT INORGANIC CATION TRANSPORT	2.228e-31	0.98255	0.99423	1	1
3	TRICARBOXYLIC ACID CYCLE INTERMEDIATE METABOLIC PROCESS	7.3808e-30	0.96672	0.94899	1	1
3	KEGG NEUROACTIVE LIGAND RECEPTOR INTERACTION	5.1497e-31	0.96308	0.95762	1	1
3	REACTOME NA CL DEPENDENT NEUROTRANSMITTER TRANSPORTERS	2.3846e-28	0.96145	1.0191	1	1
3	SYNAPSE	1.1409e-31	0.96055	0.94488	1	1
3	DENDRITE	8.8436e-32	0.95738	0.98377	1	1
3	REGULATION OF HEART CONTRACTION	3.2564e-27	0.95655	0.91512	1	1
3	REACTOME PRESYNAPTIC NICOTINIC ACETYLCHOLINE RECEPTORS	6.8672e-26	0.95379	1.0258	1	1
3	REACTOME ACETYLCHOLINE BINDING AND DOWNSTREAM EVENTS	1.7973e-26	0.95309	1.0061	1	1
3	REGULATION OF RESPONSE TO EXTERNAL STIMULUS	2.8167e-29	0.95158	0.99936	1	1
3	METAL ION TRANSPORT	2.4998e-31	0.9474	0.94216	1	1
3	REGULATION OF HORMONE SECRETION	2.5046e-25	0.94658	0.96198	1	1
3	BIOCARTA STATHMIN PATHWAY	1.0786e-23	0.93719	0.89217	1	1
3	CALCIUM ION TRANSMEMBRANE TRANSPORTER ACTIVITY	4.4864e-29	0.92023	0.91545	1	1
3	MICROTUBULE BASED MOVEMENT	2.5287e-31	0.91442	0.87323	1	1
3	KEGG LONG TERM POTENTIATION	6.5409e-32	0.90797	0.92188	1	1
3	ST WNT CA2 CYCLIC GMP PATHWAY	3.1473e-29	0.89699	0.91167	1	1
3	SMOOTH MUSCLE CONTRACTION GO 0006939	1.4907e-20	0.89582	0.87981	1	1
3	FEEDING BEHAVIOR	1.0035e-28	0.89379	0.92157	1	1
3	REACTOME DARPP 32 EVENTS	7.1775e-32	0.88711	0.92272	1	1
3	CATION TRANSMEMBRANE TRANSPORTER ACTIVITY	2.0555e-31	0.88465	0.88774	1	1
3	G PROTEIN SIGNALING ADENYLATE CYCLASE ACTIVATING PATHWAY	1.3508e-29	0.86504	0.87771	1	1
3	NEUTRAL AMINO ACID TRANSPORT	3.6001e-23	0.86085	0.83356	1	1
3	REACTOME AMINE DERIVED HORMONES	1.0944e-26	0.85314	0.84789	1	1
3	RHODOPSIN LIKE RECEPTOR ACTIVITY	3.9322e-30	0.84977	0.83696	1	1
3	BIOCARTA CREB PATHWAY	9.9297e-32	0.84717	0.84768	1	1
3	REACTOME TANDEM PORE DOMAIN POTASSIUM CHANNELS	1.3351e-28	0.84526	0.92838	1	1
3	BIOCARTA NO1 PATHWAY	5.8305e-30	0.8329	0.8502	1	1
3	REGULATION OF AXONOGENESIS	6.5973e-30	0.83135	0.85444	1	1
3	G PROTEIN COUPLED RECEPTOR ACTIVITY	2.0189e-30	0.83044	0.80123	1	1
3	REACTOME INSULIN SYNTHESIS AND PROCESSING	1.0449e-30	0.80894	0.81443	1	1
3	SECOND MESSENGER MEDIATED SIGNALING	6.2371e-30	0.80817	0.79519	1	1
3	CATION TRANSPORTING ATPASE ACTIVITY	3.4089e-31	0.8078	0.84999	1	1
3	L AMINO ACID TRANSMEMBRANE TRANSPORTER ACTIVITY	3.6352e-29	0.80675	0.78799	1	1
3	NEUROLOGICAL SYSTEM PROCESS	1.595e-31	0.80508	0.83897	1	1
3	REACTOME GAP JUNCTION ASSEMBLY	2.4287e-23	0.80493	0.79836	1	1
3	ION TRANSMEMBRANE TRANSPORTER ACTIVITY	4.1428e-31	0.80482	0.80022	1	1
3	BIOCARTA CFTR PATHWAY	7.2985e-30	0.80227	0.80126	1	1
3	CATION TRANSPORT	2.7723e-31	0.7988	0.81793	1	1
3	BIOCARTA AGPCR PATHWAY	1.1148e-31	0.79788	0.84538	1	1
3	REACTOME PHOSPHOLIPASE C MEDIATED CASCADE	1.9404e-31	0.79026	0.82028	1	1
3	REACTOME INHIBITION OF VOLTAGE GATED CA2 CHANNELS VIA GBETA GAMMA SUBUNITS	2.679e-30	0.7879	0.80681	1	1
3	REACTOME NITRIC OXIDE STIMULATES GUANYLATE CYCLASE	7.3943e-27	0.78783	0.77632	1	1
3	REACTOME IONOTROPIC ACTIVITY OF KAINATE RECEPTORS	3.0335e-30	0.78542	0.84163	1	1
3	MAP KINASE ACTIVITY	9.8772e-30	0.78138	0.78587	1	1
3	GROWTH CONE	3.256e-31	0.78004	0.84624	1	1
3	HORMONE SECRETION	9.1993e-24	0.77115	0.77738	1	1
3	REACTOME EFFECTS OF PIP2 HYDROLYSIS	7.012e-27	0.76775	0.71978	1	1
3	PID RAS PATHWAY	5.0911e-31	0.76579	0.81094	1	1
3	CHLORIDE CHANNEL ACTIVITY	1.0775e-19	0.76126	0.71998	1	1
3	REACTOME INWARDLY RECTIFYING K CHANNELS	1.297e-30	0.75896	0.75482	1	1
3	BIOCARTA BARRESTIN SRC PATHWAY	3.3316e-31	0.75558	0.7668	1	1
3	STRUCTURAL CONSTITUENT OF CYTOSKELETON	9.9255e-29	0.75379	0.72883	1	1
3	AXON GUIDANCE	1.7654e-29	0.75133	0.73735	1	1
3	DETECTION OF ABIOTIC STIMULUS	1.4571e-27	0.74818	0.78226	1	1
3	SITE OF POLARIZED GROWTH	2.6174e-31	0.7459	0.80406	1	1
3	REACTOME OPIOID SIGNALLING	3.6102e-31	0.74143	0.74696	1	1
3	ION TRANSPORT	1.1576e-30	0.74122	0.74559	1	1
3	SODIUM ION TRANSPORT	6.8672e-26	0.73958	0.68749	1	1
3	REACTOME PLATELET CALCIUM HOMEOSTASIS	6.7257e-26	0.73845	0.72871	1	1
3	TRANSMEMBRANE RECEPTOR PROTEIN PHOSPHATASE ACTIVITY	1.9803e-28	0.73153	0.79021	1	1
3	CELLULAR MORPHOGENESIS DURING DIFFERENTIATION	4.9193e-31	0.72815	0.71473	1	1
3	REACTOME PLC BETA MEDIATED EVENTS	3.5691e-31	0.72677	0.74995	1	1
3	PEPTIDE RECEPTOR ACTIVITY	9.3369e-27	0.72316	0.69219	1	1
3	ANCHORED TO MEMBRANE	6.1074e-27	0.72058	0.71606	1	1
3	ANCHORED TO PLASMA MEMBRANE	6.1074e-27	0.72058	0.71606	1	1
3	G PROTEIN COUPLED RECEPTOR PROTEIN SIGNALING PATHWAY	3.0335e-30	0.71958	0.72084	1	1
3	PHOSPHORIC DIESTER HYDROLASE ACTIVITY	1.2134e-27	0.71367	0.72128	1	1
3	KEGG CARDIAC MUSCLE CONTRACTION	2.8669e-30	0.71286	0.73926	1	1
3	ANION CHANNEL ACTIVITY	2.8361e-19	0.70561	0.66998	1	1
3	ANTIPORTER ACTIVITY	1.0714e-26	0.70548	0.72339	1	1
3	REACTOME RAP1 SIGNALLING	1.3268e-30	0.70125	0.74158	1	1
3	KEGG GLYCOSAMINOGLYCAN BIOSYNTHESIS HEPARAN SULFATE	2.5487e-29	0.70105	0.69577	1	1
3	SUBSTRATE SPECIFIC TRANSMEMBRANE TRANSPORTER ACTIVITY	5.4529e-31	0.70064	0.69688	1	1
3	ATPASE ACTIVITY COUPLED TO TRANSMEMBRANE MOVEMENT OF IONS PHOSPHORYLATIVE MECHANISM	3.5555e-29	0.69872	0.69133	1	1
3	BIOCARTA BIOPEPTIDES PATHWAY	7.9675e-32	0.69862	0.69162	1	1
3	KEGG PROXIMAL TUBULE BICARBONATE RECLAMATION	5.2066e-27	0.69812	0.71795	1	1
3	DI TRI VALENT INORGANIC CATION TRANSMEMBRANE TRANSPORTER ACTIVITY	2.2806e-29	0.69715	0.69455	1	1
3	REACTOME G ALPHA Z SIGNALLING EVENTS	2.0651e-30	0.69691	0.70429	1	1
3	KEGG AMYOTROPHIC LATERAL SCLEROSIS ALS	2.1278e-31	0.69487	0.69204	1	1
3	AXONOGENESIS	1.342e-30	0.6932	0.69625	1	1
3	REACTOME AMINE COMPOUND SLC TRANSPORTERS	2.8629e-25	0.68629	0.69894	1	1
3	REGULATION OF HOMEOSTATIC PROCESS	1.0088e-25	0.68571	0.62748	1	1
3	CELL MATURATION	1.7103e-25	0.68344	0.71288	1	1
3	REACTOME ACTIVATION OF RAC	1.8862e-30	0.68326	0.68879	1	1
3	BIOCARTA GLYCOLYSIS PATHWAY	3.5851e-27	0.68221	0.66904	1	1
3	REACTOME SIGNALING BY FGFR3 MUTANTS	4.9271e-23	0.6783	0.66267	1	1
3	SYSTEM PROCESS	1.9077e-30	0.67673	0.67232	1	1
3	REACTOME RETROGRADE NEUROTROPHIN SIGNALLING	1.1552e-29	0.67422	0.68243	1	1
3	ATPASE ACTIVITY COUPLED TO TRANSMEMBRANE MOVEMENT OF IONS	3.9768e-30	0.67158	0.66919	1	1
3	PERIPHERAL NERVOUS SYSTEM DEVELOPMENT	5.4035e-26	0.67134	0.71011	1	1
3	PROTEIN AMINO ACID AUTOPHOSPHORYLATION	4.3907e-27	0.66797	0.65512	1	1
3	PHOSPHOLIPASE C ACTIVITY	1.8929e-17	0.66793	0.70915	1	1
3	BIOCARTA DREAM PATHWAY	4.2016e-28	0.66643	0.6933	1	1
3	REACTOME GAP JUNCTION TRAFFICKING	9.188e-26	0.66568	0.65281	1	1
3	BIOCARTA AT1R PATHWAY	3.0392e-31	0.65945	0.64665	1	1
3	REACTOME GABA B RECEPTOR ACTIVATION	2.7713e-30	0.65863	0.68986	1	1
3	PROTEIN AUTOPROCESSING	6.4408e-27	0.65542	0.65011	1	1
3	CELL CELL SIGNALING	2.3656e-30	0.65276	0.67036	1	1
3	SARCOMERE	3.185e-21	0.65192	0.69686	1	1
3	CALCIUM ION TRANSPORT	2.6293e-27	0.65107	0.70734	1	1
3	REACTOME REGULATION OF INSULIN SECRETION	1.4048e-31	0.6507	0.6592	1	1
3	ADENYLATE CYCLASE ACTIVATION	2.2364e-25	0.65055	0.61683	1	1
3	REACTOME G ALPHA S SIGNALLING EVENTS	1.1188e-30	0.64991	0.64495	1	1
3	REGULATION OF SYNAPSE STRUCTURE AND ACTIVITY	4.2016e-28	0.64955	0.65914	1	1
3	CYTOSKELETON DEPENDENT INTRACELLULAR TRANSPORT	1.4575e-28	0.64674	0.62704	1	1
3	REACTOME ADENYLATE CYCLASE ACTIVATING PATHWAY	1.1664e-25	0.64658	0.6736	1	1
3	TRANSMEMBRANE TRANSPORTER ACTIVITY	9.5393e-31	0.64393	0.6421	1	1
3	INOSITOL OR PHOSPHATIDYLINOSITOL PHOSPHODIESTERASE ACTIVITY	5.3032e-15	0.64387	0.68605	1	1
3	BIOCARTA PLCE PATHWAY	1.2229e-28	0.64117	0.67336	1	1
3	REACTOME PROTEOLYTIC CLEAVAGE OF SNARE COMPLEX PROTEINS	7.7195e-30	0.63891	0.668	1	1
3	BIOCARTA GPCR PATHWAY	5.2695e-30	0.63812	0.63793	1	1
3	PHOTOTRANSDUCTION	9.7409e-27	0.63797	0.63299	1	1
3	CELL SOMA	1.1497e-27	0.63668	0.63938	1	1
3	SUBSTRATE SPECIFIC TRANSPORTER ACTIVITY	1.1842e-30	0.63498	0.6218	1	1
3	KEGG ALDOSTERONE REGULATED SODIUM REABSORPTION	1.3206e-28	0.63328	0.63178	1	1
3	CYTOSOLIC PART	4.6364e-25	0.62724	0.65058	1	1
3	PDZ DOMAIN BINDING	2.491e-28	0.62341	0.66172	1	1
3	REACTOME REGULATION OF INSULIN SECRETION BY GLUCAGON LIKE PEPTIDE1	5.7654e-30	0.62317	0.62002	1	1
3	REACTOME L1CAM INTERACTIONS	1.3063e-29	0.6226	0.61154	1	1
3	BIOCARTA HDAC PATHWAY	1.8026e-30	0.62214	0.61819	1	1
3	REACTOME GLUCAGON TYPE LIGAND RECEPTORS	1.9588e-28	0.6206	0.62419	1	1
3	NEGATIVE REGULATION OF RESPONSE TO STIMULUS	1.2114e-19	0.62052	0.5626	1	1
3	NEURITE DEVELOPMENT	2.9657e-30	0.61952	0.59155	1	1
3	DEAMINASE ACTIVITY	1.9788e-22	0.61761	0.65394	1	1
3	REACTOME ADHERENS JUNCTIONS INTERACTIONS	3.4834e-26	0.61749	0.62435	1	1
3	GENERATION OF NEURONS	6.2546e-31	0.61244	0.59905	1	1
3	MYOFIBRIL	1.2056e-20	0.61221	0.65698	1	1
3	NEURON DEVELOPMENT	1.4204e-30	0.61141	0.58284	1	1
3	REACTOME PKA MEDIATED PHOSPHORYLATION OF CREB	2.4197e-30	0.60757	0.65681	1	1
3	NEURON DIFFERENTIATION	8.8081e-31	0.60747	0.60021	1	1
3	DEVELOPMENTAL MATURATION	2.8047e-25	0.60636	0.65744	1	1
3	EXOCYTOSIS	1.9358e-25	0.60551	0.62373	1	1
3	INORGANIC ANION TRANSMEMBRANE TRANSPORTER ACTIVITY	1.5264e-23	0.60342	0.61392	1	1
3	REACTOME INHIBITION OF INSULIN SECRETION BY ADRENALINE NORADRENALINE	1.1704e-28	0.60294	0.58142	1	1
3	REACTOME ION TRANSPORT BY P TYPE ATPASES	5.1644e-28	0.60103	0.62155	1	1
3	REACTOME CGMP EFFECTS	1.8975e-23	0.59942	0.59149	1	1
3	CENTRAL NERVOUS SYSTEM DEVELOPMENT	2.6783e-31	0.59764	0.6235	1	1
3	NERVOUS SYSTEM DEVELOPMENT	1.0521e-31	0.59709	0.61368	1	1
3	KEGG PHOSPHATIDYLINOSITOL SIGNALING SYSTEM	1.3268e-30	0.59541	0.57075	1	1
3	INORGANIC ANION TRANSPORT	4.073e-18	0.59416	0.65771	1	1
3	CARBONATE DEHYDRATASE ACTIVITY	2.908e-18	0.59393	0.6026	1	1
3	REACTOME BILE SALT AND ORGANIC ANION SLC TRANSPORTERS	5.3318e-10	0.59257	0.47047	1	1
3	OXIDOREDUCTASE ACTIVITY ACTING ON PEROXIDE AS ACCEPTOR	1.6411e-25	0.59212	0.58794	1	1
3	REACTOME PASSIVE TRANSPORT BY AQUAPORINS	1.085e-13	0.59142	0.57301	1	1
3	REACTOME AMINO ACID AND OLIGOPEPTIDE SLC TRANSPORTERS	1.6051e-27	0.58713	0.59975	1	1
3	KEGG LONG TERM DEPRESSION	5.6372e-30	0.58025	0.58934	1	1
3	CLATHRIN COATED VESICLE	7.2556e-31	0.57999	0.58738	1	1
3	INORGANIC CATION TRANSMEMBRANE TRANSPORTER ACTIVITY	7.4231e-31	0.57901	0.60314	1	1
3	PID LPA4 PATHWAY	1.7785e-26	0.57635	0.60845	1	1
3	INACTIVATION OF MAPK ACTIVITY	5.6307e-25	0.57517	0.58745	1	1
3	NEGATIVE REGULATION OF HYDROLASE ACTIVITY	4.1183e-13	0.57517	0.46915	1	1
3	KEGG ALANINE ASPARTATE AND GLUTAMATE METABOLISM	3.5305e-28	0.57361	0.56527	1	1
3	PURINE NUCLEOTIDE METABOLIC PROCESS	2.5896e-30	0.57172	0.60379	1	1
3	REACTOME INTEGRATION OF ENERGY METABOLISM	1.595e-31	0.57006	0.58131	1	1
3	PID NFAT 3PATHWAY	1.0812e-30	0.5686	0.58366	1	1
3	GLYCOSPHINGOLIPID METABOLIC PROCESS	1.4104e-28	0.56701	0.61523	1	1
3	REACTOME FGFR2C LIGAND BINDING AND ACTIVATION	1.0973e-21	0.56371	0.55417	1	1
3	CALMODULIN BINDING	7.0291e-24	0.56118	0.55986	1	1
3	APICAL PLASMA MEMBRANE	3.2992e-17	0.55823	0.55166	1	1
3	CONTRACTILE FIBER	1.0991e-20	0.55758	0.59022	1	1
3	KEGG AXON GUIDANCE	3.138e-30	0.55754	0.57382	1	1
3	KEGG GAP JUNCTION	6.5237e-30	0.55569	0.56988	1	1
3	REACTOME TETRAHYDROBIOPTERIN BH4 SYNTHESIS RECYCLING SALVAGE AND REGULATION	1.1075e-25	0.55521	0.55576	1	1
3	REGULATION OF MUSCLE CONTRACTION	3.2444e-17	0.55377	0.50909	1	1
3	PHOSPHATASE INHIBITOR ACTIVITY	1.4887e-27	0.55156	0.56448	1	1
3	KEGG TAURINE AND HYPOTAURINE METABOLISM	5.9916e-23	0.55117	0.59144	1	1
3	REACTOME GLUCAGON SIGNALING IN METABOLIC REGULATION	3.0782e-29	0.54872	0.5364	1	1
3	PID REELINPATHWAY	7.5455e-28	0.54857	0.5642	1	1
3	REACTOME ABCA TRANSPORTERS IN LIPID HOMEOSTASIS	4.6309e-21	0.54756	0.50951	1	1
3	EXTRINSIC TO PLASMA MEMBRANE	6.8694e-23	0.5459	0.58602	1	1
3	REACTOME SYNTHESIS OF BILE ACIDS AND BILE SALTS VIA 24 HYDROXYCHOLESTEROL	8.2523e-17	0.54519	0.49774	1	1
3	BIOCARTA PARKIN PATHWAY	3.8881e-30	0.54405	0.53474	1	1
3	BIOCARTA PYK2 PATHWAY	3.1457e-31	0.54311	0.52661	1	1
3	REACTOME HS GAG BIOSYNTHESIS	1.3904e-21	0.54277	0.53131	1	1
3	REACTOME GPCR LIGAND BINDING	1.2803e-25	0.54275	0.54732	1	1
3	KEGG NITROGEN METABOLISM	2.8998e-23	0.5401	0.54671	1	1
3	REACTOME AQUAPORIN MEDIATED TRANSPORT	6.7716e-28	0.53943	0.55121	1	1
3	REGULATION OF CYTOKINE SECRETION	8.9645e-17	0.53871	0.46591	1	1
3	PID IL8CXCR1 PATHWAY	5.633e-21	0.53838	0.53495	1	1
3	LEARNING AND OR MEMORY	7.7149e-27	0.53695	0.59502	1	1
3	PURINE RIBONUCLEOTIDE METABOLIC PROCESS	1.4575e-28	0.53317	0.52845	1	1
3	REACTOME REGULATION OF WATER BALANCE BY RENAL AQUAPORINS	3.3801e-28	0.53121	0.52926	1	1
3	AMINO ACID TRANSMEMBRANE TRANSPORTER ACTIVITY	6.1121e-24	0.529	0.51692	1	1
3	REACTOME G ALPHA I SIGNALLING EVENTS	6.6869e-24	0.52851	0.53647	1	1
3	DIGESTION	1.2944e-27	0.52799	0.58331	1	1
3	AMINO ACID TRANSPORT	1.0299e-25	0.52626	0.52319	1	1
3	NEUROGENESIS	1.0812e-30	0.52598	0.51062	1	1
3	MAP KINASE KINASE KINASE ACTIVITY	9.0751e-22	0.52419	0.48076	1	1
3	KEGG DILATED CARDIOMYOPATHY	2.8337e-25	0.52404	0.51254	1	1
3	NEUROPEPTIDE SIGNALING PATHWAY	4.7907e-16	0.52054	0.54002	1	1
3	REACTOME ACTIVATION OF KAINATE RECEPTORS UPON GLUTAMATE BINDING	8.4985e-28	0.52049	0.50244	1	1
3	MONOOXYGENASE ACTIVITY	3.5976e-21	0.5181	0.55604	1	1
3	KEGG TYPE II DIABETES MELLITUS	2.1449e-27	0.51808	0.5291	1	1
3	BIOCARTA IGF1R PATHWAY	7.0919e-31	0.51762	0.52828	1	1
3	REACTOME AMINO ACID SYNTHESIS AND INTERCONVERSION TRANSAMINATION	8.7618e-27	0.5175	0.51911	1	1
3	REACTOME FGFR LIGAND BINDING AND ACTIVATION	5.7469e-25	0.5161	0.53996	1	1
3	BIOCARTA CHREBP2 PATHWAY	1.0045e-31	0.51506	0.53523	1	1
3	REACTOME ACTIVATED POINT MUTANTS OF FGFR2	3.8175e-24	0.51327	0.55541	1	1
3	KINESIN COMPLEX	1.291e-14	0.51319	0.50546	1	1
3	REACTOME ACTIVATION OF THE AP1 FAMILY OF TRANSCRIPTION FACTORS	5.6857e-21	0.5113	0.51481	1	1
3	REGULATION OF G PROTEIN COUPLED RECEPTOR PROTEIN SIGNALING PATHWAY	1.7598e-26	0.51007	0.51734	1	1
3	BIOCARTA CDK5 PATHWAY	4.6108e-22	0.50954	0.51525	1	1
3	REACTOME TRANSPORT OF INORGANIC CATIONS ANIONS AND AMINO ACIDS OLIGOPEPTIDES	7.7944e-28	0.50769	0.51025	1	1
3	REACTOME CLASS A1 RHODOPSIN LIKE RECEPTORS	2.3579e-23	0.5064	0.52985	1	1
3	KEGG O GLYCAN BIOSYNTHESIS	2.737e-26	0.50568	0.51782	1	1
3	MONOVALENT INORGANIC CATION TRANSMEMBRANE TRANSPORTER ACTIVITY	6.0428e-27	0.50568	0.50315	1	1
3	PROTEIN PROCESSING	1.2532e-27	0.50405	0.49482	1	1
3	DI TRI VALENT INORGANIC CATION TRANSPORT	1.3552e-23	0.50255	0.52586	1	1
3	REACTOME G ALPHA Q SIGNALLING EVENTS	2.2631e-27	0.50148	0.5185	1	1
3	BIOCARTA MEF2D PATHWAY	3.1201e-27	0.50066	0.47585	1	1
3	REACTOME REGULATION OF INSULIN SECRETION BY ACETYLCHOLINE	5.2608e-24	0.49931	0.52494	1	1
3	REACTOME CLASS B 2 SECRETIN FAMILY RECEPTORS	1.1075e-25	0.49889	0.48588	1	1
3	ENDOTHELIAL CELL MIGRATION	4.312e-22	0.49683	0.50525	1	1
3	BIOCARTA VIP PATHWAY	1.1721e-24	0.49672	0.50699	1	1
3	REACTOME G PROTEIN ACTIVATION	1.7935e-24	0.49472	0.50284	1	1
3	PHOSPHORUS OXYGEN LYASE ACTIVITY	4.7907e-22	0.49372	0.49838	1	1
3	PID NETRIN PATHWAY	5.0376e-30	0.49352	0.51891	1	1
3	BIOCARTA AGR PATHWAY	1.0299e-25	0.49229	0.47897	1	1
3	HORMONE ACTIVITY	1.3254e-19	0.49221	0.49998	1	1
3	CONTRACTILE FIBER PART	1.7841e-17	0.49139	0.51674	1	1
3	REGULATION OF CATABOLIC PROCESS	3.3801e-28	0.49092	0.51046	1	1
3	KEGG GLYCOSPHINGOLIPID BIOSYNTHESIS GANGLIO SERIES	2.9148e-26	0.48852	0.52662	1	1
3	RHYTHMIC PROCESS	1.5184e-26	0.48832	0.47435	1	1
3	CELL RECOGNITION	3.6623e-20	0.48494	0.48802	1	1
3	REACTOME PLATELET HOMEOSTASIS	2.9659e-28	0.48473	0.50958	1	1
3	NEGATIVE REGULATION OF MYELOID CELL DIFFERENTIATION	7.4936e-18	0.48356	0.54352	1	1
3	KEGG MELANOGENESIS	3.5556e-29	0.48278	0.48098	1	1
3	CELLULAR MONOVALENT INORGANIC CATION HOMEOSTASIS	2.8361e-19	0.48193	0.50432	1	1
3	REACTOME NETRIN1 SIGNALING	4.0139e-24	0.48082	0.50231	1	1
3	KEGG HYPERTROPHIC CARDIOMYOPATHY HCM	3.3279e-23	0.47938	0.47225	1	1
3	NUCLEOTIDE KINASE ACTIVITY	6.3727e-27	0.47923	0.50469	1	1
3	CYCLASE ACTIVITY	6.8902e-24	0.4782	0.49204	1	1
3	POSITIVE REGULATION OF CYTOKINE SECRETION	3.8478e-12	0.47746	0.44533	1	1
3	KEGG ARRHYTHMOGENIC RIGHT VENTRICULAR CARDIOMYOPATHY ARVC	2.8458e-21	0.47721	0.47104	1	1
3	PID RHODOPSIN PATHWAY	7.5137e-19	0.47712	0.44474	1	1
3	PID RAC1 REG PATHWAY	1.8009e-25	0.47593	0.47949	1	1
3	REACTOME KERATAN SULFATE BIOSYNTHESIS	5.3132e-17	0.47514	0.46301	1	1
3	DEVELOPMENTAL GROWTH	4.2974e-21	0.47314	0.49184	1	1
3	ST MYOCYTE AD PATHWAY	9.1847e-25	0.47289	0.4968	1	1
3	REACTOME SYNTHESIS OF VERY LONG CHAIN FATTY ACYL COAS	1.2183e-17	0.4708	0.47726	1	1
3	CALCIUM ION BINDING	8.6694e-27	0.46962	0.48437	1	1
3	NEGATIVE REGULATION OF MAP KINASE ACTIVITY	1.4356e-24	0.46757	0.48401	1	1
3	COATED VESICLE	1.665e-30	0.46713	0.46934	1	1
3	HYDROGEN ION TRANSMEMBRANE TRANSPORTER ACTIVITY	2.8812e-24	0.46666	0.44325	1	1
3	TRANSMEMBRANE RECEPTOR ACTIVITY	1.621e-24	0.46406	0.45297	1	1
3	PHOSPHATE TRANSMEMBRANE TRANSPORTER ACTIVITY	1.0171e-21	0.46394	0.49174	1	1
3	PROTEIN TYROSINE PHOSPHATASE ACTIVITY	3.552e-25	0.46374	0.47663	1	1
3	REGULATION OF SECRETION	2.1466e-18	0.46229	0.46325	1	1
3	REACTOME REVERSIBLE HYDRATION OF CARBON DIOXIDE	3.4427e-12	0.46147	0.43693	1	1
3	GLUTAMINE FAMILY AMINO ACID METABOLIC PROCESS	4.2178e-21	0.46012	0.49924	1	1
3	CELLULAR RESPONSE TO STRESS	9.9371e-15	0.45924	0.38786	1	1
3	REACTOME RECYCLING PATHWAY OF L1	2.4922e-27	0.45764	0.45875	1	1
3	REACTOME GASTRIN CREB SIGNALLING PATHWAY VIA PKC AND MAPK	7.7972e-27	0.4548	0.46502	1	1
3	BODY FLUID SECRETION	1.0446e-18	0.4524	0.49826	1	1
3	RESPONSE TO NUTRIENT	4.5878e-21	0.45229	0.4809	1	1
3	RESPONSE TO NUTRIENT LEVELS	1.7793e-22	0.44921	0.47159	1	1
3	REACTOME ADENYLATE CYCLASE INHIBITORY PATHWAY	2.4048e-23	0.44527	0.46496	1	1
3	BRAIN DEVELOPMENT	5.6093e-27	0.44507	0.47647	1	1
3	KEGG ARGININE AND PROLINE METABOLISM	1.2584e-24	0.44423	0.43739	1	1
3	APICAL PART OF CELL	3.6733e-15	0.44159	0.42012	1	1
3	SENSORY PERCEPTION	1.7598e-26	0.4403	0.43087	1	1
3	KEGG GNRH SIGNALING PATHWAY	5.4503e-30	0.44019	0.4363	1	1
3	REACTOME DOWNSTREAM SIGNALING OF ACTIVATED FGFR	6.3992e-31	0.43853	0.43884	1	1
3	EPIDERMIS DEVELOPMENT	1.6903e-16	0.43839	0.38764	1	1
3	KEGG VASCULAR SMOOTH MUSCLE CONTRACTION	4.3907e-27	0.4351	0.4439	1	1
3	REACTOME PEPTIDE LIGAND BINDING RECEPTORS	1.6119e-17	0.43308	0.44912	1	1
3	REACTOME SEMA3A PAK DEPENDENT AXON REPULSION	4.09e-23	0.43211	0.42277	1	1
3	REACTOME ERK MAPK TARGETS	1.3519e-26	0.43155	0.43836	1	1
3	REACTOME DSCAM INTERACTIONS	6.2641e-20	0.42806	0.50373	1	1
3	BIOCARTA BAD PATHWAY	5.8142e-24	0.42711	0.43732	1	1
3	TISSUE MORPHOGENESIS	6.5425e-15	0.42629	0.38723	1	1
3	PID PI3KPLCTRKPATHWAY	1.0446e-29	0.42565	0.47097	1	1
3	AMINE TRANSMEMBRANE TRANSPORTER ACTIVITY	1.1112e-23	0.41821	0.43382	1	1
3	PEPTIDE BINDING	6.1121e-24	0.41763	0.39404	1	1
3	REACTOME TRANSMEMBRANE TRANSPORT OF SMALL MOLECULES	5.1644e-28	0.41609	0.42987	1	1
3	DETECTION OF STIMULUS	2.2894e-26	0.41521	0.41688	1	1
3	GTPASE ACTIVATOR ACTIVITY	4.3492e-24	0.41492	0.40624	1	1
3	EXCRETION	2.9434e-14	0.41451	0.36421	1	1
3	NEGATIVE REGULATION OF CATALYTIC ACTIVITY	5.7299e-27	0.41438	0.422	1	1
3	KEGG PHENYLALANINE METABOLISM	2.334e-08	0.41368	0.31029	1	1
3	ANION TRANSMEMBRANE TRANSPORTER ACTIVITY	4.2574e-21	0.41305	0.42855	1	1
3	POSITIVE REGULATION OF SECRETION	2.1639e-11	0.4126	0.4417	1	1
3	MAPKKK CASCADE GO 0000165	1.6806e-28	0.41101	0.42229	1	1
3	REACTOME NGF SIGNALLING VIA TRKA FROM THE PLASMA MEMBRANE	3.3701e-31	0.41055	0.41122	1	1
3	BIOCARTA CCR3 PATHWAY	1.145e-28	0.40984	0.43041	1	1
3	REACTOME STRIATED MUSCLE CONTRACTION	6.9399e-16	0.40954	0.41245	1	1
3	SPERM MOTILITY	3.5879e-15	0.40945	0.42115	1	1
3	SIG CD40PATHWAYMAP	2.9446e-29	0.40722	0.41058	1	1
3	MONOVALENT INORGANIC CATION HOMEOSTASIS	4.4226e-19	0.40484	0.41111	1	1
3	REACTOME AXON GUIDANCE	7.2671e-25	0.40414	0.39396	1	1
3	REACTOME FGFR1 LIGAND BINDING AND ACTIVATION	2.7841e-20	0.40226	0.43595	1	1
3	CARBOXYLIC ACID TRANSMEMBRANE TRANSPORTER ACTIVITY	5.9334e-23	0.40126	0.40838	1	1
3	REACTOME SHC MEDIATED CASCADE	2.6582e-24	0.40097	0.41049	1	1
3	POSITIVE REGULATION OF PROTEIN SECRETION	7.1861e-10	0.39744	0.37511	1	1
3	REACTOME ZINC TRANSPORTERS	3.918e-22	0.39721	0.40248	1	1
3	CELL SURFACE RECEPTOR LINKED SIGNAL TRANSDUCTION GO 0007166	4.5892e-25	0.39706	0.39533	1	1
3	BIOCARTA RAC1 PATHWAY	1.6359e-23	0.39574	0.40187	1	1
3	AMINE TRANSPORT	1.2457e-24	0.39415	0.41741	1	1
3	ST DIFFERENTIATION PATHWAY IN PC12 CELLS	1.3419e-23	0.39389	0.40737	1	1
3	ORGANIC ACID TRANSMEMBRANE TRANSPORTER ACTIVITY	1.3309e-22	0.3931	0.39543	1	1
3	BIOCARTA NFAT PATHWAY	1.1003e-23	0.39278	0.37116	1	1
3	REGULATION OF NEURON APOPTOSIS	6.7366e-23	0.39236	0.40315	1	1
3	REACTOME SIGNALING BY ERBB2	3.7588e-30	0.39115	0.3821	1	1
3	REACTOME SYNTHESIS SECRETION AND INACTIVATION OF GLP1	1.4347e-25	0.39042	0.39423	1	1
3	REACTOME SIGNALING BY FGFR	1.8231e-30	0.38986	0.384	1	1
3	RECEPTOR SIGNALING PROTEIN SERINE THREONINE KINASE ACTIVITY	1.3071e-25	0.38967	0.40008	1	1
3	TRANSITION METAL ION TRANSMEMBRANE TRANSPORTER ACTIVITY	1.7663e-19	0.38898	0.40944	1	1
3	PID EPHBFWDPATHWAY	7.2171e-30	0.38846	0.39547	1	1
3	DETECTION OF STIMULUS INVOLVED IN SENSORY PERCEPTION	2.5305e-25	0.38693	0.42355	1	1
3	PID LIS1PATHWAY	1.1784e-26	0.38665	0.39041	1	1
3	NEGATIVE REGULATION OF MULTICELLULAR ORGANISMAL PROCESS	4.5578e-20	0.38497	0.43116	1	1
3	REGULATION OF BLOOD PRESSURE	1.0583e-19	0.38481	0.39418	1	1
3	REACTOME ADP SIGNALLING THROUGH P2RY1	3.2338e-22	0.38444	0.36728	1	1
3	REACTOME SIGNALING BY ACTIVATED POINT MUTANTS OF FGFR1	5.0079e-18	0.38286	0.40533	1	1
3	ANION CATION SYMPORTER ACTIVITY	2.6885e-19	0.38217	0.41652	1	1
3	REACTOME O LINKED GLYCOSYLATION OF MUCINS	1.4243e-22	0.38121	0.38144	1	1
3	BIOCARTA FMLP PATHWAY	3.5634e-20	0.38111	0.36526	1	1
3	CORTICAL ACTIN CYTOSKELETON	4.0323e-22	0.38081	0.40405	1	1
3	PROTEIN AMINO ACID DEPHOSPHORYLATION	1.0917e-24	0.38062	0.39613	1	1
3	REACTOME APOPTOTIC CLEAVAGE OF CELL ADHESION PROTEINS	9.9342e-11	0.37867	0.4012	1	1
3	RECEPTOR ACTIVITY	3.0107e-21	0.37803	0.37526	1	1
3	REACTOME FRS2 MEDIATED CASCADE	3.2914e-27	0.37791	0.38932	1	1
3	ESTABLISHMENT AND OR MAINTENANCE OF CELL POLARITY	1.2611e-18	0.3776	0.38552	1	1
3	SECONDARY ACTIVE TRANSMEMBRANE TRANSPORTER ACTIVITY	2.7067e-23	0.37745	0.36933	1	1
3	REACTOME NRAGE SIGNALS DEATH THROUGH JNK	1.1075e-25	0.37672	0.37864	1	1
3	REACTOME REGULATION OF PYRUVATE DEHYDROGENASE PDH COMPLEX	2.806e-21	0.3767	0.41102	1	1
3	REACTOME TRIGLYCERIDE BIOSYNTHESIS	4.8075e-24	0.37661	0.37791	1	1
3	REGULATION OF ANATOMICAL STRUCTURE MORPHOGENESIS	2.9695e-24	0.37605	0.36821	1	1
3	INTRINSIC TO PLASMA MEMBRANE	3.6673e-24	0.37462	0.4058	1	1
3	BIOCARTA MAL PATHWAY	1.296e-26	0.37381	0.34423	1	1
3	LIGAND DEPENDENT NUCLEAR RECEPTOR ACTIVITY	6.821e-22	0.37343	0.38989	1	1
3	SA PTEN PATHWAY	2.5567e-25	0.36965	0.34904	1	1
3	REACTOME TRANSPORT OF GLUCOSE AND OTHER SUGARS BILE SALTS AND ORGANIC ACIDS METAL IONS AND AMINE COMPOUNDS	9.5834e-20	0.36913	0.3892	1	1
3	KEGG TASTE TRANSDUCTION	7.836e-23	0.369	0.3749	1	1
3	INTEGRAL TO PLASMA MEMBRANE	1.1678e-23	0.36897	0.39995	1	1
3	REACTOME CELL CELL JUNCTION ORGANIZATION	1.8009e-25	0.36771	0.35871	1	1
3	KEGG CIRCADIAN RHYTHM MAMMAL	6.0199e-17	0.36723	0.36715	1	1
3	REACTOME NCAM1 INTERACTIONS	3.3145e-07	0.3656	0.28882	1	1
3	MICROTUBULE ASSOCIATED COMPLEX	3.4834e-26	0.36457	0.35791	1	1
3	REACTOME GLUCONEOGENESIS	1.5998e-22	0.36396	0.3539	1	1
3	BIOCARTA SHH PATHWAY	1.2071e-18	0.36353	0.36975	1	1
3	REACTOME NCAM SIGNALING FOR NEURITE OUT GROWTH	2.1377e-13	0.36068	0.31853	1	1
3	EXTRINSIC TO MEMBRANE	1.0394e-19	0.35973	0.40228	1	1
3	KINASE ACTIVATOR ACTIVITY	2.8615e-19	0.35965	0.43971	1	1
3	REACTOME THROMBOXANE SIGNALLING THROUGH TP RECEPTOR	5.666e-19	0.35734	0.32876	1	1
3	PLASMA MEMBRANE PART	6.5547e-24	0.35729	0.38649	1	1
3	CARBOXYLIC ACID TRANSPORT	7.5863e-21	0.35575	0.35268	1	1
3	POSITIVE REGULATION OF DNA METABOLIC PROCESS	1.6203e-11	0.35575	0.37769	1	1
3	REACTOME PROSTACYCLIN SIGNALLING THROUGH PROSTACYCLIN RECEPTOR	1.5699e-16	0.35566	0.33273	1	1
3	ACTIVE TRANSMEMBRANE TRANSPORTER ACTIVITY	1.2157e-25	0.3556	0.36012	1	1
3	REACTOME KERATAN SULFATE KERATIN METABOLISM	2.2502e-13	0.35484	0.34598	1	1
3	KEGG TYROSINE METABOLISM	6.4415e-14	0.35478	0.302	1	1
3	OXYGEN AND REACTIVE OXYGEN SPECIES METABOLIC PROCESS	3.7277e-16	0.35285	0.33496	1	1
3	REACTOME SYNTHESIS OF PE	4.0752e-16	0.35259	0.2971	1	1
3	KEGG BETA ALANINE METABOLISM	6.7563e-22	0.35189	0.38559	1	1
3	CYTOKINE SECRETION	3.2883e-10	0.35189	0.30522	1	1
3	ORGANIC ACID TRANSPORT	1.7922e-20	0.35176	0.34013	1	1
3	KEGG MAPK SIGNALING PATHWAY	1.0088e-25	0.35172	0.35372	1	1
3	BIOCARTA CALCINEURIN PATHWAY	4.8791e-23	0.35148	0.37127	1	1
3	REACTOME SIGNALING BY GPCR	5.1086e-28	0.35017	0.35743	1	1
3	HOMOPHILIC CELL ADHESION	4.5613e-14	0.34985	0.36471	1	1
3	FOCAL ADHESION FORMATION	3.0508e-20	0.34974	0.37094	1	1
3	MICROTUBULE POLYMERIZATION OR DEPOLYMERIZATION	1.3155e-23	0.34956	0.38283	1	1
3	REACTOME SYNTHESIS OF BILE ACIDS AND BILE SALTS	9.0111e-14	0.34949	0.3547	1	1
3	REGULATION OF PROTEIN SECRETION	7.3611e-12	0.34873	0.31495	1	1
3	ST GRANULE CELL SURVIVAL PATHWAY	7.4317e-22	0.34845	0.3444	1	1
3	REACTOME NEGATIVE REGULATION OF FGFR SIGNALING	1.1369e-24	0.34807	0.34889	1	1
3	G PROTEIN SIGNALING COUPLED TO IP3 SECOND MESSENGERPHOSPHOLIPASE C ACTIVATING	3.935e-18	0.3472	0.38608	1	1
3	REACTOME SIGNAL TRANSDUCTION BY L1	2.6539e-23	0.34649	0.35355	1	1
3	KEGG PYRUVATE METABOLISM	1.2643e-23	0.3464	0.33652	1	1
3	RESPONSE TO EXTRACELLULAR STIMULUS	2.5642e-17	0.34629	0.35794	1	1
3	REACTOME GAP JUNCTION DEGRADATION	6.1417e-22	0.34473	0.3547	1	1
3	KEGG ERBB SIGNALING PATHWAY	5.5174e-26	0.34417	0.35083	1	1
3	HETEROPHILIC CELL ADHESION	6.6371e-14	0.34414	0.33037	1	1
3	GLYCOLIPID METABOLIC PROCESS	1.2679e-22	0.34392	0.35997	1	1
3	DYSTROPHIN ASSOCIATED GLYCOPROTEIN COMPLEX	4.2947e-14	0.3439	0.3189	1	1
3	REGULATION OF MEMBRANE POTENTIAL	1.4375e-14	0.34297	0.33428	1	1
3	INTEGRAL TO GOLGI MEMBRANE	1.1583e-15	0.34291	0.30575	1	1
3	ANION TRANSPORT	4.1961e-15	0.34128	0.40724	1	1
3	REACTOME GPCR DOWNSTREAM SIGNALING	3.3801e-28	0.34068	0.34563	1	1
3	PHOSPHOINOSITIDE MEDIATED SIGNALING	1.2889e-16	0.3401	0.37641	1	1
3	PID ERBB NETWORK PATHWAY	4.8701e-12	0.33946	0.33609	1	1
3	PID EPHA FWDPATHWAY	1.8647e-14	0.33939	0.37128	1	1
3	PID CONE PATHWAY	5.9942e-13	0.33856	0.31046	1	1
3	BIOCARTA RAB PATHWAY	7.4927e-25	0.33844	0.33691	1	1
3	PHOSPHORIC ESTER HYDROLASE ACTIVITY	5.004e-24	0.33816	0.35456	1	1
3	REGULATION OF LIPID METABOLIC PROCESS	6.8203e-18	0.3381	0.30831	1	1
3	KEGG INOSITOL PHOSPHATE METABOLISM	2.8925e-25	0.33695	0.33341	1	1
3	REACTOME CYTOSOLIC SULFONATION OF SMALL MOLECULES	3.5565e-14	0.33694	0.34909	1	1
3	REACTOME ACYL CHAIN REMODELLING OF PG	5.3805e-13	0.33659	0.31319	1	1
[truncated: 629 more rows]

## Sheet: THCA thyroid
archetype #	Feature Name	P value (Mann-Whitney)	Median Difference	Mean Difference	Significant after Benjamini-Hochberg correction?	Is first bin maximal?
1	REACTOME AMINE DERIVED HORMONES	3.3038e-16	1.0804	0.91005	1	1
1	PID VEGF VEGFR PATHWAY	4.811e-15	0.6578	0.67553	1	1
1	IONOTROPIC GLUTAMATE RECEPTOR ACTIVITY	4.4079e-08	0.59825	0.45782	1	1
1	PROTEIN STABILIZATION	2.3617e-20	0.5735	0.54451	1	1
1	AMINO ACID CATABOLIC PROCESS	5.7565e-21	0.57204	0.50837	1	1
1	GLUCAN METABOLIC PROCESS	3.155e-16	0.53975	0.56797	1	1
1	L AMINO ACID TRANSMEMBRANE TRANSPORTER ACTIVITY	2.012e-13	0.5345	0.49248	1	1
1	KEGG LIMONENE AND PINENE DEGRADATION	1.3539e-23	0.50022	0.52367	1	1
1	AMINE CATABOLIC PROCESS	6.7096e-20	0.49844	0.45822	1	1
1	KEGG VALINE LEUCINE AND ISOLEUCINE DEGRADATION	4.0699e-21	0.48586	0.47742	1	1
1	PHOTORECEPTOR CELL MAINTENANCE	2.6675e-11	0.48368	0.44394	1	1
1	KEGG BUTANOATE METABOLISM	2.0863e-21	0.47648	0.46706	1	1
1	REACTOME BRANCHED CHAIN AMINO ACID CATABOLISM	1.7007e-21	0.46864	0.50797	1	1
1	KEGG PROPANOATE METABOLISM	5.2792e-21	0.46646	0.48728	1	1
1	CARBOHYDRATE KINASE ACTIVITY	1.2826e-17	0.44116	0.36493	1	1
1	MICROTUBULE BASED MOVEMENT	2.3887e-11	0.43916	0.38448	1	1
1	GLUCOSE CATABOLIC PROCESS	4.6339e-20	0.43518	0.40915	1	1
1	ALDO KETO REDUCTASE ACTIVITY	2.3786e-09	0.43418	0.3928	1	1
1	ANTIOXIDANT ACTIVITY	5.5159e-15	0.43287	0.35388	1	1
1	NITROGEN COMPOUND CATABOLIC PROCESS	9.6361e-19	0.42379	0.41429	1	1
1	OXIDOREDUCTASE ACTIVITY ACTING ON PEROXIDE AS ACCEPTOR	1.3363e-10	0.41729	0.32941	1	1
1	KEGG TERPENOID BACKBONE BIOSYNTHESIS	8.4122e-22	0.41064	0.41725	1	1
1	COENZYME BIOSYNTHETIC PROCESS	3.1153e-18	0.41029	0.38168	1	1
1	COFACTOR CATABOLIC PROCESS	1.1906e-13	0.40191	0.47375	1	1
1	REACTOME FORMATION OF ATP BY CHEMIOSMOTIC COUPLING	2.2529e-10	0.39633	0.42096	1	1
1	REACTOME ACTIVATION OF CHAPERONES BY ATF6 ALPHA	4.6092e-18	0.38636	0.3684	1	1
1	MONOVALENT INORGANIC CATION TRANSMEMBRANE TRANSPORTER ACTIVITY	1.5608e-16	0.37999	0.35189	1	1
1	REACTOME CITRIC ACID CYCLE TCA CYCLE	1.056e-16	0.37141	0.45069	1	1
1	REACTOME VEGF LIGAND RECEPTOR INTERACTIONS	9.4848e-10	0.37128	0.42719	1	1
1	FATTY ACID OXIDATION	1.4021e-18	0.34808	0.33999	1	1
1	KEGG ASCORBATE AND ALDARATE METABOLISM	1.8481e-19	0.34445	0.325	1	1
1	GLUCOSE METABOLIC PROCESS	2.3671e-21	0.32757	0.30364	1	1
1	BIOCARTA ETC PATHWAY	2.847e-13	0.3273	0.37695	1	1
1	REACTOME RESPIRATORY ELECTRON TRANSPORT	7.509e-08	0.32624	0.32672	1	1
1	REACTOME IONOTROPIC ACTIVITY OF KAINATE RECEPTORS	7.8699e-09	0.32543	0.31175	1	1
1	MITOCHONDRIAL MATRIX	2.7147e-12	0.32494	0.25652	1	1
1	MITOCHONDRIAL LUMEN	2.7147e-12	0.32494	0.25652	1	1
1	COFACTOR BIOSYNTHETIC PROCESS	2.8496e-23	0.32282	0.31552	1	1
1	HYDROGEN ION TRANSMEMBRANE TRANSPORTER ACTIVITY	1.2656e-13	0.32252	0.3144	1	1
1	KEGG BETA ALANINE METABOLISM	4.6806e-17	0.31981	0.33559	1	1
1	CELLULAR RESPIRATION	6.0252e-15	0.31667	0.41432	1	1
1	PIGMENT BIOSYNTHETIC PROCESS	8.1872e-16	0.31648	0.30442	1	1
1	REACTOME ETHANOL OXIDATION	6.9833e-05	0.31413	0.23972	1	1
1	PID ALK2PATHWAY	1.3871e-15	0.31247	0.31333	1	1
1	KEGG LYSINE DEGRADATION	3.3013e-24	0.30251	0.31919	1	1
1	PROTON TRANSPORTING TWO SECTOR ATPASE COMPLEX	1.7547e-08	0.29433	0.28643	1	1
1	REACTOME MITOCHONDRIAL PROTEIN IMPORT	2.6952e-12	0.29212	0.27729	1	1
1	REACTOME HORMONE SENSITIVE LIPASE HSL MEDIATED TRIACYLGLYCEROL HYDROLYSIS	7.5142e-11	0.29134	0.35191	1	1
1	ENERGY DERIVATION BY OXIDATION OF ORGANIC COMPOUNDS	3.4742e-16	0.28794	0.30006	1	1
1	REACTOME TCA CYCLE AND RESPIRATORY ELECTRON TRANSPORT	8.013e-09	0.28464	0.27265	1	1
1	NUCLEAR SPECK	1.4695e-11	0.283	0.22698	1	1
1	MITOCHONDRIAL INNER MEMBRANE	9.3949e-10	0.28103	0.26221	1	1
1	REACTOME RESPIRATORY ELECTRON TRANSPORT ATP SYNTHESIS BY CHEMIOSMOTIC COUPLING AND HEAT PRODUCTION BY UNCOUPLING PROTEINS	8.6876e-08	0.28097	0.31644	1	1
1	REACTOME N GLYCAN TRIMMING IN THE ER AND CALNEXIN CALRETICULIN CYCLE	3.0463e-13	0.27592	0.20917	1	1
1	GLUTATHIONE TRANSFERASE ACTIVITY	0.0098736	0.27524	0.17774	1	1
1	REGULATION OF CHROMOSOME ORGANIZATION AND BIOGENESIS	7.0511e-18	0.27386	0.2779	1	1
1	REACTOME REGULATION OF GENE EXPRESSION IN BETA CELLS	1.586e-09	0.27363	0.27708	1	1
1	REGULATION OF PROTEIN STABILITY	7.0162e-15	0.27329	0.25396	1	1
1	HEME BIOSYNTHETIC PROCESS	2.0631e-16	0.27201	0.25644	1	1
1	PIGMENT METABOLIC PROCESS	1.7635e-14	0.27056	0.2647	1	1
1	MITOCHONDRIAL PART	2.276e-11	0.26922	0.24484	1	1
1	MITOCHONDRIAL SMALL RIBOSOMAL SUBUNIT	4.3569e-07	0.26651	0.21785	1	1
1	ORGANELLAR SMALL RIBOSOMAL SUBUNIT	4.3569e-07	0.26651	0.21785	1	1
1	SMALL RIBOSOMAL SUBUNIT	4.3569e-07	0.26651	0.21785	1	1
1	ORGANELLE INNER MEMBRANE	1.516e-10	0.26448	0.24533	1	1
1	NUCLEOTIDE SUGAR METABOLIC PROCESS	6.1993e-08	0.25888	0.26626	1	1
1	CELLULAR CARBOHYDRATE CATABOLIC PROCESS	3.0972e-07	0.25462	0.21786	1	1
1	MITOCHONDRIAL MEMBRANE PART	3.9909e-09	0.24962	0.26857	1	1
1	MITOCHONDRIAL RESPIRATORY CHAIN	6.6893e-09	0.24584	0.29411	1	1
1	HETEROCYCLE METABOLIC PROCESS	1.1162e-10	0.24582	0.20665	1	1
1	REACTOME ACTIVATED AMPK STIMULATES FATTY ACID OXIDATION IN MUSCLE	2.4473e-18	0.24051	0.23303	1	1
1	CARBOHYDRATE CATABOLIC PROCESS	4.8432e-07	0.24038	0.20635	1	1
1	KEGG OXIDATIVE PHOSPHORYLATION	2.5794e-07	0.2362	0.25277	1	1
1	MITOCHONDRIAL MEMBRANE	2.2827e-10	0.22851	0.23382	1	1
1	COENZYME BINDING	1.1198e-08	0.22791	0.21889	1	1
1	KEGG PROTEIN EXPORT	2.8348e-12	0.22259	0.23896	1	1
1	REACTOME SYNTHESIS OF GLYCOSYLPHOSPHATIDYLINOSITOL GPI	5.8857e-20	0.21891	0.23225	1	1
1	BIOCARTA NO1 PATHWAY	6.415e-06	0.21826	0.24015	1	1
1	GLUTAMINE FAMILY AMINO ACID METABOLIC PROCESS	1.0511e-10	0.21573	0.23456	1	1
1	ORGANELLAR RIBOSOME	0.00010329	0.2114	0.17974	1	1
1	MITOCHONDRIAL RIBOSOME	0.00010329	0.2114	0.17974	1	1
1	TRNA PROCESSING	1.1186e-11	0.21091	0.1957	1	1
1	LIPOPROTEIN BIOSYNTHETIC PROCESS	2.0543e-15	0.20755	0.19812	1	1
1	SECONDARY METABOLIC PROCESS	2.7939e-09	0.20661	0.20513	1	1
1	MITOCHONDRIAL TRANSPORT	1.5299e-14	0.20613	0.22745	1	1
1	TRANSFERASE ACTIVITY TRANSFERRING ALKYL OR ARYLOTHER THAN METHYLGROUPS	6.6328e-06	0.20439	0.18438	1	1
1	REACTOME VITAMIN B5 PANTOTHENATE METABOLISM	2.1214e-13	0.2028	0.22061	1	1
1	REACTOME CALNEXIN CALRETICULIN CYCLE	1.2685e-08	0.20123	0.14884	1	1
1	HEME METABOLIC PROCESS	4.5642e-13	0.20118	0.1958	1	1
1	BIOCARTA AKAP95 PATHWAY	5.7442e-10	0.19889	0.20545	1	1
1	REACTOME REGULATION OF RHEB GTPASE ACTIVITY BY AMPK	1.8489e-14	0.19815	0.19267	1	1
1	BIOPOLYMER BIOSYNTHETIC PROCESS	1.5323e-05	0.19804	0.16209	1	1
1	DNA DIRECTED RNA POLYMERASE COMPLEX	4.674e-16	0.18519	0.17849	1	1
1	RNA POLYMERASE COMPLEX	4.6545e-16	0.18519	0.17849	1	1
1	NUCLEAR DNA DIRECTED RNA POLYMERASE COMPLEX	4.6545e-16	0.18519	0.17849	1	1
1	BIOCARTA GLYCOLYSIS PATHWAY	8.1683e-05	0.17891	0.13471	1	1
1	OXIDOREDUCTASE ACTIVITY ACTING ON THE ALDEHYDE OR OXO GROUP OF DONORS	0.0013956	0.17799	0.15586	1	1
1	KEGG PARKINSONS DISEASE	2.1561e-05	0.17613	0.18407	1	1
1	MITOCHONDRIAL MEMBRANE ORGANIZATION AND BIOGENESIS	8.1021e-15	0.1738	0.18669	1	1
1	DNA DIRECTED RNA POLYMERASEII CORE COMPLEX	2.631e-11	0.17367	0.18525	1	1
1	KEGG GLYCOSYLPHOSPHATIDYLINOSITOL GPI ANCHOR BIOSYNTHESIS	5.2678e-14	0.1713	0.15794	1	1
1	GLYCEROPHOSPHOLIPID BIOSYNTHETIC PROCESS	5.7813e-10	0.16329	0.14415	1	1
1	VITAMIN BINDING	0.00058289	0.15801	0.15516	1	1
1	COENZYME METABOLIC PROCESS	2.2924e-06	0.1576	0.18353	1	1
1	REACTOME SIGNALING BY NODAL	0.0015606	0.15267	0.1499	1	1
1	KEGG HUNTINGTONS DISEASE	5.2143e-07	0.15111	0.14753	1	1
1	CYTOSKELETON DEPENDENT INTRACELLULAR TRANSPORT	0.00089681	0.14793	0.11718	1	1
1	PID HDAC CLASSIII PATHWAY	1.4111e-08	0.14699	0.13178	1	1
1	REACTOME AKT PHOSPHORYLATES TARGETS IN THE CYTOSOL	1.3815e-10	0.14682	0.14255	1	1
1	PHOSPHOINOSITIDE METABOLIC PROCESS	4.1278e-15	0.14566	0.14444	1	1
1	MANNOSYLTRANSFERASE ACTIVITY	0.0014353	0.14526	0.10867	1	1
1	AMINO ACID AND DERIVATIVE METABOLIC PROCESS	2.0316e-08	0.14354	0.14888	1	1
1	PATTERN SPECIFICATION PROCESS	0.00018925	0.13966	0.12129	1	1
1	BIOCARTA VEGF PATHWAY	4.5598e-06	0.13539	0.12863	1	1
1	ESTABLISHMENT OF VESICLE LOCALIZATION	0.00044336	0.13512	0.13216	1	1
1	PROTEIN TARGETING TO MEMBRANE	2.1095e-10	0.1346	0.15032	1	1
1	MALE GONAD DEVELOPMENT	0.001588	0.1341	0.12916	1	1
1	TRANS GOLGI NETWORK TRANSPORT VESICLE	4.1985e-05	0.13366	0.13453	1	1
1	PROTEIN AMINO ACID LIPIDATION	4.1736e-14	0.13303	0.137	1	1
1	REACTOME GLUCURONIDATION	5.0468e-06	0.13196	0.102	1	1
1	REACTOME CHOLESTEROL BIOSYNTHESIS	2.9516e-06	0.13153	0.11583	1	1
1	DEVELOPMENT OF PRIMARY SEXUAL CHARACTERISTICS	4.9106e-05	0.12938	0.11546	1	1
1	PHOSPHOINOSITIDE BIOSYNTHETIC PROCESS	2.3744e-10	0.12703	0.1081	1	1
1	OXIDOREDUCTASE ACTIVITY ACTING ON SULFUR GROUP OF DONORS	3.0402e-06	0.12437	0.13188	1	1
1	TRNA METABOLIC PROCESS	8.8298e-05	0.12387	0.095353	1	1
1	GENE SILENCING	3.9598e-07	0.12364	0.11347	1	1
1	BIOCARTA LEPTIN PATHWAY	0.0022064	0.12246	0.098424	1	1
1	RIBOSOMAL SUBUNIT	0.0030488	0.1215	0.13038	1	1
1	REACTOME SIGNALING BY NOTCH4	0.005528	0.12034	0.10779	1	1
1	PROTEIN AMINO ACID ADP RIBOSYLATION	5.0399e-05	0.1166	0.091733	1	1
1	ER TO GOLGI VESICLE MEDIATED TRANSPORT	6.1449e-10	0.11377	0.12192	1	1
1	BIOCARTA EIF2 PATHWAY	0.00036252	0.10928	0.082104	1	1
1	REGULATION OF TRANSLATIONAL INITIATION	1.3108e-06	0.10523	0.085614	1	1
1	KEGG SELENOAMINO ACID METABOLISM	0.0010815	0.10375	0.10058	1	1
1	REACTOME SYNTHESIS OF PIPS AT THE EARLY ENDOSOME MEMBRANE	0.0016612	0.10215	0.11931	1	1
1	REACTOME BIOSYNTHESIS OF THE N GLYCAN PRECURSOR DOLICHOL LIPID LINKED OLIGOSACCHARIDE LLO AND TRANSFER TO A NASCENT PROTEIN	1.1954e-08	0.10116	0.11985	1	1
1	REACTOME REGULATION OF AMPK ACTIVITY VIA LKB1	3.6363e-07	0.10015	0.09347	1	1
1	PERINUCLEAR REGION OF CYTOPLASM	1.4554e-07	0.098464	0.083188	1	1
1	U12 DEPENDENT SPLICEOSOME	8.5669e-08	0.096464	0.10339	1	1
1	REACTOME COPI MEDIATED TRANSPORT	8.7715e-06	0.095155	0.088896	1	1
1	BIOCARTA CARM1 PATHWAY	0.010437	0.093554	0.097559	1	1
1	RIBONUCLEOPROTEIN BINDING	2.3701e-05	0.091888	0.090502	1	1
1	GENERAL RNA POLYMERASE II TRANSCRIPTION FACTOR ACTIVITY	6.0395e-05	0.088598	0.096551	1	1
1	RESPONSE TO NUTRIENT	0.049779	0.086209	0.074496	1	1
1	PID LIS1PATHWAY	0.012269	0.085725	0.067682	1	1
1	INTRA GOLGI VESICLE MEDIATED TRANSPORT	2.0438e-06	0.084642	0.08046	1	1
1	TRANSCRIPTION FACTOR TFIID COMPLEX	8.2376e-08	0.083814	0.093025	1	1
1	REACTOME MITOCHONDRIAL TRNA AMINOACYLATION	6.4131e-08	0.083369	0.13784	1	1
1	REACTOME PPARA ACTIVATES GENE EXPRESSION	0.00054691	0.079331	0.066785	1	1
1	REACTOME ENERGY DEPENDENT REGULATION OF MTOR BY LKB1 AMPK	1.4706e-08	0.077909	0.099034	1	1
1	KEGG VALINE LEUCINE AND ISOLEUCINE BIOSYNTHESIS	0.0073976	0.076477	0.094141	1	1
1	TRANSCRIPTION FROM RNA POLYMERASE III PROMOTER	1.5275e-09	0.076166	0.091357	1	1
1	PROTEIN POLYUBIQUITINATION	0.00044084	0.075759	0.068395	1	1
1	LIGASE ACTIVITY FORMING CARBON OXYGEN BONDS	6.2902e-05	0.069936	0.10031	1	1
1	TRANSLATION FACTOR ACTIVITY NUCLEIC ACID BINDING	0.00028041	0.06952	0.070839	1	1
1	REACTOME RNA POL III TRANSCRIPTION INITIATION FROM TYPE 2 PROMOTER	3.1935e-06	0.069467	0.071194	1	1
1	RNA POLYMERASE II TRANSCRIPTION MEDIATOR ACTIVITY	0.011786	0.066527	0.074537	1	1
1	PID DNAPK PATHWAY	2.687e-05	0.065775	0.063096	1	1
1	KEGG AMINOACYL TRNA BIOSYNTHESIS	0.00024045	0.064548	0.1039	1	1
1	VESICLE MEMBRANE	0.02615	0.064533	0.038624	1	1
1	ACETYLTRANSFERASE ACTIVITY	0.021627	0.062919	0.078904	1	1
1	REACTOME FORMATION OF TRANSCRIPTION COUPLED NER TC NER REPAIR COMPLEX	1.0983e-05	0.062748	0.066939	1	1
1	PROTEIN FOLDING	0.0016901	0.062226	0.046304	1	1
1	KEGG NON HOMOLOGOUS END JOINING	2.2353e-05	0.061981	0.1082	1	1
1	GOLGI ASSOCIATED VESICLE	0.0099317	0.060883	0.05974	1	1
1	REACTOME POST TRANSLATIONAL MODIFICATION SYNTHESIS OF GPI ANCHORED PROTEINS	5.3542e-05	0.059962	0.074214	1	1
1	TRANSLATIONAL INITIATION	0.00066645	0.059109	0.056016	1	1
1	TRANSPORT VESICLE	0.011888	0.058891	0.062761	1	1
1	REACTOME RNA POL I TRANSCRIPTION INITIATION	0.0036833	0.058296	0.065006	1	1
1	REACTOME PKB MEDIATED EVENTS	8.8112e-05	0.056177	0.053689	1	1
1	BIOCARTA VDR PATHWAY	0.023733	0.055042	0.12285	1	1
1	TRANSCRIPTION ELONGATION REGULATOR ACTIVITY	0.00085234	0.052904	0.054273	1	1
1	COATED VESICLE MEMBRANE	0.0077166	0.051779	0.045139	1	1
1	GOLGI STACK	0.00024916	0.051631	0.061039	1	1
1	KEGG RNA DEGRADATION	0.00091984	0.048519	0.037695	1	1
1	REACTOME SYNTHESIS OF PIPS AT THE GOLGI MEMBRANE	0.0028448	0.047259	0.083983	1	1
1	REACTOME RNA POL II TRANSCRIPTION PRE INITIATION AND PROMOTER OPENING	0.0001746	0.046108	0.057564	1	1
1	REACTOME REGULATION OF HYPOXIA INDUCIBLE FACTOR HIF BY OXYGEN	0.046458	0.043622	0.039157	1	1
1	REACTOME MRNA CAPPING	0.011419	0.042678	0.036899	1	1
1	REACTOME MICRORNA MIRNA BIOGENESIS	0.0094202	0.0403	0.030092	1	1
1	PID MTOR 4PATHWAY	0.062223	0.039269	0.033288	1	1
1	PID RANBP2PATHWAY	0.025777	0.037864	0.071385	1	1
1	REACTOME REGULATORY RNA PATHWAYS	0.0029113	0.037712	0.045291	1	1
1	TRANSLATION REGULATOR ACTIVITY	0.052306	0.034964	0.037458	1	1
1	PROTEIN RNA COMPLEX ASSEMBLY	0.011854	0.034851	0.035721	1	1
1	DNA DIRECTED RNA POLYMERASEII HOLOENZYME	0.00026435	0.034004	0.044294	1	1
1	REACTOME RNA POL II PRE TRANSCRIPTION EVENTS	0.0016989	0.029321	0.033838	1	1
1	RIBONUCLEOPROTEIN COMPLEX BIOGENESIS AND ASSEMBLY	0.026492	0.027062	0.03148	1	1
1	KEGG BASAL TRANSCRIPTION FACTORS	0.039784	0.026019	0.063013	1	1
1	KEGG N GLYCAN BIOSYNTHESIS	0.067813	0.01904	0.042048	1	1
2	PID ERBB NETWORK PATHWAY	0.00036958	0.34568	0.2765	1	1
2	KEGG CIRCADIAN RHYTHM MAMMAL	2.6185e-12	0.31969	0.35673	1	1
2	SPHINGOID METABOLIC PROCESS	7.1202e-14	0.29425	0.3092	1	1
2	REACTOME SIGNALING BY HIPPO	1.2733e-16	0.2662	0.31879	1	1
2	INTEGRAL TO GOLGI MEMBRANE	1.249e-09	0.26061	0.26629	1	1
2	REACTOME CIRCADIAN REPRESSION OF EXPRESSION BY REV ERBA	1.3974e-13	0.25346	0.31168	1	1
2	REACTOME RORA ACTIVATES CIRCADIAN EXPRESSION	3.5132e-13	0.24295	0.30398	1	1
2	REACTOME BMAL1 CLOCK NPAS2 ACTIVATES CIRCADIAN EXPRESSION	4.8541e-12	0.22837	0.2775	1	1
2	PID SMAD2 3PATHWAY	1.7087e-14	0.20277	0.23239	1	1
2	REACTOME PURINE RIBONUCLEOSIDE MONOPHOSPHATE BIOSYNTHESIS	1.7224e-13	0.1978	0.19599	1	1
2	HISTONE ACETYLTRANSFERASE ACTIVITY	1.284e-10	0.18635	0.27025	1	1
2	PID CIRCADIANPATHWAY	2.2235e-10	0.18052	0.21678	1	1
2	REACTOME CIRCADIAN CLOCK	7.2164e-11	0.17698	0.20031	1	1
2	BIOCARTA VDR PATHWAY	4.911e-09	0.17672	0.25556	1	1
2	REACTOME SPHINGOLIPID DE NOVO BIOSYNTHESIS	2.1166e-06	0.1685	0.15406	1	1
2	BIOCARTA EGFR SMRTE PATHWAY	3.3743e-07	0.1663	0.214	1	1
2	REACTOME SYNTHESIS OF PIPS AT THE LATE ENDOSOME MEMBRANE	8.3966e-11	0.16352	0.21582	1	1
2	BIOCARTA SKP2E2F PATHWAY	0.00075271	0.16319	0.14849	1	1
2	N TERMINAL PROTEIN AMINO ACID MODIFICATION	2.7204e-15	0.16039	0.17168	1	1
2	EUKARYOTIC TRANSLATION INITIATION FACTOR 3 COMPLEX	1.0074e-09	0.159	0.2042	1	1
2	PID BARD1PATHWAY	2.3234e-08	0.15815	0.19001	1	1
2	LIPID KINASE ACTIVITY	2.8222e-05	0.15764	0.17221	1	1
2	REACTOME HOMOLOGOUS RECOMBINATION REPAIR OF REPLICATION INDEPENDENT DOUBLE STRAND BREAKS	3.139e-06	0.15015	0.19249	1	1
2	NUCLEOSOME ASSEMBLY	3.2092e-06	0.14698	0.14799	1	1
2	REACTOME SIGNALING BY FGFR1 FUSION MUTANTS	2.6251e-08	0.14688	0.18002	1	1
2	ACETYLGLUCOSAMINYLTRANSFERASE ACTIVITY	0.00052081	0.14567	0.13747	1	1
2	SPINDLE POLE	0.0031043	0.14526	0.16448	1	1
2	INTRINSIC TO GOLGI MEMBRANE	2.6428e-09	0.1407	0.1528	1	1
2	BIOCARTA MTOR PATHWAY	6.6428e-14	0.13623	0.13783	1	1
2	BIOCARTA EIF2 PATHWAY	7.4224e-10	0.13601	0.13543	1	1
2	REACTOME DOUBLE STRAND BREAK REPAIR	1.2585e-06	0.12979	0.18315	1	1
2	PROTEIN EXPORT FROM NUCLEUS	5.5985e-08	0.12925	0.19474	1	1
2	THYROID HORMONE RECEPTOR BINDING	2.5794e-07	0.12737	0.13776	1	1
2	POST GOLGI VESICLE MEDIATED TRANSPORT	3.8863e-08	0.12697	0.14113	1	1
2	PID WNT CANONICAL PATHWAY	1.5979e-07	0.1239	0.13997	1	1
2	REACTOME DOWNREGULATION OF ERBB2 ERBB3 SIGNALING	0.0024779	0.12259	0.091079	1	1
2	PROTEIN AMINO ACID AUTOPHOSPHORYLATION	0.00019939	0.12226	0.1643	1	1
2	REACTOME SYNTHESIS OF PIPS AT THE EARLY ENDOSOME MEMBRANE	1.6695e-07	0.12062	0.17533	1	1
2	NUCLEAR PORE	3.8914e-14	0.12026	0.13306	1	1
2	ANDROGEN RECEPTOR SIGNALING PATHWAY	2.5059e-08	0.11893	0.13694	1	1
2	BIOCARTA EIF PATHWAY	2.0374e-11	0.11866	0.14463	1	1
2	REACTOME REGULATION OF PYRUVATE DEHYDROGENASE PDH COMPLEX	3.0984e-05	0.11752	0.16676	1	1
2	BIOCARTA RARRXR PATHWAY	3.4207e-06	0.11255	0.18492	1	1
2	OXIDOREDUCTASE ACTIVITY GO 0016706	0.0058818	0.11235	0.10674	1	1
2	REACTOME DOWNREGULATION OF SMAD2 3 SMAD4 TRANSCRIPTIONAL ACTIVITY	7.1384e-08	0.11063	0.13275	1	1
2	BIOCARTA ATM PATHWAY	0.0046519	0.10745	0.10723	1	1
2	BIOCARTA ATRBRCA PATHWAY	0.0010176	0.10625	0.1081	1	1
2	REACTOME SIGNALING BY CONSTITUTIVELY ACTIVE EGFR	8.5673e-06	0.1046	0.11409	1	1
2	NUCLEAR EXPORT	2.0995e-07	0.10446	0.13218	1	1
2	NF KAPPAB BINDING	0.0032982	0.10309	0.11634	1	1
2	UBIQUITIN LIGASE COMPLEX	1.5872e-12	0.1027	0.12581	1	1
2	REACTOME VITAMIN B5 PANTOTHENATE METABOLISM	3.116e-06	0.10091	0.10416	1	1
2	NLS BEARING SUBSTRATE IMPORT INTO NUCLEUS	0.00067141	0.10073	0.12293	1	1
2	REACTOME GOLGI ASSOCIATED VESICLE BIOGENESIS	8.2145e-08	0.10068	0.095213	1	1
2	REACTOME INTERACTIONS OF VPR WITH HOST CELLULAR PROTEINS	1.6105e-12	0.099655	0.11857	1	1
2	TRANSLATION INITIATION FACTOR ACTIVITY	1.471e-09	0.099579	0.11739	1	1
2	REACTOME MTORC1 MEDIATED SIGNALLING	8.8771e-07	0.098859	0.10773	1	1
2	REACTOME PI3K EVENTS IN ERBB2 SIGNALING	0.00011364	0.096594	0.11102	1	1
2	REACTOME TRNA AMINOACYLATION	0.00028151	0.09562	0.11232	1	1
2	ENDOSOME TRANSPORT	1.1132e-06	0.095585	0.10611	1	1
2	INOSITOL OR PHOSPHATIDYLINOSITOL KINASE ACTIVITY	1.7418e-05	0.094169	0.16173	1	1
2	REACTOME DEADENYLATION OF MRNA	1.6476e-15	0.092626	0.12399	1	1
2	REACTOME TRANSCRIPTIONAL ACTIVITY OF SMAD2 SMAD3 SMAD4 HETEROTRIMER	0.0023209	0.091767	0.11365	1	1
2	REACTOME JNK C JUN KINASES PHOSPHORYLATION AND ACTIVATION MEDIATED BY ACTIVATED HUMAN TAK1	0.001588	0.091331	0.11773	1	1
2	CHROMATIN ASSEMBLY	0.00038705	0.0868	0.088831	1	1
2	REACTOME SYNTHESIS OF PIPS AT THE GOLGI MEMBRANE	6.649e-09	0.086626	0.11105	1	1
2	NUCLEOTIDE EXCISION REPAIR	1.1397e-09	0.086138	0.10027	1	1
2	REACTOME TRANSPORT OF RIBONUCLEOPROTEINS INTO THE HOST NUCLEUS	3.5371e-10	0.08588	0.13173	1	1
2	NUCLEAR HORMONE RECEPTOR BINDING	2.6541e-06	0.085495	0.10881	1	1
2	CHROMATIN ASSEMBLY OR DISASSEMBLY	4.3864e-06	0.084288	0.088983	1	1
2	RNA 3END PROCESSING	1.719e-08	0.082995	0.093584	1	1
2	REACTOME NEP NS2 INTERACTS WITH THE CELLULAR EXPORT MACHINERY	5.3805e-08	0.082565	0.11415	1	1
2	PEROXISOME ORGANIZATION AND BIOGENESIS	2.8728e-07	0.080906	0.10408	1	1
2	KEGG AMINOACYL TRNA BIOSYNTHESIS	0.00013511	0.080713	0.10831	1	1
2	NUCLEAR MEMBRANE	1.0203e-09	0.075615	0.1129	1	1
2	BIOCARTA IGF1MTOR PATHWAY	0.00026855	0.07489	0.081541	1	1
2	DOUBLE STRAND BREAK REPAIR	0.0026978	0.074111	0.070782	1	1
2	PROTEIN UBIQUITINATION	5.7319e-07	0.073795	0.084866	1	1
2	REACTOME TRANS GOLGI NETWORK VESICLE BUDDING	3.98e-06	0.073766	0.078607	1	1
2	LIGASE ACTIVITY	2.0957e-10	0.072545	0.092761	1	1
2	REACTOME ANTIVIRAL MECHANISM BY IFN STIMULATED GENES	6.3037e-05	0.072407	0.094646	1	1
2	BIOCARTA PITX2 PATHWAY	0.022629	0.07206	0.083471	1	1
2	NUCLEAR MEMBRANE PART	6.9987e-09	0.070836	0.088158	1	1
2	BIOCARTA PTEN PATHWAY	0.00033814	0.070072	0.097309	1	1
2	GOLGI STACK	5.1325e-07	0.069008	0.075394	1	1
2	CHROMATIN REMODELING	1.812e-06	0.068026	0.078249	1	1
2	REACTOME EGFR DOWNREGULATION	0.0021185	0.067263	0.074508	1	1
2	REACTOME TRANSPORT OF MATURE MRNA DERIVED FROM AN INTRONLESS TRANSCRIPT	5.8535e-07	0.067052	0.090215	1	1
2	TRANSLATION REGULATOR ACTIVITY	1.5734e-06	0.065954	0.081033	1	1
2	PROTEIN MODIFICATION BY SMALL PROTEIN CONJUGATION	5.6128e-07	0.064969	0.07863	1	1
2	RNA EXPORT FROM NUCLEUS	0.001036	0.064911	0.073559	1	1
2	REACTOME PI METABOLISM	0.0067125	0.064453	0.085864	1	1
2	BETA TUBULIN BINDING	0.0016612	0.064265	0.063926	1	1
2	REACTOME ASSOCIATION OF TRIC CCT WITH TARGET PROTEINS DURING BIOSYNTHESIS	2.2708e-13	0.063908	0.089582	1	1
2	N ACYLTRANSFERASE ACTIVITY	0.047923	0.063322	0.078498	1	1
2	PID ATM PATHWAY	0.0010854	0.062724	0.069775	1	1
2	RAS GTPASE BINDING	4.4291e-06	0.06171	0.093683	1	1
2	TRANSLATION FACTOR ACTIVITY NUCLEIC ACID BINDING	4.2193e-06	0.061458	0.080482	1	1
2	KEGG NON HOMOLOGOUS END JOINING	0.00066153	0.058877	0.065774	1	1
2	GENERAL RNA POLYMERASE II TRANSCRIPTION FACTOR ACTIVITY	0.00010095	0.058402	0.095326	1	1
2	RNA POLYMERASE II TRANSCRIPTION MEDIATOR ACTIVITY	0.027259	0.05825	0.071556	1	1
2	TRANSCRIPTION INITIATION	1.6137e-06	0.057883	0.081174	1	1
2	N ACETYLTRANSFERASE ACTIVITY	0.014996	0.054815	0.091369	1	1
2	NUCLEAR ENVELOPE	2.699e-05	0.052551	0.080324	1	1
2	REACTOME MITOCHONDRIAL TRNA AMINOACYLATION	0.0038165	0.051464	0.055595	1	1
2	REACTOME PYRUVATE METABOLISM	0.029373	0.050708	0.059262	1	1
2	REACTOME RECYCLING PATHWAY OF L1	0.066904	0.048298	0.062459	1	1
2	REACTOME TRANSPORT OF MATURE TRANSCRIPT TO CYTOPLASM	5.9879e-05	0.04795	0.063069	1	1
2	CELLULAR PROTEIN COMPLEX DISASSEMBLY	0.019686	0.047738	0.042934	1	1
2	SMALL PROTEIN CONJUGATING ENZYME ACTIVITY	6.6636e-05	0.047413	0.055793	1	1
2	PID RANBP2PATHWAY	0.0044218	0.046573	0.048018	1	1
2	GOLGI MEMBRANE	0.0024326	0.046272	0.052221	1	1
2	KINETOCHORE	0.028263	0.043534	0.084865	1	1
2	TRANSCRIPTION INITIATION FROM RNA POLYMERASE II PROMOTER	0.00016498	0.043284	0.061273	1	1
2	PROTEIN DNA COMPLEX ASSEMBLY	0.0035892	0.042368	0.053016	1	1
2	ACID AMINO ACID LIGASE ACTIVITY	0.00042759	0.041649	0.049681	1	1
2	PID P53REGULATIONPATHWAY	0.00035422	0.041472	0.054436	1	1
2	PROTEIN POLYUBIQUITINATION	6.8072e-05	0.041409	0.059702	1	1
2	REACTOME GAB1 SIGNALOSOME	0.0079044	0.041296	0.06493	1	1
2	SMALL CONJUGATING PROTEIN LIGASE ACTIVITY	6.9241e-05	0.040083	0.057458	1	1
2	KEGG BASAL TRANSCRIPTION FACTORS	0.0053334	0.03884	0.077424	1	1
2	UBIQUITIN PROTEIN LIGASE ACTIVITY	0.00047206	0.037583	0.0518	1	1
2	TRANSLATIONAL INITIATION	0.0044077	0.036496	0.049827	1	1
2	REACTOME CTNNB1 PHOSPHORYLATION CASCADE	0.0082675	0.036278	0.041639	1	1
2	REACTOME ENERGY DEPENDENT REGULATION OF MTOR BY LKB1 AMPK	0.0025323	0.035012	0.04735	1	1
2	NUCLEOBASENUCLEOSIDENUCLEOTIDE AND NUCLEIC ACID TRANSPORT	0.076294	0.033605	0.038101	1	1
2	LIGASE ACTIVITY FORMING CARBON NITROGEN BONDS	8.0575e-06	0.033025	0.066855	1	1
2	UBIQUITIN CYCLE	0.0044925	0.032423	0.049792	1	1
2	REACTOME PKB MEDIATED EVENTS	0.00064457	0.031387	0.040287	1	1
2	REACTOME PYRUVATE METABOLISM AND CITRIC ACID TCA CYCLE	0.064969	0.029029	0.011158	1	1
2	CELLULAR PROTEIN CATABOLIC PROCESS	0.0042969	0.026415	0.032258	1	1
2	PROTEIN RNA COMPLEX ASSEMBLY	0.0080238	0.026397	0.037079	1	1
2	KEGG UBIQUITIN MEDIATED PROTEOLYSIS	0.012878	0.023431	0.034129	1	1
3	STRUCTURAL CONSTITUENT OF RIBOSOME	2.7387e-24	0.7847	0.7987	1	1
3	KEGG RIBOSOME	1.6952e-23	0.77325	0.78147	1	1
3	REACTOME PEPTIDE CHAIN ELONGATION	1.4844e-23	0.75999	0.78531	1	1
3	REACTOME INFLUENZA VIRAL RNA TRANSCRIPTION AND REPLICATION	1.0697e-23	0.68649	0.69584	1	1
3	REACTOME SRP DEPENDENT COTRANSLATIONAL PROTEIN TARGETING TO MEMBRANE	4.0181e-22	0.61526	0.61749	1	1
3	REACTOME 3 UTR MEDIATED TRANSLATIONAL REGULATION	1.2087e-21	0.61208	0.61795	1	1
3	REACTOME NONSENSE MEDIATED DECAY ENHANCED BY THE EXON JUNCTION COMPLEX	8.1503e-23	0.58551	0.60751	1	1
3	REACTOME HDL MEDIATED LIPID TRANSPORT	1.4793e-08	0.57292	0.51197	1	1
3	ORGANELLAR RIBOSOME	8.0883e-22	0.56667	0.55408	1	1
3	MITOCHONDRIAL RIBOSOME	8.0883e-22	0.56667	0.55408	1	1
3	REACTOME FORMATION OF THE TERNARY COMPLEX AND SUBSEQUENTLY THE 43S COMPLEX	8.9467e-18	0.56105	0.54565	1	1
3	RIBOSOMAL SUBUNIT	9.0117e-23	0.5586	0.57913	1	1
3	APOPTOTIC MITOCHONDRIAL CHANGES	7.3009e-08	0.55553	0.5818	1	1
3	NEGATIVE REGULATION OF HYDROLASE ACTIVITY	1.2939e-17	0.54939	0.63864	1	1
3	REACTOME FORMATION OF ATP BY CHEMIOSMOTIC COUPLING	8.5327e-16	0.5415	0.53044	1	1
3	REACTOME RESPIRATORY ELECTRON TRANSPORT	5.9038e-17	0.53983	0.52426	1	1
3	REACTOME RESPIRATORY ELECTRON TRANSPORT ATP SYNTHESIS BY CHEMIOSMOTIC COUPLING AND HEAT PRODUCTION BY UNCOUPLING PROTEINS	2.3423e-17	0.517	0.51618	1	1
3	CYTOCHROME C OXIDASE ACTIVITY	4.6328e-13	0.51598	0.48715	1	1
3	NADH DEHYDROGENASE COMPLEX	2.8647e-16	0.5157	0.51736	1	1
3	MITOCHONDRIAL RESPIRATORY CHAIN COMPLEX I	2.8647e-16	0.5157	0.51736	1	1
3	RESPIRATORY CHAIN COMPLEX I	2.8647e-16	0.5157	0.51736	1	1
3	REGULATION OF MUSCLE CONTRACTION	2.4376e-15	0.50101	0.51828	1	1
3	REACTOME TRANSLATION	1.6087e-19	0.48581	0.46824	1	1
3	RIBOSOME	1.0588e-23	0.48012	0.47297	1	1
3	REACTOME MRNA DECAY BY 3 TO 5 EXORIBONUCLEASE	1.2763e-25	0.44046	0.42799	1	1
3	REACTOME INFLUENZA LIFE CYCLE	5.1786e-21	0.43743	0.44833	1	1
3	KEGG OXIDATIVE PHOSPHORYLATION	9.5994e-18	0.43599	0.42741	1	1
3	REACTOME ACTIVATION OF THE MRNA UPON BINDING OF THE CAP BINDING COMPLEX AND EIFS AND SUBSEQUENT BINDING TO 43S	1.5674e-16	0.4335	0.45923	1	1
3	REACTOME BASE FREE SUGAR PHOSPHATE REMOVAL VIA THE SINGLE NUCLEOTIDE REPLACEMENT PATHWAY	3.2335e-24	0.42151	0.40562	1	1
3	KEGG PARKINSONS DISEASE	3.033e-18	0.41383	0.37942	1	1
3	MITOCHONDRIAL RESPIRATORY CHAIN	4.339e-14	0.41001	0.38892	1	1
3	MITOCHONDRIAL MEMBRANE PART	2.4418e-16	0.39343	0.37878	1	1
3	KEGG PROTEASOME	6.1767e-16	0.38821	0.35126	1	1
3	REACTOME VIF MEDIATED DEGRADATION OF APOBEC3G	2.204e-17	0.37778	0.3622	1	1
3	REACTOME METABOLISM OF MRNA	8.7442e-23	0.36731	0.375	1	1
3	MAINTENANCE OF CELLULAR LOCALIZATION	5.187e-16	0.36247	0.36346	1	1
3	REACTOME CROSS PRESENTATION OF SOLUBLE EXOGENOUS ANTIGENS ENDOSOMES	1.9081e-13	0.35386	0.35078	1	1
3	REACTOME VIRAL MESSENGER RNA SYNTHESIS	8.1906e-24	0.34872	0.36395	1	1
3	REACTOME STRIATED MUSCLE CONTRACTION	1.2179e-09	0.34622	0.3627	1	1
3	REACTOME DESTABILIZATION OF MRNA BY AUF1 HNRNP D0	1.5815e-15	0.34606	0.32063	1	1
3	REACTOME CDK MEDIATED PHOSPHORYLATION AND REMOVAL OF CDC6	6.795e-15	0.34312	0.31461	1	1
3	SMOOTH MUSCLE CONTRACTION GO 0006939	0.0015231	0.34249	0.20417	1	1
3	REACTOME RESOLUTION OF AP SITES VIA THE MULTIPLE NUCLEOTIDE PATCH REPLACEMENT PATHWAY	4.7765e-22	0.34009	0.3279	1	1
3	REACTOME ER PHAGOSOME PATHWAY	4.939e-11	0.3369	0.31187	1	1
3	PROTON TRANSPORTING TWO SECTOR ATPASE COMPLEX	1.5643e-12	0.33392	0.31218	1	1
3	REACTOME REGULATION OF ORNITHINE DECARBOXYLASE ODC	6.4922e-16	0.33127	0.31337	1	1
3	ORGANELLAR SMALL RIBOSOMAL SUBUNIT	4.5984e-13	0.33054	0.29774	1	1
3	MITOCHONDRIAL SMALL RIBOSOMAL SUBUNIT	4.5984e-13	0.33054	0.29774	1	1
3	SMALL RIBOSOMAL SUBUNIT	4.5984e-13	0.33054	0.29774	1	1
3	SMALL NUCLEAR RIBONUCLEOPROTEIN COMPLEX	2.1001e-23	0.32983	0.32805	1	1
3	MITOCHONDRIAL INNER MEMBRANE	6.0247e-16	0.32979	0.32587	1	1
3	REACTOME RESOLUTION OF AP SITES VIA THE SINGLE NUCLEOTIDE REPLACEMENT PATHWAY	9.1026e-23	0.32968	0.31908	1	1
3	REACTOME TCA CYCLE AND RESPIRATORY ELECTRON TRANSPORT	2.0622e-12	0.32958	0.28092	1	1
3	REACTOME P53 INDEPENDENT G1 S DNA DAMAGE CHECKPOINT	1.3871e-15	0.32735	0.31571	1	1
3	REACTOME AUTODEGRADATION OF THE E3 UBIQUITIN LIGASE COP1	5.2741e-16	0.32343	0.31276	1	1
3	LIPID HOMEOSTASIS	6.0575e-06	0.32096	0.25861	1	1
3	REACTOME CDT1 ASSOCIATION WITH THE CDC6 ORC ORIGIN COMPLEX	4.239e-14	0.3177	0.3044	1	1
3	BIOCARTA PROTEASOME PATHWAY	8.2024e-13	0.31475	0.25626	1	1
3	REACTOME MRNA SPLICING MINOR PATHWAY	5.3387e-23	0.31336	0.30717	1	1
3	REACTOME AUTODEGRADATION OF CDH1 BY CDH1 APC C	4.8446e-17	0.30788	0.2867	1	1
3	REACTOME SCF BETA TRCP MEDIATED DEGRADATION OF EMI1	8.0377e-15	0.30686	0.29682	1	1
3	MYOSIN COMPLEX	1.8617e-11	0.3015	0.28917	1	1
3	BIOCARTA MTA3 PATHWAY	6.8667e-18	0.30049	0.33504	1	1
3	REACTOME LIPOPROTEIN METABOLISM	8.1339e-05	0.30038	0.24389	1	1
3	CALCIUM INDEPENDENT CELL CELL ADHESION	1.5576e-06	0.29814	0.36851	1	1
3	REACTOME METABOLISM OF RNA	1.1042e-20	0.29083	0.29188	1	1
3	MANNOSYLTRANSFERASE ACTIVITY	4.0881e-18	0.28988	0.30815	1	1
3	PROTEIN MATURATION	8.4624e-16	0.2876	0.30741	1	1
3	KINASE INHIBITOR ACTIVITY	6.7065e-07	0.28611	0.29279	1	1
3	ORGANELLE INNER MEMBRANE	3.5118e-15	0.28567	0.27959	1	1
3	RNA ELONGATION	8.3998e-23	0.28396	0.28118	1	1
3	REACTOME BASE EXCISION REPAIR	4.8879e-21	0.28322	0.28142	1	1
3	REACTOME REGULATION OF APOPTOSIS	6.7408e-15	0.28283	0.26036	1	1
3	REACTOME ABORTIVE ELONGATION OF HIV1 TRANSCRIPT IN THE ABSENCE OF TAT	2.6e-24	0.27895	0.29263	1	1
3	PROTEIN KINASE INHIBITOR ACTIVITY	2.306e-09	0.27682	0.31863	1	1
3	NEGATIVE REGULATION OF TRANSCRIPTION FACTOR ACTIVITY	2.0111e-09	0.2748	0.22961	1	1
3	MITOCHONDRION ORGANIZATION AND BIOGENESIS	4.7628e-14	0.27278	0.26886	1	1
3	ISOPRENOID METABOLIC PROCESS	1.5828e-10	0.2666	0.25919	1	1
3	REACTOME REGULATION OF INSULIN LIKE GROWTH FACTOR IGF ACTIVITY BY INSULIN LIKE GROWTH FACTOR BINDING PROTEINS IGFBPS	0.00044252	0.26587	0.25216	1	1
3	REACTOME SLBP DEPENDENT PROCESSING OF REPLICATION DEPENDENT HISTONE PRE MRNAS	1.8202e-18	0.26459	0.24889	1	1
3	REACTOME DESTABILIZATION OF MRNA BY KSRP	7.1571e-26	0.26304	0.2731	1	1
3	RRNA METABOLIC PROCESS	4.1613e-15	0.26131	0.24698	1	1
3	CONTRACTILE FIBER PART	7.2897e-07	0.26101	0.26744	1	1
3	OXIDOREDUCTASE ACTIVITY ACTING ON NADH OR NADPH	2.5622e-13	0.25957	0.26697	1	1
3	MAINTENANCE OF CELLULAR PROTEIN LOCALIZATION	4.5303e-13	0.25603	0.25684	1	1
3	REACTOME P53 DEPENDENT G1 DNA DAMAGE RESPONSE	1.7688e-13	0.25601	0.25142	1	1
3	CARBONATE DEHYDRATASE ACTIVITY	0.0071337	0.25578	0.19881	1	1
3	NEGATIVE REGULATION OF DNA BINDING	5.1707e-08	0.25336	0.21233	1	1
3	CELL SOMA	1.1919e-08	0.25137	0.31305	1	1
3	KEGG TAURINE AND HYPOTAURINE METABOLISM	6.7769e-07	0.25114	0.26719	1	1
3	PROTEASOME COMPLEX	8.9682e-14	0.25067	0.20834	1	1
3	STRUCTURAL MOLECULE ACTIVITY	5.6374e-12	0.24922	0.25513	1	1
3	MITOCHONDRIAL MATRIX	4.4293e-11	0.24681	0.2036	1	1
3	MITOCHONDRIAL LUMEN	4.4293e-11	0.24681	0.2036	1	1
3	MITOCHONDRIAL ENVELOPE	8.5018e-12	0.24641	0.21	1	1
3	MITOCHONDRIAL MEMBRANE	7.9306e-14	0.24488	0.23989	1	1
3	REACTOME SCFSKP2 MEDIATED DEGRADATION OF P27 P21	3.4609e-13	0.24315	0.27162	1	1
3	KEGG SULFUR METABOLISM	1.9556e-10	0.24255	0.2706	1	1
3	TRIACYLGLYCEROL METABOLIC PROCESS	0.00073629	0.24153	0.20439	1	1
3	REACTOME ASSEMBLY OF THE PRE REPLICATIVE COMPLEX	4.1066e-10	0.23896	0.23284	1	1
3	RRNA PROCESSING	5.0086e-15	0.2346	0.23136	1	1
3	MITOCHONDRIAL PART	1.0876e-11	0.23447	0.20517	1	1
3	NEGATIVE REGULATION OF PHOSPHORYLATION	0.0009537	0.23246	0.19378	1	1
3	REACTOME APC C CDC20 MEDIATED DEGRADATION OF MITOTIC PROTEINS	9.5753e-13	0.23144	0.22598	1	1
3	REACTOME REGULATION OF MRNA STABILITY BY PROTEINS THAT BIND AU RICH ELEMENTS	3.0109e-15	0.22962	0.20937	1	1
3	STEROL BINDING	3.7355e-06	0.22883	0.2073	1	1
3	REACTOME MITOCHONDRIAL PROTEIN IMPORT	3.5111e-11	0.22685	0.22202	1	1
3	NEGATIVE REGULATION OF PHOSPHATE METABOLIC PROCESS	0.00010243	0.22603	0.21403	1	1
3	REACTOME CYCLIN E ASSOCIATED EVENTS DURING G1 S TRANSITION	1.0575e-11	0.21872	0.2254	1	1
3	RESPONSE TO TOXIN	0.017704	0.21687	0.12567	1	1
3	KEGG HUNTINGTONS DISEASE	1.5299e-14	0.21539	0.19982	1	1
3	PROTEIN DEACETYLASE ACTIVITY	8.4489e-21	0.21255	0.23158	1	1
3	BIOCARTA SARS PATHWAY	0.00017111	0.20884	0.17955	1	1
3	REACTOME ANDROGEN BIOSYNTHESIS	0.001696	0.20862	0.18685	1	1
3	CONTRACTILE FIBER	3.5748e-06	0.20719	0.22922	1	1
3	NEGATIVE REGULATION OF BINDING	4.1208e-07	0.20708	0.18152	1	1
3	DEACETYLASE ACTIVITY	2.715e-17	0.20533	0.21152	1	1
3	REGULATION OF BLOOD PRESSURE	0.00052872	0.20475	0.18846	1	1
3	TRANSLATION	1.9226e-13	0.20405	0.22409	1	1
3	REACTOME PROSTACYCLIN SIGNALLING THROUGH PROSTACYCLIN RECEPTOR	3.6485e-08	0.20369	0.20677	1	1
3	REACTOME SIGNALING BY WNT	4.8889e-12	0.20156	0.18402	1	1
3	STRUCTURAL CONSTITUENT OF MUSCLE	0.0004459	0.20144	0.13235	1	1
3	REACTOME ACTIVATION OF NF KAPPAB IN B CELLS	4.2947e-09	0.20088	0.1842	1	1
3	PHOSPHOTRANSFERASE ACTIVITY PHOSPHATE GROUP AS ACCEPTOR	4.911e-09	0.19852	0.191	1	1
3	REACTOME SYNTHESIS OF SUBSTRATES IN N GLYCAN BIOSYTHESIS	2.3619e-06	0.19605	0.1815	1	1
3	REACTOME RECYCLING OF BILE ACIDS AND SALTS	3.1802e-09	0.19501	0.31835	1	1
3	RIBONUCLEOPROTEIN COMPLEX	1.6948e-20	0.1903	0.20038	1	1
3	REACTOME REVERSIBLE HYDRATION OF CARBON DIOXIDE	0.076799	0.18922	0.11288	1	1
3	PROTEIN TETRAMERIZATION	1.5114e-05	0.18824	0.22365	1	1
3	RNA POLYMERASE ACTIVITY	1.0697e-13	0.18577	0.20381	1	1
3	KEGG CARDIAC MUSCLE CONTRACTION	4.2725e-05	0.1808	0.14509	1	1
3	PID P38 MK2PATHWAY	4.0364e-05	0.18027	0.19055	1	1
3	BODY FLUID SECRETION	0.002921	0.18011	0.16548	1	1
3	NEUROPEPTIDE SIGNALING PATHWAY	6.1176e-05	0.17936	0.21738	1	1
3	REACTOME GLUCONEOGENESIS	3.7961e-05	0.17817	0.1439	1	1
3	PID RHODOPSIN PATHWAY	1.0531e-09	0.17792	0.17397	1	1
3	REACTOME METABOLISM OF PORPHYRINS	1.6352e-08	0.17667	0.16294	1	1
3	HYDROLASE ACTIVITY HYDROLYZING N GLYCOSYL COMPOUNDS	6.877e-12	0.176	0.17032	1	1
3	AMYLOID PRECURSOR PROTEIN METABOLIC PROCESS	9.7685e-08	0.17447	0.19342	1	1
3	REACTOME RNA POL III CHAIN ELONGATION	2.3581e-13	0.17386	0.17307	1	1
3	BRUSH BORDER	1.1347e-05	0.17242	0.2812	1	1
3	REACTOME RNA POL III TRANSCRIPTION TERMINATION	1.6271e-13	0.17163	0.1625	1	1
3	KEGG ALZHEIMERS DISEASE	5.2862e-11	0.17145	0.1645	1	1
3	SA G1 AND S PHASES	3.9837e-05	0.17007	0.17552	1	1
3	KEGG BASE EXCISION REPAIR	2.0802e-11	0.16849	0.15701	1	1
3	REACTOME TIGHT JUNCTION INTERACTIONS	0.0010323	0.16665	0.218	1	1
3	HYDROLASE ACTIVITY ACTING ON CARBON NITROGEN NOT PEPTIDEBONDSIN LINEAR AMIDES	1.8201e-09	0.16215	0.17162	1	1
3	CHAPERONE BINDING	2.9279e-10	0.16188	0.16754	1	1
3	STEROID DEHYDROGENASE ACTIVITY	0.004005	0.15937	0.11681	1	1
3	KEGG SPLICEOSOME	1.5666e-14	0.15936	0.14387	1	1
3	NUCLEOLAR PART	4.1731e-13	0.15919	0.16557	1	1
3	REACTOME ENDOSOMAL SORTING COMPLEX REQUIRED FOR TRANSPORT ESCRT	5.6816e-09	0.15786	0.15384	1	1
3	REACTOME XENOBIOTICS	0.0050491	0.15667	0.14426	1	1
3	REACTOME METABOLISM OF PROTEINS	5.6958e-11	0.1558	0.14595	1	1
3	LIPID TRANSPORT	5.9623e-05	0.15419	0.13469	1	1
3	PID CONE PATHWAY	3.3468e-08	0.14929	0.168	1	1
3	SARCOMERE	0.034891	0.14851	0.12452	1	1
3	SPLICEOSOME	1.1114e-16	0.14839	0.15823	1	1
3	KEGG METABOLISM OF XENOBIOTICS BY CYTOCHROME P450	2.57e-06	0.14755	0.16079	1	1
3	REACTOME ACTIVATION OF GENES BY ATF4	6.6636e-05	0.14716	0.14566	1	1
3	KEGG RNA POLYMERASE	1.5537e-11	0.14705	0.16297	1	1
3	FATTY ACID BETA OXIDATION	1.9166e-05	0.14499	0.11068	1	1
3	MITOCHONDRION	1.5179e-09	0.1448	0.13312	1	1
3	RESPONSE TO OXIDATIVE STRESS	5.6131e-09	0.13753	0.15392	1	1
3	REACTOME BOTULINUM NEUROTOXICITY	0.0035143	0.13745	0.13243	1	1
3	SULFOTRANSFERASE ACTIVITY	0.00060732	0.13723	0.10496	1	1
3	REACTOME ELONGATION ARREST AND RECOVERY	7.7161e-19	0.13706	0.14918	1	1
3	AEROBIC RESPIRATION	0.00079235	0.13644	0.074262	1	1
3	REACTOME SYNTHESIS AND INTERCONVERSION OF NUCLEOTIDE DI AND TRIPHOSPHATES	0.00026022	0.13581	0.11687	1	1
3	CARBON OXYGEN LYASE ACTIVITY	0.00026749	0.13451	0.15053	1	1
3	REACTOME MRNA SPLICING	6.5411e-14	0.13413	0.11806	1	1
3	TRANSFERASE ACTIVITY TRANSFERRING SULFUR CONTAINING GROUPS	4.0188e-05	0.13309	0.11501	1	1
3	REACTOME RETROGRADE NEUROTROPHIN SIGNALLING	0.022449	0.13304	0.088265	1	1
3	REACTOME DESTABILIZATION OF MRNA BY BRF1	3.7726e-17	0.13259	0.16238	1	1
3	REACTOME RNA POL III TRANSCRIPTION INITIATION FROM TYPE 3 PROMOTER	1.0282e-11	0.12916	0.1219	1	1
3	REACTOME FORMATION OF THE HIV1 EARLY ELONGATION COMPLEX	2.2447e-11	0.12865	0.13343	1	1
3	OXIDOREDUCTASE ACTIVITY GO 0016616	1.6802e-06	0.12834	0.13345	1	1
3	REACTOME INSULIN RECEPTOR RECYCLING	2.1691e-07	0.1278	0.12505	1	1
3	REACTOME PACKAGING OF TELOMERE ENDS	0.0071121	0.12421	0.11655	1	1
3	RIBOSOME BIOGENESIS AND ASSEMBLY	1.5663e-09	0.12305	0.14755	1	1
3	REACTOME GLYCOPROTEIN HORMONES	0.028999	0.12228	0.15397	1	1
3	RIBONUCLEOPROTEIN BINDING	1.6161e-09	0.11929	0.11708	1	1
3	REACTOME RNA POL I PROMOTER OPENING	0.01119	0.11852	0.11439	1	1
3	GLYCEROPHOSPHOLIPID BIOSYNTHETIC PROCESS	8.0324e-08	0.11751	0.13045	1	1
3	FEEDING BEHAVIOR	0.025677	0.11549	0.12643	1	1
3	REACTOME TRANSFERRIN ENDOCYTOSIS AND RECYCLING	0.00088069	0.11456	0.080251	1	1
3	KEGG GLYOXYLATE AND DICARBOXYLATE METABOLISM	0.00026022	0.11403	0.088995	1	1
3	NEGATIVE REGULATION OF DNA REPLICATION	0.015165	0.11183	0.10873	1	1
3	REACTOME GAMMA CARBOXYLATION TRANSPORT AND AMINO TERMINAL CLEAVAGE OF PROTEINS	6.2768e-05	0.11079	0.27097	1	1
3	REACTOME DESTABILIZATION OF MRNA BY TRISTETRAPROLIN TTP	5.2188e-09	0.10853	0.11	1	1
3	KEGG PYRIMIDINE METABOLISM	4.8688e-07	0.1076	0.10082	1	1
3	OXIDOREDUCTASE ACTIVITY ACTING ON CH OH GROUP OF DONORS	9.6809e-06	0.1063	0.10999	1	1
3	RNA BINDING	1.0241e-08	0.10555	0.095441	1	1
3	REACTOME LIPID DIGESTION MOBILIZATION AND TRANSPORT	0.0082428	0.098364	0.11076	1	1
3	DEOXYRIBONUCLEASE ACTIVITY	0.00011698	0.095432	0.080998	1	1
3	NUCLEOTIDE KINASE ACTIVITY	0.050849	0.095327	0.075962	1	1
3	REACTOME CHOLESTEROL BIOSYNTHESIS	0.0030338	0.094445	0.076241	1	1
3	REACTOME TELOMERE MAINTENANCE	0.0045788	0.09122	0.085804	1	1
3	KEGG GLYCEROPHOSPHOLIPID METABOLISM	0.0036125	0.084176	0.073785	1	1
3	RNA SPLICINGVIA TRANSESTERIFICATION REACTIONS	7.0288e-07	0.08131	0.067294	1	1
3	KEGG DRUG METABOLISM OTHER ENZYMES	0.0011992	0.080428	0.079814	1	1
3	PHOSPHATE TRANSMEMBRANE TRANSPORTER ACTIVITY	0.034544	0.080265	0.11899	1	1
3	PHOSPHOLIPID BIOSYNTHETIC PROCESS	6.1157e-06	0.078336	0.07449	1	1
3	REACTOME SYNTHESIS OF PE	0.033943	0.075736	0.040677	1	1
3	REACTOME GLYCOLYSIS	0.019793	0.073135	0.082581	1	1
3	UNFOLDED PROTEIN BINDING	0.0024083	0.07211	0.05646	1	1
3	PROTEIN SERINE THREONINE PHOSPHATASE COMPLEX	0.00018698	0.071885	0.040174	1	1
3	REACTOME MICRORNA MIRNA BIOGENESIS	8.25e-06	0.070529	0.066559	1	1
3	REACTOME TRANSCRIPTION COUPLED NER TC NER	0.042082	0.045722	0.041931	1	1
4	REACTOME TRANSLOCATION OF ZAP 70 TO IMMUNOLOGICAL SYNAPSE	2.8847e-24	2.6715	2.4476	1	1
4	BIOCARTA TCRA PATHWAY	1.0934e-24	2.4897	2.299	1	1
4	REACTOME PHOSPHORYLATION OF CD3 AND TCR ZETA CHAINS	4.8651e-25	2.4757	2.2631	1	1
4	BIOCARTA BLYMPHOCYTE PATHWAY	4.3328e-27	2.4296	2.3565	1	1
4	IMMUNOLOGICAL SYNAPSE	6.464e-24	2.4262	2.0937	1	1
4	REACTOME PD1 SIGNALING	2.9452e-24	2.3832	2.1446	1	1
4	BIOCARTA TCYTOTOXIC PATHWAY	1.7956e-25	2.3691	2.338	1	1
4	BIOCARTA THELPER PATHWAY	3.9587e-26	2.3167	2.3214	1	1
4	BIOCARTA CTL PATHWAY	2.349e-23	2.1211	2.0254	1	1
4	BIOCARTA NO2IL12 PATHWAY	4.6639e-25	2.1203	2.0219	1	1
4	BIOCARTA CTLA4 PATHWAY	7.101e-27	2.0225	1.9568	1	1
4	REACTOME GENERATION OF SECOND MESSENGER MOLECULES	2.1979e-25	1.9156	1.8085	1	1
4	KEGG ALLOGRAFT REJECTION	2.9452e-24	1.8393	1.7504	1	1
4	KEGG PRIMARY IMMUNODEFICIENCY	7.7005e-24	1.826	1.7173	1	1
4	REACTOME CHEMOKINE RECEPTORS BIND CHEMOKINES	6.1868e-30	1.801	1.8885	1	1
4	KEGG GRAFT VERSUS HOST DISEASE	1.3202e-24	1.7718	1.7588	1	1
4	BIOCARTA ASBCELL PATHWAY	5.9259e-27	1.7688	1.7299	1	1
4	CHEMOKINE RECEPTOR BINDING	3.3624e-29	1.726	1.8939	1	1
4	CHEMOKINE ACTIVITY	3.9461e-29	1.7178	1.8834	1	1
4	BIOCARTA TH1TH2 PATHWAY	4.0115e-27	1.7011	1.6255	1	1
4	BIOCARTA IL12 PATHWAY	8.1408e-26	1.6769	1.5747	1	1
4	KEGG INTESTINAL IMMUNE NETWORK FOR IGA PRODUCTION	5.4116e-26	1.6769	1.603	1	1
4	BIOCARTA IL17 PATHWAY	1.0279e-27	1.6761	1.6933	1	1
4	BIOCARTA CLASSIC PATHWAY	3.6705e-26	1.6748	1.7377	1	1
4	BIOCARTA NKT PATHWAY	5.8834e-28	1.6372	1.6082	1	1
4	INTERLEUKIN RECEPTOR ACTIVITY	2.6742e-29	1.6131	1.6475	1	1
4	BIOCARTA LAIR PATHWAY	2.7739e-30	1.607	1.8117	1	1
4	REACTOME IMMUNOREGULATORY INTERACTIONS BETWEEN A LYMPHOID AND A NON LYMPHOID CELL	4.233e-24	1.5241	1.454	1	1
4	BIOCARTA DC PATHWAY	1.2698e-27	1.4772	1.4379	1	1
4	BIOCARTA GRANULOCYTES PATHWAY	7.3867e-29	1.4712	1.6093	1	1
4	KEGG TYPE I DIABETES MELLITUS	4.471e-25	1.4709	1.5181	1	1
4	G PROTEIN COUPLED RECEPTOR BINDING	5.7504e-29	1.4616	1.592	1	1
4	INTERLEUKIN BINDING	4.0837e-29	1.4576	1.4805	1	1
4	BIOCARTA COMP PATHWAY	2.9249e-26	1.4342	1.505	1	1
4	HUMORAL IMMUNE RESPONSE	1.7519e-27	1.429	1.41	1	1
4	KEGG ASTHMA	2.0902e-26	1.4265	1.4985	1	1
4	LEUKOCYTE CHEMOTAXIS	1.5251e-26	1.4156	1.3453	1	1
4	EXTERNAL SIDE OF PLASMA MEMBRANE	2.4185e-25	1.4006	1.281	1	1
4	KEGG HEMATOPOIETIC CELL LINEAGE	4.4744e-29	1.3961	1.4731	1	1
4	PID IL12 STAT4PATHWAY	7.419e-27	1.378	1.3272	1	1
4	BIOCARTA MONOCYTE PATHWAY	7.2205e-29	1.373	1.5022	1	1
4	ACTIVATION OF IMMUNE RESPONSE	1.8149e-26	1.371	1.328	1	1
4	BIOCARTA LYM PATHWAY	5.5737e-30	1.3702	1.5082	1	1
4	T CELL ACTIVATION	2.0841e-25	1.3693	1.2799	1	1
4	LOCOMOTORY BEHAVIOR	1.3594e-30	1.3561	1.4446	1	1
4	PID IL12 2PATHWAY	3.1868e-25	1.3446	1.2779	1	1
4	ADAPTIVE IMMUNE RESPONSE GO 0002460	1.0188e-26	1.3438	1.3342	1	1
4	CELLULAR DEFENSE RESPONSE	2.0013e-26	1.3335	1.3273	1	1
4	POSITIVE REGULATION OF T CELL ACTIVATION	1.0528e-25	1.3269	1.2315	1	1
4	ADAPTIVE IMMUNE RESPONSE	8.2772e-27	1.3121	1.2947	1	1
4	INTERFERON GAMMA PRODUCTION	1.5788e-28	1.3065	1.3062	1	1
4	REGULATION OF T CELL ACTIVATION	1.0486e-24	1.2907	1.1835	1	1
4	B CELL ACTIVATION	9.1598e-26	1.281	1.1894	1	1
4	BIOCARTA IL5 PATHWAY	4.8098e-28	1.2786	1.3978	1	1
4	REACTOME KERATAN SULFATE DEGRADATION	8.1635e-20	1.2762	1.346	1	1
4	LYMPHOCYTE ACTIVATION	4.089e-26	1.2671	1.1948	1	1
4	POSITIVE REGULATION OF CYTOKINE BIOSYNTHETIC PROCESS	1.7087e-28	1.266	1.2865	1	1
4	REACTOME INITIAL TRIGGERING OF COMPLEMENT	3.2551e-25	1.2517	1.4636	1	1
4	BIOCARTA TOB1 PATHWAY	2.7881e-27	1.2517	1.2177	1	1
4	BIOCARTA CSK PATHWAY	3.12e-25	1.2513	1.1913	1	1
4	REACTOME TCR SIGNALING	1.3382e-26	1.2487	1.2006	1	1
4	REGULATION OF LYMPHOCYTE ACTIVATION	2.6822e-26	1.2467	1.174	1	1
4	BIOCARTA INFLAM PATHWAY	2.8975e-29	1.235	1.2809	1	1
4	T CELL DIFFERENTIATION	3.5867e-24	1.2313	1.1386	1	1
4	PID IL23PATHWAY	1.5611e-28	1.2295	1.2537	1	1
4	IMMUNE RESPONSE	9.4838e-29	1.2156	1.2318	1	1
4	HEMATOPOIETIN INTERFERON CLASSD200 DOMAIN CYTOKINE RECEPTOR ACTIVITY	2.4679e-29	1.2131	1.1686	1	1
4	PID IL27PATHWAY	1.6574e-27	1.2076	1.2396	1	1
4	POSITIVE REGULATION OF LYMPHOCYTE ACTIVATION	4.4575e-26	1.2072	1.1535	1	1
4	REGULATION OF INTERFERON GAMMA BIOSYNTHETIC PROCESS	1.8517e-27	1.1962	1.1702	1	1
4	INTERFERON GAMMA BIOSYNTHETIC PROCESS	6.88e-28	1.1851	1.2018	1	1
4	LEUKOCYTE ACTIVATION	3.5538e-27	1.1846	1.152	1	1
4	BIOCARTA CYTOKINE PATHWAY	1.3026e-28	1.1825	1.1733	1	1
4	REACTOME DOWNSTREAM TCR SIGNALING	2.4067e-26	1.1784	1.1379	1	1
4	POSITIVE REGULATION OF T CELL PROLIFERATION	1.1226e-25	1.1725	1.1901	1	1
4	KEGG AUTOIMMUNE THYROID DISEASE	4.8923e-24	1.1695	1.1082	1	1
4	REACTOME INTERFERON GAMMA SIGNALING	2.9759e-24	1.1592	1.132	1	1
4	KEGG LEISHMANIA INFECTION	3.105e-28	1.1541	1.1863	1	1
4	PID CD8TCRPATHWAY	6.6386e-26	1.1538	1.102	1	1
4	BIOCARTA TALL1 PATHWAY	1.2221e-23	1.1471	1.0148	1	1
4	REGULATION OF IMMUNE RESPONSE	7.4393e-28	1.1369	1.1354	1	1
4	POSITIVE REGULATION OF IMMUNE RESPONSE	1.0988e-27	1.1367	1.1906	1	1
4	BIOCARTA ERYTH PATHWAY	9.5412e-25	1.1353	1.2254	1	1
4	LEUKOCYTE MIGRATION	3.3264e-27	1.1333	1.0857	1	1
4	POSITIVE REGULATION OF CELL ADHESION	8.6968e-28	1.1326	1.0983	1	1
4	POSITIVE REGULATION OF DEFENSE RESPONSE	2.6972e-27	1.1313	1.1578	1	1
4	PID TCR PATHWAY	3.9676e-27	1.1229	1.1119	1	1
4	REACTOME IL 7 SIGNALING	1.6759e-27	1.1143	1.1666	1	1
4	PID INTEGRIN2 PATHWAY	4.1211e-30	1.1116	1.2164	1	1
4	REGULATION OF IMMUNE SYSTEM PROCESS	6.7224e-27	1.1109	1.0755	1	1
4	BIOCARTA LECTIN PATHWAY	1.8707e-22	1.1077	1.1265	1	1
4	CELL ACTIVATION	6.434e-27	1.1036	1.0701	1	1
4	REACTOME CD28 DEPENDENT VAV1 PATHWAY	4.1008e-27	1.0989	1.1867	1	1
4	SA MMP CYTOKINE CONNECTION	5.3198e-28	1.0905	1.2681	1	1
4	POSITIVE REGULATION OF IMMUNE SYSTEM PROCESS	7.8365e-27	1.09	1.0942	1	1
4	ST INTERFERON GAMMA PATHWAY	2.1289e-25	1.0869	1.0045	1	1
4	REACTOME COMPLEMENT CASCADE	7.1792e-27	1.065	1.1418	1	1
4	BIOCARTA STATHMIN PATHWAY	3.3303e-26	1.0647	1.0082	1	1
4	T CELL PROLIFERATION	2.4185e-25	1.0633	1.0289	1	1
4	COLLAGEN	1.2939e-17	1.0585	1.1791	1	1
4	CYTOKINE BINDING	1.3891e-29	1.0569	1.0954	1	1
4	PID TOLL ENDOGENOUS PATHWAY	2.7436e-28	1.0567	1.0748	1	1
4	IMMUNE SYSTEM PROCESS	3.0682e-29	1.0553	1.0927	1	1
4	PATTERN RECOGNITION RECEPTOR ACTIVITY	2.7765e-25	1.0529	1.1625	1	1
4	NEGATIVE REGULATION OF IMMUNE SYSTEM PROCESS	6.2989e-29	1.0528	1.0548	1	1
4	CELL RECOGNITION	1.4752e-28	1.0519	1.0979	1	1
4	PID INTEGRIN5 PATHWAY	1.2269e-24	1.0516	1.1539	1	1
4	REGULATION OF CYTOKINE BIOSYNTHETIC PROCESS	1.1686e-29	1.048	1.1086	1	1
4	REGULATION OF T CELL PROLIFERATION	3.8356e-25	1.0453	0.99985	1	1
4	REACTOME SIGNAL REGULATORY PROTEIN SIRP FAMILY INTERACTIONS	1.7377e-26	1.0334	1.0523	1	1
4	POSITIVE REGULATION OF TRANSLATION	1.6134e-29	1.0327	1.0804	1	1
4	REGULATION OF IMMUNE EFFECTOR PROCESS	8.2286e-26	1.0295	0.99334	1	1
4	LYMPHOCYTE DIFFERENTIATION	1.9552e-25	1.0277	0.95858	1	1
4	POSITIVE REGULATION OF MULTICELLULAR ORGANISMAL PROCESS	1.9356e-27	1.0269	1.057	1	1
4	POSITIVE REGULATION OF CYTOKINE PRODUCTION	6.0712e-25	1.0258	1.0628	1	1
4	REACTOME COSTIMULATION BY THE CD28 FAMILY	3.5152e-26	1.0248	1.0094	1	1
4	KEGG CYTOKINE CYTOKINE RECEPTOR INTERACTION	6.8759e-31	1.0223	1.0786	1	1
4	REACTOME IL 6 SIGNALING	1.1237e-22	1.012	1.0077	1	1
4	CYTOKINE BIOSYNTHETIC PROCESS	1.3575e-29	1.0034	1.0759	1	1
4	BIOCARTA STEM PATHWAY	3.224e-26	0.99959	1.1248	1	1
4	CYTOKINE METABOLIC PROCESS	1.0412e-29	0.99905	1.0705	1	1
4	REACTOME ANTIGEN ACTIVATES B CELL RECEPTOR LEADING TO GENERATION OF SECOND MESSENGERS	1.126e-23	0.99697	0.91846	1	1
4	REACTOME PLATELET ADHESION TO EXPOSED COLLAGEN	2.6676e-27	0.99557	1.0658	1	1
4	POSITIVE REGULATION OF RESPONSE TO STIMULUS	5.3095e-29	0.98622	1.0133	1	1
4	IMMUNE EFFECTOR PROCESS	5.2963e-26	0.97757	0.91027	1	1
4	DEFENSE RESPONSE	5.7711e-30	0.9719	1.0289	1	1
4	REACTOME DEGRADATION OF THE EXTRACELLULAR MATRIX	4.3313e-18	0.96773	1.0095	1	1
4	PID CD8TCRDOWNSTREAMPATHWAY	1.4131e-26	0.96611	0.91979	1	1
4	KEGG CELL ADHESION MOLECULES CAMS	1.831e-29	0.96303	1.0452	1	1
4	REACTOME INFLAMMASOMES	1.7377e-26	0.96063	0.94485	1	1
4	INFLAMMATORY RESPONSE	2.3015e-30	0.95819	1.0573	1	1
4	REACTOME P2Y RECEPTORS	1.2449e-28	0.9473	1.0259	1	1
4	KEGG VIRAL MYOCARDITIS	3.4382e-27	0.94616	0.98877	1	1
4	CYTOKINE ACTIVITY	1.8101e-29	0.94489	1.0234	1	1
4	BIOCARTA IL7 PATHWAY	3.5429e-25	0.94379	0.97102	1	1
4	BIOCARTA IL10 PATHWAY	1.1878e-27	0.93927	0.96166	1	1
4	DETECTION OF BIOTIC STIMULUS	1.124e-26	0.93287	0.97823	1	1
4	INTERLEUKIN 2 PRODUCTION	3.3633e-27	0.92736	0.95361	1	1
4	REACTOME NUCLEOTIDE LIKE PURINERGIC RECEPTORS	4.8465e-29	0.92681	0.97801	1	1
4	KEGG ANTIGEN PROCESSING AND PRESENTATION	9.8412e-22	0.92296	0.84565	1	1
4	REACTOME REGULATION OF COMPLEMENT CASCADE	2.4968e-23	0.92293	1.2749	1	1
4	REACTOME TRYPTOPHAN CATABOLISM	2.2477e-24	0.9206	0.93309	1	1
4	ST T CELL SIGNAL TRANSDUCTION	8.0099e-27	0.92015	0.88308	1	1
4	PID INTEGRIN1 PATHWAY	7.1889e-22	0.9161	0.9889	1	1
4	LEUKOCYTE DIFFERENTIATION	4.4781e-27	0.90621	0.90291	1	1
4	BEHAVIOR	1.7385e-30	0.90197	0.99312	1	1
4	METALLOENDOPEPTIDASE ACTIVITY	1.5886e-21	0.89906	0.92708	1	1
4	REACTOME EICOSANOID LIGAND BINDING RECEPTORS	4.9168e-25	0.8988	0.95809	1	1
4	ANTIGEN BINDING	1.189e-24	0.89863	0.90283	1	1
4	BIOCARTA NKCELLS PATHWAY	7.8259e-21	0.89501	0.85172	1	1
4	PID SYNDECAN 1 PATHWAY	1.054e-21	0.88831	1.004	1	1
4	PID INTEGRIN CS PATHWAY	3.8387e-27	0.88567	0.93927	1	1
4	PID FRA PATHWAY	5.3137e-24	0.87829	1.0507	1	1
4	PID NFAT TFPATHWAY	2.6136e-29	0.87731	0.93222	1	1
4	PID TCRJNKPATHWAY	1.0188e-26	0.87251	0.81456	1	1
4	SH2 DOMAIN BINDING	9.2455e-25	0.86944	0.79505	1	1
4	KEGG COMPLEMENT AND COAGULATION CASCADES	1.5262e-28	0.86772	0.9429	1	1
4	PHOSPHOLIPASE A2 ACTIVITY	1.276e-19	0.86405	0.80224	1	1
4	INTEGRIN COMPLEX	1.6314e-25	0.86102	0.942	1	1
4	NEGATIVE REGULATION OF CYTOKINE BIOSYNTHETIC PROCESS	1.6842e-21	0.85924	0.88827	1	1
4	KEGG CHEMOKINE SIGNALING PATHWAY	2.3285e-30	0.85811	0.91651	1	1
4	REACTOME EXTRACELLULAR MATRIX ORGANIZATION	5.0187e-20	0.85737	0.92455	1	1
4	PID IL8CXCR1 PATHWAY	2.8064e-30	0.8489	0.90607	1	1
4	RECEPTOR COMPLEX	9.6035e-30	0.84641	0.88571	1	1
4	REACTOME TRAFFICKING AND PROCESSING OF ENDOSOMAL TLR	2.5215e-22	0.84397	0.78117	1	1
4	PID IL8CXCR2 PATHWAY	3.6686e-30	0.84337	0.89476	1	1
4	PID IL4 2PATHWAY	2.2748e-30	0.84228	0.90718	1	1
4	CYTOKINE PRODUCTION	3.4011e-29	0.83573	0.87994	1	1
4	INNATE IMMUNE RESPONSE	6.4339e-28	0.83358	0.83739	1	1
4	PID UPA UPAR PATHWAY	1.5783e-23	0.83025	0.88629	1	1
4	PID IL2 STAT5PATHWAY	2.1622e-27	0.82855	0.92285	1	1
4	REGULATION OF RESPONSE TO STIMULUS	7.8187e-29	0.82639	0.83157	1	1
4	BIOCARTA TCR PATHWAY	1.9572e-27	0.82536	0.78836	1	1
4	KEGG B CELL RECEPTOR SIGNALING PATHWAY	3.4006e-27	0.82487	0.75893	1	1
4	DEFENSE RESPONSE TO VIRUS	7.9012e-21	0.82106	0.76538	1	1
4	REACTOME THE NLRP3 INFLAMMASOME	1.5586e-26	0.82023	0.88743	1	1
4	RESPIRATORY GASEOUS EXCHANGE	2.4705e-25	0.81983	0.8472	1	1
4	RESPONSE TO WOUNDING	8.9082e-31	0.81605	0.88948	1	1
4	EXTRACELLULAR MATRIX STRUCTURAL CONSTITUENT	7.2404e-18	0.81545	0.88276	1	1
4	BIOCARTA CCR5 PATHWAY	4.9649e-26	0.81018	0.82418	1	1
4	DELAYED RECTIFIER POTASSIUM CHANNEL ACTIVITY	3.7096e-23	0.80929	0.81976	1	1
4	REGULATION OF DEFENSE RESPONSE	8.6819e-26	0.80801	0.75287	1	1
4	RESPONSE TO BACTERIUM	3.887e-28	0.80588	0.81741	1	1
4	REGULATION OF CYTOKINE PRODUCTION	1.1488e-26	0.80556	0.82317	1	1
4	RESPONSE TO VIRUS	3.4382e-27	0.80061	0.79076	1	1
4	REACTOME TRAF6 MEDIATED IRF7 ACTIVATION IN TLR7 8 OR 9 SIGNALING	2.0402e-25	0.79801	0.85282	1	1
4	PID INTEGRIN A9B1 PATHWAY	5.6497e-26	0.79542	0.88873	1	1
4	PID AMB2 NEUTROPHILS PATHWAY	3.9799e-30	0.79163	0.90642	1	1
4	KEGG T CELL RECEPTOR SIGNALING PATHWAY	2.882e-27	0.79146	0.77586	1	1
4	REACTOME ACYL CHAIN REMODELLING OF PI	4.0181e-22	0.79114	0.81234	1	1
4	MESODERM DEVELOPMENT	5.0869e-28	0.79013	0.80657	1	1
4	CELLULAR CATION HOMEOSTASIS	1.0533e-29	0.78914	0.85261	1	1
4	CATION HOMEOSTASIS	1.0058e-29	0.78702	0.82914	1	1
4	LIPID RAFT	1.627e-24	0.78125	0.84821	1	1
4	KEGG NATURAL KILLER CELL MEDIATED CYTOTOXICITY	6.3592e-26	0.77917	0.77674	1	1
4	REACTOME THE ROLE OF NEF IN HIV1 REPLICATION AND DISEASE PATHOGENESIS	2.7673e-24	0.77825	0.72273	1	1
4	RESPONSE TO EXTERNAL STIMULUS	8.3012e-31	0.77616	0.82435	1	1
4	POSITIVE REGULATION OF PROTEIN SECRETION	3.931e-20	0.77443	0.80223	1	1
4	KEGG ECM RECEPTOR INTERACTION	8.5302e-21	0.77378	0.8562	1	1
4	REACTOME IL RECEPTOR SHC SIGNALING	5.4319e-29	0.77265	0.86901	1	1
4	RESPONSE TO OTHER ORGANISM	1.8915e-28	0.7724	0.77915	1	1
4	PID BCR 5PATHWAY	2.3622e-27	0.77238	0.74894	1	1
4	CORNIFIED ENVELOPE	2.3781e-08	0.77135	0.84041	1	1
4	REGULATION OF CELL ADHESION	2.4679e-29	0.76869	0.75819	1	1
4	REACTOME COLLAGEN FORMATION	9.5926e-19	0.76195	0.88352	1	1
4	REACTOME PEPTIDE LIGAND BINDING RECEPTORS	5.4459e-30	0.76024	0.79528	1	1
4	DEFENSE RESPONSE TO BACTERIUM	4.1113e-28	0.75962	0.8062	1	1
4	CALCIUM MEDIATED SIGNALING	3.4775e-26	0.75935	0.85569	1	1
4	PID SYNDECAN 4 PATHWAY	7.9984e-29	0.75785	0.91068	1	1
4	REGULATION OF CYTOKINE SECRETION	2.0461e-22	0.75684	0.76259	1	1
4	CYTOKINE SECRETION	2.8496e-23	0.75315	0.75522	1	1
4	SUGAR BINDING	2.5134e-26	0.75175	0.80963	1	1
4	KEGG NOD LIKE RECEPTOR SIGNALING PATHWAY	1.9393e-29	0.74867	0.81004	1	1
4	ANCHORED TO MEMBRANE	1.5783e-23	0.74776	0.76839	1	1
4	ANCHORED TO PLASMA MEMBRANE	1.5783e-23	0.74776	0.76839	1	1
4	REACTOME GPVI MEDIATED ACTIVATION CASCADE	1.9617e-29	0.74742	0.80999	1	1
4	PID ANTHRAXPATHWAY	8.6605e-29	0.74719	0.80681	1	1
4	POSITIVE REGULATION OF CYTOKINE SECRETION	5.3123e-18	0.74558	0.80588	1	1
4	PID CXCR3PATHWAY	2.2106e-27	0.74452	0.74511	1	1
4	PID TCRCALCIUMPATHWAY	4.9742e-28	0.74421	0.75195	1	1
4	ST STAT3 PATHWAY	2.9148e-24	0.74028	0.79894	1	1
4	PID PI3KCIPATHWAY	2.2106e-27	0.74015	0.73775	1	1
4	BIOCARTA IL22BP PATHWAY	1.3573e-27	0.73942	0.81122	1	1
4	REGULATION OF TYROSINE PHOSPHORYLATION OF STAT PROTEIN	1.6844e-25	0.73916	0.8133	1	1
4	REACTOME REGULATION OF IFNG SIGNALING	3.12e-25	0.73697	0.69656	1	1
4	REACTOME G ALPHA I SIGNALLING EVENTS	2.9404e-30	0.73588	0.77269	1	1
4	PHAGOCYTOSIS	7.4936e-25	0.72895	0.78383	1	1
4	REGULATION OF MULTICELLULAR ORGANISMAL PROCESS	3.5198e-29	0.72761	0.77659	1	1
4	GROWTH FACTOR BINDING	3.3665e-26	0.72598	0.74699	1	1
4	REACTOME KERATAN SULFATE BIOSYNTHESIS	9.3016e-20	0.72522	0.7422	1	1
4	NEGATIVE REGULATION OF MULTICELLULAR ORGANISMAL PROCESS	5.398e-27	0.72397	0.71373	1	1
4	PRODUCTION OF MOLECULAR MEDIATOR OF IMMUNE RESPONSE	6.2672e-24	0.7213	0.72064	1	1
4	BIOCARTA D4GDI PATHWAY	2.6e-24	0.71743	0.65907	1	1
4	METALLOPEPTIDASE ACTIVITY	1.9427e-24	0.71571	0.74415	1	1
4	INTERLEUKIN 1 SECRETION	2.8889e-16	0.71382	0.70999	1	1
4	SA CASPASE CASCADE	4.5185e-25	0.71367	0.6926	1	1
4	SERINE TYPE ENDOPEPTIDASE ACTIVITY	8.9589e-25	0.71126	0.75211	1	1
4	GLYCOSAMINOGLYCAN BINDING	4.6504e-18	0.71126	0.67495	1	1
4	REACTOME CLASS A1 RHODOPSIN LIKE RECEPTORS	1.7589e-30	0.71092	0.7394	1	1
4	TYROSINE PHOSPHORYLATION OF STAT PROTEIN	3.1211e-26	0.70906	0.77813	1	1
4	PID CXCR4 PATHWAY	2.2004e-29	0.70838	0.74202	1	1
4	KEGG TOLL LIKE RECEPTOR SIGNALING PATHWAY	1.0503e-28	0.70804	0.7314	1	1
4	PROTEINACEOUS EXTRACELLULAR MATRIX	2.5758e-19	0.70804	0.76574	1	1
4	REACTOME ACYL CHAIN REMODELLING OF PG	9.1211e-21	0.70539	0.71095	1	1
4	MYELOID LEUKOCYTE DIFFERENTIATION	2.5996e-19	0.70157	0.74971	1	1
4	BIOCARTA SET PATHWAY	4.271e-21	0.69999	0.65577	1	1
4	REACTOME ACYL CHAIN REMODELLING OF PS	1.3748e-20	0.69982	0.73093	1	1
4	COLLAGEN BINDING	6.0817e-22	0.69859	0.8001	1	1
4	REACTOME HYALURONAN METABOLISM	3.6182e-19	0.69773	0.65362	1	1
4	PID TXA2PATHWAY	2.1753e-29	0.69597	0.72859	1	1
4	KERATINOCYTE DIFFERENTIATION	9.1932e-11	0.69558	0.82396	1	1
4	EXTRACELLULAR MATRIX	3.1243e-19	0.69546	0.75483	1	1
4	PID GLYPICAN 1PATHWAY	1.7567e-26	0.69499	0.68712	1	1
4	POSITIVE REGULATION OF DNA METABOLIC PROCESS	6.2004e-25	0.69309	0.70501	1	1
4	HEMOPOIETIC OR LYMPHOID ORGAN DEVELOPMENT	2.8699e-28	0.69014	0.67992	1	1
4	BIOCARTA CBL PATHWAY	1.6895e-28	0.68923	0.73612	1	1
4	BIOCARTA RAC1 PATHWAY	1.0655e-29	0.68911	0.75222	1	1
4	INTERLEUKIN 8 BIOSYNTHETIC PROCESS	2.5978e-22	0.68757	0.72937	1	1
4	PID INTEGRIN4 PATHWAY	1.9538e-14	0.6852	0.79756	1	1
4	HYDROLASE ACTIVITY ACTING ON CARBON NITROGEN NOT PEPTIDEBONDSIN CYCLIC AMIDINES	1.0268e-22	0.6846	0.60331	1	1
4	ION HOMEOSTASIS	1.1419e-29	0.6825	0.71807	1	1
4	INOSITOL OR PHOSPHATIDYLINOSITOL PHOSPHODIESTERASE ACTIVITY	4.4118e-24	0.68237	0.72238	1	1
4	REGULATION OF PEPTIDYL TYROSINE PHOSPHORYLATION	2.2852e-27	0.68216	0.72459	1	1
4	BIOCARTA CASPASE PATHWAY	1.4834e-27	0.68162	0.70346	1	1
4	SERINE HYDROLASE ACTIVITY	6.428e-26	0.67839	0.722	1	1
4	IMMUNE SYSTEM DEVELOPMENT	4.7563e-28	0.6778	0.68087	1	1
4	HEMOPOIESIS	3.8436e-28	0.67275	0.67937	1	1
4	REACTOME EXTRINSIC PATHWAY FOR APOPTOSIS	1.5302e-25	0.67274	0.70377	1	1
4	BIOCARTA CTCF PATHWAY	5.818e-28	0.66961	0.722	1	1
4	PHOSPHOLIPASE C ACTIVITY	4.9352e-21	0.66876	0.63731	1	1
4	PID AURORA B PATHWAY	8.7754e-26	0.66706	0.69598	1	1
4	BIOCARTA SODD PATHWAY	1.331e-26	0.66701	0.74458	1	1
4	B CELL DIFFERENTIATION	5.9619e-26	0.66332	0.67388	1	1
4	REACTOME CS DS DEGRADATION	1.9e-19	0.66253	0.64632	1	1
4	EXTRACELLULAR MATRIX PART	3.3458e-18	0.66192	0.71341	1	1
4	SIG BCR SIGNALING PATHWAY	1.1145e-23	0.65982	0.59747	1	1
4	REACTOME IKK COMPLEX RECRUITMENT MEDIATED BY RIP1	1.6759e-27	0.65748	0.6571	1	1
4	PATTERN BINDING	6.5799e-22	0.65482	0.6931	1	1
4	REACTOME INTERFERON ALPHA BETA SIGNALING	6.7775e-21	0.65461	0.65032	1	1
4	SERINE TYPE PEPTIDASE ACTIVITY	2.1289e-25	0.65378	0.71118	1	1
4	REACTOME NUCLEOTIDE BINDING DOMAIN LEUCINE RICH REPEAT CONTAINING RECEPTOR NLR SIGNALING PATHWAYS	2.7996e-29	0.65235	0.71612	1	1
4	PID AVB3 INTEGRIN PATHWAY	1.1737e-19	0.65081	0.64136	1	1
4	INTEGRIN BINDING	2.8061e-25	0.64861	0.69117	1	1
4	REACTOME IL 3 5 AND GM CSF SIGNALING	1.7087e-28	0.64858	0.71566	1	1
4	REACTOME RIP MEDIATED NFKB ACTIVATION VIA DAI	4.3807e-27	0.64822	0.731	1	1
4	SIG PIP3 SIGNALING IN B LYMPHOCYTES	4.1008e-27	0.64329	0.65467	1	1
4	DEAMINASE ACTIVITY	1.1933e-22	0.64004	0.58402	1	1
4	PROTEASE INHIBITOR ACTIVITY	1.7856e-21	0.6399	0.67351	1	1
4	PID EPHA FWDPATHWAY	2.5543e-29	0.63978	0.65518	1	1
4	BIOCARTA EPHA4 PATHWAY	2.2115e-21	0.63968	0.74334	1	1
4	POSITIVE REGULATION OF PEPTIDYL TYROSINE PHOSPHORYLATION	4.1782e-26	0.63909	0.62305	1	1
4	CARBOHYDRATE BINDING	2.1289e-25	0.63757	0.70816	1	1
4	POLYSACCHARIDE BINDING	1.7572e-17	0.63695	0.65796	1	1
4	REACTOME INTEGRIN CELL SURFACE INTERACTIONS	6.6491e-27	0.63236	0.71098	1	1
4	MONOSACCHARIDE BINDING	1.0376e-24	0.63014	0.73391	1	1
4	PID CD40 PATHWAY	4.1921e-27	0.62921	0.62767	1	1
4	REACTOME KERATAN SULFATE KERATIN METABOLISM	2.4826e-19	0.62814	0.63706	1	1
4	RESPONSE TO BIOTIC STIMULUS	9.8122e-29	0.62474	0.65271	1	1
4	KEGG PRION DISEASES	5.073e-26	0.6246	0.62791	1	1
4	REACTOME CHONDROITIN SULFATE BIOSYNTHESIS	2.8126e-22	0.62381	0.62304	1	1
4	REGULATION OF MITOSIS	1.8249e-24	0.62275	0.65038	1	1
4	REACTOME IL 2 SIGNALING	2.4793e-28	0.62068	0.68608	1	1
4	PID INTEGRIN3 PATHWAY	5.0295e-19	0.62035	0.6718	1	1
4	POSITIVE REGULATION OF SECRETION	1.5707e-20	0.61966	0.65828	1	1
4	REGULATION OF PROTEIN SECRETION	8.9222e-22	0.61457	0.58933	1	1
4	EXTRACELLULAR REGION PART	5.7108e-26	0.61444	0.66711	1	1
4	REACTOME SIGNALING BY ILS	4.5227e-30	0.61194	0.68498	1	1
4	REACTOME GPCR LIGAND BINDING	9.7151e-30	0.61061	0.63604	1	1
4	POTASSIUM CHANNEL REGULATOR ACTIVITY	2.2244e-24	0.60865	0.61817	1	1
[truncated: 1,836 more rows]

## Sheet: BRCA breast (metabric)
archetype #	Feature Name	P value (Mann-Whitney)	Median Difference	Mean Difference	Significant after Benjamini-Hochberg correction?	Is first bin maximal?
[truncated: 2,849 more rows]

[truncated: 3 more sheets: BLCA bladder, LIHC liver, COAD colon]
