# Supplementary material for: Tumor diversity and the trade-off between universal cancer tasks
Source: Nat Commun. 2019 Nov 28;10:5423. doi: 10.1038/s41467-019-13195-1 (PMC6882839; doi:10.1038/s41467-019-13195-1)
Supplement: Supplementary file 5 — Supplementary Data 2 [file 41467_2019_13195_MOESM5_ESM.xlsx]

## Sheet: All 6 cancer types
archetype #	Feature Name	P value (Hypergeom.)	Significant after Benjamini-Hochberg correction?	Is first bin maximal?
1	BRCA.SigClust Unsupervised mRNA nature2012: -3	2.2204e-16	1	1
1	followup treatment success: NA	9.992e-16	1	1
1	new neoplasm occurrence anatomic site text:	1.9984e-15	1	1
1	BRCA.SigClust Intrinsic mRNA nature2012: -10	1.8452e-13	1	1
1	LGG.animal insect allergy history: NA	2.6856e-13	1	1
1	LGG.animal insect allergy types: NA	2.6856e-13	1	1
1	LGG.asthma history: NA	2.6856e-13	1	1
1	LGG.eczema history: NA	2.6856e-13	1	1
1	LGG.family history of cancer: NA	2.6856e-13	1	1
1	LGG.family history of primary brain tumor: NA	2.6856e-13	1	1
1	LGG.first diagnosis age asth ecz hay fev mold dust: NA	2.6856e-13	1	1
1	LGG.first diagnosis age of animal insect allergy: NA	2.6856e-13	1	1
1	LGG.first diagnosis age of food allergy: NA	2.6856e-13	1	1
1	LGG.first presenting symptom: NA	2.6856e-13	1	1
1	LGG.first presenting symptom longest duration: NA	2.6856e-13	1	1
1	LGG.food allergy history: NA	2.6856e-13	1	1
1	LGG.food allergy types: NA	2.6856e-13	1	1
1	LGG.hay fever history: NA	2.6856e-13	1	1
1	LGG.headache history: NA	2.6856e-13	1	1
1	LGG.history ionizing rt to head: NA	2.6856e-13	1	1
1	LGG.inherited genetic syndrome found: NA	2.6856e-13	1	1
1	LGG.inherited genetic syndrome result: NA	2.6856e-13	1	1
1	LGG.laterality: NA	2.6856e-13	1	1
1	LGG.ldh1 mutation found: NA	2.6856e-13	1	1
1	LGG.ldh1 mutation tested: NA	2.6856e-13	1	1
1	LGG.ldh1 mutation test method: NA	2.6856e-13	1	1
1	LGG.mental status changes: NA	2.6856e-13	1	1
1	LGG.mold or dust allergy history: NA	2.6856e-13	1	1
1	LGG.motor movement changes: NA	2.6856e-13	1	1
1	LGG.performance status scale timing: NA	2.6856e-13	1	1
1	LGG.preoperative antiseizure meds: NA	2.6856e-13	1	1
1	LGG.preoperative corticosteroids: NA	2.6856e-13	1	1
1	LGG.seizure history: NA	4.6685e-13	1	1
1	LGG.sensory changes: NA	4.6685e-13	1	1
1	LGG.supratentorial localization: NA	4.6685e-13	1	1
1	LGG.tumor location: NA	4.6685e-13	1	1
1	new neoplasm event occurrence anatomic site:	2.331e-12	1	1
1	LGG.visual changes: NA	6.3801e-12	1	1
1	X PANCAN mutation PANCAN: mutation c1uster 9	7.5948e-12	1	1
1	BRCA.RPPA Clusters nature2012: LumA/B	1.6788e-11	1	1
1	BRCA.Integrated Clusters unsup exp nature2012: 3	5.9604e-11	1	1
1	new tumor event additional surgery procedure:	6.569e-11	1	1
1	BRCA.SigClust Intrinsic mRNA nature2012: -12	3.1004e-10	1	1
1	BRCA.ER Status nature2012: Positive	3.3919e-10	1	1
1	X PANCAN RPPA PANCAN K8: BRCA nonbasal-like c8	5.5941e-10	1	1
1	BRCA.PR Status nature2012: Positive	2.3501e-09	1	1
1	BRCA.breast carcinoma estrogen receptor status: Positive	8.0243e-09	1	1
1	new neoplasm event type:	1.1565e-08	1	1
1	BRCA.PAM50Call RNAseq: LumB	3.1849e-08	1	1
1	X PANCAN UNC RNAseq PANCAN K16: BRCA nonbasal-like c7	3.211e-08	1	1
1	BRCA.PAM50 mRNA nature2012: Luminal B	3.2517e-08	1	1
1	icd o 3 histology: 8523/3	1.6333e-07	1	1
1	BRCA.HER2 Final Status nature2012: Negative	2.0914e-07	1	1
1	X PANCAN DNAMethyl PANCAN: BRCA CIMP c7	2.7128e-07	1	1
1	BRCA.methylation Clusters nature2012: 3	3.0738e-07	1	1
1	BRCA.X PANCAN DNAMethyl BRCA: cluster 3	3.0738e-07	1	1
1	BLCA.diagnosis subtype: Papillary	4.1604e-07	1	1
1	BLCA.person concomitant prostate carcinoma pathologic t stage:	5.4307e-07	1	1
1	histological type: Mucinous Carcinoma	5.4308e-07	1	1
1	BRCA.breast carcinoma progesterone receptor status: Positive	5.9681e-07	1	1
1	X PANCAN Cluster Cluster PANCAN: C3-BRCA/Luminal	6.2997e-07	1	1
1	BRCA.cytokeratin immunohistochemistry staining method mcrmtstss ndctr: NO	6.7675e-07	1	1
1	BLCA.X PANCAN mirna BLCA:	7.7015e-07	1	1
1	BLCA.bladder carcinoma extracapsular extension status:	1.336e-06	1	1
1	BLCA.X PANCAN DNAMethyl BLCA:	1.5455e-06	1	1
1	BRCA.miRNA Clusters nature2012: 2	1.7631e-06	1	1
1	BRCA.X PANCAN mirna BRCA: cluster 2	1.7631e-06	1	1
1	BRCA.Gender nature2012: FEMALE	1.8464e-06	1	1
1	BLCA.induction course complete:	2.1334e-06	1	1
1	BLCA.maint therapy course complete:	2.1334e-06	1	1
1	primary lymph node presentation assessment:	2.1833e-06	1	1
1	BLCA.complete response observed:	2.2843e-06	1	1
1	BRCA.Integrated Clusters no exp nature2012: 4	2.342e-06	1	1
1	BRCA.miRNA Clusters nature2012: 1	2.3466e-06	1	1
1	BRCA.X PANCAN mirna BRCA: cluster 1	2.3466e-06	1	1
1	treat.anastrozole: 1	2.7297e-06	1	1
1	postoperative rx tx:	3.0156e-06	1	1
1	BRCA.Metastasis Coded nature2012: Negative	3.3309e-06	1	1
1	BRCA.Metastasis nature2012: M0	3.3309e-06	1	1
1	X anatomical origin: Bladder	3.9757e-06	1	1
1	X cohort: TCGA Bladder Cancer	3.9757e-06	1	1
1	X primary disease: bladder urothelial carcinoma	3.9757e-06	1	1
1	cancer type: BLCA	3.9757e-06	1	1
1	BLCA.hist of non mibc: NO	4.0224e-06	1	1
1	X PANCAN miRNA PANCAN: miRNA cluster 14	4.1866e-06	1	1
1	icd o 3 histology: 8130/3	4.9858e-06	1	1
1	BLCA.mibc 90day post resection bcg:	5.2933e-06	1	1
1	BLCA.non mibc tx:	9.6608e-06	1	1
1	treat.target.sex.hormone.signalling.inhibition: 1	1.1813e-05	1	1
1	BRCA.breast carcinoma immunohistochemistry prgstrn rcptr ps fndng scl:	1.2109e-05	1	1
1	BRCA.menopause status: Post (prior bilateral ovariectomy OR >12 mo since LMP with no prior hysterectomy)	1.221e-05	1	1
1	BLCA.additional treatment completion success outcome:	1.2536e-05	1	1
1	BRCA.Integrated Clusters with PAM50 nature2012: 4	1.5862e-05	1	1
1	BRCA.Survival Data Form nature2012: followup	2.2822e-05	1	1
1	pathologic T: T2a	2.3687e-05	1	1
1	additional surgery locoregional procedure:	2.6525e-05	1	1
1	residual disease post new tumor event margin status: NA	3.1167e-05	1	1
1	icd 10: C67.9	3.3233e-05	1	1
1	histological type: Muscle invasive urothelial carcinoma (pT2 or above)	3.7309e-05	1	1
1	tumor tissue site: Bladder	3.9662e-05	1	1
1	BRCA.lab procedure her2 neu in situ hybrid outcome type: Negative	4.8895e-05	1	1
1	X PANCAN miRNA PANCAN: miRNA cluster 6	5.1583e-05	1	1
1	icd o 3 histology: 8503/3	8.3505e-05	1	1
1	icd o 3 site: C67.9	8.6056e-05	1	1
1	anatomic neoplasm subdivision: Bladder - NOS	9.7005e-05	1	1
1	BRCA.lab proc her2 neu immunohistochemistry receptor status: Equivocal	0.00012727	1	1
1	BLCA.lymphovascular invasion present: NO	0.00015936	1	1
1	tissue source site: GV	0.0001747	1	1
1	BRCA.Node nature2012: N1	0.00019383	1	1
1	BLCA.chemical exposure text:	0.00020099	1	1
1	BRCA.Tumor T1 Coded nature2012: T_Other	0.00022116	1	1
1	BRCA.her2 immunohistochemistry level result: 2+	0.00023321	1	1
1	BLCA.person primary industry text:	0.00024969	1	1
1	BRCA.PAM50Call RNAseq: LumA	0.00027601	1	1
1	BLCA.person concomitant prostate carcinoma occurrence indicator: NO	0.00029587	1	1
1	neoplasm histologic grade: Low Grade	0.00030716	1	1
1	BLCA.disease extracapsular extension ind 3: NO	0.00030718	1	1
1	BRCA.OS event nature2012: 0	0.00034301	1	1
1	BRCA.Vital Status nature2012: LIVING	0.00034301	1	1
1	pathologic stage: Stage IIA	0.00040682	1	1
1	other metastatic involvement anatomic site:	0.00041654	1	1
1	histological type: Other specify	0.00047909	1	1
1	BRCA.immunohistochemistry positive cell score: 4+	0.0005439	1	1
1	BLCA.cancer diagnosis cancer type icd9 text name:	0.00057503	1	1
1	BLCA.family medical history relative family member relationship type:	0.00057503	1	1
1	BRCA.OS event nature2012: 1	0.00059059	1	1
1	BRCA.Vital Status nature2012: DECEASED	0.00059059	1	1
1	BRCA.breast carcinoma immunohistochemistry pos cell score: 4+	0.00062278	1	1
1	BLCA.person concomitant prostate carcinoma occurrence indicator:	0.00069589	1	1
1	COAD.AWG cancer type Oct62011: NA	0.00080594	1	1
1	COAD.braf gene analysis performed: NA	0.00080594	1	1
1	COAD.braf gene analysis result: NA	0.00080594	1	1
1	COAD.CDE ID 3226963: NA	0.00080594	1	1
1	COAD.CIMP: NA	0.00080594	1	1
1	COAD.colon polyps present: NA	0.00080594	1	1
1	COAD.history of colon polyps: NA	0.00080594	1	1
1	COAD.kras gene analysis performed: NA	0.00080594	1	1
1	COAD.kras mutation found: NA	0.00080594	1	1
1	COAD.loss expression of mismatch repair proteins by ihc: NA	0.00080594	1	1
1	COAD.loss expression of mismatch repair proteins by ihc result: NA	0.00080594	1	1
1	COAD.lymphatic invasion: NA	0.00080594	1	1
1	COAD.microsatellite instability: NA	0.00080594	1	1
1	COAD.MSI updated Oct62011: NA	0.00080594	1	1
1	COAD.non nodal tumor deposits: NA	0.00080594	1	1
1	COAD.perineural invasion present: NA	0.00080594	1	1
1	COAD.site of additional surgery new tumor event mets: NA	0.00080594	1	1
1	COAD.synchronous colon cancer present: NA	0.00080594	1	1
1	COAD.venous invasion: NA	0.00080594	1	1
1	COAD.X PANCAN mirna COAD: NA	0.00080594	1	1
1	BLCA.clinical T: T2	0.00093183	1	1
1	pathologic N: N0	0.00099788	1	1
1	BRCA.Node Coded nature2012: Negative	0.0010028	1	1
1	BRCA.Node nature2012: N0	0.0010028	1	1
1	BRCA.AJCC Stage nature2012: Stage IIA	0.0010955	1	1
1	tissue source site: FJ	0.001139	1	1
1	COAD.X: NA	0.0011552	1	1
1	BLCA.disease extracapsular extension ind 3:	0.0013798	1	1
1	BRCA.her2 erbb method calculation method text: 3+ Positive	0.001479	1	1
1	pathologic T: T2	0.0015804	1	1
1	initial pathologic diagnosis method:	0.0016777	1	1
1	BLCA.occupation primary job:	0.0017676	1	1
1	BRCA.methylation Clusters nature2012: 4	0.0017952	1	1
1	BRCA.X PANCAN DNAMethyl BRCA: cluster 4	0.0017952	1	1
1	BLCA.person occupation description text: retired	0.0019778	1	1
1	initial pathologic diagnosis method: Other method	specify:	0.0020742	1	1
1	tissue source site: CF	0.0024672	1	1
1	histological type other: infiltrating ductal and mucinous	0.0024851	1	1
1	THCA.i 131 subsequent administered dose: No	0.0024851	1	1
1	BLCA.occupation primary job: Truck driver	0.0024851	1	1
1	BLCA.person occupation description text: attorney	0.0024851	1	1
1	BRCA.Node Coded nature2012: Positive	0.0025031	1	1
1	BLCA.tobacco smoking history: Current reformed smoker for < or = 15 years	0.0025543	1	1
1	BRCA.Integrated Clusters no exp nature2012: 3	0.0026306	1	1
1	anatomic neoplasm subdivision: Left	0.0036704	1	1
1	BRCA.Converted Stage nature2012: Stage IIA	0.0039751	1	1
1	BRCA.Tumor nature2012: T2	0.0042046	1	1
1	BRCA.PAM50 mRNA nature2012: Luminal A	0.0046648	1	1
1	tissue source site: 4Z	0.0053273	1	1
1	BRCA.RPPA Clusters nature2012: LumA	0.0053459	1	1
1	new neoplasm event occurrence anatomic site: Bone	0.005484	1	1
1	X PANCAN miRNA PANCAN: miRNA cluster 12	0.0054888	1	1
1	BRCA.Integrated Clusters with PAM50 nature2012: 3	0.0057392	1	1
1	BRCA.CN Clusters nature2012: 5	0.005898	1	1
1	THCA.patient personal medical history thyroid gland disorder name: Nodular Hyperplasia	0.0060442	1	1
1	BRCA.er level cell percentage category: 90-99	0.0066022	1	1
1	BRCA.Converted Stage nature2012: No_Conversion	0.006638	1	1
1	pathologic T: T0	0.0072096	1	1
2	BRCA.AJCC Stage nature2012:	0	1	1
2	BRCA.Converted Stage nature2012:	0	1	1
2	BRCA.ER Status nature2012:	0	1	1
2	BRCA.Gender nature2012:	0	1	1
2	BRCA.HER2 Final Status nature2012:	0	1	1
2	BRCA.Metastasis Coded nature2012:	0	1	1
2	BRCA.Metastasis nature2012:	0	1	1
2	BRCA.Node Coded nature2012:	0	1	1
2	BRCA.Node nature2012:	0	1	1
2	BRCA.PAM50Call RNAseq:	0	1	1
2	BRCA.PR Status nature2012:	0	1	1
2	BRCA.Survival Data Form nature2012:	0	1	1
2	BRCA.Tumor nature2012:	0	1	1
2	BRCA.Tumor T1 Coded nature2012:	0	1	1
2	BRCA.Vital Status nature2012:	0	1	1
2	BRCA.X PANCAN DNAMethyl BRCA:	0	1	1
2	BRCA.X PANCAN mirna BRCA:	3.2307e-14	1	1
2	X PANCAN DNAMethyl PANCAN:	3.0809e-13	1	1
2	X PANCAN CNA PANCAN K8:	1.6006e-12	1	1
2	BRCA.methylation Clusters nature2012: NA	4.2096e-11	1	1
2	X PANCAN miRNA PANCAN:	6.1801e-11	1	1
2	BRCA.OS event nature2012: NA	8.392e-11	1	1
2	BRCA.CN Clusters nature2012: NA	1.6927e-10	1	1
2	BRCA.miRNA Clusters nature2012: NA	1.9237e-09	1	1
2	lost follow up: NO	8.1068e-09	1	1
2	BRCA.PAM50 mRNA nature2012:	1.0503e-08	1	1
2	X PANCAN UNC RNAseq PANCAN K16:	1.8092e-08	1	1
2	followup case report form submission reason:	1.9707e-08	1	1
2	targeted molecular therapy:	1.6155e-07	1	1
2	COAD.AWG cancer type Oct62011: NA	2.0733e-07	1	1
2	COAD.braf gene analysis performed: NA	2.0733e-07	1	1
2	COAD.braf gene analysis result: NA	2.0733e-07	1	1
2	COAD.CDE ID 3226963: NA	2.0733e-07	1	1
2	COAD.CIMP: NA	2.0733e-07	1	1
2	COAD.colon polyps present: NA	2.0733e-07	1	1
2	COAD.history of colon polyps: NA	2.0733e-07	1	1
2	COAD.kras gene analysis performed: NA	2.0733e-07	1	1
2	COAD.kras mutation found: NA	2.0733e-07	1	1
2	COAD.loss expression of mismatch repair proteins by ihc: NA	2.0733e-07	1	1
2	COAD.loss expression of mismatch repair proteins by ihc result: NA	2.0733e-07	1	1
2	COAD.lymphatic invasion: NA	2.0733e-07	1	1
2	COAD.microsatellite instability: NA	2.0733e-07	1	1
2	COAD.MSI updated Oct62011: NA	2.0733e-07	1	1
2	COAD.non nodal tumor deposits: NA	2.0733e-07	1	1
2	COAD.perineural invasion present: NA	2.0733e-07	1	1
2	COAD.site of additional surgery new tumor event mets: NA	2.0733e-07	1	1
2	COAD.synchronous colon cancer present: NA	2.0733e-07	1	1
2	COAD.venous invasion: NA	2.0733e-07	1	1
2	COAD.X PANCAN mirna COAD: NA	2.0733e-07	1	1
2	BRCA.SigClust Intrinsic mRNA nature2012: NA	3.7035e-07	1	1
2	BRCA.SigClust Unsupervised mRNA nature2012: NA	3.7035e-07	1	1
2	system version: 7th	3.8588e-07	1	1
2	X PANCAN Cluster Cluster PANCAN:	5.3184e-07	1	1
2	primary therapy outcome success: NA	3.195e-06	1	1
2	BRCA.RPPA Clusters nature2012:	4.2885e-06	1	1
2	X PANCAN RPPA PANCAN K8:	7.6866e-06	1	1
2	BRCA.breast carcinoma immunohistochemistry er pos finding scale: 3 Point Scale	1.2734e-05	1	1
2	X PANCAN mutation PANCAN:	1.6677e-05	1	1
2	BRCA.breast carcinoma immunohistochemistry prgstrn rcptr ps fndng scl: 3 Point Scale	2.999e-05	1	1
2	pathologic M: MX	3.1457e-05	1	1
2	postoperative rx tx: YES	3.4595e-05	1	1
2	COAD.X: NA	0.00010842	1	1
2	treat.patientBestResp: Complete Response	0.00016966	1	1
2	BRCA.Integrated Clusters no exp nature2012: NA	0.00022571	1	1
2	BRCA.Integrated Clusters unsup exp nature2012: NA	0.00022571	1	1
2	BRCA.Integrated Clusters with PAM50 nature2012: NA	0.00022571	1	1
2	pathologic T: T2	0.0002721	1	1
2	LIHC.viral hepatitis serology:	0.00031485	1	1
2	new neoplasm event occurrence anatomic site:	0.0004607	1	1
2	icd o 3 histology: 8170/3	0.00053563	1	1
2	X RFS IND: 0	0.00063391	1	1
2	histological type: Hepatocellular Carcinoma	0.00069129	1	1
2	tissue source site: DD	0.00071828	1	1
2	new tumor event after initial treatment: NO	0.00075281	1	1
2	icd 10: C22.0	0.0010242	1	1
2	icd o 3 site: C22.0	0.0010242	1	1
2	tumor tissue site: Liver	0.0010744	1	1
2	LIHC.initial weight: 210	0.001139	1	1
2	LIHC.surgical procedure name other specify text:	0.0013395	1	1
2	LIHC.history hepato carcinoma risk factor: (Multiple)	0.0015544	1	1
2	eastern cancer oncology group: 1	0.0015743	1	1
2	initial pathologic diagnosis method: Core needle biopsy	0.0016213	1	1
2	BRCA.distant metastasis present ind2:	0.0017347	1	1
2	treat.paclitaxel: 1	0.0020034	1	1
2	LIHC.liver fibrosis ishak score category: 0 - No Fibrosis	0.0021672	1	1
2	tissue source site: KS	0.0021735	1	1
2	X anatomical origin: Liver	0.0022278	1	1
2	X cohort: TCGA Liver Cancer	0.0022278	1	1
2	X primary disease: liver hepatocellular carcinoma	0.0022278	1	1
2	cancer type: LIHC	0.0022278	1	1
2	tissue source site: ES	0.0024851	1	1
2	icd o 3 histology: 8520/3	0.0026042	1	1
2	LIHC.ablation embolization tx adjuvant:	0.0028706	1	1
2	BRCA.er level cell percentage category: 90-99	0.0030687	1	1
2	BRCA.surgical procedure purpose other text:	0.0032199	1	1
2	BRCA.breast carcinoma immunohistochemistry pos cell score: 1+	0.0043591	1	1
2	radiation therapy: YES	0.0046844	1	1
2	histological type other:	0.0049039	1	1
2	histological type: Infiltrating Lobular Carcinoma	0.0057094	1	1
2	BRCA.immunohistochemistry positive cell score: 3+	0.0057099	1	1
2	BRCA.lab proc her2 neu immunohistochemistry receptor status:	0.0067236	1	1
3	additional surgery metastatic procedure:	0	1	1
3	BRCA.axillary lymph node stage other method descriptive text:	0	1	1
3	BRCA.breast cancer surgery margin status:	0	1	1
3	BRCA.breast carcinoma estrogen receptor status: Negative	0	1	1
3	BRCA.breast carcinoma immunohistochemistry er pos finding scale:	0	1	1
3	BRCA.breast carcinoma immunohistochemistry pos cell score:	0	1	1
3	BRCA.breast carcinoma immunohistochemistry prgstrn rcptr ps fndng scl:	0	1	1
3	BRCA.breast carcinoma primary surgical procedure name:	0	1	1
3	BRCA.breast carcinoma progesterone receptor status: Negative	0	1	1
3	BRCA.breast carcinoma surgical procedure name: Lumpectomy	0	1	1
3	BRCA.breast neoplasm other surgical procedure descriptive text:	0	1	1
3	BRCA.CN Clusters nature2012: 1	0	1	1
3	BRCA.cytokeratin immunohistochemistry staining method mcrmtstss ndctr: NO	0	1	1
3	disease code:	0	1	1
3	BRCA.distant metastasis present ind2:	0	1	1
3	BRCA.er detection method text:	0	1	1
3	BRCA.er level cell percentage category:	0	1	1
3	BRCA.er level cell percentage category: <10	0	1	1
3	BRCA.ER Status nature2012: Negative	0	1	1
3	BRCA.first nonlymph node metastasis anatomic site:	0	1	1
3	BRCA.first recurrent non nodal metastatic anatomic site descriptv txt:	0	1	1
3	followup treatment success: NA	0	1	1
3	gender: FEMALE	0	1	1
3	BRCA.Gender nature2012: FEMALE	0	1	1
3	BRCA.her2 and centromere 17 positive finding other measuremnt scl txt:	0	1	1
3	BRCA.her2 erbb method calculation method text:	0	1	1
3	BRCA.her2 erbb pos finding cell percent category:	0	1	1
3	BRCA.her2 erbb pos finding fluorescence n st hybrdztn clcltn mthd txt:	0	1	1
3	BRCA.HER2 Final Status nature2012: Negative	0	1	1
3	BRCA.her2 immunohistochemistry level result:	0	1	1
3	histological type: Infiltrating Ductal Carcinoma	0	1	1
3	histological type other:	0	1	1
3	icd 10: C50.9	0	1	1
3	icd o 3 histology: 8500/3	0	1	1
3	icd o 3 site: C50.9	0	1	1
3	BRCA.immunohistochemistry positive cell score:	0	1	1
3	initial pathologic diagnosis method: Core needle biopsy	0	1	1
3	init pathology dx method other:	0	1	1
3	BRCA.Integrated Clusters no exp nature2012: 2	0	1	1
3	BRCA.Integrated Clusters unsup exp nature2012: 2	0	1	1
3	BRCA.Integrated Clusters with PAM50 nature2012: 2	0	1	1
3	BRCA.lab procedure her2 neu in situ hybrid outcome type:	0	1	1
3	BRCA.lab proc her2 neu immunohistochemistry receptor status: Negative	0	1	1
3	malignant neoplasm metastatic involvement site: NA	0	1	1
3	BRCA.margin status: Negative	0	1	1
3	BRCA.Metastasis Coded nature2012: Negative	0	1	1
3	BRCA.Metastasis nature2012: M0	0	1	1
3	BRCA.metastatic breast carcinm ps fndng prgstrn rcptr thr msr scl txt:	0	1	1
3	BRCA.metastatic breast carcinoma erbb2 immunohistochemistry levl rslt:	0	1	1
3	BRCA.metastatic breast carcinoma estrogen receptor detection mthd txt:	0	1	1
3	BRCA.metastatic breast carcinoma estrogen receptor status:	0	1	1
3	BRCA.metastatic breast carcinoma estrogen receptr lvl cll prcnt ctgry:	0	1	1
3	BRCA.metastatic breast carcinoma her2 erbb method calculatin mthd txt:	0	1	1
3	BRCA.metastatic breast carcinoma her2 erbb pos findng cll prcnt ctgry:	0	1	1
3	BRCA.metastatic breast carcinoma immunhstchmstry r pstv fndng scl typ:	0	1	1
3	BRCA.metastatic breast carcinoma immunohistochemistry er pos cell scr:	0	1	1
3	BRCA.metastatic breast carcinoma immunohistochemistry pr pos cell scr:	0	1	1
3	BRCA.metastatic breast carcinoma lab proc hr2 n n st hybrdztn tcm typ:	0	1	1
3	BRCA.metastatic breast carcinoma pos finding hr2 rbb2 thr msr scl txt:	0	1	1
3	BRCA.metastatic breast carcinoma progestern rcptr lvl cll prcnt ctgry:	0	1	1
3	BRCA.metastatic breast carcinoma progesterone receptor dtctn mthd txt:	0	1	1
3	BRCA.metastatic breast carcinoma progesterone receptor status:	0	1	1
3	BRCA.metastatic breast carcinom lb prc hr2 n mmnhstchmstry rcptr stts:	0	1	1
3	BRCA.methylation Clusters nature2012: 5	0	1	1
3	BRCA.miRNA Clusters nature2012: 5	0	1	1
3	BRCA.mtsttc brst crcnm hr2 rbb ps fndng flrscnc n st hybrdztn clcltn:	0	1	1
3	BRCA.mtsttc brst crcnm mmnhstchmstry prgstrn rcptr pstv fndng scl typ:	0	1	1
3	neoplasm histologic grade: NA	0	1	1
3	BRCA.Node Coded nature2012: Negative	0	1	1
3	BRCA.Node nature2012: N0	0	1	1
3	BRCA.OS event nature2012: 0	0	1	1
3	other metastatic involvement anatomic site: NA	0	1	1
3	BRCA.PAM50Call RNAseq: Basal	0	1	1
3	BRCA.PAM50 mRNA nature2012:	0	1	1
3	BRCA.PAM50 mRNA nature2012: Basal-like	0	1	1
3	pathologic stage: Stage IIA	0	1	1
3	pathologic T: T2	0	1	1
3	BRCA.pgr detection method text:	0	1	1
3	BRCA.pos finding her2 erbb2 other measurement scale text:	0	1	1
3	BRCA.pos finding metastatic brst crcnm strgn rcptr thr msrmnt scl txt:	0	1	1
3	BRCA.pos finding progesterone receptor other measurement scale text:	0	1	1
3	BRCA.positive finding estrogen receptor other measurement scale text:	0	1	1
3	postoperative rx tx:	0	1	1
3	primary therapy outcome success: NA	0	1	1
3	BRCA.progesterone receptor level cell percent category:	0	1	1
3	BRCA.progesterone receptor level cell percent category: <10	0	1	1
3	project code:	0	1	1
3	BRCA.PR Status nature2012: Negative	0	1	1
3	residual tumor: NA	0	1	1
3	BRCA.RPPA Clusters nature2012: Basal	0	1	1
3	BRCA.SigClust Intrinsic mRNA nature2012: -13	0	1	1
3	BRCA.SigClust Unsupervised mRNA nature2012: -12	0	1	1
3	BRCA.SigClust Unsupervised mRNA nature2012: 0	0	1	1
3	BRCA.surgical procedure purpose other text:	0	1	1
3	BRCA.Survival Data Form nature2012: enrollment	0	1	1
3	tissue source site: NA	0	1	1
3	treat.cyclophosphamide: 1	0	1	1
3	treat.doxorubicin: 1	0	1	1
3	treat.paclitaxel: 1	0	1	1
3	treat.target.microtubule: 1	0	1	1
3	treat.target.topoisomerase.inhibitor: 1	0	1	1
3	BRCA.Tumor nature2012: T2	0	1	1
3	BRCA.Tumor T1 Coded nature2012: T_Other	0	1	1
3	tumor tissue site: Breast	0	1	1
3	BRCA.Vital Status nature2012: LIVING	0	1	1
3	X anatomical origin: Breast	0	1	1
3	X cohort: TCGA Breast Cancer	0	1	1
3	X PANCAN Cluster Cluster PANCAN: C4-BRCA/Basal	0	1	1
3	X PANCAN CNA PANCAN K8: High	0	1	1
3	BRCA.X PANCAN DNAMethyl BRCA: cluster 5	0	1	1
3	X PANCAN DNAMethyl PANCAN: BRCA basal-like c8	0	1	1
3	BRCA.X PANCAN mirna BRCA:	0	1	1
3	BRCA.X PANCAN mirna BRCA: cluster 5	0	1	1
3	X PANCAN mutation PANCAN: mutation cluster 5	0	1	1
3	X PANCAN RPPA PANCAN K8: BRCA basal-like c6	0	1	1
3	X PANCAN UNC RNAseq PANCAN K16: BRCA basal-like c8	0	1	1
3	X primary disease: breast invasive carcinoma	0	1	1
3	cancer type: BRCA	0	1	1
3	new tumor event additional surgery procedure:	1.1102e-16	1	1
3	X PANCAN miRNA PANCAN: miRNA cluster 12	1.1102e-16	1	1
3	BRCA.axillary lymph node stage method type: Axillary lymph node dissection alone	1.2212e-15	1	1
3	residual disease post new tumor event margin status: NA	1.6653e-15	1	1
3	BRCA.Converted Stage nature2012: Stage IIA	3.2196e-15	1	1
3	BRCA.AJCC Stage nature2012: Stage IIA	8.4377e-15	1	1
3	pathologic M: M0	1.4766e-14	1	1
3	BRCA.axillary lymph node stage method type: Sentinel node biopsy alone	2.8422e-14	1	1
3	new neoplasm event occurrence anatomic site:	9.1926e-14	1	1
3	LGG.animal insect allergy history: NA	2.6856e-13	1	1
3	LGG.animal insect allergy types: NA	2.6856e-13	1	1
3	LGG.asthma history: NA	2.6856e-13	1	1
3	LGG.eczema history: NA	2.6856e-13	1	1
3	LGG.family history of cancer: NA	2.6856e-13	1	1
3	LGG.family history of primary brain tumor: NA	2.6856e-13	1	1
3	LGG.first diagnosis age asth ecz hay fev mold dust: NA	2.6856e-13	1	1
3	LGG.first diagnosis age of animal insect allergy: NA	2.6856e-13	1	1
3	LGG.first diagnosis age of food allergy: NA	2.6856e-13	1	1
3	LGG.first presenting symptom: NA	2.6856e-13	1	1
3	LGG.first presenting symptom longest duration: NA	2.6856e-13	1	1
3	LGG.food allergy history: NA	2.6856e-13	1	1
3	LGG.food allergy types: NA	2.6856e-13	1	1
3	LGG.hay fever history: NA	2.6856e-13	1	1
3	LGG.headache history: NA	2.6856e-13	1	1
3	LGG.history ionizing rt to head: NA	2.6856e-13	1	1
3	LGG.inherited genetic syndrome found: NA	2.6856e-13	1	1
3	LGG.inherited genetic syndrome result: NA	2.6856e-13	1	1
3	LGG.laterality: NA	2.6856e-13	1	1
3	LGG.ldh1 mutation found: NA	2.6856e-13	1	1
3	LGG.ldh1 mutation tested: NA	2.6856e-13	1	1
3	LGG.ldh1 mutation test method: NA	2.6856e-13	1	1
3	LGG.mental status changes: NA	2.6856e-13	1	1
3	LGG.mold or dust allergy history: NA	2.6856e-13	1	1
3	LGG.motor movement changes: NA	2.6856e-13	1	1
3	LGG.performance status scale timing: NA	2.6856e-13	1	1
3	LGG.preoperative antiseizure meds: NA	2.6856e-13	1	1
3	LGG.preoperative corticosteroids: NA	2.6856e-13	1	1
3	BRCA.breast carcinoma immunohistochemistry pos cell score: 0	4.0423e-13	1	1
3	LGG.seizure history: NA	4.6685e-13	1	1
3	LGG.sensory changes: NA	4.6685e-13	1	1
3	LGG.supratentorial localization: NA	4.6685e-13	1	1
3	LGG.tumor location: NA	4.6685e-13	1	1
3	THCA.braf gene genotyping outcome lab results text: NA	5.278e-13	1	1
3	THCA.extrathyroid carcinoma present extension status: NA	5.278e-13	1	1
3	THCA.first degree relative history thyrd glnd crcnm dgnss rltnshp typ: NA	5.278e-13	1	1
3	THCA.genotype analysis performed indicator: NA	5.278e-13	1	1
3	THCA.genotyping results gene mutation not reported reason: NA	5.278e-13	1	1
3	THCA.histologic disease progression present indicator: NA	5.278e-13	1	1
3	THCA.histologic disease progression present type: NA	5.278e-13	1	1
3	THCA.i 131 first administered dose: NA	5.278e-13	1	1
3	THCA.i 131 subsequent administered dose: NA	5.278e-13	1	1
3	THCA.i 131 total administered dose: NA	5.278e-13	1	1
3	THCA.i 131 total administered preparation technique: NA	5.278e-13	1	1
3	THCA.lymph node preoperative assessment diagnostic imaging type: NA	5.278e-13	1	1
3	THCA.lymph node preoperative scan indicator: NA	5.278e-13	1	1
3	THCA.metastatic neoplasm confirmed diagnosis method name: NA	5.278e-13	1	1
3	THCA.metastatic neoplasm confirmed diagnosis method text: NA	5.278e-13	1	1
3	THCA.new neoplasm confirmed diagnosis method name: NA	5.278e-13	1	1
3	THCA.other genotyping outcome lab results text: NA	5.278e-13	1	1
3	THCA.patient personal medical history thyroid gland disorder name: NA	5.278e-13	1	1
3	THCA.patient personal medical history thyroid other specify text: NA	5.278e-13	1	1
3	THCA.person lifetime risk radiation exposure indicator: NA	5.278e-13	1	1
3	THCA.post surgical procedure assessment thyroid gland carcinoma stats: NA	5.278e-13	1	1
3	THCA.primary neoplasm focus type: NA	5.278e-13	1	1
3	THCA.primary thyroid gland neoplasm location anatomic site: NA	5.278e-13	1	1
3	THCA.radiation therapy administered dose text: NA	5.278e-13	1	1
3	THCA.radiation therapy administered preparation technique text: NA	5.278e-13	1	1
3	THCA.radiosensitizing agent administered indicator: NA	5.278e-13	1	1
3	THCA.ras family gene genotyping outcome lab results text: NA	5.278e-13	1	1
3	THCA.ret ptc rearrangement genotyping outcome lab results text: NA	5.278e-13	1	1
3	THCA.therapeutic procedure new neoplasm required additional thrpy typ: NA	5.278e-13	1	1
3	THCA.thyroid gland carcinoma involvement regional lymph node type: NA	5.278e-13	1	1
3	initial pathologic diagnosis method: Tumor resection	6.0307e-13	1	1
3	new neoplasm occurrence anatomic site text:	9.1471e-13	1	1
3	treat.temozolomide: 0	1.0262e-12	1	1
3	treat.docetaxel: 1	1.0386e-12	1	1
3	primary lymph node presentation assessment:	1.1503e-12	1	1
3	targeted molecular therapy: YES	2.9897e-12	1	1
3	LGG.visual changes: NA	6.3801e-12	1	1
3	treat.target.DNA.damaging: 1	1.254e-11	1	1
3	BRCA.lab procedure her2 neu in situ hybrid outcome type: Negative	1.4334e-11	1	1
3	pathologic stage: Stage IIB	3.8099e-11	1	1
3	BRCA.her2 erbb pos finding cell percent category: <10	4.5941e-11	1	1
3	BRCA.Survival Data Form nature2012: followup	6.3345e-11	1	1
3	BRCA.cytokeratin immunohistochemistry staining method mcrmtstss ndctr: YES	7.1126e-11	1	1
3	eastern cancer oncology group: NA	7.5187e-11	1	1
3	system version:	9.8021e-11	1	1
3	treat.target.sex.hormone.signalling.inhibition: 0	1.6909e-10	1	1
3	BRCA.er detection method text: Allred score 0+0 = 0	1.7913e-10	1	1
3	BRCA.immunohistochemistry positive cell score: 0	1.7913e-10	1	1
3	BRCA.positive finding estrogen receptor other measurement scale text: Allred score = 0	1.7913e-10	1	1
3	BRCA.her2 immunohistochemistry level result: 1+	1.8627e-10	1	1
3	BRCA.Converted Stage nature2012: No_Conversion	2.5019e-10	1	1
3	BRCA.pgr detection method text: Allred score 0+0 = 0	4.5727e-10	1	1
3	BRCA.pos finding progesterone receptor other measurement scale text: Allred score = 0	4.5727e-10	1	1
3	pathologic N: N0 (i-)	5.4978e-10	1	1
3	BRCA.miRNA Clusters nature2012: 3	1.0911e-09	1	1
3	BRCA.X PANCAN mirna BRCA: cluster 3	1.0911e-09	1	1
3	BRCA.axillary lymph node stage method type: Sentinel lymph node biopsy plus axillary dissection	1.2924e-09	1	1
3	BRCA.breast carcinoma surgical procedure name: Modified Radical Mastectomy	1.3826e-09	1	1
3	anatomic neoplasm subdivision: Left Upper Outer Quadrant	1.5776e-09	1	1
3	X PANCAN miRNA PANCAN: miRNA cluster 7	2.1402e-09	1	1
3	BRCA.her2 immunohistochemistry level result: 0	4.499e-09	1	1
3	BLCA.additional treatment completion success outcome: NA	4.9283e-09	1	1
3	BLCA.bladder carcinoma extracapsular extension status: NA	4.9283e-09	1	1
3	BLCA.cancer diagnosis cancer type icd9 text name: NA	4.9283e-09	1	1
3	BLCA.chemical exposure text: NA	4.9283e-09	1	1
3	BLCA.clinical T: NA	4.9283e-09	1	1
3	BLCA.complete response observed: NA	4.9283e-09	1	1
3	BLCA.diagnosis subtype: NA	4.9283e-09	1	1
3	BLCA.disease extracapsular extension ind 3: NA	4.9283e-09	1	1
3	BLCA.family medical history relative family member relationship type: NA	4.9283e-09	1	1
3	BLCA.hist of non mibc: NA	4.9283e-09	1	1
3	BLCA.induction course complete: NA	4.9283e-09	1	1
3	BLCA.lymphovascular invasion present: NA	4.9283e-09	1	1
3	BLCA.maint therapy course complete: NA	4.9283e-09	1	1
3	BLCA.mibc 90day post resection bcg: NA	4.9283e-09	1	1
3	BLCA.non mibc tx: NA	4.9283e-09	1	1
3	BLCA.occupation primary job: NA	4.9283e-09	1	1
3	BLCA.person concomitant prostate carcinoma occurrence indicator: NA	4.9283e-09	1	1
3	BLCA.person concomitant prostate carcinoma pathologic t stage: NA	4.9283e-09	1	1
3	BLCA.person occupation description text: NA	4.9283e-09	1	1
3	BLCA.person primary industry text: NA	4.9283e-09	1	1
3	BLCA.X PANCAN DNAMethyl BLCA: NA	4.9283e-09	1	1
3	BLCA.X PANCAN mirna BLCA: NA	4.9283e-09	1	1
3	BLCA.tobacco smoking history: NA	6.172e-09	1	1
3	BRCA.lab proc her2 neu immunohistochemistry receptor status:	8.8045e-09	1	1
3	treat.oxaliplatin: 0	1.2645e-08	1	1
3	treat.tamoxifen: 0	1.5778e-08	1	1
3	treat.leucovorin: 0	1.6625e-08	1	1
3	treat.cisplatin: 0	2.455e-08	1	1
3	BRCA.menopause status: Pre (<6 months since LMP AND no prior bilateral ovariectomy AND not on estrogen replacement)	3.4229e-08	1	1
3	treat.anastrozole: 0	3.4404e-08	1	1
3	treat.letrozole: 0	4.3803e-08	1	1
3	treat.lomustine: 0	6.595e-08	1	1
3	treat.methotrexate: 0	7.1934e-08	1	1
3	treat.gemcitabine: 0	7.7173e-08	1	1
3	treat.irinotecan: 0	7.8443e-08	1	1
3	treat.levothyroxine: 0	7.8443e-08	1	1
3	treat.target.angiogenesis.signalling.inhibitor: 0	1.153e-07	1	1
3	treat.sorafenib: 0	1.1548e-07	1	1
3	treat.procarbazine: 0	1.3122e-07	1	1
3	new neoplasm event type:	1.5839e-07	1	1
3	treat.vincristine: 0	1.6218e-07	1	1
3	treat.target.growth.signalling.inhibitor: 0	1.9377e-07	1	1
3	COAD.AWG cancer type Oct62011: NA	2.0733e-07	1	1
3	COAD.braf gene analysis performed: NA	2.0733e-07	1	1
3	COAD.braf gene analysis result: NA	2.0733e-07	1	1
3	COAD.CDE ID 3226963: NA	2.0733e-07	1	1
3	COAD.CIMP: NA	2.0733e-07	1	1
3	COAD.colon polyps present: NA	2.0733e-07	1	1
3	COAD.history of colon polyps: NA	2.0733e-07	1	1
3	COAD.kras gene analysis performed: NA	2.0733e-07	1	1
3	COAD.kras mutation found: NA	2.0733e-07	1	1
3	COAD.loss expression of mismatch repair proteins by ihc: NA	2.0733e-07	1	1
3	COAD.loss expression of mismatch repair proteins by ihc result: NA	2.0733e-07	1	1
3	COAD.lymphatic invasion: NA	2.0733e-07	1	1
3	COAD.microsatellite instability: NA	2.0733e-07	1	1
3	COAD.MSI updated Oct62011: NA	2.0733e-07	1	1
3	COAD.non nodal tumor deposits: NA	2.0733e-07	1	1
3	COAD.perineural invasion present: NA	2.0733e-07	1	1
3	COAD.site of additional surgery new tumor event mets: NA	2.0733e-07	1	1
3	COAD.synchronous colon cancer present: NA	2.0733e-07	1	1
3	COAD.venous invasion: NA	2.0733e-07	1	1
3	COAD.X PANCAN mirna COAD: NA	2.0733e-07	1	1
3	treat.carmustine: 0	2.0868e-07	1	1
3	treat.etoposide: 0	2.0868e-07	1	1
3	treat.goserelin: 0	2.1759e-07	1	1
3	treat.vinblastine: 0	2.2687e-07	1	1
3	treat.liothyronine: 0	2.3652e-07	1	1
3	treat.target.other: 0	2.4658e-07	1	1
3	treat.target.immunosuppressor: 0	2.5704e-07	1	1
3	treat.cetuximab: 0	2.7927e-07	1	1
3	treat.fulvestrant: 0	2.9107e-07	1	1
3	treat.ifosfamide: 0	2.9107e-07	1	1
3	treat.celecoxib: 0	3.0335e-07	1	1
3	treat.leuprolide: 0	3.0335e-07	1	1
3	icd o 3 site: C50.4	3.0738e-07	1	1
3	treat.target.support: 0	3.0833e-07	1	1
3	treat.bcg: 0	3.1613e-07	1	1
3	treat.target.immuno.targetting: 0	3.1613e-07	1	1
3	treat.hydroxyurea: 0	3.2943e-07	1	1
3	treat.exemestane: 0	3.3341e-07	1	1
3	treat.imatinib: 0	3.4327e-07	1	1
3	treat.mitomycin: 0	3.4327e-07	1	1
3	treat.pamidronate: 0	3.4327e-07	1	1
3	treat.target.anti.bacterial...anti.parasite: 0	3.4327e-07	1	1
3	treat.dexamethasone: 0	3.5766e-07	1	1
3	treat.everolimus: 0	3.5766e-07	1	1
3	treat.floxuridine: 0	3.5766e-07	1	1
3	treat.i131.81c6: 0	3.5766e-07	1	1
3	treat.isotretinoin: 0	3.5766e-07	1	1
3	treat.karenitecin: 0	3.5766e-07	1	1
3	treat.lapatinib: 0	3.5766e-07	1	1
3	treat.target.pro.cell.death: 0	3.5766e-07	1	1
3	treat.triptorelin: 0	3.5766e-07	1	1
3	treat.cilengitide: 0	3.7264e-07	1	1
3	treat.erlotinib: 0	3.7264e-07	1	1
3	treat.fotemustine: 0	3.7264e-07	1	1
3	treat.halichondrin.b: 0	3.7264e-07	1	1
3	treat.mitoxantrone: 0	3.7264e-07	1	1
3	treat.regorafenib: 0	3.7264e-07	1	1
3	treat.target.anti.immuno.evasion: 0	3.7264e-07	1	1
3	treat.target.DNA.repair.inhibition: 0	3.7264e-07	1	1
3	treat.target.immuno.stimmulation: 0	3.7264e-07	1	1
3	treat.temsirolimus: 0	3.7264e-07	1	1
3	treat.teniposide: 0	3.7264e-07	1	1
3	treat.veliparib: 0	3.7264e-07	1	1
3	treat.afatinib: 0	3.8822e-07	1	1
3	treat.bortezomib: 0	3.8822e-07	1	1
3	treat.filgrastim: 0	3.8822e-07	1	1
3	treat.fosaprepitant: 0	3.8822e-07	1	1
3	treat.green.tea.polyphenol.extract: 0	3.8822e-07	1	1
3	treat.ibandronate: 0	3.8822e-07	1	1
3	treat.ipilimumab: 0	3.8822e-07	1	1
3	treat.ixabepilone: 0	3.8822e-07	1	1
3	treat.megestrol: 0	3.8822e-07	1	1
3	treat.metformin: 0	3.8822e-07	1	1
3	treat.nimustine: 0	3.8822e-07	1	1
3	treat.nivolumab: 0	3.8822e-07	1	1
3	treat.pembrolizumab: 0	3.8822e-07	1	1
3	treat.pemetrexed: 0	3.8822e-07	1	1
3	treat.prednisone: 0	3.8822e-07	1	1
3	treat.rituximab: 0	3.8822e-07	1	1
3	treat.sunitinib: 0	3.8822e-07	1	1
3	treat.target.epigenetics: 0	3.8822e-07	1	1
3	treat.tesetaxel: 0	3.8822e-07	1	1
3	treat.thalidomide: 0	3.8822e-07	1	1
3	treat.topotecan: 0	3.8822e-07	1	1
3	treat.trabectedin: 0	3.8822e-07	1	1
3	treat.vandetanib: 0	3.8822e-07	1	1
3	treat.vorinostat: 0	3.8822e-07	1	1
3	treat.abiraterone: 0	4.0443e-07	1	1
3	treat.actinomycin.d: 0	4.0443e-07	1	1
3	treat.aee788: 0	4.0443e-07	1	1
3	treat.aflibercept: 0	4.0443e-07	1	1
3	treat.amg.102: 0	4.0443e-07	1	1
3	treat.amino.acid: 0	4.0443e-07	1	1
3	treat.angiocept: 0	4.0443e-07	1	1
3	treat.antineoplastons: 0	4.0443e-07	1	1
3	treat.ap23573: 0	4.0443e-07	1	1
3	treat.arsenic.trioxide: 0	4.0443e-07	1	1
3	treat.axitinib: 0	4.0443e-07	1	1
3	treat.belinostat: 0	4.0443e-07	1	1
3	treat.bicalutamide: 0	4.0443e-07	1	1
3	treat.bleomycin: 0	4.0443e-07	1	1
3	treat.cabazitaxel: 0	4.0443e-07	1	1
3	treat.cabozantinib: 0	4.0443e-07	1	1
3	treat.cancer.vaccine: 0	4.0443e-07	1	1
3	treat.cediranib: 0	4.0443e-07	1	1
3	treat.chloroquine: 0	4.0443e-07	1	1
3	treat.ci.980: 0	4.0443e-07	1	1
3	treat.ciclosporin: 0	4.0443e-07	1	1
3	treat.cis.retinoic.acid: 0	4.0443e-07	1	1
3	treat.cyc116: 0	4.0443e-07	1	1
3	treat.dabrafenib: 0	4.0443e-07	1	1
3	treat.dacarbazine: 0	4.0443e-07	1	1
3	treat.daclizumab: 0	4.0443e-07	1	1
3	treat.dcvax: 0	4.0443e-07	1	1
3	treat.degarelix: 0	4.0443e-07	1	1
3	treat.diphenylcyclopropenone: 0	4.0443e-07	1	1
3	treat.enzastaurin: 0	4.0443e-07	1	1
3	treat.erythropoietin: 0	4.0443e-07	1	1
3	treat.estramustine: 0	4.0443e-07	1	1
3	treat.fenretinide: 0	4.0443e-07	1	1
3	treat.gefitinib: 0	4.0443e-07	1	1
3	treat.gp100: 0	4.0443e-07	1	1
3	treat.hsppc.96: 0	4.0443e-07	1	1
3	treat.hydroxychloroquine: 0	4.0443e-07	1	1
3	treat.ict.107: 0	4.0443e-07	1	1
3	treat.il.13pe: 0	4.0443e-07	1	1
3	treat.il.18: 0	4.0443e-07	1	1
3	treat.il.2: 0	4.0443e-07	1	1
3	treat.imiquimod: 0	4.0443e-07	1	1
3	treat.iniparib: 0	4.0443e-07	1	1
3	treat.interferon.alpha: 0	4.0443e-07	1	1
3	treat.ketoconazole: 0	4.0443e-07	1	1
3	treat.levetiracetam: 0	4.0443e-07	1	1
3	treat.lonafarnib: 0	4.0443e-07	1	1
3	treat.mab.i.131: 0	4.0443e-07	1	1
3	treat.mage.3.vaccine: 0	4.0443e-07	1	1
3	treat.marimastat: 0	4.0443e-07	1	1
3	treat.medi.575: 0	4.0443e-07	1	1
3	treat.melphalan: 0	4.0443e-07	1	1
3	treat.mercaptopurine: 0	4.0443e-07	1	1
3	treat.mgi.114: 0	4.0443e-07	1	1
3	treat.morab.004: 0	4.0443e-07	1	1
3	treat.motexafin.gadolinium: 0	4.0443e-07	1	1
3	treat.nilutamide: 0	4.0443e-07	1	1
3	treat.o6.bg: 0	4.0443e-07	1	1
3	treat.ondansetron: 0	4.0443e-07	1	1
3	treat.oxcarbazepine: 0	4.0443e-07	1	1
3	treat.panitumumab: 0	4.0443e-07	1	1
3	treat.pep.3.klh.conjugate.vaccine: 0	4.0443e-07	1	1
3	treat.phenytoin.sodium: 0	4.0443e-07	1	1
3	treat.placebo: 0	4.0443e-07	1	1
3	treat.plexxikon.plx3397: 0	4.0443e-07	1	1
3	treat.pyrazinamide: 0	4.0443e-07	1	1
3	treat.rapamycin: 0	4.0443e-07	1	1
3	treat.resiquimod: 0	4.0443e-07	1	1
3	treat.rose.bengal: 0	4.0443e-07	1	1
3	treat.sargramostim: 0	4.0443e-07	1	1
3	treat.streptozocin: 0	4.0443e-07	1	1
3	treat.suramin: 0	4.0443e-07	1	1
3	treat.talimogene.laherparepvec: 0	4.0443e-07	1	1
3	treat.thioguanine: 0	4.0443e-07	1	1
3	treat.tipifarnib: 0	4.0443e-07	1	1
3	treat.trametinib: 0	4.0443e-07	1	1
3	treat.treosulfan: 0	4.0443e-07	1	1
3	treat.valproic.acid: 0	4.0443e-07	1	1
3	treat.vatalanib: 0	4.0443e-07	1	1
3	treat.vemurafenib: 0	4.0443e-07	1	1
3	treat.vismodegib: 0	4.0443e-07	1	1
3	treat.X2.methoxyestradiol: 0	4.0443e-07	1	1
3	treat.X81c6: 0	4.0443e-07	1	1
3	treat.carboplatin: 0	4.5288e-07	1	1
3	treat.bevacizumab: 0	4.7854e-07	1	1
3	treat.target.nucleotide.depletion: 0	7.1451e-07	1	1
3	treat.clodronic.acid: 0	7.9438e-07	1	1
3	treat.denosumab: 0	8.2669e-07	1	1
3	treat.toremifene: 0	8.9512e-07	1	1
3	treat.palonosetron: 0	9.3135e-07	1	1
3	treat.fluorouracil: 0	9.8387e-07	1	1
3	prior dx: No	1.0471e-06	1	1
3	X PANCAN CNA PANCAN K8: Squamous	1.1709e-06	1	1
3	treat.pegfilgrastim: 0	1.47e-06	1	1
3	treat.trastuzumab: 0	1.5376e-06	1	1
3	treat.vinorelbine: 0	1.6519e-06	1	1
3	histological type: Medullary Carcinoma	1.6938e-06	1	1
3	icd o 3 histology: 8510/3	1.6938e-06	1	1
3	BRCA.AJCC Stage nature2012: Stage IIB	1.7879e-06	1	1
3	BRCA.AJCC Stage nature2012: Stage II	2.2687e-06	1	1
3	BRCA.menopause status: Indeterminate (neither Pre or Postmenopausal)	3.4158e-06	1	1
3	treat.zoledronic.acid: 0	5.3265e-06	1	1
3	anatomic neoplasm subdivision: Left	5.9151e-06	1	1
3	BRCA.Node nature2012: N1	1.0073e-05	1	1
3	treat.epirubicin: 0	1.0837e-05	1	1
3	X PANCAN miRNA PANCAN: miRNA cluster 11	1.2167e-05	1	1
3	anatomic neoplasm subdivision: Right Upper Outer Quadrant	1.2253e-05	1	1
3	treat.capecitabine: 0	1.2501e-05	1	1
3	initial pathologic diagnosis method: Excisional Biopsy	1.621e-05	1	1
3	radiation therapy: YES	2.128e-05	1	1
3	initial pathologic diagnosis method: Fine needle aspiration biopsy	2.3917e-05	1	1
3	BRCA.positive finding estrogen receptor other measurement scale text: 0	3.1437e-05	1	1
3	X PANCAN mutation PANCAN: mutation cluster 2	3.2244e-05	1	1
3	X PANCAN miRNA PANCAN: miRNA cluster 4	5.6358e-05	1	1
3	treat.radiotherapy: 1	6.5643e-05	1	1
3	X PANCAN RPPA PANCAN K8: KIRC-like c1	7.3124e-05	1	1
3	BRCA.her2 erbb pos finding fluorescence n st hybrdztn clcltn mthd txt: PathVysion HER-2 D Probe Kit	8.3505e-05	1	1
3	COAD.X: NA	0.00010842	1	1
3	BRCA.SigClust Unsupervised mRNA nature2012: -11	0.00012277	1	1
3	BRCA.Converted Stage nature2012: Stage IIB	0.00014354	1	1
3	BRCA.metastatic breast carcinoma estrogen receptor status: Negative	0.0001747	1	1
3	lost follow up:	0.00029609	1	1
3	anatomic neoplasm subdivision: Left Lower Inner Quadrant	0.00030716	1	1
3	BRCA.menopause status: Peri (6-12 months since last menstrual period)	0.00036514	1	1
3	BRCA.pos finding progesterone receptor other measurement scale text: 0	0.00040688	1	1
3	BRCA.CN Clusters nature2012: 3	0.00050755	1	1
3	BRCA.OS event nature2012: 1	0.00059059	1	1
3	BRCA.Vital Status nature2012: DECEASED	0.00059059	1	1
3	BRCA.breast carcinoma surgical procedure name:	0.00073498	1	1
3	BRCA.immunohistochemistry positive cell score: 1+	0.00081808	1	1
3	X PANCAN mutation PANCAN: mutation cluster 13	0.0011392	1	1
3	BRCA.breast carcinoma progesterone receptor status:	0.0017317	1	1
3	BRCA.metastatic breast carcinoma progesterone receptor status: Negative	0.0019272	1	1
3	anatomic neoplasm subdivision: Right Upper Inner Quadrant	0.0019402	1	1
3	BRCA.axillary lymph node stage method type: No axillary staging	0.0019778	1	1
3	BRCA.RPPA Clusters nature2012: ReacII	0.0022311	1	1
3	followup case report form submission reason: Scheduled Follow-up Submission	0.0022547	1	1
3	BRCA.er detection method text: Allred 0 = 0+0	0.0024851	1	1
3	BRCA.er detection method text: H-SCORE 0	0.0024851	1	1
3	BRCA.pgr detection method text: Allred 0 = 0+0	0.0024851	1	1
3	BRCA.pos finding her2 erbb2 other measurement scale text: ACIS	0.0024851	1	1
3	X PANCAN miRNA PANCAN: miRNA cluster 1	0.0024851	1	1
3	new tumor event after initial treatment:	0.0033348	1	1
3	BRCA.miRNA Clusters nature2012: 4	0.0054668	1	1
3	BRCA.X PANCAN mirna BRCA: cluster 4	0.0054668	1	1
3	BRCA.breast carcinoma estrogen receptor status:	0.0054734	1	1
3	BRCA.pgr detection method text: H-SCORE 0	0.0072096	1	1
3	X PANCAN RPPA PANCAN K8: OV-like c4	0.0072096	1	1
3	histological type: Other specify	0.0074107	1	1
4	X PANCAN UNC RNAseq PANCAN K16: squamous-like c4	0	1	1
4	X PANCAN Cluster Cluster PANCAN: C2-Squamous-like	9.6589e-15	1	1
4	BLCA.non mibc tx:	2.7756e-14	1	1
4	BLCA.diagnosis subtype: Non-Papillary	4.2855e-14	1	1
4	neoplasm histologic grade: High Grade	2.7778e-13	1	1
4	BLCA.mibc 90day post resection bcg:	2.8333e-13	1	1
4	BLCA.induction course complete:	3.1675e-13	1	1
4	BLCA.maint therapy course complete:	3.1675e-13	1	1
4	BLCA.complete response observed:	3.5383e-13	1	1
4	histological type: Muscle invasive urothelial carcinoma (pT2 or above)	3.5315e-12	1	1
4	icd o 3 histology: 8120/3	3.6834e-12	1	1
4	tumor tissue site: Bladder	3.9421e-12	1	1
4	X anatomical origin: Bladder	4.0519e-12	1	1
4	X cohort: TCGA Bladder Cancer	4.0519e-12	1	1
4	X primary disease: bladder urothelial carcinoma	4.0519e-12	1	1
4	cancer type: BLCA	4.0519e-12	1	1
4	initial pathologic diagnosis method: Transurethral resection (TURBT)	6.2278e-12	1	1
4	primary therapy outcome success: Progressive Disease	1.3367e-11	1	1
4	BLCA.chemical exposure text:	3.8214e-11	1	1
4	BLCA.person concomitant prostate carcinoma pathologic t stage:	1.1813e-10	1	1
4	BLCA.X PANCAN DNAMethyl BLCA: cluster 1	2.6046e-10	1	1
4	BLCA.person primary industry text:	9.3248e-10	1	1
4	BLCA.bladder carcinoma extracapsular extension status:	1.5166e-09	1	1
4	other metastatic involvement anatomic site:	6.255e-09	1	1
4	BLCA.person concomitant prostate carcinoma occurrence indicator: NO	6.9272e-09	1	1
4	icd o 3 site: C67.9	7.2287e-09	1	1
4	histological type: Astrocytoma	1.0409e-08	1	1
4	residual disease post new tumor event margin status: NA	1.2543e-08	1	1
4	malignant neoplasm metastatic involvement site: None	1.9782e-08	1	1
4	BLCA.hist of non mibc:	2.6168e-08	1	1
4	icd o 3 histology: 9400/3	3.7449e-08	1	1
4	BLCA.cancer diagnosis cancer type icd9 text name:	1.7189e-07	1	1
4	BLCA.family medical history relative family member relationship type:	1.7189e-07	1	1
4	BLCA.clinical T:	3.2358e-07	1	1
4	X PANCAN DNAMethyl PANCAN: Cluster 14 (HNSC)	3.6723e-07	1	1
4	BRCA.AJCC Stage nature2012: NA	4.3995e-07	1	1
4	BRCA.axillary lymph node stage method type: NA	4.3995e-07	1	1
4	BRCA.axillary lymph node stage other method descriptive text: NA	4.3995e-07	1	1
4	BRCA.breast cancer surgery margin status: NA	4.3995e-07	1	1
4	BRCA.breast carcinoma estrogen receptor status: NA	4.3995e-07	1	1
4	BRCA.breast carcinoma immunohistochemistry er pos finding scale: NA	4.3995e-07	1	1
4	BRCA.breast carcinoma immunohistochemistry pos cell score: NA	4.3995e-07	1	1
4	BRCA.breast carcinoma immunohistochemistry prgstrn rcptr ps fndng scl: NA	4.3995e-07	1	1
4	BRCA.breast carcinoma primary surgical procedure name: NA	4.3995e-07	1	1
4	BRCA.breast carcinoma progesterone receptor status: NA	4.3995e-07	1	1
4	BRCA.breast carcinoma surgical procedure name: NA	4.3995e-07	1	1
4	BRCA.breast neoplasm other surgical procedure descriptive text: NA	4.3995e-07	1	1
4	BRCA.Converted Stage nature2012: NA	4.3995e-07	1	1
4	BRCA.cytokeratin immunohistochemistry staining method mcrmtstss ndctr: NA	4.3995e-07	1	1
4	BRCA.distant metastasis present ind2: NA	4.3995e-07	1	1
4	BRCA.er detection method text: NA	4.3995e-07	1	1
4	BRCA.er level cell percentage category: NA	4.3995e-07	1	1
4	BRCA.ER Status nature2012: NA	4.3995e-07	1	1
4	BRCA.first nonlymph node metastasis anatomic site: NA	4.3995e-07	1	1
4	BRCA.first recurrent non nodal metastatic anatomic site descriptv txt: NA	4.3995e-07	1	1
4	BRCA.Gender nature2012: NA	4.3995e-07	1	1
4	BRCA.her2 and centromere 17 positive finding other measuremnt scl txt: NA	4.3995e-07	1	1
4	BRCA.her2 erbb method calculation method text: NA	4.3995e-07	1	1
4	BRCA.her2 erbb pos finding cell percent category: NA	4.3995e-07	1	1
4	BRCA.her2 erbb pos finding fluorescence n st hybrdztn clcltn mthd txt: NA	4.3995e-07	1	1
4	BRCA.HER2 Final Status nature2012: NA	4.3995e-07	1	1
4	BRCA.her2 immunohistochemistry level result: NA	4.3995e-07	1	1
4	BRCA.immunohistochemistry positive cell score: NA	4.3995e-07	1	1
4	BRCA.lab procedure her2 neu in situ hybrid outcome type: NA	4.3995e-07	1	1
4	BRCA.lab proc her2 neu immunohistochemistry receptor status: NA	4.3995e-07	1	1
4	BRCA.margin status: NA	4.3995e-07	1	1
4	BRCA.menopause status: NA	4.3995e-07	1	1
4	BRCA.Metastasis Coded nature2012: NA	4.3995e-07	1	1
4	BRCA.Metastasis nature2012: NA	4.3995e-07	1	1
4	BRCA.metastatic breast carcinm ps fndng prgstrn rcptr thr msr scl txt: NA	4.3995e-07	1	1
4	BRCA.metastatic breast carcinoma erbb2 immunohistochemistry levl rslt: NA	4.3995e-07	1	1
4	BRCA.metastatic breast carcinoma estrogen receptor detection mthd txt: NA	4.3995e-07	1	1
4	BRCA.metastatic breast carcinoma estrogen receptor status: NA	4.3995e-07	1	1
4	BRCA.metastatic breast carcinoma estrogen receptr lvl cll prcnt ctgry: NA	4.3995e-07	1	1
4	BRCA.metastatic breast carcinoma her2 erbb method calculatin mthd txt: NA	4.3995e-07	1	1
4	BRCA.metastatic breast carcinoma her2 erbb pos findng cll prcnt ctgry: NA	4.3995e-07	1	1
4	BRCA.metastatic breast carcinoma immunhstchmstry r pstv fndng scl typ: NA	4.3995e-07	1	1
4	BRCA.metastatic breast carcinoma immunohistochemistry er pos cell scr: NA	4.3995e-07	1	1
4	BRCA.metastatic breast carcinoma immunohistochemistry pr pos cell scr: NA	4.3995e-07	1	1
4	BRCA.metastatic breast carcinoma lab proc hr2 n n st hybrdztn tcm typ: NA	4.3995e-07	1	1
4	BRCA.metastatic breast carcinoma pos finding hr2 rbb2 thr msr scl txt: NA	4.3995e-07	1	1
4	BRCA.metastatic breast carcinoma progestern rcptr lvl cll prcnt ctgry: NA	4.3995e-07	1	1
4	BRCA.metastatic breast carcinoma progesterone receptor dtctn mthd txt: NA	4.3995e-07	1	1
4	BRCA.metastatic breast carcinoma progesterone receptor status: NA	4.3995e-07	1	1
4	BRCA.metastatic breast carcinom lb prc hr2 n mmnhstchmstry rcptr stts: NA	4.3995e-07	1	1
4	BRCA.mtsttc brst crcnm hr2 rbb ps fndng flrscnc n st hybrdztn clcltn: NA	4.3995e-07	1	1
4	BRCA.mtsttc brst crcnm mmnhstchmstry prgstrn rcptr pstv fndng scl typ: NA	4.3995e-07	1	1
4	BRCA.Node Coded nature2012: NA	4.3995e-07	1	1
4	BRCA.Node nature2012: NA	4.3995e-07	1	1
4	BRCA.PAM50Call RNAseq: NA	4.3995e-07	1	1
4	BRCA.PAM50 mRNA nature2012: NA	4.3995e-07	1	1
4	BRCA.pgr detection method text: NA	4.3995e-07	1	1
4	BRCA.pos finding her2 erbb2 other measurement scale text: NA	4.3995e-07	1	1
4	BRCA.pos finding metastatic brst crcnm strgn rcptr thr msrmnt scl txt: NA	4.3995e-07	1	1
4	BRCA.pos finding progesterone receptor other measurement scale text: NA	4.3995e-07	1	1
4	BRCA.positive finding estrogen receptor other measurement scale text: NA	4.3995e-07	1	1
4	BRCA.progesterone receptor level cell percent category: NA	4.3995e-07	1	1
4	BRCA.PR Status nature2012: NA	4.3995e-07	1	1
4	BRCA.RPPA Clusters nature2012: NA	4.3995e-07	1	1
4	BRCA.Survival Data Form nature2012: NA	4.3995e-07	1	1
4	BRCA.Tumor nature2012: NA	4.3995e-07	1	1
4	BRCA.Tumor T1 Coded nature2012: NA	4.3995e-07	1	1
4	BRCA.Vital Status nature2012: NA	4.3995e-07	1	1
4	BRCA.X PANCAN DNAMethyl BRCA: NA	4.3995e-07	1	1
4	BRCA.X PANCAN mirna BRCA: NA	4.3995e-07	1	1
4	BRCA.surgical procedure purpose other text: NA	4.5845e-07	1	1
4	BLCA.X PANCAN mirna BLCA: cluster 4	4.8432e-07	1	1
4	BLCA.disease extracapsular extension ind 3:	5.0814e-07	1	1
4	BLCA.occupation primary job:	9.744e-07	1	1
4	neoplasm histologic grade: G3	1.1557e-06	1	1
4	BLCA.hist of non mibc: NO	1.1942e-06	1	1
4	BLCA.additional treatment completion success outcome: Progressive Disease	1.262e-06	1	1
4	pathologic stage: Stage III	1.6136e-06	1	1
4	tissue source site: FD	2.3466e-06	1	1
4	tissue source site: DU	2.8096e-06	1	1
4	BLCA.lymphovascular invasion present: NO	2.8417e-06	1	1
4	BLCA.X PANCAN DNAMethyl BLCA: cluster 2	3.4158e-06	1	1
4	BLCA.additional treatment completion success outcome: Complete Response	6.7657e-06	1	1
4	LGG.family history of primary brain tumor:	7.0194e-06	1	1
4	LGG.history ionizing rt to head: NO	8.3215e-06	1	1
4	pathologic T: T2b	8.8853e-06	1	1
4	LGG.family history of cancer:	1.0032e-05	1	1
4	histological type other: NA	1.4564e-05	1	1
4	LGG.first presenting symptom longest duration: 0 - 30 Days	1.6796e-05	1	1
4	X PANCAN RPPA PANCAN K8: squamous c3	1.9144e-05	1	1
4	tumor tissue site: Central nervous system	1.9621e-05	1	1
4	BRCA.SigClust Intrinsic mRNA nature2012: NA	2.5359e-05	1	1
4	BRCA.SigClust Unsupervised mRNA nature2012: NA	2.5359e-05	1	1
4	LGG.inherited genetic syndrome found:	2.5666e-05	1	1
4	LGG.ldh1 mutation tested: NO	3.0348e-05	1	1
4	COAD.AWG cancer type Oct62011: NA	3.2001e-05	1	1
4	COAD.braf gene analysis performed: NA	3.2001e-05	1	1
4	COAD.braf gene analysis result: NA	3.2001e-05	1	1
4	COAD.CDE ID 3226963: NA	3.2001e-05	1	1
4	COAD.CIMP: NA	3.2001e-05	1	1
4	COAD.colon polyps present: NA	3.2001e-05	1	1
4	COAD.history of colon polyps: NA	3.2001e-05	1	1
4	COAD.kras gene analysis performed: NA	3.2001e-05	1	1
4	COAD.kras mutation found: NA	3.2001e-05	1	1
4	COAD.loss expression of mismatch repair proteins by ihc: NA	3.2001e-05	1	1
4	COAD.loss expression of mismatch repair proteins by ihc result: NA	3.2001e-05	1	1
4	COAD.lymphatic invasion: NA	3.2001e-05	1	1
4	COAD.microsatellite instability: NA	3.2001e-05	1	1
4	COAD.MSI updated Oct62011: NA	3.2001e-05	1	1
4	COAD.non nodal tumor deposits: NA	3.2001e-05	1	1
4	COAD.perineural invasion present: NA	3.2001e-05	1	1
4	COAD.site of additional surgery new tumor event mets: NA	3.2001e-05	1	1
4	COAD.synchronous colon cancer present: NA	3.2001e-05	1	1
4	COAD.venous invasion: NA	3.2001e-05	1	1
4	COAD.X PANCAN mirna COAD: NA	3.2001e-05	1	1
4	residual tumor: NA	3.9145e-05	1	1
4	person neoplasm cancer status: WITH TUMOR	4.4901e-05	1	1
4	BLCA.lymphovascular invasion present:	5.843e-05	1	1
4	BLCA.person occupation description text:	6.392e-05	1	1
4	LGG.animal insect allergy types:	6.6439e-05	1	1
4	BLCA.family medical history relative family member relationship type: Mother	7.4729e-05	1	1
4	BLCA.X PANCAN mirna BLCA: cluster 3	7.503e-05	1	1
4	X PANCAN DNAMethyl PANCAN: Cluster 6	7.6627e-05	1	1
4	LGG.first diagnosis age of animal insect allergy:	7.7014e-05	1	1
4	LGG.tumor location: Supratentorial	Temporal Lobe	9.5786e-05	1	1
4	X PANCAN miRNA PANCAN: miRNA cluster 11	9.649e-05	1	1
4	LGG.first diagnosis age of food allergy:	9.8118e-05	1	1
4	LGG.inherited genetic syndrome result:	0.00010293	1	1
4	LGG.ldh1 mutation found:	0.000104	1	1
4	LGG.ldh1 mutation test method:	0.00010974	1	1
4	followup treatment success: Progressive Disease	0.00011293	1	1
4	LGG.first diagnosis age asth ecz hay fev mold dust:	0.00011353	1	1
4	new neoplasm event type: NA	0.00012439	1	1
4	new tumor event additional surgery procedure: NA	0.00012439	1	1
4	pathologic M: NA	0.00012439	1	1
4	pathologic N: NA	0.00012439	1	1
4	pathologic stage: NA	0.00012439	1	1
4	pathologic T: NA	0.00012439	1	1
4	postoperative rx tx: NA	0.00012439	1	1
4	X anatomical origin: Brain	0.00012439	1	1
4	X cohort: TCGA Lower Grade Glioma	0.00012439	1	1
4	X primary disease: brain lower grade glioma	0.00012439	1	1
4	cancer type: LGG	0.00012439	1	1
4	LGG.food allergy types:	0.00012504	1	1
4	BLCA.tobacco smoking history: Current reformed smoker for < or = 15 years	0.00014052	1	1
4	icd 10: C71.0	0.00016202	1	1
4	system version: NA	0.00018004	1	1
4	LGG.laterality: Midline	0.00018726	1	1
4	BRCA.Integrated Clusters no exp nature2012: NA	0.00022571	1	1
4	BRCA.Integrated Clusters unsup exp nature2012: NA	0.00022571	1	1
4	BRCA.Integrated Clusters with PAM50 nature2012: NA	0.00022571	1	1
4	prior dx: No	0.00023081	1	1
4	LGG.mental status changes: NO	0.00023657	1	1
4	anatomic neoplasm subdivision: Bladder - NOS	0.00029142	1	1
4	LIHC.ablation embolization tx adjuvant: NA	0.0003152	1	1
4	LIHC.adjacent hepatic tissue inflammation extent type: NA	0.0003152	1	1
4	LIHC.child pugh classification grade: NA	0.0003152	1	1
4	LIHC.history hepato carcinoma risk factor: NA	0.0003152	1	1
4	LIHC.history hepato carcinoma risk factor other: NA	0.0003152	1	1
4	LIHC.liver fibrosis ishak score category: NA	0.0003152	1	1
4	LIHC.new tumor event ablation embo tx: NA	0.0003152	1	1
4	LIHC.new tumor event liver transplant: NA	0.0003152	1	1
4	LIHC.relative family cancer history ind 3: NA	0.0003152	1	1
4	LIHC.specimen collection method name: NA	0.0003561	1	1
4	LIHC.surgical procedure name other specify text: NA	0.0003561	1	1
4	LIHC.vascular tumor cell invasion type: NA	0.0003561	1	1
4	LGG.performance status scale timing:	0.00038144	1	1
4	X EVENT: 1	0.00040465	1	1
4	X OS IND: 1	0.00040465	1	1
4	treat.temozolomide: 1	0.00042065	1	1
4	treat.target.sex.hormone.signalling.inhibition: 0	0.00042848	1	1
4	LGG.motor movement changes: YES	0.00043907	1	1
4	vital status: DECEASED	0.00044061	1	1
4	anatomic neoplasm subdivision: Wall Lateral	0.00044313	1	1
4	LGG.supratentorial localization: Not listed in Medical Record	0.00050888	1	1
4	BLCA.tobacco smoking history: Current smoker	0.00056299	1	1
4	LGG.headache history: NO	0.0005667	1	1
4	pathologic T: T3b	0.00057404	1	1
4	LIHC.viral hepatitis serology: NA	0.0006005	1	1
4	icd 10: C67.2	0.00063478	1	1
4	LGG.sensory changes: YES	0.00063478	1	1
4	LGG.eczema history:	0.00071071	1	1
4	BLCA.disease extracapsular extension ind 3: YES	0.00094498	1	1
4	LGG.seizure history: NO	0.00095446	1	1
4	LGG.asthma history:	0.0010593	1	1
4	X PANCAN UNC RNAseq PANCAN K16: RNA cluster 2	0.001139	1	1
4	COAD.X: NA	0.0011552	1	1
4	X PANCAN miRNA PANCAN: miRNA cluster 7	0.0011705	1	1
4	LGG.visual changes: NO	0.0012383	1	1
4	icd o 3 site: C71.9	0.0013281	1	1
4	LGG.food allergy history:	0.001354	1	1
4	LGG.hay fever history:	0.00144	1	1
4	tissue source site: EL	0.0017999	1	1
4	new neoplasm event occurrence anatomic site: Other	specify	0.0022664	1	1
4	LGG.laterality: Right	0.0023437	1	1
4	treat.cilengitide: 1	0.0024851	1	1
4	X PANCAN mutation PANCAN: mutation cluster 7	0.0024851	1	1
4	tissue source site: XF	0.002716	1	1
4	BLCA.tobacco smoking history: Current reformed smoker for > 15 years	0.0028254	1	1
4	LGG.mold or dust allergy history:	0.0028922	1	1
4	new neoplasm event type: Locoregional (Urothelial tumor event)	0.0031093	1	1
4	anatomic neoplasm subdivision: Wall Posterior	0.0031564	1	1
4	treat.cisplatin: 1	0.0035511	1	1
4	LGG.sensory changes: NO	0.0035762	1	1
4	BLCA.X PANCAN mirna BLCA: cluster 2	0.0036495	1	1
4	BLCA.clinical T: T4a	0.0037	1	1
4	tissue source site: BT	0.0038638	1	1
4	LGG.first presenting symptom: Seizures	0.0039938	1	1
4	BLCA.disease extracapsular extension ind 3: NO	0.004025	1	1
4	LGG.animal insect allergy history:	0.0041811	1	1
4	LGG.seizure history: YES	0.004242	1	1
4	icd o 3 site: C67.2	0.0043591	1	1
4	LGG.preoperative antiseizure meds: NO	0.0050531	1	1
4	BLCA.additional treatment completion success outcome:	0.0051058	1	1
4	BLCA.cancer diagnosis cancer type icd9 text name: Colon	0.005704	1	1
4	LGG.visual changes: YES	0.0059778	1	1
4	X RFS IND: 1	0.0069486	1	1
4	LGG.first presenting symptom: Headaches	0.0070029	1	1
4	new tumor event after initial treatment: YES	0.0070494	1	1
4	treat.isotretinoin: 1	0.0072096	1	1
4	X PANCAN DNAMethyl PANCAN: OV-like c1	0.0072096	1	1
5	histological type: Infiltrating Lobular Carcinoma	0	1	1
5	icd o 3 histology: 8520/3	0	1	1
5	X PANCAN miRNA PANCAN: miRNA cluster 5	1.1102e-16	1	1
5	X PANCAN mutation PANCAN:	2.8866e-15	1	1
5	X PANCAN Cluster Cluster PANCAN:	2.5707e-11	1	1
5	X PANCAN UNC RNAseq PANCAN K16:	3.5048e-11	1	1
5	THCA.braf gene genotyping outcome lab results text: NA	2.8358e-10	1	1
5	THCA.extrathyroid carcinoma present extension status: NA	2.8358e-10	1	1
5	THCA.first degree relative history thyrd glnd crcnm dgnss rltnshp typ: NA	2.8358e-10	1	1
5	THCA.genotype analysis performed indicator: NA	2.8358e-10	1	1
5	THCA.genotyping results gene mutation not reported reason: NA	2.8358e-10	1	1
5	THCA.histologic disease progression present indicator: NA	2.8358e-10	1	1
5	THCA.histologic disease progression present type: NA	2.8358e-10	1	1
5	THCA.i 131 first administered dose: NA	2.8358e-10	1	1
5	THCA.i 131 subsequent administered dose: NA	2.8358e-10	1	1
5	THCA.i 131 total administered dose: NA	2.8358e-10	1	1
5	THCA.i 131 total administered preparation technique: NA	2.8358e-10	1	1
5	THCA.lymph node preoperative assessment diagnostic imaging type: NA	2.8358e-10	1	1
5	THCA.lymph node preoperative scan indicator: NA	2.8358e-10	1	1
5	THCA.metastatic neoplasm confirmed diagnosis method name: NA	2.8358e-10	1	1
5	THCA.metastatic neoplasm confirmed diagnosis method text: NA	2.8358e-10	1	1
5	THCA.new neoplasm confirmed diagnosis method name: NA	2.8358e-10	1	1
5	THCA.other genotyping outcome lab results text: NA	2.8358e-10	1	1
5	THCA.patient personal medical history thyroid gland disorder name: NA	2.8358e-10	1	1
5	THCA.patient personal medical history thyroid other specify text: NA	2.8358e-10	1	1
5	THCA.person lifetime risk radiation exposure indicator: NA	2.8358e-10	1	1
5	THCA.post surgical procedure assessment thyroid gland carcinoma stats: NA	2.8358e-10	1	1
5	THCA.primary neoplasm focus type: NA	2.8358e-10	1	1
5	THCA.primary thyroid gland neoplasm location anatomic site: NA	2.8358e-10	1	1
5	THCA.radiation therapy administered dose text: NA	2.8358e-10	1	1
5	THCA.radiation therapy administered preparation technique text: NA	2.8358e-10	1	1
5	THCA.radiosensitizing agent administered indicator: NA	2.8358e-10	1	1
5	THCA.ras family gene genotyping outcome lab results text: NA	2.8358e-10	1	1
5	THCA.ret ptc rearrangement genotyping outcome lab results text: NA	2.8358e-10	1	1
5	THCA.therapeutic procedure new neoplasm required additional thrpy typ: NA	2.8358e-10	1	1
5	THCA.thyroid gland carcinoma involvement regional lymph node type: NA	2.8358e-10	1	1
5	primary lymph node presentation assessment: YES	8.5708e-09	1	1
5	BRCA.Gender nature2012:	9.1035e-09	1	1
5	BRCA.Survival Data Form nature2012:	9.1035e-09	1	1
5	BRCA.Vital Status nature2012:	9.1035e-09	1	1
5	LGG.animal insect allergy history: NA	1.3888e-08	1	1
5	LGG.animal insect allergy types: NA	1.3888e-08	1	1
5	LGG.asthma history: NA	1.3888e-08	1	1
5	LGG.eczema history: NA	1.3888e-08	1	1
5	LGG.family history of cancer: NA	1.3888e-08	1	1
5	LGG.family history of primary brain tumor: NA	1.3888e-08	1	1
5	LGG.first diagnosis age asth ecz hay fev mold dust: NA	1.3888e-08	1	1
5	LGG.first diagnosis age of animal insect allergy: NA	1.3888e-08	1	1
5	LGG.first diagnosis age of food allergy: NA	1.3888e-08	1	1
5	LGG.first presenting symptom: NA	1.3888e-08	1	1
5	LGG.first presenting symptom longest duration: NA	1.3888e-08	1	1
5	LGG.food allergy history: NA	1.3888e-08	1	1
5	LGG.food allergy types: NA	1.3888e-08	1	1
5	LGG.hay fever history: NA	1.3888e-08	1	1
5	LGG.headache history: NA	1.3888e-08	1	1
5	LGG.history ionizing rt to head: NA	1.3888e-08	1	1
5	LGG.inherited genetic syndrome found: NA	1.3888e-08	1	1
5	LGG.inherited genetic syndrome result: NA	1.3888e-08	1	1
5	LGG.laterality: NA	1.3888e-08	1	1
5	LGG.ldh1 mutation found: NA	1.3888e-08	1	1
5	LGG.ldh1 mutation tested: NA	1.3888e-08	1	1
5	LGG.ldh1 mutation test method: NA	1.3888e-08	1	1
5	LGG.mental status changes: NA	1.3888e-08	1	1
5	LGG.mold or dust allergy history: NA	1.3888e-08	1	1
5	LGG.motor movement changes: NA	1.3888e-08	1	1
5	LGG.performance status scale timing: NA	1.3888e-08	1	1
5	LGG.preoperative antiseizure meds: NA	1.3888e-08	1	1
5	LGG.preoperative corticosteroids: NA	1.3888e-08	1	1
5	LGG.seizure history: NA	2.2237e-08	1	1
5	LGG.sensory changes: NA	2.2237e-08	1	1
5	LGG.supratentorial localization: NA	2.2237e-08	1	1
5	LGG.tumor location: NA	2.2237e-08	1	1
5	pathologic stage: Stage IIIC	9.217e-08	1	1
5	BRCA.Converted Stage nature2012:	1.1737e-07	1	1
5	BRCA.Node Coded nature2012:	1.1737e-07	1	1
5	BRCA.Node nature2012:	1.1737e-07	1	1
5	BRCA.Tumor nature2012:	1.1737e-07	1	1
5	BRCA.Tumor T1 Coded nature2012:	1.5251e-07	1	1
5	postoperative rx tx: YES	1.7119e-07	1	1
5	BRCA.Metastasis Coded nature2012:	1.9736e-07	1	1
5	BRCA.Metastasis nature2012:	1.9736e-07	1	1
5	LGG.visual changes: NA	2.0205e-07	1	1
5	BRCA.ER Status nature2012:	2.5437e-07	1	1
5	BRCA.PR Status nature2012:	2.7658e-07	1	1
5	BRCA.AJCC Stage nature2012:	3.2656e-07	1	1
5	BRCA.HER2 Final Status nature2012:	4.1761e-07	1	1
5	BRCA.X PANCAN DNAMethyl BRCA:	5.8065e-07	1	1
5	initial pathologic diagnosis method: Core needle biopsy	7.8473e-07	1	1
5	BRCA.miRNA Clusters nature2012: 6	1.7114e-06	1	1
5	BRCA.X PANCAN mirna BRCA: cluster 6	1.7114e-06	1	1
5	tissue source site: F4	5.3562e-06	1	1
5	COAD.kras mutation found:	5.451e-06	1	1
5	BRCA.breast carcinoma surgical procedure name: Simple Mastectomy	7.4573e-06	1	1
5	BRCA.PAM50 mRNA nature2012:	7.8048e-06	1	1
5	additional surgery locoregional procedure: NA	8.8729e-06	1	1
5	BRCA.methylation Clusters nature2012: 1	9.5646e-06	1	1
5	BRCA.X PANCAN DNAMethyl BRCA: cluster 1	9.5646e-06	1	1
5	X PANCAN CNA PANCAN K8: Quiet	1.0074e-05	1	1
5	COAD.microsatellite instability:	1.4093e-05	1	1
5	targeted molecular therapy: NA	1.7337e-05	1	1
5	COAD.braf gene analysis result:	1.8051e-05	1	1
5	COAD.X PANCAN mirna COAD:	1.947e-05	1	1
5	COAD.AWG cancer type Oct62011:	3.2755e-05	1	1
5	COAD.CIMP:	3.2755e-05	1	1
5	COAD.MSI updated Oct62011:	3.2755e-05	1	1
5	new neoplasm event type:	3.3209e-05	1	1
5	residual disease post new tumor event margin status:	3.4733e-05	1	1
5	BRCA.breast carcinoma progesterone receptor status: Positive	3.5969e-05	1	1
5	tissue prospective collection indicator: YES	4.605e-05	1	1
5	prior dx: NA	4.9487e-05	1	1
5	X anatomical origin: Colon	4.9487e-05	1	1
5	X cohort: TCGA Colon Cancer	4.9487e-05	1	1
5	X primary disease: colon adenocarcinoma	4.9487e-05	1	1
5	cancer type: COAD	4.9487e-05	1	1
5	COAD.lymphatic invasion: YES	6.333e-05	1	1
5	COAD.synchronous colon cancer present: NO	6.7106e-05	1	1
5	tumor tissue site: Colon	7.013e-05	1	1
5	treat.docetaxel: 1	7.0618e-05	1	1
5	X PANCAN miRNA PANCAN: miRNA cluster 13	7.6627e-05	1	1
5	COAD.kras gene analysis performed: NO	8.3011e-05	1	1
5	BRCA.breast carcinoma estrogen receptor status: Positive	8.3678e-05	1	1
5	tissue retrospective collection indicator: NO	8.6829e-05	1	1
5	treat.target.nucleotide.depletion: 1	9.5442e-05	1	1
5	COAD.braf gene analysis performed: NO	0.00012292	1	1
5	COAD.site of additional surgery new tumor event mets:	0.00014686	1	1
5	COAD.colon polyps present: YES	0.00015771	1	1
5	icd o 3 histology:	0.00018741	1	1
5	icd o 3 site:	0.00018741	1	1
5	COAD.non nodal tumor deposits: YES	0.00019526	1	1
5	X PANCAN CNA PANCAN K8: COAD-READ	0.00024276	1	1
5	icd 10:	0.00025792	1	1
5	system version: 7th	0.00025823	1	1
5	histological type: Colon Mucinous Adenocarcinoma	0.00029871	1	1
5	tissue source site: A6	0.00029871	1	1
5	X PANCAN RPPA PANCAN K8: KIRC-like c1	0.00030718	1	1
5	treat.radiotherapy: 0	0.0003323	1	1
5	pathologic N: N3a	0.00034767	1	1
5	COAD.venous invasion: YES	0.00035654	1	1
5	treat.cyclophosphamide: 1	0.00046868	1	1
5	COAD.loss expression of mismatch repair proteins by ihc result:	0.00046996	1	1
5	treat.oxaliplatin: 1	0.00050097	1	1
5	pathologic M: MX	0.00051657	1	1
5	COAD.CDE ID 3226963: MSS	0.0005681	1	1
5	LIHC.child pugh classification grade:	0.00061054	1	1
5	BRCA.PAM50Call RNAseq: Normal	0.00070579	1	1
5	anatomic neoplasm subdivision: Right	0.00091036	1	1
5	X PANCAN RPPA PANCAN K8: COADREAD-like c7	0.00091036	1	1
5	treat.leucovorin: 1	0.00093183	1	1
5	new tumor event additional surgery procedure:	0.0010072	1	1
5	prior dx: Yes	0.0010362	1	1
5	X PANCAN DNAMethyl PANCAN: COADREAD non-CIMP c11	0.0012139	1	1
5	BLCA.diagnosis subtype: Non-Papillary	0.001354	1	1
5	pathologic N: N2b	0.0015072	1	1
5	LIHC.liver fibrosis ishak score category:	0.0015674	1	1
5	BLCA.person occupation description text: Retired	0.0016213	1	1
5	pathologic N: N2a	0.0017317	1	1
5	BRCA.her2 immunohistochemistry level result:	0.0019569	1	1
5	X PANCAN DNAMethyl PANCAN: COADREAD CIMPL c10	0.0019861	1	1
5	BRCA.er level cell percentage category: 70-79	0.0022311	1	1
5	icd o 3 histology: 8120/3	0.0022824	1	1
5	histological type: Fibrolamellar Carcinoma	0.0024851	1	1
5	COAD.loss expression of mismatch repair proteins by ihc: NO	0.0026306	1	1
5	BRCA.progesterone receptor level cell percent category: 20-29	0.0030183	1	1
5	BLCA.lymphovascular invasion present: YES	0.0030659	1	1
5	BRCA.progesterone receptor level cell percent category: 70-79	0.0031564	1	1
5	X PANCAN DNAMethyl PANCAN: Low purity c2	0.0033136	1	1
5	BRCA.SigClust Intrinsic mRNA nature2012: NA	0.0034072	1	1
5	BRCA.SigClust Unsupervised mRNA nature2012: NA	0.0034072	1	1
5	radiation therapy: NO	0.004123	1	1
5	COAD.perineural invasion present: YES	0.0041991	1	1
5	BLCA.chemical exposure text:	0.0042397	1	1
5	X anatomical origin: Bladder	0.0049771	1	1
5	X cohort: TCGA Bladder Cancer	0.0049771	1	1
5	X primary disease: bladder urothelial carcinoma	0.0049771	1	1
5	cancer type: BLCA	0.0049771	1	1
5	treat.gemcitabine: 1	0.0050531	1	1
5	tissue source site: ED	0.0053273	1	1
5	BRCA.axillary lymph node stage method type: Sentinel lymph node biopsy plus axillary dissection	0.0057033	1	1
5	anatomic neoplasm subdivision: Transverse Colon	0.0057511	1	1
5	BLCA.bladder carcinoma extracapsular extension status:	0.00585	1	1
5	BLCA.X PANCAN DNAMethyl BLCA: cluster 2	0.005956	1	1
5	pathologic T: T3a	0.0059614	1	1
5	oct embedded:	0.0060145	1	1
5	malignant neoplasm metastatic involvement site: None	0.0062213	1	1
5	primary therapy outcome success:	0.006411	1	1
5	neoplasm histologic grade: High Grade	0.0064429	1	1
5	COAD.non nodal tumor deposits: NO	0.0064685	1	1
5	BLCA.mibc 90day post resection bcg:	0.00673	1	1
5	BLCA.induction course complete:	0.0069885	1	1
5	BLCA.maint therapy course complete:	0.0069885	1	1
5	icd o 3 histology: 8171/3	0.0072096	1	1
5	BLCA.complete response observed:	0.0072553	1	1

## Sheet: LGG glioma
archetype #	Feature Name	P value (Hypergeom.)	Significant after Benjamini-Hochberg correction?	Is first bin maximal?
1	neoplasm histologic grade: G3	1.9739e-07	1	1
1	histological type: Astrocytoma	6.0507e-07	1	1
3	tissue source site: HT	1.4547e-06	1	1
3	icd o 3 histology: 9450/3	3.2057e-06	1	1

## Sheet: THCA thyroid
archetype #	Feature Name	P value (Hypergeom.)	Significant after Benjamini-Hochberg correction?	Is first bin maximal?
1	histological type: Thyroid Papillary Carcinoma - Follicular (>= 99	8.4976e-13	1	1
1	icd o 3 histology: 8340/3	4.0168e-12	1	1
1	tissue source site: EM	1.5964e-07	1	1
1	pathologic stage: Stage II	2.6712e-06	1	1
1	pathologic M: MX	1.5023e-05	1	1
1	extrathyroid carcinoma present extension status: None	0.00014428	1	1
1	oct embedded: false	0.00049043	1	1
1	pathologic N: NX	0.00052276	1	1
1	treat.cyclophosphamide: NA	0.0016831	1	1
1	treat.anastrozole: NA	0.0016831	1	1
1	treat.doxorubicin: NA	0.0016831	1	1
1	treat.paclitaxel: NA	0.0016831	1	1
1	treat.tamoxifen: NA	0.0016831	1	1
1	treat.docetaxel: NA	0.0016831	1	1
1	treat.fluorouracil: NA	0.0016831	1	1
1	treat.trastuzumab: NA	0.0016831	1	1
1	treat.epirubicin: NA	0.0016831	1	1
1	treat.letrozole: NA	0.0016831	1	1
1	treat.carboplatin: NA	0.0016831	1	1
1	treat.methotrexate: NA	0.0016831	1	1
1	treat.exemestane: NA	0.0016831	1	1
1	treat.capecitabine: NA	0.0016831	1	1
1	treat.zoledronic.acid: NA	0.0016831	1	1
1	treat.goserelin: NA	0.0016831	1	1
1	treat.bevacizumab: NA	0.0016831	1	1
1	treat.pegfilgrastim: NA	0.0016831	1	1
1	treat.gemcitabine: NA	0.0016831	1	1
1	treat.fulvestrant: NA	0.0016831	1	1
1	treat.vinorelbine: NA	0.0016831	1	1
1	treat.clodronic.acid: NA	0.0016831	1	1
1	treat.triptorelin: NA	0.0016831	1	1
1	treat.pamidronate: NA	0.0016831	1	1
1	treat.leuprolide: NA	0.0016831	1	1
1	treat.lapatinib: NA	0.0016831	1	1
1	treat.denosumab: NA	0.0016831	1	1
1	treat.vincristine: NA	0.0016831	1	1
1	treat.mitoxantrone: NA	0.0016831	1	1
1	treat.mitomycin: NA	0.0016831	1	1
1	treat.toremifene: NA	0.0016831	1	1
1	treat.cisplatin: NA	0.0016831	1	1
1	treat.trabectedin: NA	0.0016831	1	1
1	treat.vinblastine: NA	0.0016831	1	1
1	treat.rituximab: NA	0.0016831	1	1
1	treat.prednisone: NA	0.0016831	1	1
1	treat.pemetrexed: NA	0.0016831	1	1
1	treat.metformin: NA	0.0016831	1	1
1	treat.megestrol: NA	0.0016831	1	1
1	treat.ixabepilone: NA	0.0016831	1	1
1	treat.ifosfamide: NA	0.0016831	1	1
1	treat.ibandronate: NA	0.0016831	1	1
1	treat.everolimus: NA	0.0016831	1	1
1	treat.tesetaxel: NA	0.0016831	1	1
1	treat.green.tea.polyphenol.extract: NA	0.0016831	1	1
1	treat.etoposide: NA	0.0016831	1	1
1	treat.palonosetron: NA	0.0016831	1	1
1	treat.leucovorin: NA	0.0016831	1	1
1	treat.oxaliplatin: NA	0.0016831	1	1
1	treat.irinotecan: NA	0.0016831	1	1
1	treat.cetuximab: NA	0.0016831	1	1
1	treat.panitumumab: NA	0.0016831	1	1
1	treat.floxuridine: NA	0.0016831	1	1
1	treat.filgrastim: NA	0.0016831	1	1
1	treat.dexamethasone: NA	0.0016831	1	1
1	treat.regorafenib: NA	0.0016831	1	1
1	treat.topotecan: NA	0.0016831	1	1
1	treat.temozolomide: NA	0.0016831	1	1
1	treat.thalidomide: NA	0.0016831	1	1
1	treat.teniposide: NA	0.0016831	1	1
1	treat.sorafenib: NA	0.0016831	1	1
1	treat.bortezomib: NA	0.0016831	1	1
1	treat.procarbazine: NA	0.0016831	1	1
1	treat.pembrolizumab: NA	0.0016831	1	1
1	treat.lomustine: NA	0.0016831	1	1
1	treat.nimustine: NA	0.0016831	1	1
1	treat.fotemustine: NA	0.0016831	1	1
1	treat.karenitecin: NA	0.0016831	1	1
1	treat.isotretinoin: NA	0.0016831	1	1
1	treat.imatinib: NA	0.0016831	1	1
1	treat.hydroxyurea: NA	0.0016831	1	1
1	treat.carmustine: NA	0.0016831	1	1
1	treat.erlotinib: NA	0.0016831	1	1
1	treat.cilengitide: NA	0.0016831	1	1
1	treat.celecoxib: NA	0.0016831	1	1
1	treat.afatinib: NA	0.0016831	1	1
1	treat.i131.81c6: NA	0.0016831	1	1
1	treat.ipilimumab: NA	0.0016831	1	1
1	treat.bcg: NA	0.0016831	1	1
1	treat.fosaprepitant: NA	0.0016831	1	1
1	treat.halichondrin.b: NA	0.0016831	1	1
1	treat.nivolumab: NA	0.0016831	1	1
1	treat.vorinostat: NA	0.0016831	1	1
1	treat.temsirolimus: NA	0.0016831	1	1
1	treat.vandetanib: NA	0.0016831	1	1
1	treat.veliparib: NA	0.0016831	1	1
1	treat.sunitinib: NA	0.0016831	1	1
1	treat.gefitinib: NA	0.0016831	1	1
1	treat.cyc116: NA	0.0016831	1	1
1	treat.belinostat: NA	0.0016831	1	1
1	treat.cis.retinoic.acid: NA	0.0016831	1	1
1	treat.lonafarnib: NA	0.0016831	1	1
1	treat.antineoplastons: NA	0.0016831	1	1
1	treat.il.13pe: NA	0.0016831	1	1
1	treat.pyrazinamide: NA	0.0016831	1	1
1	treat.ci.980: NA	0.0016831	1	1
1	treat.thioguanine: NA	0.0016831	1	1
1	treat.o6.bg: NA	0.0016831	1	1
1	treat.mercaptopurine: NA	0.0016831	1	1
1	treat.hydroxychloroquine: NA	0.0016831	1	1
1	treat.pep.3.klh.conjugate.vaccine: NA	0.0016831	1	1
1	treat.aee788: NA	0.0016831	1	1
1	treat.amg.102: NA	0.0016831	1	1
1	treat.angiocept: NA	0.0016831	1	1
1	treat.ap23573: NA	0.0016831	1	1
1	treat.arsenic.trioxide: NA	0.0016831	1	1
1	treat.iniparib: NA	0.0016831	1	1
1	treat.cabozantinib: NA	0.0016831	1	1
1	treat.cediranib: NA	0.0016831	1	1
1	treat.chloroquine: NA	0.0016831	1	1
1	treat.daclizumab: NA	0.0016831	1	1
1	treat.dcvax: NA	0.0016831	1	1
1	treat.enzastaurin: NA	0.0016831	1	1
1	treat.estramustine: NA	0.0016831	1	1
1	treat.fenretinide: NA	0.0016831	1	1
1	treat.vismodegib: NA	0.0016831	1	1
1	treat.hsppc.96: NA	0.0016831	1	1
1	treat.ict.107: NA	0.0016831	1	1
1	treat.interferon.alpha: NA	0.0016831	1	1
1	treat.levetiracetam: NA	0.0016831	1	1
1	treat.mab.i.131: NA	0.0016831	1	1
1	treat.marimastat: NA	0.0016831	1	1
1	treat.medi.575: NA	0.0016831	1	1
1	treat.motexafin.gadolinium: NA	0.0016831	1	1
1	treat.mgi.114: NA	0.0016831	1	1
1	treat.X81c6: NA	0.0016831	1	1
1	treat.oxcarbazepine: NA	0.0016831	1	1
1	treat.X2.methoxyestradiol: NA	0.0016831	1	1
1	treat.phenytoin.sodium: NA	0.0016831	1	1
1	treat.placebo: NA	0.0016831	1	1
1	treat.plexxikon.plx3397: NA	0.0016831	1	1
1	treat.rapamycin: NA	0.0016831	1	1
1	treat.streptozocin: NA	0.0016831	1	1
1	treat.suramin: NA	0.0016831	1	1
1	treat.tipifarnib: NA	0.0016831	1	1
1	treat.valproic.acid: NA	0.0016831	1	1
1	treat.vatalanib: NA	0.0016831	1	1
1	treat.bicalutamide: NA	0.0016831	1	1
1	treat.cabazitaxel: NA	0.0016831	1	1
1	treat.degarelix: NA	0.0016831	1	1
1	treat.ketoconazole: NA	0.0016831	1	1
1	treat.abiraterone: NA	0.0016831	1	1
1	treat.nilutamide: NA	0.0016831	1	1
1	treat.levothyroxine: NA	0.0016831	1	1
1	treat.liothyronine: NA	0.0016831	1	1
1	treat.actinomycin.d: NA	0.0016831	1	1
1	treat.aflibercept: NA	0.0016831	1	1
1	treat.melphalan: NA	0.0016831	1	1
1	treat.axitinib: NA	0.0016831	1	1
1	treat.bleomycin: NA	0.0016831	1	1
1	treat.cancer.vaccine: NA	0.0016831	1	1
1	treat.ciclosporin: NA	0.0016831	1	1
1	treat.dabrafenib: NA	0.0016831	1	1
1	treat.dacarbazine: NA	0.0016831	1	1
1	treat.diphenylcyclopropenone: NA	0.0016831	1	1
1	treat.erythropoietin: NA	0.0016831	1	1
1	treat.sargramostim: NA	0.0016831	1	1
1	treat.gp100: NA	0.0016831	1	1
1	treat.il.18: NA	0.0016831	1	1
1	treat.il.2: NA	0.0016831	1	1
1	treat.imiquimod: NA	0.0016831	1	1
1	treat.mage.3.vaccine: NA	0.0016831	1	1
1	treat.morab.004: NA	0.0016831	1	1
1	treat.rose.bengal: NA	0.0016831	1	1
1	treat.amino.acid: NA	0.0016831	1	1
1	treat.resiquimod: NA	0.0016831	1	1
1	treat.talimogene.laherparepvec: NA	0.0016831	1	1
1	treat.trametinib: NA	0.0016831	1	1
1	treat.treosulfan: NA	0.0016831	1	1
1	treat.vemurafenib: NA	0.0016831	1	1
1	treat.ondansetron: NA	0.0016831	1	1
1	treat.radiotherapy: NA	0.0016831	1	1
1	treat.target.angiogenesis.signalling.inhibitor: NA	0.0016831	1	1
1	treat.target.growth.signalling.inhibitor: NA	0.0016831	1	1
1	treat.target.sex.hormone.signalling.inhibition: NA	0.0016831	1	1
1	treat.target.microtubule: NA	0.0016831	1	1
1	treat.target.DNA.damaging: NA	0.0016831	1	1
1	treat.target.topoisomerase.inhibitor: NA	0.0016831	1	1
1	treat.target.nucleotide.depletion: NA	0.0016831	1	1
1	treat.target.epigenetics: NA	0.0016831	1	1
1	treat.target.DNA.repair.inhibition: NA	0.0016831	1	1
1	treat.target.immuno.stimmulation: NA	0.0016831	1	1
1	treat.target.immuno.targetting: NA	0.0016831	1	1
1	treat.target.anti.immuno.evasion: NA	0.0016831	1	1
1	treat.target.immunosuppressor: NA	0.0016831	1	1
1	treat.target.support: NA	0.0016831	1	1
1	treat.target.pro.cell.death: NA	0.0016831	1	1
1	treat.target.anti.bacterial...anti.parasite: NA	0.0016831	1	1
1	treat.target.other: NA	0.0016831	1	1
1	treat.patientBestResp: NA	0.0019327	1	1
1	pathologic T: T2	0.0040423	1	1
2	i 131 first administered dose: 152 mCi	0.003624	1	1
2	i 131 total administered dose: 152 mCi	0.003624	1	1
3	tissue source site: L6	9.3322e-05	1	1
3	radiation therapy: YES	0.0002322	1	1
3	tissue source site: KS	0.00045931	1	1
3	i 131 total administered preparation technique: Thyroxine withdrawal	0.0024972	1	1
3	metastatic neoplasm confirmed diagnosis method name: Biopsy Proven	0.003624	1	1
4	icd o 3 histology: 8260/3	0.0004226	1	1
4	histological type: Thyroid Papillary Carcinoma - Classical/usual	0.0016009	1	1
4	tissue prospective collection indicator: YES	0.0019269	1	1
4	tissue retrospective collection indicator: NO	0.0019269	1	1
4	person neoplasm cancer status:	0.001974	1	1

## Sheet: BRCA breast
archetype #	Feature Name	P value (Hypergeom.)	Significant after Benjamini-Hochberg correction?	Is first bin maximal?
1	INTCLUST: 10	0	1	1
1	ER IHC: neg	0	1	1
1	Pam50 SUBTYPE: Basal	0	1	1
1	THREEGENE: ER-/HER2-	0	1	1
1	ER STATUS: -	0	1	1
1	PR STATUS: -	0	1	1
1	CLAUDIN SUBTYPE: Basal	0	1	1
1	CHEMOTHERAPY: YES	0	1	1
1	HORMONE THERAPY: NO	0	1	1
1	INFERRED MENOPAUSAL STATE: pre	1.1812e-08	1	1
1	CELLULARITY: high	6.3023e-07	1	1
1	RADIO THERAPY: YES	2.3189e-05	1	1
1	OS STATUS: LIVING	0.000292	1	1
2	INTCLUST: 4ER+	0	1	1
2	COHORT: 1	0	1	1
2	Pam50 SUBTYPE: Normal	0	1	1
2	CLAUDIN SUBTYPE: claudin-low	0	1	1
2	CELLULARITY: low	2.4121e-12	1	1
2	INTCLUST: 4ER-	8.212e-06	1	1
2	HER2 SNP6: NEUT	1.2638e-05	1	1
2	THREEGENE: ER-/HER2-	1.7461e-05	1	1
2	HER2 STATUS: -	2.043e-05	1	1
2	OS STATUS: LIVING	0.00013295	1	1
2	ER IHC: NA	0.00019245	1	1
2	CELLULARITY: null	0.00020479	1	1
2	TUMOR STAGE: 0	0.0021758	1	1
2	DFS STATUS: DiseaseFree	0.0067891	1	1
3	Pam50 SUBTYPE: LumB	0	1	1
3	CLAUDIN SUBTYPE: LumB	0	1	1
3	COHORT: 1	6.0986e-11	1	1
3	HER2 STATUS: -	2.043e-05	1	1
3	INFERRED MENOPAUSAL STATE: post	0.010236	1	1
4	COHORT: 3	0	1	1
4	THREEGENE: null	0	1	1
4	CLAUDIN SUBTYPE: Her2	1.4012e-09	1	1
4	Pam50 SUBTYPE: Her2	9.1902e-09	1	1
4	HORMONE THERAPY: NO	0.00032969	1	1
4	INTCLUST: 7	0.0019671	1	1
4	BREAST SURGERY: MASTECTOMY	0.0053693	1	1

## Sheet: BLCA bladder
archetype #	Feature Name	P value (Hypergeom.)	Significant after Benjamini-Hochberg correction?	Is first bin maximal?
1	tissue source site: FD	0.00019677	1	1
2	X PANCAN UNC RNAseq PANCAN K16: squamous-like c4	1.2101e-12	1	1
2	X PANCAN miRNA PANCAN: miRNA cluster 11	2.5302e-07	1	1
2	X PANCAN Cluster Cluster PANCAN: C2-Squamous-like	2.7034e-07	1	1
2	X PANCAN mirna BLCA: cluster 3	2.2348e-05	1	1
3	neoplasm histologic grade: Low Grade	2.5302e-07	1	1
3	tissue source site: CF	2.5302e-07	1	1
3	pathologic T: T2	2.2346e-06	1	1
3	primary lymph node presentation assessment: NO	2.652e-06	1	1
3	icd o 3 histology: 8130/3	2.931e-06	1	1
3	diagnosis subtype: Papillary	4.0812e-05	1	1
3	pathologic stage: Stage II	0.00014151	1	1

## Sheet: LIHC liver
archetype #	Feature Name	P value (Hypergeom.)	Significant after Benjamini-Hochberg correction?	Is first bin maximal?

## Sheet: COAD colon
archetype #	Feature Name	P value (Hypergeom.)	Significant after Benjamini-Hochberg correction?	Is first bin maximal?
1	postoperative rx tx:	0.0002028	1	1
1	radiation therapy:	0.0002028	1	1
3	CDE ID 3226963: MSI-H	1.5354e-13	1	1
3	X PANCAN DNAMethyl PANCAN: COADREAD CIMP c12	4.1074e-12	1	1
3	X PANCAN CNA PANCAN K8: Kirc+	4.8843e-07	1	1
3	microsatellite instability: YES	0.00020266	1	1
4	X PANCAN miRNA PANCAN: miRNA cluster 5	1.4135e-09	1	1
4	tissue source site: F4	2.7164e-05	1	1
