# Supplementary material for: Tumor diversity and the trade-off between universal cancer tasks
Source: Nat Commun. 2019 Nov 28;10:5423. doi: 10.1038/s41467-019-13195-1 (PMC6882839; doi:10.1038/s41467-019-13195-1)
Supplement: Supplementary file 6 — Supplementary Data 3 [file 41467_2019_13195_MOESM6_ESM.xlsx]

## Sheet: All 6 cancer types
archetype #	Feature Name	P value (Mann-Whitney)	Median Difference	Mean Difference	Significant after Benjamini-Hochberg correction?	Is first bin maximal?
1	percent tumor nuclei BOTTOM	9.5899e-09	10	11.2129	1	1
1	age at initial pathologic diagnosis	3.1865e-08	9.5	8.062	1	1
1	BRCA.Age at Initial Pathologic Diagnosis nature2012	1.7353e-05	8.5	6.6764	1	1
1	percent tumor cells TOP	5.6882e-05	5	6.3752	1	1
1	percent tumor nuclei TOP	1.8164e-12	5	6.4097	1	1
1	ESTIMATE	5.6995e-51	0.10725	0.12508	1	1
2	year of initial pathologic diagnosis	1.23e-09	1	1.2621	1	1
3	number of CNAs	6.4835e-45	750	586.269	1	1
3	X RFS	6.3903e-06	258.5	334.108	1	1
3	X OS	0.0010855	224.5	275.35	1	1
3	X TIME TO EVENT	0.0010855	224.5	275.35	1	1
3	days to last followup	0.0035525	175	266.503	1	1
3	percent necrosis BOTTOM	1.2855e-08	2	3.9402	1	1
3	percent necrosis TOP	8.4896e-15	1	2.3237	1	1
3	number of CNAs frac	8.8403e-27	0.27627	0.2512	1	1
3	number of SNVs frac	2.8324e-13	0.26041	0.18834	1	1
4	LIHC.lab procedure platelet result specified value	0.01428	276	92085.5	1	1
4	initial weight	0.0029667	80	48.6164	1	1
4	percent tumor cells BOTTOM	0.00029067	20	10.4253	1	1
4	number of SNVs	0.00017043	5	0.095995	1	1
5	percent stromal cells BOTTOM	0.00055292	10	11.1935	1	1
5	percent normal cells BOTTOM	1.6514e-05	5	6.4388	1	1
5	percent stromal cells TOP	0.00061044	5	5.6173	1	1
5	lymph node examined count	0.003114	3	3.5617	1	1
5	number of lymphnodes positive by he	0.00048637	1	1.838	1	1
5	longest dimension	0.0011836	0.3	0.33318	1	1

## Sheet: LGG glioma
archetype #	Feature Name	P value (Mann-Whitney)	Median Difference	Mean Difference	Significant after Benjamini-Hochberg correction?	Is first bin maximal?
1	age at initial pathologic diagnosis	6.1148e-08	18	11.5478	1	1
2	number of CNAs	0.021142	71	62.7344	1	1
2	percent tumor nuclei BOTTOM	4.238e-06	10	9.9186	1	1
2	percent tumor nuclei TOP	1.36e-06	5	6.3315	1	1
2	number of CNAs frac	0.021142	0.15595	0.095485	1	1
2	ESTIMATE	3.1348e-11	0.0449	0.058648	1	1
3	longest dimension	0.0061059	0.2	0.29051	1	1
3	ESTIMATE	3.0154e-12	0.0452	0.058943	1	1

## Sheet: THCA thyroid
archetype #	Feature Name	P value (Mann-Whitney)	Median Difference	Mean Difference	Significant after Benjamini-Hochberg correction?	Is first bin maximal?
1	age at initial pathologic diagnosis	0.0045162	9	6.8438	1	1
1	percent tumor nuclei TOP	0.012033	5	4.2997	1	1
1	ESTIMATE	2.3472e-21	0.08595	0.10554	1	1
2	number of SNVs	0.003514	1	1.1264	1	1
2	neoplasm depth	0.014328	0.5	0.40644	1	1
2	number of SNVs frac	0.003514	0.12259	0.12498	1	1
2	ESTIMATE	3.7696e-11	0.0563	0.080653	1	1
3	percent tumor nuclei TOP	0.008474	6	4.0921	1	1
4	percent stromal cells TOP	9.818e-05	13	8.2354	1	1
4	lymph node examined count	0.0016077	7	6.6415	1	1
4	percent lymphocyte infiltration TOP	2.0652e-07	3	4.6634	1	1
4	number of lymphnodes positive by he	0.0078658	1.5	2.7147	1	1

## Sheet: BRCA breast
archetype #	Feature Name	P value (Mann-Whitney)	Median Difference	Mean Difference	Significant after Benjamini-Hochberg correction?	Is first bin maximal?
3	number of CNAs	8.1334e-05	99	83.3978	1	1
3	AGE AT DIAGNOSIS	0.00038128	5.81	4.8332	1	1
4	number of CNAs	0.031518	59	52.7038	1	1
4	OS MONTHS	7.764e-05	41.1667	37.2164	1	1
4	DFS MONTHS	7.764e-05	41.1667	37.2164	1	1
4	number of SNVs	1.0959e-05	1	1.229	1	1

## Sheet: BLCA bladder
archetype #	Feature Name	P value (Mann-Whitney)	Median Difference	Mean Difference	Significant after Benjamini-Hochberg correction?	Is first bin maximal?
2	percent necrosis TOP	2.4513e-08	3.5	5.1313	1	1
3	percent tumor cells TOP	9.6373e-07	15	11.6176	1	1
3	percent tumor nuclei TOP	4.0911e-07	10	7.9593	1	1
3	ESTIMATE	5.0396e-24	0.1226	0.15762	1	1

## Sheet: LIHC liver
archetype #	Feature Name	P value (Mann-Whitney)	Median Difference	Mean Difference	Significant after Benjamini-Hochberg correction?	Is first bin maximal?
1	ESTIMATE	3.7012e-09	0.0588	0.068513	1	1
2	percent tumor nuclei TOP	2.2802e-05	9	6.6471	1	1
2	ESTIMATE	2.3395e-16	0.0708	0.087145	1	1
4	weight	2.4214e-05	13.5	12.9754	1	1
4	height	0.0034478	5	4.6073	1	1
5	number of CNAs	0.00048079	284.5	194.315	1	1
5	number of CNAs frac	0.00048079	0.20853	0.13684	1	1

## Sheet: COAD colon
archetype #	Feature Name	P value (Mann-Whitney)	Median Difference	Mean Difference	Significant after Benjamini-Hochberg correction?	Is first bin maximal?
1	ESTIMATE	7.3319e-18	0.09845	0.11395	1	1
2	days to last followup	0.0050193	203	240.909	1	1
2	ESTIMATE	8.8752e-09	0.0655	0.08698	1	1
3	number of SNVs	1.1049e-05	275	334.409	1	1
3	number of SNVs frac	1.1049e-05	0.33232	0.18665	1	1
4	percent normal cells TOP	0.0025151	5	6.1003	1	1
4	longest dimension	0.0058518	0.3	0.28137	1	1
4	intermediate dimension	0.001037	0.2	0.2614	1	1
4	shortest dimension	0.00038768	0.1	0.11027	1	1
