# Supplementary material for: Tumor diversity and the trade-off between universal cancer tasks
Source: Nat Commun. 2019 Nov 28;10:5423. doi: 10.1038/s41467-019-13195-1 (PMC6882839; doi:10.1038/s41467-019-13195-1)
Supplement: Supplementary file 7 — Supplementary Data 4 [file 41467_2019_13195_MOESM7_ESM.xlsx]

## Sheet: alnDriversOrient_SNVs
cancer	alteration	orientation	frequency
COAD	APC	archetype: cell division	152
COAD	TP53	archetype: cell division	117
COAD	GNAS	edge: lipogenesis - biomass & energy	21
COAD	ATM	edge: lipogenesis - biomass & energy	27
HNSC	NOTCH1	edge: biomass & energy - invasion & tissue remodeling	87
LGG	IDH1	archetype: cell division	398
LGG	EGFR	archetype: immune interaction	35
LGG	PTEN	archetype: immune interaction	25
LUAD	STK11	edge: cell division - biomass & energy	75
LUAD	TP53	edge: cell division - immune interaction	261
LUAD	SMARCA4	archetype: cell division	37
THCA	BRAF	face: lipogenesis - biomass & energy - invasion & tissue remodeling	250
THCA	HRAS	archetype: biomass & energy	15
THCA	NRAS	archetype: biomass & energy	34
BRCA	PIK3CA	face: invasion & tissue remodeling - biomass & energy - HER2	789
BRCA	MAP3K1	face: invasion & tissue remodeling - biomass & energy - HER2	197
BRCA	GATA3	face: invasion & tissue remodeling - biomass & energy - HER2	227
BRCA	TBX3	face: invasion & tissue remodeling - biomass & energy - HER2	98
BRCA	CDH1	face: invasion & tissue remodeling - biomass & energy - HER2	170
BRCA	TP53	archetype: cell division	656
BRCA	RB1	archetype: cell division	48
