# Supplementary material for: Tumor diversity and the trade-off between universal cancer tasks
Source: Nat Commun. 2019 Nov 28;10:5423. doi: 10.1038/s41467-019-13195-1 (PMC6882839; doi:10.1038/s41467-019-13195-1)
Supplement: Supplementary file 8 — Supplementary Data 5 [file 41467_2019_13195_MOESM8_ESM.xlsx]

## Sheet: alnDriversOrient_CNAs
cancer	alteration	orientation
BLCA	TSC1(-1)	archetype: biomass & energy
BLCA	NOTCH1(-1)	archetype: biomass & energy
COAD	ARID1A(-1)	archetype: cell division
COAD	NRAS(-1)	archetype: cell division
COAD	DNMT3A(1)	edge: cell division - invasion & tissue remodeling
COAD	CTNNB1(1)	face: cell division - lipogenesis - invasion & tissue remodeling
COAD	CTNNB1(-1)	archetype: cell division
COAD	FOXP1(-1)	edge: cell division - invasion & tissue remodeling
COAD	FOXP1(1)	face: cell division - lipogenesis - invasion & tissue remodeling
COAD	MECOM(-1)	archetype: cell division
COAD	MECOM(1)	face: cell division - lipogenesis - invasion & tissue remodeling
COAD	PIK3CA(-1)	archetype: cell division
COAD	PIK3CA(1)	face: cell division - lipogenesis - invasion & tissue remodeling
COAD	FBXW7(-1)	edge: cell division - invasion & tissue remodeling
COAD	PIK3R1(-1)	edge: cell division - invasion & tissue remodeling
COAD	APC(-1)	edge: cell division - invasion & tissue remodeling
COAD	EGFR(1)	archetype: cell division
COAD	BRAF(1)	face: cell division - lipogenesis - invasion & tissue remodeling
COAD	GATA3(-1)	edge: cell division - invasion & tissue remodeling
COAD	PTEN(1)	archetype: cell division
COAD	PTEN(-1)	edge: cell division - invasion & tissue remodeling
COAD	TCF7L2(-1)	archetype: cell division
COAD	WT1(-1)	edge: cell division - invasion & tissue remodeling
COAD	WT1(1)	archetype: cell division
COAD	ATM(-1)	face: cell division - lipogenesis - invasion & tissue remodeling
COAD	ATM(1)	archetype: cell division
COAD	KRAS(-1)	archetype: cell division
COAD	PTPN11(-1)	edge: cell division - invasion & tissue remodeling
COAD	IDH2(-1)	edge: cell division - invasion & tissue remodeling
COAD	CREBBP(-1)	edge: cell division - invasion & tissue remodeling
COAD	CREBBP(1)	edge: cell division - invasion & tissue remodeling
COAD	TP53(-1)	archetype: cell division
COAD	NF1(-1)	face: cell division - lipogenesis - invasion & tissue remodeling
COAD	NF1(1)	archetype: cell division
COAD	SMAD4(-1)	archetype: cell division
COAD	SMAD4(-2)	archetype: cell division
COAD	PPP2R1A(-1)	archetype: cell division
COAD	PPP2R1A(1)	face: cell division - lipogenesis - invasion & tissue remodeling
COAD	GNAS(2)	archetype: cell division
COAD	GNAS(1)	archetype: cell division
COAD	RUNX1(-1)	edge: cell division - invasion & tissue remodeling
COAD	RUNX1(1)	edge: cell division - lipogenesis
LGG	ARID1A(-1)	edge: cell division - invasion & tissue remodeling
LGG	EGFR(2)	archetype: immune interaction
LGG	EGFR(1)	archetype: immune interaction
LGG	MET(1)	archetype: immune interaction
LGG	PTEN(-1)	archetype: immune interaction
LIHC	ARID1A(1)	edge: cell division - immune interaction
LIHC	ARID1A(-1)	edge: biomass & energy - immune interaction
LIHC	NFE2L2(1)	face: cell division - biomass & energy - immune interaction
LIHC	IDH1(1)	face: cell division - biomass & energy - immune interaction
LIHC	IDH1(-1)	face: cell division - biomass & energy - immune interaction
LIHC	CTNNB1(-1)	edge: biomass & energy - immune interaction
LIHC	CTNNB1(1)	face: lipogenesis - cell division - biomass & energy
LIHC	PBRM1(1)	face: lipogenesis - cell division - biomass & energy
LIHC	PBRM1(-1)	archetype: immune interaction
LIHC	PIK3CA(1)	face: cell division - biomass & energy - immune interaction
LIHC	APC(1)	archetype: biomass & energy
LIHC	APC(-1)	edge: biomass & energy - immune interaction
LIHC	PTEN(-2)	face: cell division - invasion & tissue remodeling - immune interaction
LIHC	PTEN(1)	face: cell division - biomass & energy - immune interaction
LIHC	PTEN(-1)	edge: cell division - immune interaction
LIHC	ARID2(1)	edge: biomass & energy - immune interaction
LIHC	FLT3(-1)	edge: cell division - immune interaction
LIHC	FLT3(1)	edge: cell division - immune interaction
LIHC	TP53(-1)	edge: cell division - immune interaction
LIHC	TP53(1)	face: cell division - biomass & energy - immune interaction
LIHC	NF1(1)	face: cell division - biomass & energy - immune interaction
LIHC	NF1(-1)	archetype: immune interaction
LUAD	ARID1A(-1)	archetype: cell division
LUAD	NRAS(-1)	edge: cell division - biomass & energy
LUAD	PRRX1(2)	edge: cell division - biomass & energy
LUAD	PRRX1(1)	edge: cell division - biomass & energy
LUAD	DNMT3A(1)	archetype: cell division
LUAD	NFE2L2(1)	archetype: cell division
LUAD	IDH1(1)	archetype: cell division
LUAD	MLH1(-1)	archetype: cell division
LUAD	CTNNB1(-1)	archetype: cell division
LUAD	SETD2(-1)	archetype: cell division
LUAD	BAP1(-1)	archetype: cell division
LUAD	PBRM1(-1)	archetype: cell division
LUAD	FBXW7(1)	edge: cell division - immune interaction
LUAD	FBXW7(-1)	archetype: cell division
LUAD	PIK3R1(-1)	edge: cell division - immune interaction
LUAD	NPM1(-1)	archetype: cell division
LUAD	EGFR(-1)	archetype: cell division
LUAD	EGFR(1)	edge: cell division - immune interaction
LUAD	MET(2)	edge: cell division - immune interaction
LUAD	PTEN(1)	archetype: cell division
LUAD	TCF7L2(1)	archetype: cell division
LUAD	FGFR2(1)	archetype: cell division
LUAD	KRAS(1)	edge: cell division - immune interaction
LUAD	PTPN11(1)	archetype: cell division
LUAD	RB1(1)	face: cell division - immune interaction - biomass & energy
LUAD	AKT1(-1)	archetype: cell division
LUAD	CREBBP(-1)	edge: cell division - immune interaction
LUAD	CDH1(-1)	edge: cell division - immune interaction
LUAD	MAP2K4(1)	archetype: cell division
LUAD	NF1(-1)	face: cell division - immune interaction - biomass & energy
LUAD	SMAD4(-1)	edge: cell division - immune interaction
LUAD	SMAD4(1)	archetype: cell division
LUAD	STK11(-2)	archetype: cell division
LUAD	STK11(1)	archetype: cell division
LUAD	STK11(-1)	archetype: cell division
LUAD	SMARCA4(-2)	archetype: cell division
LUAD	SMARCA4(-1)	edge: cell division - biomass & energy
LUAD	PPP2R1A(1)	archetype: cell division
LUAD	PPP2R1A(-1)	face: cell division - immune interaction - biomass & energy
LUAD	U2AF1(-1)	archetype: cell division
LUAD	EP300(-1)	edge: cell division - immune interaction
LUAD	KDM6A(1)	face: cell division - immune interaction - biomass & energy
LUAD	KDM6A(-2)	face: cell division - immune interaction - biomass & energy
LUAD	PHF6(-1)	face: cell division - immune interaction - biomass & energy
THCA	KRAS(1)	archetype: biomass & energy
THCA	ARID2(1)	archetype: biomass & energy
THCA	TP53(1)	archetype: biomass & energy
BRCA	AGTR2(1)	face: cell division - biomass & energy - HER2
BRCA	AKT1(1)	edge: cell division - biomass & energy
BRCA	AKT2(1)	archetype: cell division
BRCA	APC(-1)	archetype: cell division
BRCA	ARID1A(-1)	edge: biomass & energy - HER2
BRCA	ARID1B(-1)	edge: biomass & energy - HER2
BRCA	ASXL1(-1)	archetype: biomass & energy
BRCA	ATM(-1)	edge: biomass & energy - HER2
BRCA	ATRX(-1)	face: cell division - biomass & energy - HER2
BRCA	AURKA(1)	face: cell division - biomass & energy - HER2
BRCA	AXIN1(1)	edge: biomass & energy - HER2
BRCA	AXIN1(-1)	archetype: cell division
BRCA	BCOR(-1)	face: cell division - biomass & energy - HER2
BRCA	BRAF(2)	edge: cell division - HER2
BRCA	BRAF(1)	archetype: cell division
BRCA	BRCA1(1)	edge: biomass & energy - HER2
BRCA	BRCA2(-1)	edge: biomass & energy - HER2
BRCA	BUB1B(-1)	archetype: cell division
BRCA	C8orf4(1)	face: cell division - biomass & energy - HER2
BRCA	CBFB(-1)	edge: biomass & energy - HER2
BRCA	CBLB(-1)	edge: biomass & energy - HER2
BRCA	CCND1(2)	edge: biomass & energy - HER2
BRCA	CCND3(1)	archetype: cell division
BRCA	CCND3(2)	archetype: cell division
BRCA	CCNE1(1)	archetype: cell division
BRCA	CCNE1(2)	archetype: cell division
BRCA	CDH1(1)	face: cell division - biomass & energy - HER2
BRCA	CDH1(-1)	edge: biomass & energy - HER2
BRCA	CDK6(1)	archetype: cell division
BRCA	CDK6(2)	archetype: cell division
BRCA	CDKN1B(-1)	edge: biomass & energy - HER2
BRCA	CDKN2A(1)	archetype: cell division
BRCA	CDKN2A(-1)	face: cell division - biomass & energy - HER2
BRCA	CDKN2A(-2)	edge: cell division - biomass & energy
BRCA	CDKN2B(-1)	face: cell division - biomass & energy - HER2
BRCA	CHEK2(-1)	edge: biomass & energy - HER2
BRCA	CIC(-1)	edge: cell division - biomass & energy
BRCA	CREBBP(-1)	archetype: cell division
BRCA	CTCF(-1)	edge: biomass & energy - HER2
BRCA	CTCF(1)	edge: cell division - biomass & energy
BRCA	CTNNA1(-1)	archetype: cell division
BRCA	CUX1(-1)	archetype: biomass & energy
BRCA	DNMT3A(-1)	edge: biomass & energy - HER2
BRCA	ECT2L(-1)	edge: biomass & energy - HER2
BRCA	ECT2L(-2)	edge: biomass & energy - HER2
BRCA	EGFR(2)	archetype: cell division
BRCA	EMSY(2)	edge: biomass & energy - HER2
BRCA	ERBB3(1)	face: cell division - biomass & energy - HER2
BRCA	ESR1(1)	face: cell division - biomass & energy - HER2
BRCA	ESR1(2)	archetype: HER2
BRCA	FGFR1(1)	face: cell division - biomass & energy - HER2
BRCA	FGFR2(1)	archetype: cell division
BRCA	FOXO3(-1)	edge: biomass & energy - HER2
BRCA	FOXP1(-1)	face: cell division - biomass & energy - HER2
BRCA	GATA3(-1)	edge: biomass & energy - HER2
BRCA	GATA3(2)	archetype: cell division
BRCA	GATA3(1)	archetype: cell division
BRCA	GNAS(1)	face: cell division - biomass & energy - HER2
BRCA	GPS2(-1)	edge: biomass & energy - HER2
BRCA	HRAS(1)	archetype: biomass & energy
BRCA	IGF1R(1)	archetype: cell division
BRCA	KDM6A(-1)	archetype: cell division
BRCA	KMT2C(-1)	edge: biomass & energy - HER2
BRCA	KRAS(1)	archetype: cell division
BRCA	MAP2K4(-2)	edge: biomass & energy - HER2
BRCA	MAP2K4(-1)	edge: biomass & energy - HER2
BRCA	MAP3K1(-1)	archetype: cell division
BRCA	MED23(-1)	edge: biomass & energy - HER2
BRCA	MEN1(-1)	edge: biomass & energy - HER2
BRCA	MLLT4(-1)	archetype: biomass & energy
BRCA	MSH2(-1)	archetype: biomass & energy
BRCA	MTDH(1)	face: cell division - biomass & energy - HER2
BRCA	MYC(1)	archetype: cell division
BRCA	MYC(2)	face: cell division - biomass & energy - HER2
BRCA	NCOA3(1)	face: cell division - biomass & energy - HER2
BRCA	NCOR1(-1)	edge: biomass & energy - HER2
BRCA	NF2(-1)	edge: biomass & energy - HER2
BRCA	NOTCH2(-1)	edge: biomass & energy - HER2
BRCA	NRAS(1)	face: cell division - biomass & energy - HER2
BRCA	PAK1(2)	edge: biomass & energy - HER2
BRCA	PAK1(1)	face: cell division - biomass & energy - HER2
BRCA	PDGFRA(1)	archetype: cell division
BRCA	PHF6(-1)	face: cell division - biomass & energy - HER2
BRCA	PIK3CA(1)	archetype: cell division
BRCA	PIK3R1(-1)	archetype: cell division
BRCA	PIK3R1(1)	edge: biomass & energy - HER2
BRCA	PLA2G10(1)	edge: biomass & energy - HER2
BRCA	PLA2G10(2)	edge: biomass & energy - HER2
BRCA	PPM1D(1)	face: cell division - biomass & energy - HER2
BRCA	PRDM1(-1)	edge: biomass & energy - HER2
BRCA	PREX2(2)	face: cell division - biomass & energy - HER2
BRCA	PREX2(1)	face: cell division - biomass & energy - HER2
BRCA	PTEN(1)	archetype: biomass & energy
BRCA	PTEN(-1)	archetype: cell division
BRCA	PTEN(-2)	edge: cell division - biomass & energy
BRCA	PTK6(1)	edge: cell division - biomass & energy
BRCA	RB1(-2)	archetype: cell division
BRCA	RB1(-1)	edge: biomass & energy - HER2
BRCA	RPS6KB1(1)	face: cell division - biomass & energy - HER2
BRCA	RUNX1(-1)	edge: biomass & energy - HER2
BRCA	RUVBL1(1)	archetype: cell division
BRCA	SF3B1(1)	archetype: cell division
BRCA	SMAD4(-1)	face: cell division - biomass & energy - HER2
BRCA	SPEN(-1)	face: cell division - biomass & energy - HER2
BRCA	STAG2(-1)	face: cell division - biomass & energy - HER2
BRCA	TET2(1)	archetype: cell division
BRCA	TP53(-1)	edge: biomass & energy - HER2
BRCA	USP9X(-1)	face: cell division - biomass & energy - HER2
BRCA	XBP1(-1)	edge: biomass & energy - HER2
BRCA	YWHAB(1)	face: cell division - biomass & energy - HER2
BRCA	ZFP36L1(-1)	face: cell division - biomass & energy - HER2
BRCA	ZNF217(1)	face: cell division - biomass & energy - HER2
BRCA	ZNF703(1)	face: cell division - biomass & energy - HER2
