# Supplementary material for: Tumor diversity and the trade-off between universal cancer tasks
Source: Nat Commun. 2019 Nov 28;10:5423. doi: 10.1038/s41467-019-13195-1 (PMC6882839; doi:10.1038/s41467-019-13195-1)
Supplement: Supplementary file 9 — Supplementary Data 6 [file 41467_2019_13195_MOESM9_ESM.xlsx]

## Sheet: univArchetypes_tissueSpecific_MSigDB
archetype	tissue	Tissue-specific MSigDB genes enriched at archetype
lipogenesis	THCA	N TERMINAL PROTEIN AMINO ACID MODIFICATION
lipogenesis	THCA	BIOCARTA MTOR PATHWAY
lipogenesis	THCA	POST GOLGI VESICLE MEDIATED TRANSPORT
lipogenesis	THCA	PROTEIN AMINO ACID AUTOPHOSPHORYLATION
lipogenesis	THCA	ANDROGEN RECEPTOR SIGNALING PATHWAY
lipogenesis	THCA	REACTOME VITAMIN B5 PANTOTHENATE METABOLISM
lipogenesis	THCA	REACTOME MTORC1 MEDIATED SIGNALLING
lipogenesis	THCA	REACTOME DEADENYLATION OF MRNA
lipogenesis	THCA	REACTOME SYNTHESIS OF PIPS AT THE GOLGI MEMBRANE
lipogenesis	THCA	NUCLEOTIDE EXCISION REPAIR
lipogenesis	LIHC	REACTOME SYNTHESIS OF BILE ACIDS AND BILE SALTS VIA 7ALPHA HYDROXYCHOLESTEROL
lipogenesis	LIHC	REACTOME RECYCLING OF BILE ACIDS AND SALTS
lipogenesis	LIHC	KEGG PENTOSE AND GLUCURONATE INTERCONVERSIONS
lipogenesis	LIHC	KEGG LIMONENE AND PINENE DEGRADATION
lipogenesis	LIHC	KEGG PORPHYRIN AND CHLOROPHYLL METABOLISM
lipogenesis	LIHC	HEME BIOSYNTHETIC PROCESS
lipogenesis	LIHC	REACTOME SULFUR AMINO ACID METABOLISM
lipogenesis	LIHC	TRANSITION METAL ION TRANSMEMBRANE TRANSPORTER ACTIVITY
lipogenesis	LIHC	REACTOME PACKAGING OF TELOMERE ENDS
lipogenesis	LIHC	KEGG BUTANOATE METABOLISM
lipogenesis	LIHC	HEME METABOLIC PROCESS
lipogenesis	LIHC	PID BETACATENIN DEG PATHWAY
lipogenesis	LIHC	KEGG OTHER GLYCAN DEGRADATION
lipogenesis	LIHC	REACTOME SYNTHESIS OF PE
lipogenesis	LIHC	COFACTOR BIOSYNTHETIC PROCESS
lipogenesis	LIHC	REACTOME VITAMIN B5 PANTOTHENATE METABOLISM
lipogenesis	LIHC	RESPONSE TO HEAT
lipogenesis	LIHC	REACTOME AMYLOIDS
lipogenesis	LIHC	REACTOME METABOLISM OF VITAMINS AND COFACTORS
lipogenesis	LIHC	PROTEIN TRANSPORTER ACTIVITY
lipogenesis	LIHC	REGULATION OF CATABOLIC PROCESS
lipogenesis	LIHC	N TERMINAL PROTEIN AMINO ACID MODIFICATION
lipogenesis	COAD	KEGG PENTOSE AND GLUCURONATE INTERCONVERSIONS
lipogenesis	COAD	COFACTOR CATABOLIC PROCESS
lipogenesis	COAD	KEGG PORPHYRIN AND CHLOROPHYLL METABOLISM
lipogenesis	COAD	KEGG DRUG METABOLISM OTHER ENZYMES
lipogenesis	COAD	KEGG BUTANOATE METABOLISM
lipogenesis	COAD	REACTOME RECYCLING OF BILE ACIDS AND SALTS
lipogenesis	COAD	FATTY ACID OXIDATION
lipogenesis	COAD	KEGG LIMONENE AND PINENE DEGRADATION
lipogenesis	COAD	GLUTAMINE FAMILY AMINO ACID METABOLIC PROCESS
lipogenesis	COAD	HEME BIOSYNTHETIC PROCESS
lipogenesis	COAD	TRICARBOXYLIC ACID CYCLE INTERMEDIATE METABOLIC PROCESS
lipogenesis	COAD	HEME METABOLIC PROCESS
lipogenesis	COAD	COFACTOR BIOSYNTHETIC PROCESS
lipogenesis	COAD	AMINO ACID CATABOLIC PROCESS
lipogenesis	COAD	KEGG MATURITY ONSET DIABETES OF THE YOUNG
biomass & energy	THCA	REACTOME RECYCLING OF BILE ACIDS AND SALTS
biomass & energy	THCA	REACTOME PACKAGING OF TELOMERE ENDS
biomass & energy	THCA	REACTOME RNA POL I PROMOTER OPENING
biomass & energy	THCA	REACTOME AMINE DERIVED HORMONES
biomass & energy	THCA	AMINO ACID CATABOLIC PROCESS
biomass & energy	THCA	KEGG LIMONENE AND PINENE DEGRADATION
biomass & energy	THCA	KEGG BUTANOATE METABOLISM
biomass & energy	THCA	COFACTOR CATABOLIC PROCESS
biomass & energy	THCA	REACTOME ACTIVATION OF CHAPERONES BY ATF6 ALPHA
biomass & energy	THCA	REACTOME CITRIC ACID CYCLE TCA CYCLE
biomass & energy	THCA	FATTY ACID OXIDATION
biomass & energy	THCA	COFACTOR BIOSYNTHETIC PROCESS
biomass & energy	THCA	REACTOME REGULATION OF GENE EXPRESSION IN BETA CELLS
biomass & energy	THCA	REGULATION OF PROTEIN STABILITY
biomass & energy	THCA	HEME BIOSYNTHETIC PROCESS
biomass & energy	THCA	COENZYME BINDING
biomass & energy	THCA	GLUTAMINE FAMILY AMINO ACID METABOLIC PROCESS
biomass & energy	THCA	SECONDARY METABOLIC PROCESS
biomass & energy	THCA	REACTOME VITAMIN B5 PANTOTHENATE METABOLISM
biomass & energy	THCA	HEME METABOLIC PROCESS
biomass & energy	THCA	MITOCHONDRIAL MEMBRANE ORGANIZATION AND BIOGENESIS
biomass & energy	THCA	PHOSPHOINOSITIDE METABOLIC PROCESS
biomass & energy	THCA	PROTEIN AMINO ACID LIPIDATION
biomass & energy	THCA	DEVELOPMENT OF PRIMARY SEXUAL CHARACTERISTICS
biomass & energy	THCA	PHOSPHOINOSITIDE BIOSYNTHETIC PROCESS
biomass & energy	THCA	ER TO GOLGI VESICLE MEDIATED TRANSPORT
biomass & energy	THCA	KEGG SELENOAMINO ACID METABOLISM
biomass & energy	THCA	U12 DEPENDENT SPLICEOSOME
biomass & energy	LIHC	REACTOME FORMATION OF TRANSCRIPTION COUPLED NER TC NER REPAIR COMPLEX
biomass & energy	COAD	COFACTOR CATABOLIC PROCESS
biomass & energy	COAD	REACTOME RNA POL I PROMOTER OPENING
biomass & energy	COAD	REACTOME PACKAGING OF TELOMERE ENDS
biomass & energy	COAD	TRICARBOXYLIC ACID CYCLE INTERMEDIATE METABOLIC PROCESS
biomass & energy	COAD	REACTOME TELOMERE MAINTENANCE
biomass & energy	COAD	REACTOME APOPTOSIS INDUCED DNA FRAGMENTATION
biomass & energy	COAD	REACTOME MEIOTIC RECOMBINATION
biomass & energy	COAD	HEME METABOLIC PROCESS
biomass & energy	COAD	REACTOME RNA POL I TRANSCRIPTION
biomass & energy	COAD	REACTOME TETRAHYDROBIOPTERIN BH4 SYNTHESIS RECYCLING SALVAGE AND REGULATION
biomass & energy	COAD	COFACTOR BIOSYNTHETIC PROCESS
biomass & energy	COAD	REACTOME CITRIC ACID CYCLE TCA CYCLE
biomass & energy	COAD	HEME BIOSYNTHETIC PROCESS
biomass & energy	COAD	GLUTAMINE FAMILY AMINO ACID METABOLIC PROCESS
biomass & energy	COAD	REACTOME AMYLOIDS
biomass & energy	COAD	TRANSCRIPTION ELONGATION REGULATOR ACTIVITY
biomass & energy	COAD	REACTOME CHROMOSOME MAINTENANCE
biomass & energy	COAD	BASE EXCISION REPAIR
biomass & energy	COAD	REACTOME FORMATION OF INCISION COMPLEX IN GG NER
biomass & energy	COAD	REACTOME COPI MEDIATED TRANSPORT
biomass & energy	BRCA	COFACTOR CATABOLIC PROCESS
biomass & energy	BRCA	REACTOME ZINC TRANSPORTERS
biomass & energy	BRCA	PROTEIN AMINO ACID LIPIDATION
biomass & energy	BRCA	REACTOME RNA POL I PROMOTER OPENING
biomass & energy	BRCA	PHOSPHOINOSITIDE BIOSYNTHETIC PROCESS
biomass & energy	BRCA	REACTOME POST TRANSLATIONAL MODIFICATION SYNTHESIS OF GPI ANCHORED PROTEINS
biomass & energy	BRCA	REACTOME PACKAGING OF TELOMERE ENDS
biomass & energy	BRCA	REACTOME CITRIC ACID CYCLE TCA CYCLE
biomass & energy	BRCA	REACTOME RNA POL I TRANSCRIPTION
biomass & energy	BRCA	ER TO GOLGI VESICLE MEDIATED TRANSPORT
biomass & energy	BRCA	REACTOME APOPTOSIS INDUCED DNA FRAGMENTATION
biomass & energy	BRCA	REACTOME ALPHA LINOLENIC ACID ALA METABOLISM
biomass & energy	BRCA	REACTOME TELOMERE MAINTENANCE
biomass & energy	BRCA	TRANSLATIONAL INITIATION
biomass & energy	BRCA	REACTOME MEIOTIC RECOMBINATION
biomass & energy	BRCA	PHOSPHOINOSITIDE METABOLIC PROCESS
biomass & energy	BRCA	REACTOME TETRAHYDROBIOPTERIN BH4 SYNTHESIS RECYCLING SALVAGE AND REGULATION
biomass & energy	BRCA	REACTOME FORMATION OF TRANSCRIPTION COUPLED NER TC NER REPAIR COMPLEX
biomass & energy	BRCA	HETEROGENEOUS NUCLEAR RIBONUCLEOPROTEIN COMPLEX
biomass & energy	BRCA	REACTOME FORMATION OF INCISION COMPLEX IN GG NER
biomass & energy	BRCA	COENZYME BINDING
biomass & energy	BRCA	BASE EXCISION REPAIR
biomass & energy	BRCA	REACTOME CHROMOSOME MAINTENANCE
biomass & energy	BRCA	REACTOME MEIOTIC SYNAPSIS
biomass & energy	BRCA	REACTOME RNA POL II TRANSCRIPTION PRE INITIATION AND PROMOTER OPENING
biomass & energy	BRCA	ORGANELLE OUTER MEMBRANE
biomass & energy	BRCA	REGULATION OF TRANSLATIONAL INITIATION
biomass & energy	BRCA	OUTER MEMBRANE
biomass & energy	BRCA	PHOSPHOLIPID BIOSYNTHETIC PROCESS
biomass & energy	BRCA	MITOCHONDRIAL OUTER MEMBRANE
biomass & energy	BRCA	NEURON APOPTOSIS
biomass & energy	BRCA	KEGG STEROID BIOSYNTHESIS
biomass & energy	BRCA	KEGG CITRATE CYCLE TCA CYCLE
biomass & energy	BRCA	GOLGI VESICLE TRANSPORT
biomass & energy	BRCA	ENDOPLASMIC RETICULUM MEMBRANE
biomass & energy	BRCA	REACTOME RNA POL I RNA POL III AND MITOCHONDRIAL TRANSCRIPTION
biomass & energy	BRCA	REACTOME MTORC1 MEDIATED SIGNALLING
biomass & energy	BRCA	INTEGRAL TO ORGANELLE MEMBRANE
biomass & energy	BRCA	REACTOME MEIOSIS
biomass & energy	BRCA	KEGG N GLYCAN BIOSYNTHESIS
biomass & energy	BRCA	NUCLEAR ENVELOPE ENDOPLASMIC RETICULUM NETWORK
biomass & energy	BRCA	REACTOME ACTIVATION OF CHAPERONES BY ATF6 ALPHA
biomass & energy	BRCA	INTRINSIC TO ORGANELLE MEMBRANE
biomass & energy	BRCA	PROTEIN POLYUBIQUITINATION
biomass & energy	BRCA	REACTOME DEADENYLATION OF MRNA
biomass & energy	BRCA	BIOCARTA MPR PATHWAY
biomass & energy	BRCA	KEGG PEROXISOME
biomass & energy	BRCA	ENDOPLASMIC RETICULUM PART
biomass & energy	BRCA	REACTOME AMYLOIDS
biomass & energy	BRCA	GLUTAMINE FAMILY AMINO ACID METABOLIC PROCESS
biomass & energy	BRCA	PROTEIN MODIFICATION BY SMALL PROTEIN CONJUGATION
biomass & energy	BRCA	PROTEIN RNA COMPLEX ASSEMBLY
biomass & energy	BRCA	INTRA GOLGI VESICLE MEDIATED TRANSPORT
biomass & energy	BRCA	KEGG SELENOAMINO ACID METABOLISM
biomass & energy	BRCA	KEGG RIBOFLAVIN METABOLISM
biomass & energy	BRCA	KEGG PYRUVATE METABOLISM
biomass & energy	BRCA	ORGANELLE MEMBRANE
biomass & energy	BRCA	BIOCARTA AKAPCENTROSOME PATHWAY
biomass & energy	BRCA	PROTEIN TRANSPORTER ACTIVITY
biomass & energy	BRCA	MITOCHONDRIAL MEMBRANE ORGANIZATION AND BIOGENESIS
biomass & energy	BRCA	REACTOME DNA REPAIR
biomass & energy	BRCA	BIOCARTA MTOR PATHWAY
biomass & energy	BRCA	TRANSFERASE ACTIVITY TRANSFERRING GROUPS OTHER THAN AMINO ACYL GROUPS
biomass & energy	BRCA	REACTOME RNA POL I TRANSCRIPTION INITIATION
biomass & energy	BRCA	BIOCARTA RAB PATHWAY
biomass & energy	BRCA	DRUG BINDING
biomass & energy	BRCA	PROTEIN TARGETING TO MITOCHONDRION
biomass & energy	BRCA	MICROTUBULE MOTOR ACTIVITY
biomass & energy	BRCA	REACTOME ACTIVATION OF BH3 ONLY PROTEINS
biomass & energy	BRCA	CHROMATIN ASSEMBLY
biomass & energy	BRCA	REACTOME TRANSCRIPTION
biomass & energy	BRCA	UBIQUITIN CYCLE
biomass & energy	BRCA	PROTEIN UBIQUITINATION
biomass & energy	BLCA	COFACTOR CATABOLIC PROCESS
biomass & energy	BLCA	KEGG PENTOSE AND GLUCURONATE INTERCONVERSIONS
biomass & energy	BLCA	REACTOME RECYCLING OF BILE ACIDS AND SALTS
cell division	LIHC	REACTOME SYNTHESIS OF BILE ACIDS AND BILE SALTS VIA 7ALPHA HYDROXYCHOLESTEROL
cell division	LIHC	REACTOME ALPHA LINOLENIC ACID ALA METABOLISM
cell division	LIHC	KEGG STEROID BIOSYNTHESIS
cell division	LIHC	REACTOME RECRUITMENT OF NUMA TO MITOTIC CENTROSOMES
cell division	LIHC	REACTOME FATTY ACYL COA BIOSYNTHESIS
cell division	LIHC	REACTOME REGULATION OF GENE EXPRESSION IN BETA CELLS
cell division	LIHC	REACTOME CHROMOSOME MAINTENANCE
cell division	LIHC	TELOMERIC DNA BINDING
cell division	LIHC	KEGG BIOSYNTHESIS OF UNSATURATED FATTY ACIDS
cell division	LIHC	KEGG MATURITY ONSET DIABETES OF THE YOUNG
cell division	LIHC	CENTROSOME ORGANIZATION AND BIOGENESIS
cell division	LIHC	REACTOME DNA REPAIR
cell division	LIHC	MICROTUBULE
cell division	LIHC	DNA REPAIR
cell division	LIHC	CHROMATIN ASSEMBLY OR DISASSEMBLY
cell division	LIHC	REACTOME APOPTOSIS INDUCED DNA FRAGMENTATION
cell division	LIHC	ESTABLISHMENT AND OR MAINTENANCE OF CHROMATIN ARCHITECTURE
cell division	LIHC	REACTOME TELOMERE MAINTENANCE
cell division	LIHC	HISTONE METHYLTRANSFERASE ACTIVITY
cell division	LIHC	ANDROGEN RECEPTOR SIGNALING PATHWAY
cell division	LIHC	MICROTUBULE MOTOR ACTIVITY
cell division	LIHC	CHROMATIN ASSEMBLY
cell division	LIHC	PROTEIN METHYLTRANSFERASE ACTIVITY
cell division	LIHC	REACTOME SOS MEDIATED SIGNALLING
cell division	LIHC	REACTOME TRIGLYCERIDE BIOSYNTHESIS
cell division	LIHC	KEGG PEROXISOME
cell division	LGG	TELOMERIC DNA BINDING
cell division	LGG	N TERMINAL PROTEIN AMINO ACID MODIFICATION
cell division	LGG	CHROMATIN REMODELING COMPLEX
cell division	LGG	INTEGRATOR COMPLEX
cell division	LGG	MICROTUBULE
cell division	LGG	REACTOME RECRUITMENT OF NUMA TO MITOTIC CENTROSOMES
cell division	LGG	ANDROGEN RECEPTOR SIGNALING PATHWAY
cell division	LGG	REACTOME RNA POL I TRANSCRIPTION INITIATION
cell division	LGG	HELICASE ACTIVITY
cell division	LGG	HISTONE METHYLTRANSFERASE ACTIVITY
cell division	LGG	CHROMATIN ASSEMBLY
cell division	LGG	CHROMATIN ASSEMBLY OR DISASSEMBLY
cell division	LGG	REACTOME MTORC1 MEDIATED SIGNALLING
cell division	LGG	TRANSCRIPTION INITIATION
cell division	LGG	PROTEIN TRANSPORTER ACTIVITY
cell division	LGG	BIOCARTA MTOR PATHWAY
cell division	LGG	REACTOME DEADENYLATION OF MRNA
cell division	LGG	DAMAGED DNA BINDING
cell division	LGG	PROTEIN DNA COMPLEX ASSEMBLY
cell division	LGG	RNA DEPENDENT ATPASE ACTIVITY
cell division	LGG	REACTOME FORMATION OF RNA POL II ELONGATION COMPLEX
cell division	LGG	PROTEIN RNA COMPLEX ASSEMBLY
cell division	LGG	ATP DEPENDENT RNA HELICASE ACTIVITY
cell division	LGG	NUCLEAR MATRIX
cell division	COAD	NEUTRAL AMINO ACID TRANSPORT
cell division	COAD	REACTOME ZINC TRANSPORTERS
cell division	COAD	NEUTRAL AMINO ACID TRANSMEMBRANE TRANSPORTER ACTIVITY
cell division	COAD	REACTOME RNA POL I TRANSCRIPTION INITIATION
cell division	COAD	REACTOME RNA POL I TRANSCRIPTION TERMINATION
cell division	COAD	REACTOME FORMATION OF TRANSCRIPTION COUPLED NER TC NER REPAIR COMPLEX
cell division	COAD	CENTROSOME ORGANIZATION AND BIOGENESIS
cell division	COAD	REACTOME RNA POL II TRANSCRIPTION PRE INITIATION AND PROMOTER OPENING
cell division	COAD	REACTOME FORMATION OF RNA POL II ELONGATION COMPLEX
cell division	COAD	KEGG CITRATE CYCLE TCA CYCLE
cell division	COAD	ANDROGEN RECEPTOR SIGNALING PATHWAY
cell division	COAD	REGULATION OF PROTEIN STABILITY
cell division	COAD	REACTOME METABOLISM OF VITAMINS AND COFACTORS
cell division	COAD	PROTEIN METHYLTRANSFERASE ACTIVITY
cell division	COAD	TRANSLATIONAL INITIATION
cell division	COAD	REACTOME VITAMIN B5 PANTOTHENATE METABOLISM
cell division	COAD	REACTOME DNA REPAIR
cell division	BRCA	REACTOME E2F ENABLED INHIBITION OF PRE REPLICATION COMPLEX FORMATION
cell division	BRCA	REACTOME CDC6 ASSOCIATION WITH THE ORC ORIGIN COMPLEX
cell division	BRCA	REACTOME ASSOCIATION OF LICENSING FACTORS WITH THE PRE REPLICATIVE COMPLEX
cell division	BRCA	ESTABLISHMENT OF ORGANELLE LOCALIZATION
cell division	BRCA	REACTOME REGULATION OF HYPOXIA INDUCIBLE FACTOR HIF BY OXYGEN
cell division	BRCA	PROTEIN TARGETING TO MITOCHONDRION
cell division	BRCA	REACTOME CHROMOSOME MAINTENANCE
cell division	BRCA	ATP DEPENDENT RNA HELICASE ACTIVITY
cell division	BRCA	REACTOME TELOMERE MAINTENANCE
cell division	BRCA	REACTOME SOS MEDIATED SIGNALLING
cell division	BRCA	RNA DEPENDENT ATPASE ACTIVITY
cell division	BRCA	REACTOME SHC MEDIATED SIGNALLING
cell division	BRCA	DAMAGED DNA BINDING
cell division	BRCA	REACTOME SHC RELATED EVENTS
cell division	BRCA	REACTOME CITRIC ACID CYCLE TCA CYCLE
cell division	BRCA	ORGANELLE LOCALIZATION
cell division	BRCA	REACTOME DNA REPAIR
cell division	BRCA	MICROTUBULE
cell division	BRCA	CHROMATIN ASSEMBLY
cell division	BRCA	PID ARF 3PATHWAY
cell division	BRCA	TRANSCRIPTION INITIATION
cell division	BRCA	N TERMINAL PROTEIN AMINO ACID MODIFICATION
cell division	BRCA	BASE EXCISION REPAIR
cell division	BRCA	REACTOME LOSS OF NLP FROM MITOTIC CENTROSOMES
cell division	BRCA	DRUG BINDING
cell division	BRCA	REACTOME FORMATION OF RNA POL II ELONGATION COMPLEX
cell division	BRCA	CHROMATIN ASSEMBLY OR DISASSEMBLY
cell division	BRCA	REACTOME TRANSCRIPTION
cell division	BRCA	HELICASE ACTIVITY
cell division	BRCA	COFACTOR BIOSYNTHETIC PROCESS
cell division	BRCA	REACTOME APOPTOSIS INDUCED DNA FRAGMENTATION
cell division	BRCA	PROTEIN DNA COMPLEX ASSEMBLY
cell division	BRCA	BIOPOLYMER CATABOLIC PROCESS
cell division	BRCA	KEGG OOCYTE MEIOSIS
cell division	BRCA	REACTOME RECRUITMENT OF MITOTIC CENTROSOME PROTEINS AND COMPLEXES
cell division	BRCA	REACTOME MTORC1 MEDIATED SIGNALLING
cell division	BRCA	KEGG CITRATE CYCLE TCA CYCLE
cell division	BRCA	BIOCARTA AKAPCENTROSOME PATHWAY
cell division	BRCA	PID P53REGULATIONPATHWAY
cell division	BRCA	KEGG VALINE LEUCINE AND ISOLEUCINE BIOSYNTHESIS
cell division	BRCA	BIOCARTA RAB PATHWAY
cell division	BRCA	REACTOME RNA POL II TRANSCRIPTION PRE INITIATION AND PROMOTER OPENING
cell division	BRCA	BIOCARTA MPR PATHWAY
cell division	BRCA	LIGASE ACTIVITY
cell division	BRCA	NUCLEOPLASM
cell division	BRCA	MACROMOLECULE CATABOLIC PROCESS
cell division	BRCA	UBIQUITIN CYCLE
cell division	BRCA	REGULATION OF PROTEIN STABILITY
immune interaction	LIHC	METABOTROPIC GLUTAMATEGABA B LIKE RECEPTOR ACTIVITY
immune interaction	LIHC	KINASE ACTIVATOR ACTIVITY
immune interaction	LIHC	MICROTUBULE MOTOR ACTIVITY
immune interaction	LIHC	REACTOME REGULATION OF HYPOXIA INDUCIBLE FACTOR HIF BY OXYGEN
immune interaction	LIHC	ESTABLISHMENT OF ORGANELLE LOCALIZATION
immune interaction	LIHC	PROTEIN AMINO ACID AUTOPHOSPHORYLATION
immune interaction	LIHC	MOTOR ACTIVITY
immune interaction	LIHC	BIOCARTA BARRESTIN SRC PATHWAY
immune interaction	LIHC	REACTOME HIGHLY CALCIUM PERMEABLE POSTSYNAPTIC NICOTINIC ACETYLCHOLINE RECEPTORS
immune interaction	LIHC	NUCLEAR MATRIX
immune interaction	LIHC	CHROMATIN REMODELING COMPLEX
immune interaction	LIHC	REACTOME RECRUITMENT OF NUMA TO MITOTIC CENTROSOMES
immune interaction	LIHC	REACTOME RECRUITMENT OF MITOTIC CENTROSOME PROTEINS AND COMPLEXES
immune interaction	LIHC	PROTEIN SERINE THREONINE PHOSPHATASE COMPLEX
immune interaction	LIHC	REACTOME LOSS OF NLP FROM MITOTIC CENTROSOMES
immune interaction	LIHC	REACTOME ACTIVATION OF BH3 ONLY PROTEINS
immune interaction	LIHC	BIOCARTA MPR PATHWAY
immune interaction	LIHC	PROTEIN AUTOPROCESSING
immune interaction	LIHC	PROTEIN PHOSPHATASE TYPE 2A REGULATOR ACTIVITY
immune interaction	LIHC	MICROTUBULE POLYMERIZATION OR DEPOLYMERIZATION
immune interaction	LIHC	PURINE RIBONUCLEOTIDE METABOLIC PROCESS
immune interaction	LIHC	BIOCARTA PTDINS PATHWAY
immune interaction	LIHC	BIOCARTA P53 PATHWAY
immune interaction	LIHC	PROTEIN DNA COMPLEX ASSEMBLY
immune interaction	LIHC	SYNAPTIC VESICLE
immune interaction	LIHC	CATION TRANSPORTING ATPASE ACTIVITY
immune interaction	LIHC	CYTOPLASMIC VESICLE MEMBRANE
immune interaction	LIHC	CYTOPLASMIC VESICLE PART
immune interaction	LIHC	REACTOME CHROMOSOME MAINTENANCE
immune interaction	LIHC	HETEROGENEOUS NUCLEAR RIBONUCLEOPROTEIN COMPLEX
immune interaction	LIHC	CHROMATIN ASSEMBLY OR DISASSEMBLY
immune interaction	LIHC	MICROTUBULE
immune interaction	LIHC	REACTOME ACETYLCHOLINE BINDING AND DOWNSTREAM EVENTS
immune interaction	LIHC	CHROMATIN ASSEMBLY
immune interaction	LIHC	PID LKB1 PATHWAY
immune interaction	LIHC	KEGG OOCYTE MEIOSIS
immune interaction	LIHC	REACTOME FACTORS INVOLVED IN MEGAKARYOCYTE DEVELOPMENT AND PLATELET PRODUCTION
immune interaction	LIHC	REACTOME MEIOTIC RECOMBINATION
immune interaction	LIHC	ESTABLISHMENT AND OR MAINTENANCE OF CHROMATIN ARCHITECTURE
immune interaction	LIHC	HELICASE ACTIVITY
immune interaction	LIHC	TRANSCRIPTION INITIATION
immune interaction	LIHC	HISTONE DEACETYLASE COMPLEX
immune interaction	LIHC	NUCLEOPLASM
immune interaction	LIHC	GOLGI ASSOCIATED VESICLE
immune interaction	LIHC	PROTEIN METHYLTRANSFERASE ACTIVITY
immune interaction	LIHC	DENDRITE
immune interaction	LIHC	GAMETE GENERATION
immune interaction	LIHC	CENTROSOME ORGANIZATION AND BIOGENESIS
immune interaction	LIHC	HISTONE METHYLTRANSFERASE ACTIVITY
immune interaction	LIHC	BIOCARTA P35ALZHEIMERS PATHWAY
immune interaction	LIHC	COATED VESICLE
immune interaction	LIHC	BIOCARTA AKAPCENTROSOME PATHWAY
immune interaction	LIHC	REACTOME SHC MEDIATED SIGNALLING
immune interaction	LIHC	PID ARF 3PATHWAY
immune interaction	LIHC	REACTOME RNA POL I PROMOTER OPENING
immune interaction	LIHC	REACTOME RNA POL I TRANSCRIPTION
immune interaction	LIHC	POST GOLGI VESICLE MEDIATED TRANSPORT
immune interaction	LIHC	NUCLEOPLASM PART
immune interaction	LIHC	NUCLEUS
immune interaction	LIHC	REACTOME DNA REPAIR
immune interaction	LIHC	REACTOME MEIOSIS
immune interaction	LIHC	PID INSULIN GLUCOSE PATHWAY
immune interaction	LIHC	GLYCOSPHINGOLIPID METABOLIC PROCESS
immune interaction	LIHC	RESPONSE TO ENDOGENOUS STIMULUS
immune interaction	LIHC	DNA REPAIR
immune interaction	LIHC	CHROMATIN MODIFICATION
immune interaction	LIHC	REACTOME DEADENYLATION OF MRNA
immune interaction	LIHC	UBIQUITIN CYCLE
immune interaction	LIHC	PID P53REGULATIONPATHWAY
immune interaction	LIHC	GLYCOPROTEIN CATABOLIC PROCESS
immune interaction	LIHC	PID HDAC CLASSI PATHWAY
immune interaction	LIHC	MACROMOLECULAR COMPLEX
immune interaction	LIHC	REACTOME RNA POL I RNA POL III AND MITOCHONDRIAL TRANSCRIPTION
immune interaction	LIHC	ATP DEPENDENT RNA HELICASE ACTIVITY
immune interaction	LIHC	NEURON APOPTOSIS
immune interaction	LIHC	COVALENT CHROMATIN MODIFICATION
immune interaction	LIHC	REACTOME TRANSCRIPTION
immune interaction	LIHC	REACTOME SHC RELATED EVENTS
immune interaction	LIHC	RNA DEPENDENT ATPASE ACTIVITY
immune interaction	LIHC	REACTOME MEIOTIC SYNAPSIS
immune interaction	LIHC	BASE EXCISION REPAIR
immune interaction	LIHC	REACTOME LYSOSOME VESICLE BIOGENESIS
immune interaction	LIHC	U12 DEPENDENT SPLICEOSOME
immune interaction	LIHC	REACTOME PACKAGING OF TELOMERE ENDS
immune interaction	LIHC	HISTONE MODIFICATION
immune interaction	LIHC	PID MTOR 4PATHWAY
immune interaction	LIHC	ANDROGEN RECEPTOR SIGNALING PATHWAY
immune interaction	LIHC	REACTOME RNA POL I TRANSCRIPTION TERMINATION
immune interaction	LIHC	REACTOME TELOMERE MAINTENANCE
immune interaction	LIHC	PROTEIN SERINE THREONINE PHOSPHATASE ACTIVITY
immune interaction	LIHC	REACTOME POST TRANSLATIONAL MODIFICATION SYNTHESIS OF GPI ANCHORED PROTEINS
immune interaction	LIHC	REACTOME ZINC TRANSPORTERS
immune interaction	LIHC	PROTEIN UBIQUITINATION
immune interaction	LIHC	PROTEIN MODIFICATION BY SMALL PROTEIN CONJUGATION
immune interaction	LIHC	REACTOME MEMBRANE TRAFFICKING
immune interaction	LIHC	TRANSCRIPTION FROM RNA POLYMERASE III PROMOTER
immune interaction	LIHC	REACTOME RNA POL I TRANSCRIPTION INITIATION
immune interaction	LIHC	KEGG UBIQUITIN MEDIATED PROTEOLYSIS
immune interaction	LIHC	REACTOME COPI MEDIATED TRANSPORT
immune interaction	LIHC	INTEGRATOR COMPLEX
immune interaction	LIHC	ENDOMEMBRANE SYSTEM
immune interaction	LIHC	KEGG VALINE LEUCINE AND ISOLEUCINE BIOSYNTHESIS
immune interaction	LIHC	PHOSPHOINOSITIDE METABOLIC PROCESS
immune interaction	LIHC	REACTOME FORMATION OF RNA POL II ELONGATION COMPLEX
immune interaction	LIHC	REACTOME SOS MEDIATED SIGNALLING
immune interaction	LIHC	REACTOME GOLGI ASSOCIATED VESICLE BIOGENESIS
immune interaction	LIHC	DNA DIRECTED RNA POLYMERASEII HOLOENZYME
immune interaction	LIHC	REACTOME RNA POL II TRANSCRIPTION PRE INITIATION AND PROMOTER OPENING
immune interaction	LIHC	REACTOME TRANS GOLGI NETWORK VESICLE BUDDING
immune interaction	LIHC	INTRACELLULAR TRANSPORT
immune interaction	LIHC	REACTOME MTORC1 MEDIATED SIGNALLING
immune interaction	LIHC	PROTEIN RNA COMPLEX ASSEMBLY
immune interaction	LIHC	GOLGI VESICLE TRANSPORT
immune interaction	LIHC	MITOCHONDRIAL MEMBRANE ORGANIZATION AND BIOGENESIS
immune interaction	LIHC	BIOPOLYMER CATABOLIC PROCESS
immune interaction	LIHC	PROTEIN AMINO ACID LIPIDATION
immune interaction	LGG	BIOCARTA P53 PATHWAY
immune interaction	LGG	MICROTUBULE MOTOR ACTIVITY
immune interaction	LGG	REACTOME AMYLOIDS
immune interaction	LGG	ESTABLISHMENT OF ORGANELLE LOCALIZATION
immune interaction	LGG	DRUG BINDING
immune interaction	LGG	REACTOME MEIOTIC RECOMBINATION
immune interaction	LGG	REACTOME RNA POL I PROMOTER OPENING
immune interaction	LGG	KEGG OTHER GLYCAN DEGRADATION
immune interaction	LGG	REACTOME CHROMOSOME MAINTENANCE
immune interaction	LGG	REACTOME POST TRANSLATIONAL MODIFICATION SYNTHESIS OF GPI ANCHORED PROTEINS
immune interaction	LGG	REACTOME TELOMERE MAINTENANCE
immune interaction	LGG	ORGANELLE LOCALIZATION
immune interaction	LGG	GLYCOPROTEIN CATABOLIC PROCESS
immune interaction	LGG	REACTOME ACTIVATION OF CHAPERONE GENES BY XBP1S
immune interaction	LGG	REACTOME PACKAGING OF TELOMERE ENDS
immune interaction	LGG	KEGG RIBOFLAVIN METABOLISM
immune interaction	LGG	REACTOME MEIOSIS
immune interaction	LGG	KEGG N GLYCAN BIOSYNTHESIS
immune interaction	LGG	ENDOPLASMIC RETICULUM PART
immune interaction	LGG	PROTEIN AMINO ACID LIPIDATION
immune interaction	LGG	KEGG DRUG METABOLISM OTHER ENZYMES
immune interaction	LGG	SECONDARY METABOLIC PROCESS
immune interaction	LGG	DAMAGED DNA BINDING
immune interaction	LGG	ER NUCLEAR SIGNALING PATHWAY
immune interaction	LGG	REACTOME MEIOTIC SYNAPSIS
immune interaction	LGG	REACTOME DNA REPAIR
immune interaction	LGG	REACTOME ACTIVATION OF CHAPERONES BY ATF6 ALPHA
immune interaction	LGG	KEGG VALINE LEUCINE AND ISOLEUCINE BIOSYNTHESIS
immune interaction	LGG	KEGG PEROXISOME
immune interaction	LGG	REACTOME RNA POL I TRANSCRIPTION
immune interaction	LGG	REACTOME APOPTOSIS INDUCED DNA FRAGMENTATION
immune interaction	LGG	ENDOPLASMIC RETICULUM MEMBRANE
immune interaction	LGG	REACTOME FACTORS INVOLVED IN MEGAKARYOCYTE DEVELOPMENT AND PLATELET PRODUCTION
immune interaction	LGG	MOTOR ACTIVITY
immune interaction	LGG	PHOSPHOINOSITIDE BIOSYNTHETIC PROCESS
immune interaction	LGG	NUCLEAR ENVELOPE ENDOPLASMIC RETICULUM NETWORK
immune interaction	LGG	REACTOME SYNTHESIS OF PE
immune interaction	LGG	TRANSFERASE ACTIVITY TRANSFERRING GROUPS OTHER THAN AMINO ACYL GROUPS
immune interaction	LGG	KEGG MATURITY ONSET DIABETES OF THE YOUNG
immune interaction	LGG	REACTOME ALPHA LINOLENIC ACID ALA METABOLISM
immune interaction	LGG	CYTOPLASMIC VESICLE MEMBRANE
immune interaction	LGG	CYTOPLASMIC VESICLE PART
immune interaction	LGG	KEGG PORPHYRIN AND CHLOROPHYLL METABOLISM
immune interaction	LGG	RESPONSE TO ENDOGENOUS STIMULUS
immune interaction	LGG	ER TO GOLGI VESICLE MEDIATED TRANSPORT
immune interaction	LGG	REACTOME REGULATION OF GENE EXPRESSION IN BETA CELLS
immune interaction	LGG	DNA REPAIR
immune interaction	LGG	REACTOME METABOLISM OF VITAMINS AND COFACTORS
immune interaction	LGG	HEME METABOLIC PROCESS
immune interaction	LGG	HEME BIOSYNTHETIC PROCESS
immune interaction	LGG	NEUTRAL AMINO ACID TRANSMEMBRANE TRANSPORTER ACTIVITY
immune interaction	LGG	CENTROSOME ORGANIZATION AND BIOGENESIS
immune interaction	LGG	REACTOME FORMATION OF INCISION COMPLEX IN GG NER
immune interaction	LGG	INTRINSIC TO ORGANELLE MEMBRANE
immune interaction	LGG	INTEGRAL TO ORGANELLE MEMBRANE
immune interaction	LGG	REACTOME RNA POL I TRANSCRIPTION TERMINATION
immune interaction	LGG	REACTOME RNA POL I RNA POL III AND MITOCHONDRIAL TRANSCRIPTION
immune interaction	LGG	ENDOMEMBRANE SYSTEM
immune interaction	LGG	BASE EXCISION REPAIR
immune interaction	LGG	KEGG PENTOSE AND GLUCURONATE INTERCONVERSIONS
immune interaction	LGG	PID ARF 3PATHWAY
immune interaction	LGG	PROTEIN SERINE THREONINE PHOSPHATASE ACTIVITY
immune interaction	BLCA	NEURON APOPTOSIS
immune interaction	BLCA	REACTOME RNA POL I TRANSCRIPTION TERMINATION
immune interaction	BLCA	PROTEIN SERINE THREONINE PHOSPHATASE COMPLEX
immune interaction	BLCA	REACTOME SOS MEDIATED SIGNALLING
immune interaction	BLCA	PID MTOR 4PATHWAY
immune interaction	BLCA	DEVELOPMENT OF PRIMARY SEXUAL CHARACTERISTICS
immune interaction	BLCA	REACTOME RNA POL II TRANSCRIPTION PRE INITIATION AND PROMOTER OPENING
immune interaction	BLCA	TRANSITION METAL ION TRANSMEMBRANE TRANSPORTER ACTIVITY
immune interaction	BLCA	REACTOME MTORC1 MEDIATED SIGNALLING
immune interaction	BLCA	BIOCARTA P35ALZHEIMERS PATHWAY
immune interaction	BLCA	TRANSCRIPTION INITIATION
immune interaction	BLCA	ATP DEPENDENT RNA HELICASE ACTIVITY
immune interaction	BLCA	CENTROSOME ORGANIZATION AND BIOGENESIS
immune interaction	BLCA	RNA DEPENDENT ATPASE ACTIVITY
immune interaction	BLCA	REACTOME CTNNB1 PHOSPHORYLATION CASCADE
immune interaction	BLCA	PURINE RIBONUCLEOTIDE METABOLIC PROCESS
immune interaction	BLCA	PROTEIN POLYUBIQUITINATION
immune interaction	BLCA	KINASE ACTIVATOR ACTIVITY
immune interaction	BLCA	HELICASE ACTIVITY
immune interaction	BLCA	REACTOME RNA POL I TRANSCRIPTION INITIATION
immune interaction	BLCA	COFACTOR BIOSYNTHETIC PROCESS
invasion & signaling	THCA	METABOTROPIC GLUTAMATEGABA B LIKE RECEPTOR ACTIVITY
invasion & signaling	THCA	ESTABLISHMENT OF ORGANELLE LOCALIZATION
invasion & signaling	THCA	KINASE ACTIVATOR ACTIVITY
invasion & signaling	THCA	REACTOME PRESYNAPTIC NICOTINIC ACETYLCHOLINE RECEPTORS
invasion & signaling	THCA	GLYCOSPHINGOLIPID METABOLIC PROCESS
invasion & signaling	THCA	AMINE TRANSMEMBRANE TRANSPORTER ACTIVITY
invasion & signaling	THCA	AMINO ACID TRANSMEMBRANE TRANSPORTER ACTIVITY
invasion & signaling	THCA	MICROTUBULE MOTOR ACTIVITY
invasion & signaling	THCA	ORGANELLE LOCALIZATION
invasion & signaling	THCA	REACTOME ACETYLCHOLINE BINDING AND DOWNSTREAM EVENTS
invasion & signaling	THCA	REACTOME HIGHLY CALCIUM PERMEABLE POSTSYNAPTIC NICOTINIC ACETYLCHOLINE RECEPTORS
invasion & signaling	THCA	MOTOR ACTIVITY
invasion & signaling	THCA	KEGG OOCYTE MEIOSIS
invasion & signaling	THCA	NEUTRAL AMINO ACID TRANSPORT
invasion & signaling	THCA	CELLULAR RESPONSE TO NUTRIENT LEVELS
invasion & signaling	THCA	NEURON APOPTOSIS
invasion & signaling	THCA	AMINO ACID TRANSPORT
invasion & signaling	THCA	BIOCARTA BARRESTIN SRC PATHWAY
invasion & signaling	THCA	PROTEIN AUTOPROCESSING
invasion & signaling	THCA	TELOMERIC DNA BINDING
invasion & signaling	THCA	REACTOME FACTORS INVOLVED IN MEGAKARYOCYTE DEVELOPMENT AND PLATELET PRODUCTION
invasion & signaling	THCA	HISTONE METHYLTRANSFERASE ACTIVITY
invasion & signaling	THCA	PROTEIN AMINO ACID AUTOPHOSPHORYLATION
invasion & signaling	THCA	REACTOME FATTY ACYL COA BIOSYNTHESIS
invasion & signaling	THCA	PURINE RIBONUCLEOTIDE METABOLIC PROCESS
invasion & signaling	THCA	CATION TRANSPORTING ATPASE ACTIVITY
invasion & signaling	THCA	CYTOPLASMIC VESICLE MEMBRANE
invasion & signaling	THCA	CYTOPLASMIC VESICLE PART
invasion & signaling	THCA	KEGG DRUG METABOLISM OTHER ENZYMES
invasion & signaling	THCA	DENDRITE
invasion & signaling	THCA	BIOCARTA AKAPCENTROSOME PATHWAY
invasion & signaling	THCA	NEUTRAL AMINO ACID TRANSMEMBRANE TRANSPORTER ACTIVITY
invasion & signaling	THCA	PROTEIN SERINE THREONINE PHOSPHATASE ACTIVITY
invasion & signaling	THCA	PROTEIN METHYLTRANSFERASE ACTIVITY
invasion & signaling	THCA	REACTOME SYNTHESIS OF BILE ACIDS AND BILE SALTS VIA 7ALPHA HYDROXYCHOLESTEROL
invasion & signaling	THCA	MACROMOLECULAR COMPLEX
invasion & signaling	THCA	BIOCARTA MPR PATHWAY
invasion & signaling	THCA	MICROTUBULE
invasion & signaling	THCA	REACTOME SHC MEDIATED SIGNALLING
invasion & signaling	THCA	RESPONSE TO ENDOGENOUS STIMULUS
invasion & signaling	THCA	REACTOME TETRAHYDROBIOPTERIN BH4 SYNTHESIS RECYCLING SALVAGE AND REGULATION
invasion & signaling	THCA	NUCLEUS
invasion & signaling	THCA	REACTOME LOSS OF NLP FROM MITOTIC CENTROSOMES
invasion & signaling	THCA	PID ARF 3PATHWAY
invasion & signaling	THCA	KEGG BIOSYNTHESIS OF UNSATURATED FATTY ACIDS
invasion & signaling	THCA	REACTOME LYSOSOME VESICLE BIOGENESIS
invasion & signaling	THCA	NUCLEAR MATRIX
invasion & signaling	THCA	BIOCARTA PTDINS PATHWAY
invasion & signaling	THCA	BIOCARTA P53 PATHWAY
invasion & signaling	THCA	CENTROSOME ORGANIZATION AND BIOGENESIS
invasion & signaling	THCA	REACTOME ACTIVATION OF BH3 ONLY PROTEINS
invasion & signaling	THCA	DETECTION OF STIMULUS INVOLVED IN SENSORY PERCEPTION
invasion & signaling	THCA	ER NUCLEAR SIGNALING PATHWAY
invasion & signaling	THCA	BIOCARTA P35ALZHEIMERS PATHWAY
invasion & signaling	THCA	REACTOME RECRUITMENT OF MITOTIC CENTROSOME PROTEINS AND COMPLEXES
invasion & signaling	THCA	INTRACELLULAR TRANSPORT
invasion & signaling	THCA	DEVELOPMENT OF PRIMARY SEXUAL CHARACTERISTICS
invasion & signaling	THCA	REACTOME SHC RELATED EVENTS
invasion & signaling	THCA	BIOPOLYMER CATABOLIC PROCESS
invasion & signaling	THCA	REACTOME SOS MEDIATED SIGNALLING
invasion & signaling	THCA	REACTOME CHROMOSOME MAINTENANCE
invasion & signaling	THCA	ENDOMEMBRANE SYSTEM
invasion & signaling	THCA	PID LKB1 PATHWAY
invasion & signaling	THCA	BIOCARTA RAB PATHWAY
invasion & signaling	LIHC	REACTOME SYNTHESIS OF BILE ACIDS AND BILE SALTS VIA 7ALPHA HYDROXYCHOLESTEROL
invasion & signaling	LIHC	REACTOME RECYCLING OF BILE ACIDS AND SALTS
invasion & signaling	LIHC	KEGG DRUG METABOLISM OTHER ENZYMES
invasion & signaling	LIHC	FATTY ACID OXIDATION
invasion & signaling	LIHC	REACTOME AMINE DERIVED HORMONES
invasion & signaling	LIHC	AMINO ACID CATABOLIC PROCESS
invasion & signaling	LIHC	KEGG PENTOSE AND GLUCURONATE INTERCONVERSIONS
invasion & signaling	LIHC	AMINO ACID TRANSMEMBRANE TRANSPORTER ACTIVITY
invasion & signaling	LIHC	METABOTROPIC GLUTAMATEGABA B LIKE RECEPTOR ACTIVITY
invasion & signaling	LIHC	AMINO ACID TRANSPORT
invasion & signaling	LIHC	AMINE TRANSMEMBRANE TRANSPORTER ACTIVITY
invasion & signaling	LIHC	REACTOME REGULATION OF GENE EXPRESSION IN BETA CELLS
invasion & signaling	LIHC	KEGG PYRUVATE METABOLISM
invasion & signaling	LIHC	KEGG BUTANOATE METABOLISM
invasion & signaling	LIHC	KEGG BIOSYNTHESIS OF UNSATURATED FATTY ACIDS
invasion & signaling	LIHC	KEGG PORPHYRIN AND CHLOROPHYLL METABOLISM
invasion & signaling	LIHC	PROTEIN AUTOPROCESSING
invasion & signaling	LIHC	REACTOME TETRAHYDROBIOPTERIN BH4 SYNTHESIS RECYCLING SALVAGE AND REGULATION
invasion & signaling	LIHC	PROTEIN AMINO ACID AUTOPHOSPHORYLATION
invasion & signaling	LIHC	REACTOME GLUCOSE METABOLISM
invasion & signaling	LIHC	REACTOME SULFUR AMINO ACID METABOLISM
invasion & signaling	LIHC	KEGG SELENOAMINO ACID METABOLISM
invasion & signaling	LIHC	SECONDARY METABOLIC PROCESS
invasion & signaling	LIHC	TRANSITION METAL ION TRANSMEMBRANE TRANSPORTER ACTIVITY
invasion & signaling	LIHC	KEGG CITRATE CYCLE TCA CYCLE
invasion & signaling	LIHC	REACTOME CITRIC ACID CYCLE TCA CYCLE
invasion & signaling	LIHC	REACTOME ALPHA LINOLENIC ACID ALA METABOLISM
invasion & signaling	LIHC	GLYCOSPHINGOLIPID METABOLIC PROCESS
invasion & signaling	LIHC	KEGG LIMONENE AND PINENE DEGRADATION
invasion & signaling	LIHC	KEGG PEROXISOME
invasion & signaling	LIHC	TRANSFERASE ACTIVITY TRANSFERRING GROUPS OTHER THAN AMINO ACYL GROUPS
invasion & signaling	LIHC	REACTOME ACETYLCHOLINE BINDING AND DOWNSTREAM EVENTS
invasion & signaling	LIHC	BIOCARTA PTDINS PATHWAY
invasion & signaling	LIHC	REACTOME SYNTHESIS OF PIPS AT THE GOLGI MEMBRANE
invasion & signaling	LIHC	GLUTAMINE FAMILY AMINO ACID METABOLIC PROCESS
invasion & signaling	LIHC	DETECTION OF STIMULUS INVOLVED IN SENSORY PERCEPTION
invasion & signaling	LIHC	NEURON APOPTOSIS
invasion & signaling	LIHC	REACTOME TRIGLYCERIDE BIOSYNTHESIS
invasion & signaling	LIHC	CELLULAR CATABOLIC PROCESS
invasion & signaling	LIHC	KEGG MATURITY ONSET DIABETES OF THE YOUNG
invasion & signaling	LIHC	CATABOLIC PROCESS
invasion & signaling	LIHC	REACTOME METABOLISM OF VITAMINS AND COFACTORS
invasion & signaling	LIHC	NEUTRAL AMINO ACID TRANSPORT
invasion & signaling	LIHC	CATION TRANSPORTING ATPASE ACTIVITY
invasion & signaling	LIHC	KEGG N GLYCAN BIOSYNTHESIS
invasion & signaling	LIHC	BIOCARTA CHREBP2 PATHWAY
invasion & signaling	LIHC	HEME BIOSYNTHETIC PROCESS
invasion & signaling	LIHC	POST GOLGI VESICLE MEDIATED TRANSPORT
invasion & signaling	LIHC	INTRACELLULAR TRANSPORT
invasion & signaling	LIHC	HEME METABOLIC PROCESS
invasion & signaling	LIHC	REGULATION OF CATABOLIC PROCESS
invasion & signaling	LIHC	PROTEIN SERINE THREONINE PHOSPHATASE ACTIVITY
invasion & signaling	LGG	METABOTROPIC GLUTAMATEGABA B LIKE RECEPTOR ACTIVITY
invasion & signaling	LGG	SYNAPTIC VESICLE
invasion & signaling	LGG	REACTOME HIGHLY CALCIUM PERMEABLE POSTSYNAPTIC NICOTINIC ACETYLCHOLINE RECEPTORS
invasion & signaling	LGG	TRICARBOXYLIC ACID CYCLE INTERMEDIATE METABOLIC PROCESS
invasion & signaling	LGG	DENDRITE
invasion & signaling	LGG	REACTOME PRESYNAPTIC NICOTINIC ACETYLCHOLINE RECEPTORS
invasion & signaling	LGG	REACTOME ACETYLCHOLINE BINDING AND DOWNSTREAM EVENTS
invasion & signaling	LGG	NEUTRAL AMINO ACID TRANSPORT
invasion & signaling	LGG	REACTOME AMINE DERIVED HORMONES
invasion & signaling	LGG	CATION TRANSPORTING ATPASE ACTIVITY
invasion & signaling	LGG	BIOCARTA BARRESTIN SRC PATHWAY
invasion & signaling	LGG	PROTEIN AMINO ACID AUTOPHOSPHORYLATION
invasion & signaling	LGG	PROTEIN AUTOPROCESSING
invasion & signaling	LGG	GLYCOSPHINGOLIPID METABOLIC PROCESS
invasion & signaling	LGG	REACTOME TETRAHYDROBIOPTERIN BH4 SYNTHESIS RECYCLING SALVAGE AND REGULATION
invasion & signaling	LGG	PURINE RIBONUCLEOTIDE METABOLIC PROCESS
invasion & signaling	LGG	AMINO ACID TRANSMEMBRANE TRANSPORTER ACTIVITY
invasion & signaling	LGG	AMINO ACID TRANSPORT
invasion & signaling	LGG	BIOCARTA CHREBP2 PATHWAY
invasion & signaling	LGG	REGULATION OF CATABOLIC PROCESS
invasion & signaling	LGG	COATED VESICLE
invasion & signaling	LGG	GLUTAMINE FAMILY AMINO ACID METABOLIC PROCESS
invasion & signaling	LGG	CELLULAR RESPONSE TO STRESS
invasion & signaling	LGG	AMINE TRANSMEMBRANE TRANSPORTER ACTIVITY
invasion & signaling	LGG	REACTOME ZINC TRANSPORTERS
invasion & signaling	LGG	TRANSITION METAL ION TRANSMEMBRANE TRANSPORTER ACTIVITY
invasion & signaling	LGG	DETECTION OF STIMULUS INVOLVED IN SENSORY PERCEPTION
invasion & signaling	LGG	REACTOME TRIGLYCERIDE BIOSYNTHESIS
invasion & signaling	LGG	KINASE ACTIVATOR ACTIVITY
invasion & signaling	LGG	REACTOME SYNTHESIS OF PE
invasion & signaling	LGG	MICROTUBULE POLYMERIZATION OR DEPOLYMERIZATION
invasion & signaling	LGG	KEGG PYRUVATE METABOLISM
invasion & signaling	LGG	BIOCARTA RAB PATHWAY
invasion & signaling	LGG	REACTOME FATTY ACYL COA BIOSYNTHESIS
invasion & signaling	LGG	SECONDARY METABOLIC PROCESS
invasion & signaling	LGG	BIOCARTA P35ALZHEIMERS PATHWAY
invasion & signaling	LGG	AMINO ACID CATABOLIC PROCESS
invasion & signaling	LGG	REACTOME GLUCOSE METABOLISM
invasion & signaling	LGG	BIOCARTA MPR PATHWAY
invasion & signaling	LGG	REACTOME SYNTHESIS OF BILE ACIDS AND BILE SALTS VIA 7ALPHA HYDROXYCHOLESTEROL
invasion & signaling	LGG	CELLULAR RESPONSE TO NUTRIENT LEVELS
invasion & signaling	LGG	KEGG BUTANOATE METABOLISM
invasion & signaling	LGG	KEGG CITRATE CYCLE TCA CYCLE
invasion & signaling	LGG	NEUTRAL AMINO ACID TRANSMEMBRANE TRANSPORTER ACTIVITY
invasion & signaling	LGG	PROTEIN SERINE THREONINE PHOSPHATASE COMPLEX
invasion & signaling	LGG	POST GOLGI VESICLE MEDIATED TRANSPORT
invasion & signaling	LGG	NEURON APOPTOSIS
invasion & signaling	LGG	REACTOME GOLGI ASSOCIATED VESICLE BIOGENESIS
invasion & signaling	LGG	REACTOME SYNTHESIS OF PIPS AT THE GOLGI MEMBRANE
invasion & signaling	LGG	REACTOME LYSOSOME VESICLE BIOGENESIS
invasion & signaling	LGG	UBIQUITIN CYCLE
invasion & signaling	LGG	REACTOME VITAMIN B5 PANTOTHENATE METABOLISM
invasion & signaling	LGG	MITOCHONDRIAL OUTER MEMBRANE
invasion & signaling	LGG	REACTOME RECYCLING OF BILE ACIDS AND SALTS
invasion & signaling	LGG	PID LKB1 PATHWAY
invasion & signaling	LGG	KEGG BIOSYNTHESIS OF UNSATURATED FATTY ACIDS
invasion & signaling	LGG	BIOCARTA PTDINS PATHWAY
invasion & signaling	LGG	PROTEIN UBIQUITINATION
invasion & signaling	LGG	REACTOME MEMBRANE TRAFFICKING
invasion & signaling	LGG	PID INSULIN GLUCOSE PATHWAY
invasion & signaling	LGG	REACTOME SOS MEDIATED SIGNALLING
invasion & signaling	LGG	KEGG OOCYTE MEIOSIS
invasion & signaling	LGG	OUTER MEMBRANE
invasion & signaling	LGG	REACTOME TRANS GOLGI NETWORK VESICLE BUDDING
invasion & signaling	LGG	HISTONE MODIFICATION
invasion & signaling	LGG	GAMETE GENERATION
invasion & signaling	LGG	ORGANELLE OUTER MEMBRANE
invasion & signaling	LGG	BIOCARTA AKAPCENTROSOME PATHWAY
invasion & signaling	LGG	GOLGI ASSOCIATED VESICLE
invasion & signaling	LGG	PROTEIN MODIFICATION BY SMALL PROTEIN CONJUGATION
invasion & signaling	LGG	REACTOME SHC MEDIATED SIGNALLING
invasion & signaling	LGG	REACTOME SHC RELATED EVENTS
invasion & signaling	LGG	REACTOME REGULATION OF GENE EXPRESSION IN BETA CELLS
invasion & signaling	LGG	REACTOME CITRIC ACID CYCLE TCA CYCLE
invasion & signaling	LGG	KEGG OLFACTORY TRANSDUCTION
invasion & signaling	LGG	CHROMATIN ASSEMBLY
invasion & signaling	LGG	PROTEIN PHOSPHATASE TYPE 2A REGULATOR ACTIVITY
invasion & signaling	LGG	KEGG REGULATION OF AUTOPHAGY
invasion & signaling	LGG	COFACTOR CATABOLIC PROCESS
invasion & signaling	LGG	PHOSPHOINOSITIDE METABOLIC PROCESS
invasion & signaling	LGG	PROTEIN SERINE THREONINE PHOSPHATASE ACTIVITY
invasion & signaling	LGG	COFACTOR BIOSYNTHETIC PROCESS
invasion & signaling	COAD	REACTOME HIGHLY CALCIUM PERMEABLE POSTSYNAPTIC NICOTINIC ACETYLCHOLINE RECEPTORS
invasion & signaling	COAD	REACTOME PRESYNAPTIC NICOTINIC ACETYLCHOLINE RECEPTORS
invasion & signaling	COAD	GLYCOSPHINGOLIPID METABOLIC PROCESS
invasion & signaling	COAD	REACTOME ACETYLCHOLINE BINDING AND DOWNSTREAM EVENTS
invasion & signaling	COAD	METABOTROPIC GLUTAMATEGABA B LIKE RECEPTOR ACTIVITY
invasion & signaling	COAD	REACTOME ALPHA LINOLENIC ACID ALA METABOLISM
invasion & signaling	COAD	NEURON APOPTOSIS
invasion & signaling	COAD	AMINE TRANSMEMBRANE TRANSPORTER ACTIVITY
invasion & signaling	COAD	DENDRITE
invasion & signaling	COAD	MOTOR ACTIVITY
invasion & signaling	COAD	KINASE ACTIVATOR ACTIVITY
invasion & signaling	COAD	PROTEIN AMINO ACID AUTOPHOSPHORYLATION
invasion & signaling	COAD	BIOCARTA BARRESTIN SRC PATHWAY
invasion & signaling	COAD	CHROMATIN REMODELING COMPLEX
invasion & signaling	COAD	REACTOME AMINE DERIVED HORMONES
invasion & signaling	COAD	SYNAPTIC VESICLE
invasion & signaling	COAD	PROTEIN AUTOPROCESSING
invasion & signaling	COAD	BIOCARTA AKAPCENTROSOME PATHWAY
invasion & signaling	COAD	MICROTUBULE POLYMERIZATION OR DEPOLYMERIZATION
invasion & signaling	COAD	CATION TRANSPORTING ATPASE ACTIVITY
invasion & signaling	COAD	ESTABLISHMENT OF ORGANELLE LOCALIZATION
invasion & signaling	COAD	CHROMATIN ASSEMBLY
invasion & signaling	COAD	DETECTION OF STIMULUS INVOLVED IN SENSORY PERCEPTION
invasion & signaling	COAD	MICROTUBULE MOTOR ACTIVITY
invasion & signaling	COAD	AMINO ACID TRANSMEMBRANE TRANSPORTER ACTIVITY
invasion & signaling	COAD	ORGANELLE LOCALIZATION
invasion & signaling	COAD	PID LKB1 PATHWAY
invasion & signaling	COAD	COATED VESICLE
invasion & signaling	COAD	AMINO ACID TRANSPORT
invasion & signaling	COAD	PROTEIN SERINE THREONINE PHOSPHATASE ACTIVITY
invasion & signaling	COAD	INTRACELLULAR TRANSPORT
invasion & signaling	COAD	KEGG OOCYTE MEIOSIS
invasion & signaling	COAD	BIOCARTA MPR PATHWAY
invasion & signaling	COAD	BIOCARTA P35ALZHEIMERS PATHWAY
invasion & signaling	COAD	POST GOLGI VESICLE MEDIATED TRANSPORT
invasion & signaling	COAD	GAMETE GENERATION
invasion & signaling	COAD	REACTOME FACTORS INVOLVED IN MEGAKARYOCYTE DEVELOPMENT AND PLATELET PRODUCTION
invasion & signaling	COAD	MACROMOLECULAR COMPLEX
invasion & signaling	COAD	BIOCARTA CHREBP2 PATHWAY
invasion & signaling	COAD	GLYCOPROTEIN CATABOLIC PROCESS
invasion & signaling	COAD	KEGG REGULATION OF AUTOPHAGY
invasion & signaling	COAD	PROTEIN PHOSPHATASE TYPE 2A REGULATOR ACTIVITY
invasion & signaling	COAD	PID HDAC CLASSI PATHWAY
invasion & signaling	COAD	SECONDARY METABOLIC PROCESS
invasion & signaling	COAD	BIOCARTA PTDINS PATHWAY
invasion & signaling	COAD	GOLGI ASSOCIATED VESICLE
invasion & signaling	COAD	PURINE RIBONUCLEOTIDE METABOLIC PROCESS
invasion & signaling	COAD	PID ARF 3PATHWAY
invasion & signaling	COAD	REACTOME AMYLOIDS
invasion & signaling	COAD	REACTOME SYNTHESIS OF PIPS AT THE GOLGI MEMBRANE
invasion & signaling	COAD	PROTEIN DNA COMPLEX ASSEMBLY
invasion & signaling	COAD	UBIQUITIN CYCLE
invasion & signaling	COAD	KEGG BIOSYNTHESIS OF UNSATURATED FATTY ACIDS
invasion & signaling	COAD	NUCLEUS
invasion & signaling	COAD	NEUTRAL AMINO ACID TRANSMEMBRANE TRANSPORTER ACTIVITY
invasion & signaling	COAD	REACTOME ACTIVATION OF CHAPERONE GENES BY XBP1S
invasion & signaling	COAD	NUCLEAR MATRIX
invasion & signaling	COAD	REACTOME REGULATION OF HYPOXIA INDUCIBLE FACTOR HIF BY OXYGEN
invasion & signaling	COAD	PROTEIN TRANSPORTER ACTIVITY
invasion & signaling	COAD	REACTOME LYSOSOME VESICLE BIOGENESIS
invasion & signaling	COAD	REACTOME MEMBRANE TRAFFICKING
invasion & signaling	COAD	INTRINSIC TO ORGANELLE MEMBRANE
invasion & signaling	COAD	INTEGRAL TO ORGANELLE MEMBRANE
invasion & signaling	COAD	CELLULAR RESPONSE TO STIMULUS
invasion & signaling	COAD	CHROMATIN ASSEMBLY OR DISASSEMBLY
invasion & signaling	COAD	ENDOMEMBRANE SYSTEM
invasion & signaling	COAD	HISTONE DEACETYLASE COMPLEX
invasion & signaling	BLCA	REACTOME AMINE DERIVED HORMONES
invasion & signaling	BLCA	GLYCOSPHINGOLIPID METABOLIC PROCESS
invasion & signaling	BLCA	AMINE TRANSMEMBRANE TRANSPORTER ACTIVITY
invasion & signaling	BLCA	METABOTROPIC GLUTAMATEGABA B LIKE RECEPTOR ACTIVITY
invasion & signaling	BLCA	REACTOME SYNTHESIS OF BILE ACIDS AND BILE SALTS VIA 7ALPHA HYDROXYCHOLESTEROL
invasion & signaling	BLCA	REACTOME ACETYLCHOLINE BINDING AND DOWNSTREAM EVENTS
invasion & signaling	BLCA	REACTOME HIGHLY CALCIUM PERMEABLE POSTSYNAPTIC NICOTINIC ACETYLCHOLINE RECEPTORS
invasion & signaling	BLCA	SYNAPTIC VESICLE
invasion & signaling	BLCA	AMINO ACID TRANSMEMBRANE TRANSPORTER ACTIVITY
invasion & signaling	BLCA	KEGG LIMONENE AND PINENE DEGRADATION
invasion & signaling	BLCA	DENDRITE
invasion & signaling	BLCA	AMINO ACID TRANSPORT
invasion & signaling	BLCA	REACTOME ALPHA LINOLENIC ACID ALA METABOLISM
invasion & signaling	BLCA	NEURON APOPTOSIS
invasion & signaling	BLCA	CELLULAR RESPONSE TO NUTRIENT LEVELS
invasion & signaling	BLCA	REACTOME LYSOSOME VESICLE BIOGENESIS
invasion & signaling	BLCA	BIOCARTA AKAPCENTROSOME PATHWAY
invasion & signaling	BLCA	DETECTION OF STIMULUS INVOLVED IN SENSORY PERCEPTION
invasion & signaling	BLCA	KEGG PYRUVATE METABOLISM
invasion & signaling	BLCA	KINASE ACTIVATOR ACTIVITY
invasion & signaling	BLCA	REACTOME PRESYNAPTIC NICOTINIC ACETYLCHOLINE RECEPTORS
invasion & signaling	BLCA	CATION TRANSPORTING ATPASE ACTIVITY
invasion & signaling	BLCA	REACTOME ACTIVATION OF CHAPERONE GENES BY XBP1S
invasion & signaling	BLCA	PROTEIN TRANSPORTER ACTIVITY
invasion & signaling	BLCA	KEGG OTHER GLYCAN DEGRADATION
invasion & signaling	BLCA	CHROMATIN ASSEMBLY
invasion & signaling	BLCA	CELLULAR RESPONSE TO STRESS
invasion & signaling	BLCA	AMINO ACID CATABOLIC PROCESS
invasion & signaling	BLCA	GAMETE GENERATION
invasion & signaling	BLCA	BIOCARTA CHREBP2 PATHWAY
invasion & signaling	BLCA	COATED VESICLE
invasion & signaling	BLCA	MOTOR ACTIVITY
invasion & signaling	BLCA	MACROMOLECULAR COMPLEX
invasion & signaling	BLCA	REACTOME TRANS GOLGI NETWORK VESICLE BUDDING
invasion & signaling	BLCA	REACTOME TRIGLYCERIDE BIOSYNTHESIS
invasion & signaling	BLCA	BIOCARTA P53 PATHWAY
invasion & signaling	BLCA	REACTOME GOLGI ASSOCIATED VESICLE BIOGENESIS
invasion & signaling	BLCA	INTEGRAL TO ORGANELLE MEMBRANE
invasion & signaling	BLCA	MICROTUBULE POLYMERIZATION OR DEPOLYMERIZATION
invasion & signaling	BLCA	INTRINSIC TO ORGANELLE MEMBRANE
invasion & signaling	BLCA	CELLULAR RESPONSE TO STIMULUS
invasion & signaling	BLCA	INTRACELLULAR TRANSPORT
